# Supplementary material for: The N6-methyladenosine-modified Pseudogene HSPA7 Correlates with the Tumor Microenvironment and Predicts the Response to Immune Checkpoint Therapy in Glioblastoma
Source: Research Square preprint supplement (doi:10.21203/rs.3.rs-130869/v1), 2020-12-22
Supplement: Supplementary file 1 [file b663788113e39af171d87ebb.xlsx]

## Sheet: Annotation
Input ID	Gene ID	Type	Tax ID	Homologene Gene ID	Homologene Gene Tax ID	Gene Symbol	Description	Biological Process (GO)	Kinase Class (UniProt)	Protein Function (Protein Atlas)	Subcellular Location (Protein Atlas)	Drug (DrugBank)	Canonical Pathways	Hallmark Gene Sets	GO:0002263 cell activation involved in im	GO:0019221 cytokine-mediated signaling pa	GO:0042110 T cell activation	GO:0001817 regulation of cytokine product	GO:0050900 leukocyte migration	GO:0002250 adaptive immune response	GO:0002253 activation of immune response	GO:0009617 response to bacterium	GO:0031349 positive regulation of defense	GO:0046631 alpha-beta T cell activation	GO:0002683 negative regulation of immune	GO:0043062 extracellular structure organi	hsa05152 Tuberculosis	GO:0050727 regulation of inflammatory res	R-HSA-1280218 Adaptive Immune System	M5885 NABA MATRISOME ASSOCIATED	hsa04380 Osteoclast differentiation	R-HSA-6783783 Interleukin-10 signaling	GO:0002573 myeloid leukocyte differentiat	GO:0009611 response to wounding
1-Sep						None	None	None	None	None	None	None	None	None	nan	nan	nan	nan	nan	nan	nan	nan	nan	nan	nan	nan	nan	nan	nan	nan	nan	nan	nan	nan
A2M	2	symbol	H. sapiens	2	H. sapiens	A2M	alpha-2-macroglobulin	GO:0001869 negative regulation of complement activation, lectin pathway;GO:0001868 regulation of complement activation, lectin pathway;GO:0045916 negative regulation of complement activation				Becaplermin (Tumor necrosis factor binding);Bacitracin (Tumor necrosis factor binding);Ocriplasmin (Tumor necrosis factor binding)	(M183)PID IL6 7 PATHWAY; (M3468)NABA ECM REGULATORS; (M5885)NABA MATRISOME ASSOCIATED	(M5897)HALLMARK IL6 JAK STAT3 SIGNALING; (M5946)HALLMARK COAGULATION	1.0	0.0	0.0	0.0	0.0	1.0	1.0	0.0	1.0	0.0	1.0	1.0	0.0	1.0	0.0	1.0	0.0	0.0	0.0	1.0
AANAT	15	symbol	H. sapiens	15	H. sapiens	AANAT	aralkylamine N-acetyltransferase	GO:0030187 melatonin biosynthetic process;GO:0030186 melatonin metabolic process;GO:0046219 indolalkylamine biosynthetic process		Enzymes/ENZYME proteins/Transferases	Cytosol(Supported)	Coa-S-Trimethylene-Acetyl-Tryptamine (Arylamine n-acetyltransferase activity);Coa-S-Acetyl Tryptamine (Arylamine n-acetyltransferase activity);Coa-S-Acetyl 5-Bromotryptamine (Arylamine n-acetyltransferase activity)			0.0	0.0	0.0	0.0	0.0	0.0	0.0	0.0	0.0	0.0	0.0	0.0	0.0	0.0	0.0	0.0	0.0	0.0	0.0	0.0
ABCA1	19	symbol	H. sapiens	19	H. sapiens	ABCA1	ATP binding cassette subfamily A member 1	GO:0090108 positive regulation of high-density lipoprotein particle assembly;GO:0090107 regulation of high-density lipoprotein particle assembly;GO:0010875 positive regulation of cholesterol efflux		Transporters/Primary Active Transporters	Nucleoplasm;Vesicles(Approved)	Adenosine triphosphate (Syntaxin binding);Glyburide (Syntaxin binding);Probucol (Syntaxin binding)	(M162)PID RXR VDR PATHWAY	(M5910)HALLMARK PROTEIN SECRETION; (M5948)HALLMARK BILE ACID METABOLISM; (M5932)HALLMARK INFLAMMATORY RESPONSE	0.0	0.0	0.0	1.0	0.0	0.0	0.0	1.0	0.0	0.0	0.0	1.0	0.0	0.0	0.0	0.0	0.0	0.0	1.0	0.0
ABCA13	154664	symbol	H. sapiens	154664	H. sapiens	ABCA13	ATP binding cassette subfamily A member 13	GO:0043312 neutrophil degranulation;GO:0002283 neutrophil activation involved in immune response;GO:0042119 neutrophil activation			Centrosome;Cytosol;Vesicles(Approved)				1.0	0.0	0.0	0.0	0.0	0.0	0.0	0.0	0.0	0.0	0.0	0.0	0.0	0.0	0.0	0.0	0.0	0.0	0.0	0.0
ABCA7	10347	symbol	H. sapiens	10347	H. sapiens	ABCA7	ATP binding cassette subfamily A member 7	GO:1902995 positive regulation of phospholipid efflux;GO:1901076 positive regulation of engulfment of apoptotic cell;GO:1902994 regulation of phospholipid efflux		Transporters/Primary Active Transporters	Cell Junctions;Golgi apparatus;Plasma membrane(Supported)				0.0	0.0	0.0	0.0	0.0	0.0	0.0	0.0	0.0	0.0	0.0	1.0	0.0	0.0	0.0	0.0	0.0	0.0	0.0	0.0
ABCC3	8714	symbol	H. sapiens	8714	H. sapiens	ABCC3	ATP binding cassette subfamily C member 3	GO:0015722 canalicular bile acid transport;GO:0015721 bile acid and bile salt transport;GO:0042908 xenobiotic transport		Transporters/Primary Active Transporters	Plasma membrane(Approved)			(M5934)HALLMARK XENOBIOTIC METABOLISM	0.0	0.0	0.0	0.0	0.0	0.0	0.0	0.0	0.0	0.0	0.0	0.0	0.0	0.0	0.0	0.0	0.0	0.0	0.0	0.0
ABHD14B	84836	symbol	H. sapiens	84836	H. sapiens	ABHD14B	abhydrolase domain containing 14B	GO:0050427 3'-phosphoadenosine 5'-phosphosulfate metabolic process;GO:0034035 purine ribonucleoside bisphosphate metabolic process;GO:0033875 ribonucleoside bisphosphate metabolic process			Cytosol;Nucleoli;Nucleus(Supported)				0.0	0.0	0.0	0.0	0.0	0.0	0.0	0.0	0.0	0.0	0.0	0.0	0.0	0.0	0.0	0.0	0.0	0.0	0.0	0.0
ABHD15	116236	symbol	H. sapiens	116236	H. sapiens	ABHD15	abhydrolase domain containing 15	GO:0044255 cellular lipid metabolic process;GO:0006629 lipid metabolic process;GO:0044238 primary metabolic process			Cytosol;Nucleoplasm(Approved)				0.0	0.0	0.0	0.0	0.0	0.0	0.0	0.0	0.0	0.0	0.0	0.0	0.0	0.0	0.0	0.0	0.0	0.0	0.0	0.0
ABTB1	80325	symbol	H. sapiens	80325	H. sapiens	ABTB1	ankyrin repeat and BTB domain containing 1	GO:0006414 translational elongation;GO:0006412 translation;GO:0043043 peptide biosynthetic process			Cytosol(Supported)Nucleoli(Approved)				0.0	0.0	0.0	0.0	0.0	0.0	0.0	0.0	0.0	0.0	0.0	0.0	0.0	0.0	0.0	0.0	0.0	0.0	0.0	0.0
AC055733						None	None	None	None	None	None	None	None	None	nan	nan	nan	nan	nan	nan	nan	nan	nan	nan	nan	nan	nan	nan	nan	nan	nan	nan	nan	nan
1	1	Gene_ID	H. sapiens	1	H. sapiens	A1BG	alpha-1-B glycoprotein	GO:0002576 platelet degranulation;GO:0043312 neutrophil degranulation;GO:0002283 neutrophil activation involved in immune response					(M14532)ST PHOSPHOINOSITIDE 3 KINASE PATHWAY		1.0	0.0	0.0	0.0	0.0	0.0	0.0	0.0	0.0	0.0	0.0	0.0	0.0	0.0	0.0	0.0	0.0	0.0	0.0	1.0
ACADVL	37	symbol	H. sapiens	37	H. sapiens	ACADVL	acyl-CoA dehydrogenase very long chain	GO:0033539 fatty acid beta-oxidation using acyl-CoA dehydrogenase;GO:0046322 negative regulation of fatty acid oxidation;GO:0045717 negative regulation of fatty acid biosynthetic process		Enzymes/ENZYME proteins/Oxidoreductases	Mitochondria(Supported)Nucleus(Approved)Nucleoli(Uncertain)		(M106)PID HNF3B PATHWAY	(M5935)HALLMARK FATTY ACID METABOLISM; (M5936)HALLMARK OXIDATIVE PHOSPHORYLATION	0.0	0.0	0.0	0.0	0.0	0.0	0.0	0.0	0.0	0.0	0.0	0.0	0.0	0.0	0.0	0.0	0.0	0.0	0.0	0.0
ACAP1	9744	symbol	H. sapiens	9744	H. sapiens	ACAP1	ArfGAP with coiled-coil, ankyrin repeat and PH domains 1	GO:0043547 positive regulation of GTPase activity;GO:0043087 regulation of GTPase activity;GO:0051345 positive regulation of hydrolase activity			Golgi apparatus(Approved)		(M86)PID ARF6 PATHWAY; (M67)PID ARF6 TRAFFICKING PATHWAY		0.0	0.0	0.0	0.0	0.0	0.0	0.0	0.0	0.0	0.0	0.0	0.0	0.0	0.0	0.0	0.0	0.0	0.0	0.0	0.0
ACCS	84680	symbol	H. sapiens	84680	H. sapiens	ACCS	1-aminocyclopropane-1-carboxylate synthase homolog (inactive)	GO:0042218 1-aminocyclopropane-1-carboxylate biosynthetic process;GO:0018871 1-aminocyclopropane-1-carboxylate metabolic process;GO:1901607 alpha-amino acid biosynthetic process			Golgi apparatus(Approved)	Vinylglycine (Pyridoxal phosphate binding)			0.0	0.0	0.0	0.0	0.0	0.0	0.0	0.0	0.0	0.0	0.0	0.0	0.0	0.0	0.0	0.0	0.0	0.0	0.0	0.0
ACOX2	8309	symbol	H. sapiens	8309	H. sapiens	ACOX2	acyl-CoA oxidase 2	GO:0033540 fatty acid beta-oxidation using acyl-CoA oxidase;GO:0006699 bile acid biosynthetic process;GO:0006625 protein targeting to peroxisome		Enzymes/ENZYME proteins/Oxidoreductases	Vesicles(Supported)Cytosol(Approved)			(M5946)HALLMARK COAGULATION; (M5907)HALLMARK ESTROGEN RESPONSE LATE; (M5934)HALLMARK XENOBIOTIC METABOLISM	0.0	0.0	0.0	0.0	0.0	0.0	0.0	0.0	0.0	0.0	0.0	0.0	0.0	0.0	0.0	0.0	0.0	0.0	0.0	0.0
ACPP	55	gene_synonym	H. sapiens	55	H. sapiens	ACP3	acid phosphatase 3	GO:0060168 positive regulation of adenosine receptor signaling pathway;GO:0060167 regulation of adenosine receptor signaling pathway;GO:0046085 adenosine metabolic process		Enzymes/ENZYME proteins/Hydrolases		N-Propyl-Tartramic Acid (Thiamine phosphate phosphatase activity);Alpha-Benzyl-Aminobenzyl-Phosphonic Acid (Thiamine phosphate phosphatase activity);Sipuleucel-T (Thiamine phosphate phosphatase activity)			1.0	0.0	0.0	0.0	0.0	0.0	0.0	0.0	0.0	0.0	0.0	0.0	0.0	0.0	0.0	0.0	0.0	0.0	0.0	0.0
ACRBP	84519	symbol	H. sapiens	84519	H. sapiens	ACRBP	acrosin binding protein	GO:0001675 acrosome assembly;GO:0007286 spermatid development;GO:0033363 secretory granule organization			Nucleoplasm;Vesicles(Approved)			(M5951)HALLMARK SPERMATOGENESIS	0.0	0.0	0.0	0.0	0.0	0.0	0.0	0.0	0.0	0.0	0.0	0.0	0.0	0.0	0.0	0.0	0.0	0.0	0.0	0.0
ACSL1	2180	symbol	H. sapiens	2180	H. sapiens	ACSL1	acyl-CoA synthetase long chain family member 1	GO:0035338 long-chain fatty-acyl-CoA biosynthetic process;GO:0044539 long-chain fatty acid import;GO:0036109 alpha-linolenic acid metabolic process		Enzymes/ENZYME proteins/Ligase	Mitochondria;Nucleus(Supported)	Adenosine monophosphate (Long-chain fatty acid-coa ligase activity);Adenosine triphosphate (Long-chain fatty acid-coa ligase activity)		(M5949)HALLMARK PEROXISOME; (M5948)HALLMARK BILE ACID METABOLISM; (M5935)HALLMARK FATTY ACID METABOLISM	0.0	1.0	0.0	0.0	0.0	0.0	0.0	0.0	0.0	0.0	0.0	0.0	0.0	0.0	0.0	0.0	0.0	0.0	0.0	0.0
ACSM3	6296	symbol	H. sapiens	6296	H. sapiens	ACSM3	acyl-CoA synthetase medium chain family member 3	GO:0042632 cholesterol homeostasis;GO:0006637 acyl-CoA metabolic process;GO:0055092 sterol homeostasis		Enzymes/ENZYME proteins/Ligase				(M5935)HALLMARK FATTY ACID METABOLISM	0.0	0.0	0.0	0.0	0.0	0.0	0.0	0.0	0.0	0.0	0.0	0.0	0.0	0.0	0.0	0.0	0.0	0.0	0.0	0.0
ACTA1	58	symbol	H. sapiens	58	H. sapiens	ACTA1	actin alpha 1, skeletal muscle	GO:0043503 skeletal muscle fiber adaptation;GO:0030240 skeletal muscle thin filament assembly;GO:0090131 mesenchyme migration				Latrunculin A (Structural constituent of cytoskeleton);Sucrose (Structural constituent of cytoskeleton);Ulapualide A (Structural constituent of cytoskeleton);Kabiramide C (Structural constituent of cytoskeleton);Jaspisamide A (Structural constituent of cytoskeleton);Tmr (Structural constituent of cytoskeleton);4-Methyl-Histidine (Structural constituent of cytoskeleton);Phosphoaminophosphonic Acid…	(M12)PID RHOA PATHWAY; (M220)PID CASPASE PATHWAY; (M281)PID FAK PATHWAY	(M5909)HALLMARK MYOGENESIS; (M5915)HALLMARK APICAL JUNCTION	0.0	0.0	0.0	0.0	0.0	0.0	0.0	0.0	0.0	0.0	0.0	0.0	0.0	0.0	0.0	0.0	0.0	0.0	0.0	0.0
ACTN1	87	symbol	H. sapiens	87	H. sapiens	ACTN1	actinin alpha 1	GO:0030220 platelet formation;GO:0051639 actin filament network formation;GO:0051764 actin crosslink formation			Focal adhesion sites;Plasma membrane(Approved)		(M165)PID SYNDECAN 4 PATHWAY; (M232)PID ECADHERIN STABILIZATION PATHWAY; (M71)PID ILK PATHWAY	(M5908)HALLMARK ANDROGEN RESPONSE; (M5915)HALLMARK APICAL JUNCTION	1.0	0.0	0.0	0.0	0.0	0.0	0.0	0.0	0.0	0.0	0.0	1.0	1.0	0.0	0.0	0.0	0.0	0.0	1.0	1.0
ADAM12	8038	symbol	H. sapiens	8038	H. sapiens	ADAM12	ADAM metallopeptidase domain 12	GO:0045766 positive regulation of angiogenesis;GO:0007520 myoblast fusion;GO:0045765 regulation of angiogenesis		Transporters/Accessory Factors Involved in Transport	Plasma membrane(Supported)		(M118)PID INTEGRIN A9B1 PATHWAY; (M165)PID SYNDECAN 4 PATHWAY; (M17)PID NOTCH PATHWAY	(M5909)HALLMARK MYOGENESIS; (M5930)HALLMARK EPITHELIAL MESENCHYMAL TRANSITION	0.0	0.0	0.0	0.0	0.0	0.0	0.0	0.0	0.0	0.0	0.0	1.0	0.0	0.0	0.0	1.0	0.0	0.0	0.0	0.0
ADAM28	10863	symbol	H. sapiens	10863	H. sapiens	ADAM28	ADAM metallopeptidase domain 28	GO:0007283 spermatogenesis;GO:0048232 male gamete generation;GO:0007276 gamete generation		Transporters/Accessory Factors Involved in Transport	Plasma membrane(Supported)Mitochondria(Approved)	N-[(Furan-2-Yl)Carbonyl]-(S)-Leucyl-(R)-[1-Amino-2(1h-Indol-3-Yl)Ethyl]-Phosphonic Acid (Zinc ion binding);Furoyl-Leucine (Zinc ion binding);GM6001 (Zinc ion binding);2-(Thiomethylene)-4-Methylpentanoic Acid (Zinc ion binding);Pyroglutamic Acid (Zinc ion binding);Batimastat (Zinc ion binding);(2R,3R)-N^1^-[(1S)-2,2-DIMETHYL-1-(METHYLCARBAMOYL)PROPYL]-N^4^-HYDROXY-2-(2-METHYLPROPYL)-3-{[(1,3-THIAZ…	(M277)PID INTEGRIN A4B1 PATHWAY; (M3468)NABA ECM REGULATORS; (M5885)NABA MATRISOME ASSOCIATED		0.0	0.0	0.0	0.0	0.0	0.0	0.0	0.0	0.0	0.0	0.0	0.0	0.0	0.0	0.0	1.0	0.0	0.0	0.0	0.0
ADAM32	203102	symbol	H. sapiens	203102	H. sapiens	ADAM32	ADAM metallopeptidase domain 32	GO:0006508 proteolysis;GO:0019538 protein metabolic process;GO:1901564 organonitrogen compound metabolic process			Nucleus;Vesicles(Approved)		(M3468)NABA ECM REGULATORS; (M5885)NABA MATRISOME ASSOCIATED; (M5889)NABA MATRISOME		0.0	0.0	0.0	0.0	0.0	0.0	0.0	0.0	0.0	0.0	0.0	0.0	0.0	0.0	0.0	1.0	0.0	0.0	0.0	0.0
ADAM8	101	symbol	H. sapiens	101	H. sapiens	ADAM8	ADAM metallopeptidase domain 8	GO:2000415 positive regulation of fibronectin-dependent thymocyte migration;GO:2000413 regulation of fibronectin-dependent thymocyte migration;GO:0072681 fibronectin-dependent thymocyte migration		CD markers			(M118)PID INTEGRIN A9B1 PATHWAY; (M3468)NABA ECM REGULATORS; (M5885)NABA MATRISOME ASSOCIATED	(M5953)HALLMARK KRAS SIGNALING UP	1.0	0.0	1.0	1.0	1.0	0.0	0.0	0.0	1.0	0.0	0.0	1.0	0.0	1.0	0.0	1.0	0.0	0.0	0.0	0.0
ADAMTS1	9510	symbol	H. sapiens	9510	H. sapiens	ADAMTS1	ADAM metallopeptidase with thrombospondin type 1 motif 1	GO:1904754 positive regulation of vascular associated smooth muscle cell migration;GO:0001542 ovulation from ovarian follicle;GO:1904752 regulation of vascular associated smooth muscle cell migration					(M3468)NABA ECM REGULATORS; (M5885)NABA MATRISOME ASSOCIATED; (M5889)NABA MATRISOME	(M5908)HALLMARK ANDROGEN RESPONSE	0.0	0.0	0.0	0.0	1.0	0.0	0.0	0.0	0.0	0.0	1.0	1.0	0.0	0.0	0.0	1.0	0.0	0.0	0.0	0.0
ADAMTS14	140766	symbol	H. sapiens	140766	H. sapiens	ADAMTS14	ADAM metallopeptidase with thrombospondin type 1 motif 14	GO:0030199 collagen fibril organization;GO:0030574 collagen catabolic process;GO:0032963 collagen metabolic process			Cytosol(Uncertain)		(M3468)NABA ECM REGULATORS; (M5885)NABA MATRISOME ASSOCIATED; (M5889)NABA MATRISOME		0.0	0.0	0.0	0.0	0.0	0.0	0.0	0.0	0.0	0.0	0.0	1.0	0.0	0.0	0.0	1.0	0.0	0.0	0.0	0.0
ADAMTS2	9509	symbol	H. sapiens	9509	H. sapiens	ADAMTS2	ADAM metallopeptidase with thrombospondin type 1 motif 2	GO:0030199 collagen fibril organization;GO:0030574 collagen catabolic process;GO:0030324 lung development		Enzymes/ENZYME proteins/Hydrolases	Plasma membrane;Vesicles(Approved)		(M3468)NABA ECM REGULATORS; (M5885)NABA MATRISOME ASSOCIATED; (M5889)NABA MATRISOME		0.0	0.0	0.0	0.0	0.0	0.0	0.0	0.0	0.0	0.0	0.0	1.0	0.0	0.0	0.0	1.0	0.0	0.0	0.0	0.0
ADAMTSL4	54507	symbol	H. sapiens	54507	H. sapiens	ADAMTSL4	ADAMTS like 4	GO:0002064 epithelial cell development;GO:0043065 positive regulation of apoptotic process;GO:0030198 extracellular matrix organization			Cytosol;Plasma membrane(Approved)		(M3468)NABA ECM REGULATORS; (M5885)NABA MATRISOME ASSOCIATED; (M5889)NABA MATRISOME		0.0	0.0	0.0	0.0	0.0	0.0	0.0	0.0	0.0	0.0	0.0	1.0	0.0	0.0	0.0	1.0	0.0	0.0	0.0	0.0
ADAP2	55803	symbol	H. sapiens	55803	H. sapiens	ADAP2	ArfGAP with dual PH domains 2	GO:0043547 positive regulation of GTPase activity;GO:0048017 inositol lipid-mediated signaling;GO:0043087 regulation of GTPase activity							0.0	0.0	0.0	0.0	0.0	0.0	0.0	0.0	0.0	0.0	0.0	0.0	0.0	0.0	0.0	0.0	0.0	0.0	0.0	0.0
ADPGK	83440	symbol	H. sapiens	83440	H. sapiens	ADPGK	ADP dependent glucokinase	GO:0061621 canonical glycolysis;GO:0061620 glycolytic process through glucose-6-phosphate;GO:0061615 glycolytic process through fructose-6-phosphate		Enzymes/ENZYME proteins/Transferases	Centrosome(Approved)				0.0	0.0	0.0	0.0	0.0	0.0	0.0	0.0	0.0	0.0	0.0	0.0	0.0	0.0	0.0	0.0	0.0	0.0	0.0	0.0
ADPRH	141	symbol	H. sapiens	141	H. sapiens	ADPRH	ADP-ribosylarginine hydrolase	GO:0051725 protein de-ADP-ribosylation;GO:0090630 activation of GTPase activity;GO:0043547 positive regulation of GTPase activity		Enzymes/ENZYME proteins/Hydrolases	Nuclear membrane;Nucleus(Approved)				0.0	0.0	0.0	0.0	0.0	0.0	0.0	0.0	0.0	0.0	0.0	0.0	0.0	0.0	0.0	0.0	0.0	0.0	0.0	0.0
AEBP1	165	symbol	H. sapiens	165	H. sapiens	AEBP1	AE binding protein 1	GO:1904026 regulation of collagen fibril organization;GO:1903053 regulation of extracellular matrix organization;GO:0030199 collagen fibril organization		Enzymes/Peptidases/Metallopeptidases	Vesicles(Supported)Cytosol;Nucleoplasm(Approved)		(M3008)NABA ECM GLYCOPROTEINS; (M5884)NABA CORE MATRISOME; (M5889)NABA MATRISOME	(M5909)HALLMARK MYOGENESIS	0.0	0.0	0.0	0.0	0.0	0.0	0.0	0.0	0.0	0.0	0.0	1.0	0.0	0.0	0.0	0.0	0.0	0.0	0.0	0.0
AFP	174	symbol	H. sapiens	174	H. sapiens	AFP	alpha fetoprotein	GO:0001542 ovulation from ovarian follicle;GO:0042448 progesterone metabolic process;GO:0030728 ovulation			Cytosol(Uncertain)		(M106)PID HNF3B PATHWAY; (M19)PID P73PATHWAY; (M115)PID REG GR PATHWAY		0.0	0.0	0.0	0.0	0.0	0.0	0.0	0.0	0.0	0.0	0.0	0.0	0.0	0.0	0.0	0.0	0.0	0.0	0.0	0.0
AGBL2	79841	symbol	H. sapiens	79841	H. sapiens	AGBL2	ATP/GTP binding protein like 2	GO:0035610 protein side chain deglutamylation;GO:0035608 protein deglutamylation;GO:0018200 peptidyl-glutamic acid modification		Enzymes/Peptidases/Metallopeptidases					0.0	0.0	0.0	0.0	0.0	0.0	0.0	0.0	0.0	0.0	0.0	0.0	0.0	0.0	0.0	0.0	0.0	0.0	0.0	0.0
AGPAT9	79888	gene_synonym	H. sapiens	79888	H. sapiens	LPCAT1	lysophosphatidylcholine acyltransferase 1	GO:2001246 negative regulation of phosphatidylcholine biosynthetic process;GO:2001245 regulation of phosphatidylcholine biosynthetic process;GO:0036148 phosphatidylglycerol acyl-chain remodeling		Enzymes/ENZYME proteins/Transferases	Endoplasmic reticulum;Lipid droplets(Supported)				1.0	0.0	0.0	0.0	0.0	0.0	0.0	0.0	0.0	0.0	0.0	0.0	0.0	0.0	0.0	0.0	0.0	0.0	0.0	0.0
AHNAK	79026	symbol	H. sapiens	79026	H. sapiens	AHNAK	AHNAK nucleoprotein	GO:1901385 regulation of voltage-gated calcium channel activity;GO:1901019 regulation of calcium ion transmembrane transporter activity;GO:1903169 regulation of calcium ion transmembrane transport			Cytosol;Plasma membrane(Supported)			(M5947)HALLMARK IL2 STAT5 SIGNALING	0.0	0.0	0.0	0.0	0.0	0.0	0.0	0.0	0.0	0.0	0.0	0.0	0.0	0.0	0.0	0.0	0.0	0.0	0.0	0.0
AHNAK2	113146	symbol	H. sapiens	113146	H. sapiens	AHNAK2	AHNAK nucleoprotein 2	GO:0001778 plasma membrane repair;GO:0007009 plasma membrane organization;GO:0043484 regulation of RNA splicing			Cytosol;Plasma membrane(Enhanced)				0.0	0.0	0.0	0.0	0.0	0.0	0.0	0.0	0.0	0.0	0.0	0.0	0.0	0.0	0.0	0.0	0.0	0.0	0.0	1.0
AHSA2	130872	gene_synonym	H. sapiens	130872	H. sapiens	AHSA2P	activator of HSP90 ATPase homolog 2, pseudogene	GO:0032781 positive regulation of ATPase activity;GO:0043462 regulation of ATPase activity;GO:0051345 positive regulation of hydrolase activity			Cytokinetic bridge;Microtubules;Vesicles(Approved)				0.0	0.0	0.0	0.0	0.0	0.0	0.0	0.0	0.0	0.0	0.0	0.0	0.0	0.0	0.0	0.0	0.0	0.0	0.0	0.0
AIM1	9212	gene_synonym	H. sapiens	9212	H. sapiens	AURKB	aurora kinase B	GO:1905116 positive regulation of lateral attachment of mitotic spindle microtubules to kinetochore;GO:1905115 regulation of lateral attachment of mitotic spindle microtubules to kinetochore;GO:1902425 positive regulation of attachment of mitotic spindle microtubules to kinetochore	Other	Enzymes/{ENZYME proteins/Transferases,Kinases}	Midbody;Nucleoplasm(Enhanced)	HESPERIDIN (Protein serine/threonine/tyrosine kinase activity);AT9283 (Protein serine/threonine/tyrosine kinase activity);N~6~-cyclohexyl-N~2~-(4-morpholin-4-ylphenyl)-9H-purine-2,6-diamine (Protein serine/threonine/tyrosine kinase activity)	(M242)PID AURORA A PATHWAY; (M14)PID AURORA B PATHWAY; (M176)PID FOXM1 PATHWAY	(M5925)HALLMARK E2F TARGETS; (M5901)HALLMARK G2M CHECKPOINT	0.0	0.0	0.0	0.0	0.0	0.0	0.0	0.0	0.0	0.0	0.0	0.0	0.0	0.0	0.0	0.0	0.0	0.0	0.0	0.0
AIRE	326	symbol	H. sapiens	326	H. sapiens	AIRE	autoimmune regulator	GO:0002458 peripheral T cell tolerance induction;GO:0045060 negative thymic T cell selection;GO:2000410 regulation of thymocyte migration		Transcription factors					0.0	0.0	1.0	0.0	1.0	1.0	0.0	0.0	0.0	0.0	0.0	0.0	0.0	0.0	0.0	0.0	0.0	0.0	0.0	0.0
AKR1B10	57016	symbol	H. sapiens	57016	H. sapiens	AKR1B10	aldo-keto reductase family 1 member B10	GO:0016488 farnesol catabolic process;GO:0016107 sesquiterpenoid catabolic process;GO:0016487 farnesol metabolic process			Cytosol;Plasma membrane(Supported)	Tolrestat (Retinal dehydrogenase activity);2'-Monophosphoadenosine 5'-Diphosphoribose (Retinal dehydrogenase activity);3,4-DIHYDRO-4-OXO-3-((5-TRIFLUOROMETHYL-2-BENZOTHIAZOLYL)METHYL)-1-PHTHALAZINE ACETIC ACID (Retinal dehydrogenase activity)		(M5956)HALLMARK KRAS SIGNALING DN	0.0	0.0	0.0	0.0	0.0	0.0	0.0	0.0	0.0	0.0	0.0	0.0	0.0	0.0	0.0	0.0	0.0	0.0	0.0	0.0
ALDH3B1	221	symbol	H. sapiens	221	H. sapiens	ALDH3B1	aldehyde dehydrogenase 3 family member B1	GO:0006068 ethanol catabolic process;GO:0034310 primary alcohol catabolic process;GO:0006067 ethanol metabolic process		Enzymes/ENZYME proteins/Oxidoreductases		NADH (Aldehyde dehydrogenase [nad(p)+] activity)		(M5906)HALLMARK ESTROGEN RESPONSE EARLY; (M5907)HALLMARK ESTROGEN RESPONSE LATE	1.0	0.0	0.0	0.0	0.0	0.0	0.0	0.0	0.0	0.0	0.0	0.0	0.0	0.0	0.0	0.0	0.0	0.0	0.0	0.0
ALOX5	240	symbol	H. sapiens	240	H. sapiens	ALOX5	arachidonate 5-lipoxygenase	GO:2001301 lipoxin biosynthetic process;GO:0002540 leukotriene production involved in inflammatory response;GO:2001300 lipoxin metabolic process		Enzymes/ENZYME proteins/Oxidoreductases	Nucleoplasm(Supported)	Vitamin E (Iron ion binding);Masoprocol (Iron ion binding);Aminosalicylic Acid (Iron ion binding);Mesalazine (Iron ion binding);Montelukast (Iron ion binding);Diclofenac (Iron ion binding);Diethylcarbamazine (Iron ion binding);Zileuton (Iron ion binding);Sulfasalazine (Iron ion binding);Meclofenamic acid (Iron ion binding);Balsalazide (Iron ion binding);Minocycline (Iron ion binding);Hyperforin (…			1.0	1.0	0.0	0.0	1.0	0.0	0.0	0.0	0.0	0.0	0.0	0.0	1.0	1.0	0.0	0.0	0.0	0.0	0.0	0.0
ALOX5AP	241	symbol	H. sapiens	241	H. sapiens	ALOX5AP	arachidonate 5-lipoxygenase activating protein	GO:2001301 lipoxin biosynthetic process;GO:2001300 lipoxin metabolic process;GO:0019370 leukotriene biosynthetic process				DG031 (Protein n-terminus binding);AM103 (Protein n-terminus binding)			0.0	0.0	0.0	0.0	0.0	0.0	0.0	0.0	0.0	0.0	0.0	0.0	0.0	0.0	0.0	0.0	0.0	0.0	0.0	0.0
ALPK1	80216	symbol	H. sapiens	80216	H. sapiens	ALPK1	alpha kinase 1	GO:0002753 cytoplasmic pattern recognition receptor signaling pathway;GO:0002221 pattern recognition receptor signaling pathway;GO:0002758 innate immune response-activating signal transduction	Atypical: Alpha-type protein kinase family	Enzymes/Kinases/Atypical kinases	Centrosome(Approved)				0.0	0.0	0.0	0.0	0.0	0.0	1.0	0.0	1.0	0.0	0.0	0.0	0.0	0.0	0.0	0.0	0.0	0.0	0.0	0.0
ALS2CL	259173	symbol	H. sapiens	259173	H. sapiens	ALS2CL	ALS2 C-terminal like	GO:0007032 endosome organization;GO:0043547 positive regulation of GTPase activity;GO:0043087 regulation of GTPase activity							0.0	0.0	0.0	0.0	0.0	0.0	0.0	0.0	0.0	0.0	0.0	0.0	0.0	0.0	0.0	0.0	0.0	0.0	0.0	0.0
AMDHD2	51005	symbol	H. sapiens	51005	H. sapiens	AMDHD2	amidohydrolase domain containing 2	GO:0006046 N-acetylglucosamine catabolic process;GO:0019262 N-acetylneuraminate catabolic process;GO:0006048 UDP-N-acetylglucosamine biosynthetic process		Enzymes/ENZYME proteins/Hydrolases	Cytosol;Nucleoli(Approved)				0.0	0.0	0.0	0.0	0.0	0.0	0.0	0.0	0.0	0.0	0.0	0.0	0.0	0.0	0.0	0.0	0.0	0.0	0.0	0.0
AMICA1	120425	gene_synonym	H. sapiens	120425	H. sapiens	JAML	junction adhesion molecule like	GO:0072672 neutrophil extravasation;GO:0035696 monocyte extravasation;GO:0060054 positive regulation of epithelial cell proliferation involved in wound healing					(M277)PID INTEGRIN A4B1 PATHWAY		0.0	0.0	1.0	0.0	1.0	0.0	0.0	0.0	0.0	0.0	0.0	0.0	0.0	0.0	1.0	0.0	0.0	0.0	0.0	1.0
AMPD3	272	symbol	H. sapiens	272	H. sapiens	AMPD3	adenosine monophosphate deaminase 3	GO:0006196 AMP catabolic process;GO:0032264 IMP salvage;GO:0009169 purine ribonucleoside monophosphate catabolic process		Enzymes/ENZYME proteins/Hydrolases	Nuclear membrane(Enhanced)			(M5891)HALLMARK HYPOXIA	1.0	0.0	0.0	0.0	0.0	0.0	0.0	0.0	0.0	0.0	0.0	0.0	0.0	0.0	0.0	0.0	0.0	0.0	0.0	0.0
ANG	283	symbol	H. sapiens	283	H. sapiens	ANG	angiogenin	GO:0032431 activation of phospholipase A2 activity;GO:0032430 positive regulation of phospholipase A2 activity;GO:0006651 diacylglycerol biosynthetic process				Pyroglutamic Acid (Rrna binding);Citric Acid (Rrna binding)		(M5946)HALLMARK COAGULATION; (M5921)HALLMARK COMPLEMENT; (M5937)HALLMARK GLYCOLYSIS	0.0	0.0	0.0	1.0	0.0	0.0	0.0	0.0	0.0	0.0	1.0	0.0	0.0	0.0	0.0	0.0	0.0	0.0	0.0	0.0
ANKRD13D	338692	symbol	H. sapiens	338692	H. sapiens	ANKRD13D	ankyrin repeat domain 13D	GO:0002091 negative regulation of receptor internalization;GO:0048261 negative regulation of receptor-mediated endocytosis;GO:0002090 regulation of receptor internalization			Mitochondria;Nucleus(Approved)				0.0	0.0	0.0	0.0	0.0	0.0	0.0	0.0	0.0	0.0	0.0	0.0	0.0	0.0	0.0	0.0	0.0	0.0	0.0	0.0
ANKRD29	147463	symbol	H. sapiens	147463	H. sapiens	ANKRD29	ankyrin repeat domain 29				Nuclear bodies;Nucleoplasm(Approved)				0.0	0.0	0.0	0.0	0.0	0.0	0.0	0.0	0.0	0.0	0.0	0.0	0.0	0.0	0.0	0.0	0.0	0.0	0.0	0.0
ANO9	338440	symbol	H. sapiens	338440	H. sapiens	ANO9	anoctamin 9	GO:1902939 negative regulation of intracellular calcium activated chloride channel activity;GO:1903796 negative regulation of inorganic anion transmembrane transport;GO:1902938 regulation of intracellular calcium activated chloride channel activity		Transporters/Transporter channels and pores	Golgi apparatus(Uncertain)				0.0	0.0	0.0	0.0	0.0	0.0	0.0	0.0	0.0	0.0	0.0	0.0	0.0	0.0	0.0	0.0	0.0	0.0	0.0	0.0
ANPEP	290	symbol	H. sapiens	290	H. sapiens	ANPEP	alanyl aminopeptidase, membrane	GO:0046718 viral entry into host cell;GO:0030260 entry into host cell;GO:0043312 neutrophil degranulation		CD markers;Enzymes/{ENZYME proteins/Hydrolases,Peptidases/Metallopeptidases}	Plasma membrane(Supported)	Ezetimibe (Zinc ion binding);Icatibant (Zinc ion binding)	(M195)PID CMYB PATHWAY	(M5930)HALLMARK EPITHELIAL MESENCHYMAL TRANSITION	1.0	0.0	0.0	0.0	0.0	0.0	0.0	0.0	0.0	0.0	0.0	0.0	1.0	0.0	0.0	0.0	0.0	0.0	0.0	0.0
ANXA11	311	symbol	H. sapiens	311	H. sapiens	ANXA11	annexin A11	GO:0032506 cytokinetic process;GO:0051592 response to calcium ion;GO:0006909 phagocytosis		Transporters/Primary Active Transporters	Cytosol;Nucleoplasm(Supported)		(M5880)NABA ECM AFFILIATED; (M5885)NABA MATRISOME ASSOCIATED; (M5889)NABA MATRISOME		0.0	0.0	0.0	0.0	0.0	0.0	0.0	0.0	0.0	0.0	0.0	0.0	0.0	0.0	0.0	1.0	0.0	0.0	0.0	0.0
ANXA2	302	symbol	H. sapiens	302	H. sapiens	ANXA2	annexin A2	GO:0052362 catabolism by host of symbiont protein;GO:1905602 positive regulation of receptor-mediated endocytosis involved in cholesterol transport;GO:0052417 metabolism by host of symbiont protein		Transporters/Transporter channels and pores		Tenecteplase (S100 protein binding)	(M5880)NABA ECM AFFILIATED; (M5885)NABA MATRISOME ASSOCIATED; (M5889)NABA MATRISOME	(M5942)HALLMARK UV RESPONSE DN; (M5891)HALLMARK HYPOXIA	1.0	1.0	1.0	0.0	0.0	0.0	0.0	0.0	0.0	0.0	0.0	0.0	0.0	0.0	0.0	1.0	0.0	0.0	1.0	1.0
AOAH	313	symbol	H. sapiens	313	H. sapiens	AOAH	acyloxyacyl hydrolase	GO:0009104 lipopolysaccharide catabolic process;GO:0008653 lipopolysaccharide metabolic process;GO:0044247 cellular polysaccharide catabolic process		Enzymes/ENZYME proteins/Hydrolases					0.0	0.0	0.0	0.0	0.0	0.0	0.0	0.0	0.0	0.0	0.0	0.0	0.0	0.0	0.0	0.0	0.0	0.0	0.0	0.0
AP1G2	8906	symbol	H. sapiens	8906	H. sapiens	AP1G2	adaptor related protein complex 1 subunit gamma 2	GO:0016032 viral process;GO:0044403 symbiont process;GO:0006886 intracellular protein transport							0.0	0.0	0.0	0.0	0.0	0.0	0.0	0.0	0.0	0.0	0.0	0.0	0.0	0.0	0.0	0.0	0.0	0.0	0.0	0.0
APBB3	10307	symbol	H. sapiens	10307	H. sapiens	APBB3	amyloid beta precursor protein binding family B member 3	GO:0006355 regulation of transcription, DNA-templated;GO:1903506 regulation of nucleic acid-templated transcription;GO:0006351 transcription, DNA-templated			Cytosol(Supported)Actin filaments(Approved)				0.0	0.0	0.0	0.0	0.0	0.0	0.0	0.0	0.0	0.0	0.0	0.0	0.0	0.0	0.0	0.0	0.0	0.0	0.0	0.0
APCDD1L	164284	symbol	H. sapiens	164284	H. sapiens	APCDD1L	APC down-regulated 1 like	GO:0030178 negative regulation of Wnt signaling pathway;GO:0030111 regulation of Wnt signaling pathway;GO:0016055 Wnt signaling pathway			Mitochondria(Uncertain)				0.0	0.0	0.0	0.0	0.0	0.0	0.0	0.0	0.0	0.0	0.0	0.0	0.0	0.0	0.0	0.0	0.0	0.0	0.0	0.0
APOBEC3A	200315	symbol	H. sapiens	200315	H. sapiens	APOBEC3A	apolipoprotein B mRNA editing enzyme catalytic subunit 3A	GO:0045869 negative regulation of single stranded viral RNA replication via double stranded DNA intermediate;GO:0009972 cytidine deamination;GO:0044355 clearance of foreign intracellular DNA			Nucleoplasm(Uncertain)				0.0	0.0	0.0	0.0	0.0	0.0	0.0	0.0	0.0	0.0	0.0	0.0	0.0	0.0	0.0	0.0	0.0	0.0	0.0	0.0
APOBEC3C	27350	symbol	H. sapiens	27350	H. sapiens	APOBEC3C	apolipoprotein B mRNA editing enzyme catalytic subunit 3C	GO:0045869 negative regulation of single stranded viral RNA replication via double stranded DNA intermediate;GO:0009972 cytidine deamination;GO:0006216 cytidine catabolic process			Intermediate filaments(Approved)				0.0	0.0	0.0	0.0	0.0	0.0	0.0	0.0	0.0	0.0	0.0	0.0	0.0	0.0	0.0	0.0	0.0	0.0	0.0	0.0
APOBEC3D	140564	symbol	H. sapiens	140564	H. sapiens	APOBEC3D	apolipoprotein B mRNA editing enzyme catalytic subunit 3D	GO:0045869 negative regulation of single stranded viral RNA replication via double stranded DNA intermediate;GO:0009972 cytidine deamination;GO:0006216 cytidine catabolic process							0.0	0.0	0.0	0.0	0.0	0.0	0.0	0.0	0.0	0.0	0.0	0.0	0.0	0.0	0.0	0.0	0.0	0.0	0.0	0.0
APOBEC3F	200316	symbol	H. sapiens	200316	H. sapiens	APOBEC3F	apolipoprotein B mRNA editing enzyme catalytic subunit 3F	GO:0045869 negative regulation of single stranded viral RNA replication via double stranded DNA intermediate;GO:0009972 cytidine deamination;GO:0006216 cytidine catabolic process			Cytosol;Nucleoplasm(Uncertain)			(M5921)HALLMARK COMPLEMENT	0.0	0.0	0.0	0.0	0.0	1.0	0.0	0.0	0.0	0.0	0.0	0.0	0.0	0.0	0.0	0.0	0.0	0.0	0.0	0.0
APOBEC3H	164668	symbol	H. sapiens	164668	H. sapiens	APOBEC3H	apolipoprotein B mRNA editing enzyme catalytic subunit 3H	GO:0045869 negative regulation of single stranded viral RNA replication via double stranded DNA intermediate;GO:0009972 cytidine deamination;GO:0006216 cytidine catabolic process							0.0	0.0	0.0	0.0	0.0	0.0	0.0	0.0	0.0	0.0	0.0	0.0	0.0	0.0	0.0	0.0	0.0	0.0	0.0	0.0
APOBR	55911	symbol	H. sapiens	55911	H. sapiens	APOBR	apolipoprotein B receptor	GO:0034447 very-low-density lipoprotein particle clearance;GO:0034381 plasma lipoprotein particle clearance;GO:0006641 triglyceride metabolic process							0.0	0.0	0.0	0.0	0.0	0.0	0.0	0.0	0.0	0.0	0.0	0.0	0.0	0.0	0.0	0.0	0.0	0.0	0.0	0.0
APOL1	8542	symbol	H. sapiens	8542	H. sapiens	APOL1	apolipoprotein L1	GO:0051838 cytolysis by host of symbiont cells;GO:0051801 cytolysis in other organism involved in symbiotic interaction;GO:0051873 killing by host of symbiont cells							0.0	0.0	0.0	0.0	0.0	0.0	0.0	0.0	0.0	0.0	0.0	0.0	0.0	0.0	0.0	0.0	0.0	0.0	0.0	0.0
APOL2	23780	symbol	H. sapiens	23780	H. sapiens	APOL2	apolipoprotein L2	GO:0006953 acute-phase response;GO:0060135 maternal process involved in female pregnancy;GO:0008203 cholesterol metabolic process			Cytosol;Nuclear bodies;Nucleoplasm(Approved)				0.0	0.0	0.0	0.0	0.0	0.0	0.0	0.0	0.0	0.0	0.0	0.0	0.0	0.0	0.0	0.0	0.0	0.0	0.0	0.0
APOL3	80833	symbol	H. sapiens	80833	H. sapiens	APOL3	apolipoprotein L3	GO:0043123 positive regulation of I-kappaB kinase/NF-kappaB signaling;GO:0043122 regulation of I-kappaB kinase/NF-kappaB signaling;GO:0007249 I-kappaB kinase/NF-kappaB signaling			Mitochondria;Nuclear bodies(Approved)				0.0	0.0	0.0	0.0	0.0	0.0	0.0	0.0	0.0	0.0	0.0	0.0	0.0	0.0	0.0	0.0	0.0	0.0	0.0	0.0
APOL6	80830	symbol	H. sapiens	80830	H. sapiens	APOL6	apolipoprotein L6	GO:0042157 lipoprotein metabolic process;GO:0006869 lipid transport;GO:0010876 lipid localization			Nuclear bodies;Nucleoplasm(Supported)Cytosol(Approved)			(M5913)HALLMARK INTERFERON GAMMA RESPONSE	0.0	0.0	0.0	0.0	0.0	0.0	0.0	0.0	0.0	0.0	0.0	0.0	0.0	0.0	0.0	0.0	0.0	0.0	0.0	0.0
AQP9	366	symbol	H. sapiens	366	H. sapiens	AQP9	aquaporin 9	GO:0015722 canalicular bile acid transport;GO:1904823 purine nucleobase transmembrane transport;GO:0071918 urea transmembrane transport						(M5948)HALLMARK BILE ACID METABOLISM; (M5932)HALLMARK INFLAMMATORY RESPONSE; (M5934)HALLMARK XENOBIOTIC METABOLISM	0.0	0.0	0.0	0.0	0.0	0.0	0.0	0.0	0.0	0.0	0.0	0.0	0.0	0.0	0.0	0.0	0.0	0.0	0.0	0.0
AREG	374	symbol	H. sapiens	374	H. sapiens	AREG	amphiregulin	GO:0060598 dichotomous subdivision of terminal units involved in mammary gland duct morphogenesis;GO:0060750 epithelial cell proliferation involved in mammary gland duct elongation;GO:0060744 mammary gland branching involved in thelarche			Mitochondria(Approved)		(M201)PID ERBB NETWORK PATHWAY; (M5883)NABA SECRETED FACTORS; (M5885)NABA MATRISOME ASSOCIATED	(M5906)HALLMARK ESTROGEN RESPONSE EARLY; (M5930)HALLMARK EPITHELIAL MESENCHYMAL TRANSITION; (M5907)HALLMARK ESTROGEN RESPONSE LATE	0.0	0.0	0.0	0.0	0.0	0.0	0.0	0.0	0.0	0.0	0.0	0.0	0.0	0.0	0.0	1.0	0.0	0.0	1.0	0.0
ARHGAP18	93663	symbol	H. sapiens	93663	H. sapiens	ARHGAP18	Rho GTPase activating protein 18	GO:0030833 regulation of actin filament polymerization;GO:0008064 regulation of actin polymerization or depolymerization;GO:0030041 actin filament polymerization			Cytosol;Nuclear speckles;Plasma membrane(Approved)				0.0	0.0	0.0	0.0	0.0	0.0	0.0	0.0	0.0	0.0	0.0	0.0	0.0	0.0	0.0	0.0	0.0	0.0	0.0	0.0
ARHGAP26	23092	symbol	H. sapiens	23092	H. sapiens	ARHGAP26	Rho GTPase activating protein 26	GO:0043547 positive regulation of GTPase activity;GO:0051056 regulation of small GTPase mediated signal transduction;GO:0043087 regulation of GTPase activity			Cytosol(Approved)		(M281)PID FAK PATHWAY; (M3270)ST INTEGRIN SIGNALING PATHWAY		0.0	0.0	0.0	0.0	0.0	0.0	0.0	0.0	0.0	0.0	0.0	0.0	0.0	0.0	0.0	0.0	0.0	0.0	0.0	0.0
ARHGAP27	201176	symbol	H. sapiens	201176	H. sapiens	ARHGAP27	Rho GTPase activating protein 27	GO:0043547 positive regulation of GTPase activity;GO:0006898 receptor-mediated endocytosis;GO:0043087 regulation of GTPase activity			Cytosol;Nucleus(Supported)			(M5893)HALLMARK MITOTIC SPINDLE	0.0	0.0	0.0	0.0	0.0	0.0	0.0	0.0	0.0	0.0	0.0	0.0	0.0	0.0	0.0	0.0	0.0	0.0	0.0	0.0
ARHGAP29	9411	symbol	H. sapiens	9411	H. sapiens	ARHGAP29	Rho GTPase activating protein 29	GO:0007266 Rho protein signal transduction;GO:0043547 positive regulation of GTPase activity;GO:0051056 regulation of small GTPase mediated signal transduction			Centrosome;Cytosol;Nucleus;Plasma membrane(Approved)			(M5893)HALLMARK MITOTIC SPINDLE	0.0	0.0	0.0	0.0	0.0	0.0	0.0	0.0	0.0	0.0	0.0	0.0	0.0	0.0	0.0	0.0	0.0	0.0	0.0	0.0
ARHGAP30	257106	symbol	H. sapiens	257106	H. sapiens	ARHGAP30	Rho GTPase activating protein 30	GO:0043547 positive regulation of GTPase activity;GO:0051056 regulation of small GTPase mediated signal transduction;GO:0043087 regulation of GTPase activity			Vesicles(Supported)				0.0	0.0	0.0	0.0	0.0	0.0	0.0	0.0	0.0	0.0	0.0	0.0	0.0	0.0	0.0	0.0	0.0	0.0	0.0	0.0
ARHGAP4	393	symbol	H. sapiens	393	H. sapiens	ARHGAP4	Rho GTPase activating protein 4	GO:0010764 negative regulation of fibroblast migration;GO:0030517 negative regulation of axon extension;GO:0050771 negative regulation of axonogenesis			Focal adhesion sites(Approved)Nucleoplasm(Uncertain)		(M5193)SIG CHEMOTAXIS; (M68)PID RHOA REG PATHWAY	(M5893)HALLMARK MITOTIC SPINDLE	0.0	0.0	0.0	0.0	0.0	0.0	0.0	0.0	0.0	0.0	0.0	0.0	0.0	0.0	0.0	0.0	0.0	0.0	1.0	0.0
ARHGAP9	64333	symbol	H. sapiens	64333	H. sapiens	ARHGAP9	Rho GTPase activating protein 9	GO:0043312 neutrophil degranulation;GO:0002283 neutrophil activation involved in immune response;GO:0042119 neutrophil activation					(M241)PID RAC1 REG PATHWAY; (M68)PID RHOA REG PATHWAY		1.0	0.0	0.0	0.0	0.0	0.0	0.0	0.0	0.0	0.0	0.0	0.0	0.0	0.0	0.0	0.0	0.0	0.0	0.0	0.0
ARHGDIB	397	symbol	H. sapiens	397	H. sapiens	ARHGDIB	Rho GDP dissociation inhibitor beta	GO:1901164 negative regulation of trophoblast cell migration;GO:1901163 regulation of trophoblast cell migration;GO:0071461 cellular response to redox state			Cytosol(Supported)		(M68)PID RHOA REG PATHWAY; (M220)PID CASPASE PATHWAY		0.0	0.0	1.0	0.0	0.0	0.0	0.0	0.0	0.0	0.0	1.0	0.0	0.0	0.0	0.0	0.0	0.0	0.0	0.0	0.0
ARHGEF1	9138	symbol	H. sapiens	9138	H. sapiens	ARHGEF1	Rho guanine nucleotide exchange factor 1	GO:0007266 Rho protein signal transduction;GO:0043547 positive regulation of GTPase activity;GO:0051056 regulation of small GTPase mediated signal transduction			Cytosol(Enhanced)Plasma membrane(Supported)		(M238)PID THROMBIN PAR1 PATHWAY; (M68)PID RHOA REG PATHWAY; (M99)PID TXA2PATHWAY		0.0	0.0	0.0	0.0	0.0	0.0	0.0	0.0	0.0	0.0	0.0	0.0	0.0	0.0	0.0	0.0	0.0	0.0	0.0	0.0
ARHGEF5	7984	symbol	H. sapiens	7984	H. sapiens	ARHGEF5	Rho guanine nucleotide exchange factor 5	GO:0002408 myeloid dendritic cell chemotaxis;GO:0051496 positive regulation of stress fiber assembly;GO:0071803 positive regulation of podosome assembly			Cytosol;Nucleoplasm;Plasma membrane(Approved)		(M68)PID RHOA REG PATHWAY		0.0	0.0	0.0	1.0	1.0	0.0	0.0	0.0	0.0	0.0	0.0	0.0	0.0	0.0	0.0	0.0	0.0	0.0	0.0	0.0
ARID3A	1820	symbol	H. sapiens	1820	H. sapiens	ARID3A	AT-rich interaction domain 3A	GO:0006977 DNA damage response, signal transduction by p53 class mediator resulting in cell cycle arrest;GO:0072431 signal transduction involved in mitotic G1 DNA damage checkpoint;GO:0031571 mitotic G1 DNA damage checkpoint		Transcription factors/Helix-turn-helix domains	Cytosol;Nucleoplasm(Supported)Vesicles(Approved)		(M145)PID P53 DOWNSTREAM PATHWAY		0.0	0.0	0.0	0.0	0.0	0.0	0.0	0.0	0.0	0.0	0.0	0.0	0.0	0.0	0.0	0.0	0.0	0.0	0.0	0.0
ARID5A	10865	symbol	H. sapiens	10865	H. sapiens	ARID5A	AT-rich interaction domain 5A	GO:0071391 cellular response to estrogen stimulus;GO:0043627 response to estrogen;GO:0000122 negative regulation of transcription by RNA polymerase II		Transcription factors/Helix-turn-helix domains	Nucleus(Enhanced)Nucleoli(Supported)				0.0	0.0	0.0	0.0	0.0	0.0	0.0	0.0	0.0	0.0	0.0	0.0	0.0	0.0	0.0	0.0	0.0	0.0	0.0	0.0
ARL11	115761	symbol	H. sapiens	115761	H. sapiens	ARL11	ADP ribosylation factor like GTPase 11	GO:0002244 hematopoietic progenitor cell differentiation;GO:0030097 hemopoiesis;GO:0048534 hematopoietic or lymphoid organ development							0.0	0.0	0.0	0.0	0.0	0.0	0.0	0.0	0.0	0.0	0.0	0.0	0.0	0.0	0.0	0.0	0.0	0.0	0.0	0.0
ARPC1B	10095	symbol	H. sapiens	10095	H. sapiens	ARPC1B	actin related protein 2/3 complex subunit 1B	GO:0034314 Arp2/3 complex-mediated actin nucleation;GO:0038096 Fc-gamma receptor signaling pathway involved in phagocytosis;GO:0045010 actin nucleation			Cytosol;Vesicles(Supported)	N-[2-(2-methyl-1H-indol-3-yl)ethyl]thiophene-2-carboxamide (Structural constituent of cytoskeleton);(2S)-2-(3-bromophenyl)-3-(5-chloro-2-hydroxyphenyl)-1,3-thiazolidin-4-one (Structural constituent of cytoskeleton)	(M278)PID RAC1 PATHWAY; (M81)PID CDC42 PATHWAY; (M164)PID ERBB1 DOWNSTREAM PATHWAY		0.0	0.0	0.0	0.0	0.0	0.0	1.0	0.0	0.0	0.0	0.0	0.0	0.0	0.0	0.0	0.0	0.0	0.0	0.0	0.0
ARR3	407	symbol	H. sapiens	407	H. sapiens	ARR3	arrestin 3	GO:0002031 G protein-coupled receptor internalization;GO:0002029 desensitization of G protein-coupled receptor signaling pathway;GO:0022401 negative adaptation of signaling pathway					(M117)PID CONE PATHWAY; (M99)PID TXA2PATHWAY; (M124)PID CXCR4 PATHWAY		0.0	0.0	0.0	0.0	0.0	0.0	0.0	0.0	0.0	0.0	0.0	0.0	0.0	0.0	0.0	0.0	0.0	0.0	0.0	0.0
ARRB2	409	symbol	H. sapiens	409	H. sapiens	ARRB2	arrestin beta 2	GO:0042699 follicle-stimulating hormone signaling pathway;GO:0034122 negative regulation of toll-like receptor signaling pathway;GO:0002032 desensitization of G protein-coupled receptor signaling pathway by arrestin			Vesicles(Supported)		(M26)PID NFKAPPAB ATYPICAL PATHWAY; (M211)PID HEDGEHOG 2PATHWAY; (M185)PID ALK1 PATHWAY	(M5941)HALLMARK UV RESPONSE UP	0.0	0.0	0.0	1.0	1.0	1.0	1.0	1.0	1.0	0.0	1.0	0.0	0.0	0.0	0.0	0.0	0.0	0.0	0.0	1.0
ARRDC5	645432	symbol	H. sapiens	645432	H. sapiens	ARRDC5	arrestin domain containing 5								0.0	0.0	0.0	0.0	0.0	0.0	0.0	0.0	0.0	0.0	0.0	0.0	0.0	0.0	0.0	0.0	0.0	0.0	0.0	0.0
ARSA	410	symbol	H. sapiens	410	H. sapiens	ARSA	arylsulfatase A	GO:0043312 neutrophil degranulation;GO:0006687 glycosphingolipid metabolic process;GO:0002283 neutrophil activation involved in immune response		Enzymes/ENZYME proteins/Hydrolases	Cytosol;Golgi apparatus(Uncertain)	N,4-Dihydroxy-N-Oxo-3-(Sulfooxy)Benzenaminium (Sulfuric ester hydrolase activity);2-Amino-3-Hydroxy-3-Phosphonooxy-Propionic Acid (Sulfuric ester hydrolase activity)			1.0	0.0	0.0	0.0	0.0	0.0	0.0	0.0	0.0	0.0	0.0	0.0	0.0	0.0	0.0	0.0	0.0	0.0	0.0	0.0
ARSJ	79642	symbol	H. sapiens	79642	H. sapiens	ARSJ	arylsulfatase family member J				Actin filaments(Supported)Nucleoli(Approved)				0.0	0.0	0.0	0.0	0.0	0.0	0.0	0.0	0.0	0.0	0.0	0.0	0.0	0.0	0.0	0.0	0.0	0.0	0.0	0.0
ASCL2	430	symbol	H. sapiens	430	H. sapiens	ASCL2	achaete-scute family bHLH transcription factor 2	GO:0010626 negative regulation of Schwann cell proliferation;GO:0060708 spongiotrophoblast differentiation;GO:0010624 regulation of Schwann cell proliferation		Transcription factors/Basic domains					0.0	0.0	0.0	0.0	0.0	0.0	0.0	0.0	0.0	0.0	1.0	0.0	0.0	0.0	0.0	0.0	0.0	0.0	1.0	0.0
ASGR2	433	symbol	H. sapiens	433	H. sapiens	ASGR2	asialoglycoprotein receptor 2	GO:0018279 protein N-linked glycosylation via asparagine;GO:0018196 peptidyl-asparagine modification;GO:0006487 protein N-linked glycosylation			Plasma membrane(Supported)Endoplasmic reticulum(Approved)	Antihemophilic Factor (Recombinant) (Carbohydrate binding)			0.0	0.0	0.0	0.0	0.0	0.0	0.0	0.0	0.0	0.0	0.0	0.0	0.0	0.0	0.0	0.0	0.0	0.0	0.0	0.0
ATG16L2	89849	symbol	H. sapiens	89849	H. sapiens	ATG16L2	autophagy related 16 like 2	GO:0039689 negative stranded viral RNA replication;GO:0039694 viral RNA genome replication;GO:0019079 viral genome replication			Nucleoplasm(Enhanced)				0.0	0.0	0.0	0.0	0.0	0.0	0.0	0.0	0.0	0.0	0.0	0.0	0.0	0.0	0.0	0.0	0.0	0.0	0.0	0.0
ATHL1	80162	gene_synonym	H. sapiens	80162	H. sapiens	PGGHG	protein-glucosylgalactosylhydroxylysine glucosidase	GO:0005975 carbohydrate metabolic process;GO:0044238 primary metabolic process;GO:0071704 organic substance metabolic process		Enzymes/ENZYME proteins/Hydrolases	Cytosol(Enhanced)				0.0	0.0	0.0	0.0	0.0	0.0	0.0	0.0	0.0	0.0	0.0	0.0	0.0	0.0	0.0	0.0	0.0	0.0	0.0	0.0
ATP13A3	79572	symbol	H. sapiens	79572	H. sapiens	ATP13A3	ATPase 13A3	GO:0006874 cellular calcium ion homeostasis;GO:0055074 calcium ion homeostasis;GO:0072503 cellular divalent inorganic cation homeostasis			Cytosol;Nucleoli;Plasma membrane(Approved)				0.0	0.0	0.0	0.0	0.0	0.0	0.0	0.0	0.0	0.0	0.0	0.0	0.0	0.0	0.0	0.0	0.0	0.0	0.0	0.0
ATP2A3	489	symbol	H. sapiens	489	H. sapiens	ATP2A3	ATPase sarcoplasmic/endoplasmic reticulum Ca2+ transporting 3	GO:1903515 calcium ion transport from cytosol to endoplasmic reticulum;GO:0006919 activation of cysteine-type endopeptidase activity involved in apoptotic process;GO:1903779 regulation of cardiac conduction		Enzymes/ENZYME proteins/Hydrolases					0.0	0.0	0.0	0.0	0.0	0.0	0.0	0.0	0.0	0.0	0.0	0.0	0.0	0.0	0.0	0.0	0.0	0.0	0.0	1.0
ATP8B1	5205	symbol	H. sapiens	5205	H. sapiens	ATP8B1	ATPase phospholipid transporting 8B1	GO:0021650 vestibulocochlear nerve formation;GO:0021648 vestibulocochlear nerve morphogenesis;GO:0032534 regulation of microvillus assembly		Enzymes/ENZYME proteins/Hydrolases;Transporters/Primary Active Transporters				(M5916)HALLMARK APICAL SURFACE	0.0	0.0	0.0	0.0	0.0	0.0	0.0	0.0	0.0	0.0	0.0	0.0	0.0	0.0	0.0	0.0	0.0	0.0	0.0	0.0
ATP8B3	148229	symbol	H. sapiens	148229	H. sapiens	ATP8B3	ATPase phospholipid transporting 8B3	GO:0007339 binding of sperm to zona pellucida;GO:0035036 sperm-egg recognition;GO:0045332 phospholipid translocation		Enzymes/ENZYME proteins/Hydrolases					0.0	0.0	0.0	0.0	0.0	0.0	0.0	0.0	0.0	0.0	0.0	0.0	0.0	0.0	0.0	0.0	0.0	0.0	0.0	0.0
ATP8B4	79895	symbol	H. sapiens	79895	H. sapiens	ATP8B4	ATPase phospholipid transporting 8B4 (putative)	GO:0045332 phospholipid translocation;GO:0043312 neutrophil degranulation;GO:0002283 neutrophil activation involved in immune response		Enzymes/ENZYME proteins/Hydrolases	Nucleoplasm;Vesicles(Approved)				1.0	0.0	0.0	0.0	0.0	0.0	0.0	0.0	0.0	0.0	0.0	0.0	0.0	0.0	0.0	0.0	0.0	0.0	0.0	0.0
B4GALT1	2683	symbol	H. sapiens	2683	H. sapiens	B4GALT1	beta-1,4-galactosyltransferase 1	GO:0005989 lactose biosynthetic process;GO:0005988 lactose metabolic process;GO:0018146 keratan sulfate biosynthetic process		Enzymes/ENZYME proteins/Transferases	Golgi apparatus(Enhanced)	N-Acetyl-D-glucosamine (Udp-galactosyltransferase activity);6-Aminohexyl-Uridine-C1,5'-Diphosphate (Udp-galactosyltransferase activity);Di(N-Acetyl-D-Glucosamine) (Udp-galactosyltransferase activity);Galactose-uridine-5'-diphosphate (Udp-galactosyltransferase activity);Uridine-5'-Monophosphate (Udp-galactosyltransferase activity);2-(N-Morpholino)-Ethanesulfonic Acid (Udp-galactosyltransferase act…		(M5916)HALLMARK APICAL SURFACE; (M5908)HALLMARK ANDROGEN RESPONSE; (M5915)HALLMARK APICAL JUNCTION	1.0	0.0	0.0	0.0	1.0	0.0	0.0	0.0	0.0	0.0	1.0	1.0	0.0	0.0	0.0	0.0	0.0	0.0	0.0	1.0
BACE2	25825	symbol	H. sapiens	25825	H. sapiens	BACE2	beta-secretase 2	GO:0042985 negative regulation of amyloid precursor protein biosynthetic process;GO:0048143 astrocyte activation;GO:0010561 negative regulation of glycoprotein biosynthetic process		Enzymes/{ENZYME proteins/Hydrolases,Peptidases/Aspartic-type peptidases}					0.0	0.0	0.0	0.0	0.0	0.0	0.0	0.0	0.0	0.0	0.0	0.0	0.0	0.0	0.0	0.0	0.0	0.0	0.0	0.0
BACH1	571	symbol	H. sapiens	571	H. sapiens	BACH1	BTB domain and CNC homolog 1	GO:0000117 regulation of transcription involved in G2/M transition of mitotic cell cycle;GO:0061418 regulation of transcription from RNA polymerase II promoter in response to hypoxia;GO:0000083 regulation of transcription involved in G1/S transition of mitotic cell cycle		Transcription factors/Basic domains	Cytosol;Nucleus(Approved)			(M5945)HALLMARK HEME METABOLISM	0.0	0.0	0.0	0.0	0.0	0.0	0.0	0.0	0.0	0.0	0.0	0.0	0.0	0.0	0.0	0.0	0.0	0.0	0.0	0.0
BAIAP2L1	55971	symbol	H. sapiens	55971	H. sapiens	BAIAP2L1	BAR/IMD domain containing adaptor protein 2 like 1	GO:0046626 regulation of insulin receptor signaling pathway;GO:2000251 positive regulation of actin cytoskeleton reorganization;GO:0051764 actin crosslink formation			Cytosol;Plasma membrane(Enhanced)				0.0	0.0	0.0	0.0	0.0	0.0	0.0	1.0	0.0	0.0	0.0	0.0	0.0	0.0	0.0	0.0	0.0	0.0	0.0	0.0
BATF	10538	symbol	H. sapiens	10538	H. sapiens	BATF	basic leucine zipper ATF-like transcription factor	GO:0072540 T-helper 17 cell lineage commitment;GO:0002295 T-helper cell lineage commitment;GO:0045064 T-helper 2 cell differentiation		Transcription factors/Basic domains	Nucleoplasm(Enhanced)			(M5947)HALLMARK IL2 STAT5 SIGNALING; (M5907)HALLMARK ESTROGEN RESPONSE LATE	1.0	1.0	1.0	0.0	0.0	1.0	0.0	0.0	0.0	1.0	0.0	0.0	0.0	0.0	0.0	0.0	0.0	0.0	1.0	0.0
BCL2A1	597	symbol	H. sapiens	597	H. sapiens	BCL2A1	BCL2 related protein A1	GO:0021987 cerebral cortex development;GO:0097192 extrinsic apoptotic signaling pathway in absence of ligand;GO:0021543 pallium development					(M10)PID BCR 5PATHWAY; (M145)PID P53 DOWNSTREAM PATHWAY	(M5890)HALLMARK TNFA SIGNALING VIA NFKB	0.0	0.0	0.0	0.0	0.0	0.0	0.0	0.0	0.0	0.0	0.0	0.0	0.0	0.0	0.0	0.0	0.0	0.0	0.0	0.0
BCL3	602	symbol	H. sapiens	602	H. sapiens	BCL3	BCL3 transcription coactivator	GO:0045064 T-helper 2 cell differentiation;GO:0002315 marginal zone B cell differentiation;GO:0045082 positive regulation of interleukin-10 biosynthetic process		Transcription factors/Immunoglobulin fold	Nucleoplasm(Supported)Midbody;Vesicles(Approved)		(M26)PID NFKAPPAB ATYPICAL PATHWAY	(M5950)HALLMARK ALLOGRAFT REJECTION; (M5890)HALLMARK TNFA SIGNALING VIA NFKB; (M5901)HALLMARK G2M CHECKPOINT	1.0	0.0	1.0	1.0	0.0	1.0	0.0	1.0	0.0	1.0	0.0	1.0	0.0	0.0	0.0	0.0	0.0	1.0	0.0	0.0
BDKRB1	623	symbol	H. sapiens	623	H. sapiens	BDKRB1	bradykinin receptor B1	GO:0051281 positive regulation of release of sequestered calcium ion into cytosol;GO:0051279 regulation of release of sequestered calcium ion into cytosol;GO:0010524 positive regulation of calcium ion transport into cytosol		G-protein coupled receptors/GPCRs excl olfactory receptors				(M5932)HALLMARK INFLAMMATORY RESPONSE	0.0	0.0	0.0	0.0	1.0	0.0	0.0	1.0	0.0	0.0	0.0	0.0	0.0	0.0	0.0	0.0	0.0	0.0	0.0	0.0
BDKRB2	624	symbol	H. sapiens	624	H. sapiens	BDKRB2	bradykinin receptor B2	GO:1902239 negative regulation of intrinsic apoptotic signaling pathway in response to osmotic stress by p53 class mediator;GO:1902238 regulation of intrinsic apoptotic signaling pathway in response to osmotic stress by p53 class mediator;GO:1990127 intrinsic apoptotic signaling pathway in response to osmotic stress by p53 class mediator		G-protein coupled receptors/GPCRs excl olfactory receptors		Anatibant (Type 1 angiotensin receptor binding);Icatibant (Type 1 angiotensin receptor binding)	(M236)PID DELTA NP63 PATHWAY; (M145)PID P53 DOWNSTREAM PATHWAY	(M5909)HALLMARK MYOGENESIS	0.0	0.0	0.0	0.0	0.0	0.0	0.0	0.0	0.0	0.0	0.0	0.0	0.0	0.0	0.0	0.0	0.0	0.0	0.0	0.0
BHLHE40	8553	symbol	H. sapiens	8553	H. sapiens	BHLHE40	basic helix-loop-helix family member e40	GO:0043153 entrainment of circadian clock by photoperiod;GO:0009649 entrainment of circadian clock;GO:0009648 photoperiodism		Transcription factors/Basic domains	Nuclear bodies(Supported)		(M95)PID CIRCADIAN PATHWAY; (M44)PID HIF2PATHWAY; (M255)PID HIF1 TFPATHWAY	(M5942)HALLMARK UV RESPONSE DN; (M5947)HALLMARK IL2 STAT5 SIGNALING; (M5891)HALLMARK HYPOXIA	0.0	0.0	0.0	0.0	0.0	0.0	0.0	0.0	0.0	0.0	0.0	0.0	0.0	0.0	0.0	0.0	0.0	0.0	0.0	0.0
BICC1	80114	symbol	H. sapiens	80114	H. sapiens	BICC1	BicC family RNA binding protein 1	GO:0090090 negative regulation of canonical Wnt signaling pathway;GO:0030178 negative regulation of Wnt signaling pathway;GO:0007368 determination of left/right symmetry			Nucleoplasm(Approved)				0.0	0.0	0.0	0.0	0.0	0.0	0.0	0.0	0.0	0.0	0.0	0.0	0.0	0.0	0.0	0.0	0.0	0.0	0.0	0.0
BIN2	51411	symbol	H. sapiens	51411	H. sapiens	BIN2	bridging integrator 2	GO:0097320 plasma membrane tubulation;GO:0043312 neutrophil degranulation;GO:0071800 podosome assembly							1.0	0.0	0.0	0.0	1.0	0.0	0.0	0.0	0.0	0.0	0.0	0.0	0.0	0.0	0.0	0.0	0.0	0.0	0.0	0.0
BIRC3	330	symbol	H. sapiens	330	H. sapiens	BIRC3	baculoviral IAP repeat containing 3	GO:0039535 regulation of RIG-I signaling pathway;GO:0070424 regulation of nucleotide-binding oligomerization domain containing signaling pathway;GO:0035666 TRIF-dependent toll-like receptor signaling pathway		Enzymes/ENZYME proteins/Transferases	Cytosol;Nucleoplasm(Supported)		(M7997)SA CASPASE CASCADE; (M18030)ST TUMOR NECROSIS FACTOR PATHWAY; (M45)PID CD40 PATHWAY	(M5902)HALLMARK APOPTOSIS; (M5953)HALLMARK KRAS SIGNALING UP; (M5890)HALLMARK TNFA SIGNALING VIA NFKB	0.0	1.0	0.0	1.0	0.0	1.0	1.0	0.0	1.0	0.0	0.0	0.0	1.0	1.0	0.0	0.0	0.0	1.0	0.0	0.0
BLVRB	645	symbol	H. sapiens	645	H. sapiens	BLVRB	biliverdin reductase B	GO:0042167 heme catabolic process;GO:0006787 porphyrin-containing compound catabolic process;GO:0046149 pigment catabolic process		Enzymes/ENZYME proteins/Oxidoreductases	Cytosol(Supported)Nucleoplasm;Plasma membrane(Approved)	Riboflavin (Riboflavin reductase (nadph) activity);NADH (Riboflavin reductase (nadph) activity);Biliverdine Ix Alpha (Riboflavin reductase (nadph) activity);Riboflavin Monophosphate (Riboflavin reductase (nadph) activity);2'-Monophosphoadenosine 5'-Diphosphoribose (Riboflavin reductase (nadph) activity);7,8-dimethylalloxazine (Riboflavin reductase (nadph) activity);Mesobiliverdin Iv Alpha (Ribofl…		(M5906)HALLMARK ESTROGEN RESPONSE EARLY; (M5945)HALLMARK HEME METABOLISM; (M5907)HALLMARK ESTROGEN RESPONSE LATE	0.0	0.0	0.0	0.0	0.0	0.0	0.0	0.0	0.0	0.0	0.0	0.0	0.0	0.0	0.0	0.0	0.0	0.0	0.0	0.0
BMP1	649	symbol	H. sapiens	649	H. sapiens	BMP1	bone morphogenetic protein 1	GO:0034380 high-density lipoprotein particle assembly;GO:0034377 plasma lipoprotein particle assembly;GO:0061036 positive regulation of cartilage development		Enzymes/{ENZYME proteins/Hydrolases,Peptidases/Metallopeptidases}			(M3468)NABA ECM REGULATORS; (M5885)NABA MATRISOME ASSOCIATED; (M5889)NABA MATRISOME	(M5946)HALLMARK COAGULATION; (M5915)HALLMARK APICAL JUNCTION; (M5930)HALLMARK EPITHELIAL MESENCHYMAL TRANSITION	0.0	0.0	0.0	0.0	0.0	0.0	0.0	0.0	0.0	0.0	0.0	1.0	0.0	0.0	0.0	1.0	0.0	0.0	0.0	0.0
BMP2K	55589	symbol	H. sapiens	55589	H. sapiens	BMP2K	BMP2 inducible kinase	GO:2000369 regulation of clathrin-dependent endocytosis;GO:0045747 positive regulation of Notch signaling pathway;GO:0030500 regulation of bone mineralization	Other	Enzymes/{ENZYME proteins/Transferases,Kinases}	Nuclear speckles(Supported)			(M5945)HALLMARK HEME METABOLISM	0.0	0.0	0.0	0.0	0.0	0.0	0.0	0.0	0.0	0.0	0.0	0.0	0.0	0.0	0.0	0.0	0.0	0.0	0.0	0.0
BMP8A	353500	symbol	H. sapiens	353500	H. sapiens	BMP8A	bone morphogenetic protein 8a	GO:0046676 negative regulation of insulin secretion;GO:0002024 diet induced thermogenesis;GO:0090278 negative regulation of peptide hormone secretion					(M5883)NABA SECRETED FACTORS; (M5885)NABA MATRISOME ASSOCIATED; (M5889)NABA MATRISOME		0.0	0.0	0.0	1.0	0.0	0.0	0.0	0.0	0.0	0.0	0.0	0.0	0.0	0.0	0.0	1.0	0.0	0.0	0.0	0.0
BNC2	54796	symbol	H. sapiens	54796	H. sapiens	BNC2	basonuclin 2	GO:0003416 endochondral bone growth;GO:0043586 tongue development;GO:0098868 bone growth		Transcription factors/Zinc-coordinating DNA-binding domains	Nucleoplasm(Supported)				0.0	0.0	0.0	0.0	0.0	0.0	0.0	0.0	0.0	0.0	0.0	0.0	0.0	0.0	0.0	0.0	0.0	0.0	0.0	0.0
BSND	7809	symbol	H. sapiens	7809	H. sapiens	BSND	barttin CLCNK type accessory subunit beta	GO:1902476 chloride transmembrane transport;GO:0006821 chloride transport;GO:0098661 inorganic anion transmembrane transport		Transporters/Accessory Factors Involved in Transport					0.0	0.0	0.0	0.0	0.0	0.0	0.0	0.0	0.0	0.0	0.0	0.0	0.0	0.0	0.0	0.0	0.0	0.0	0.0	0.0
BTBD11	121551	symbol	H. sapiens	121551	H. sapiens	BTBD11	BTB domain containing 11	GO:0060395 SMAD protein signal transduction;GO:0007178 transmembrane receptor protein serine/threonine kinase signaling pathway;GO:0007167 enzyme linked receptor protein signaling pathway			Nucleoplasm(Approved)				0.0	0.0	0.0	0.0	0.0	0.0	0.0	0.0	0.0	0.0	0.0	0.0	0.0	0.0	0.0	0.0	0.0	0.0	0.0	0.0
BTBD19	149478	symbol	H. sapiens	149478	H. sapiens	BTBD19	BTB domain containing 19								0.0	0.0	0.0	0.0	0.0	0.0	0.0	0.0	0.0	0.0	0.0	0.0	0.0	0.0	0.0	0.0	0.0	0.0	0.0	0.0
C10orf55	414236	symbol	H. sapiens	414236	H. sapiens	C10orf55	chromosome 10 open reading frame 55 (putative)				Nucleus(Approved)				0.0	0.0	0.0	0.0	0.0	0.0	0.0	0.0	0.0	0.0	0.0	0.0	0.0	0.0	0.0	0.0	0.0	0.0	0.0	0.0
C11orf45	219833	symbol	H. sapiens	219833	H. sapiens	C11orf45	chromosome 11 open reading frame 45				Cytosol(Approved)				0.0	0.0	0.0	0.0	0.0	0.0	0.0	0.0	0.0	0.0	0.0	0.0	0.0	0.0	0.0	0.0	0.0	0.0	0.0	0.0
C11orf88	399949	symbol	H. sapiens	399949	H. sapiens	C11orf88	chromosome 11 open reading frame 88								0.0	0.0	0.0	0.0	0.0	0.0	0.0	0.0	0.0	0.0	0.0	0.0	0.0	0.0	0.0	0.0	0.0	0.0	0.0	0.0
C15orf48	84419	symbol	H. sapiens	84419	H. sapiens	C15orf48	chromosome 15 open reading frame 48	GO:1902600 proton transmembrane transport;GO:0022900 electron transport chain;GO:0015672 monovalent inorganic cation transport							0.0	0.0	0.0	0.0	0.0	0.0	0.0	1.0	0.0	0.0	0.0	0.0	0.0	0.0	0.0	0.0	0.0	0.0	0.0	0.0
C15orf52	388115	gene_synonym	H. sapiens	388115	H. sapiens	CCDC9B	coiled-coil domain containing 9B				Cytosol;Nucleoplasm(Approved)				0.0	0.0	0.0	0.0	0.0	0.0	0.0	0.0	0.0	0.0	0.0	0.0	0.0	0.0	0.0	0.0	0.0	0.0	0.0	0.0
C15orf62	643338	symbol	H. sapiens	643338	H. sapiens	C15orf62	chromosome 15 open reading frame 62	GO:0031274 positive regulation of pseudopodium assembly;GO:0031272 regulation of pseudopodium assembly;GO:0031269 pseudopodium assembly							0.0	0.0	0.0	0.0	0.0	0.0	0.0	0.0	0.0	0.0	0.0	0.0	0.0	0.0	0.0	0.0	0.0	0.0	0.0	0.0
C16orf54	283897	symbol	H. sapiens	283897	H. sapiens	C16orf54	chromosome 16 open reading frame 54								0.0	0.0	0.0	0.0	0.0	0.0	0.0	0.0	0.0	0.0	0.0	0.0	0.0	0.0	0.0	0.0	0.0	0.0	0.0	0.0
C19orf35	374872	gene_synonym	H. sapiens	374872	H. sapiens	PEAK3	PEAK family member 3	GO:0008360 regulation of cell shape;GO:0032956 regulation of actin cytoskeleton organization;GO:0022604 regulation of cell morphogenesis	Other						0.0	0.0	0.0	0.0	0.0	0.0	0.0	0.0	0.0	0.0	0.0	0.0	0.0	0.0	0.0	0.0	0.0	0.0	0.0	0.0
C1orf127	148345	symbol	H. sapiens	148345	H. sapiens	C1orf127	chromosome 1 open reading frame 127	GO:0007507 heart development;GO:0072359 circulatory system development;GO:0048513 animal organ development							0.0	0.0	0.0	0.0	0.0	0.0	0.0	0.0	0.0	0.0	0.0	0.0	0.0	0.0	0.0	0.0	0.0	0.0	0.0	0.0
C1orf162	128346	symbol	H. sapiens	128346	H. sapiens	C1orf162	chromosome 1 open reading frame 162								0.0	0.0	0.0	0.0	0.0	0.0	0.0	0.0	0.0	0.0	0.0	0.0	0.0	0.0	0.0	0.0	0.0	0.0	0.0	0.0
C1orf228	339541	gene_synonym	H. sapiens	339541	H. sapiens	ARMH1	armadillo like helical domain containing 1				Cytosol(Uncertain)				0.0	0.0	0.0	0.0	0.0	0.0	0.0	0.0	0.0	0.0	0.0	0.0	0.0	0.0	0.0	0.0	0.0	0.0	0.0	0.0
C1QA	712	symbol	H. sapiens	712	H. sapiens	C1QA	complement C1q A chain	GO:0048143 astrocyte activation;GO:0150064 vertebrate eye-specific patterning;GO:0150062 complement-mediated synapse pruning			Cytosol;Golgi apparatus(Uncertain)	Cetuximab;Etanercept;Adalimumab;Abciximab;Gemtuzumab ozogamicin;Trastuzumab;Rituximab;Basiliximab;Muromonab;Ibritumomab tiuxetan;Tositumomab;Alemtuzumab;Alefacept;Efalizumab;Natalizumab;Palivizumab;Daclizumab;Bevacizumab	(M5880)NABA ECM AFFILIATED; (M5885)NABA MATRISOME ASSOCIATED; (M5889)NABA MATRISOME	(M5946)HALLMARK COAGULATION; (M5921)HALLMARK COMPLEMENT	1.0	0.0	0.0	0.0	0.0	1.0	1.0	0.0	0.0	0.0	0.0	0.0	1.0	1.0	0.0	1.0	0.0	0.0	0.0	0.0
C1QB	713	symbol	H. sapiens	713	H. sapiens	C1QB	complement C1q B chain	GO:0006958 complement activation, classical pathway;GO:0030449 regulation of complement activation;GO:0098883 synapse pruning				Cetuximab;Etanercept;Adalimumab;Abciximab;Gemtuzumab ozogamicin;Trastuzumab;Rituximab;Basiliximab;Muromonab;Ibritumomab tiuxetan;Tositumomab;Alemtuzumab;Alefacept;Efalizumab;Natalizumab;Palivizumab;Daclizumab;Bevacizumab	(M5880)NABA ECM AFFILIATED; (M5885)NABA MATRISOME ASSOCIATED; (M5889)NABA MATRISOME		0.0	0.0	0.0	0.0	0.0	1.0	1.0	0.0	0.0	0.0	0.0	0.0	1.0	1.0	0.0	1.0	0.0	0.0	0.0	0.0
C1QC	714	symbol	H. sapiens	714	H. sapiens	C1QC	complement C1q C chain	GO:0045650 negative regulation of macrophage differentiation;GO:0030853 negative regulation of granulocyte differentiation;GO:0030852 regulation of granulocyte differentiation			Vesicles(Uncertain)	Cetuximab;Etanercept;Adalimumab;Abciximab;Gemtuzumab ozogamicin;Trastuzumab;Rituximab;Basiliximab;Muromonab;Ibritumomab tiuxetan;Tositumomab;Alemtuzumab;Alefacept;Efalizumab;Natalizumab;Palivizumab;Daclizumab;Bevacizumab	(M5880)NABA ECM AFFILIATED; (M5885)NABA MATRISOME ASSOCIATED; (M5889)NABA MATRISOME	(M5921)HALLMARK COMPLEMENT	0.0	0.0	1.0	0.0	0.0	1.0	1.0	0.0	0.0	0.0	1.0	0.0	1.0	1.0	0.0	1.0	0.0	0.0	1.0	0.0
C1R	715	symbol	H. sapiens	715	H. sapiens	C1R	complement C1r	GO:0006958 complement activation, classical pathway;GO:0030449 regulation of complement activation;GO:0002455 humoral immune response mediated by circulating immunoglobulin		Enzymes/{ENZYME proteins/Hydrolases,Peptidases/Serine-type peptidases}	Cytosol;Nucleoplasm(Uncertain)	Cetuximab (Serine-type peptidase activity);Etanercept (Serine-type peptidase activity);Adalimumab (Serine-type peptidase activity);Abciximab (Serine-type peptidase activity);Gemtuzumab ozogamicin (Serine-type peptidase activity);Trastuzumab (Serine-type peptidase activity);Rituximab (Serine-type peptidase activity);Basiliximab (Serine-type peptidase activity);Muromonab (Serine-type peptidase acti…		(M5946)HALLMARK COAGULATION; (M5921)HALLMARK COMPLEMENT; (M5913)HALLMARK INTERFERON GAMMA RESPONSE	0.0	0.0	0.0	0.0	0.0	1.0	1.0	0.0	0.0	0.0	0.0	0.0	1.0	1.0	0.0	0.0	0.0	0.0	0.0	0.0
C1RL	51279	symbol	H. sapiens	51279	H. sapiens	C1RL	complement C1r subcomponent like	GO:0006958 complement activation, classical pathway;GO:0002455 humoral immune response mediated by circulating immunoglobulin;GO:0031638 zymogen activation		Enzymes/Peptidases/Serine-type peptidases	Cytosol;Microtubules(Approved)				0.0	0.0	0.0	0.0	0.0	1.0	1.0	0.0	0.0	0.0	0.0	0.0	0.0	0.0	0.0	0.0	0.0	0.0	0.0	0.0
C1S	716	symbol	H. sapiens	716	H. sapiens	C1S	complement C1s	GO:0006958 complement activation, classical pathway;GO:0030449 regulation of complement activation;GO:0002455 humoral immune response mediated by circulating immunoglobulin		Enzymes/{ENZYME proteins/Hydrolases,Peptidases/Serine-type peptidases}	Cytosol;Nucleus(Approved)	Cetuximab (Serine-type endopeptidase activity);Etanercept (Serine-type endopeptidase activity);Adalimumab (Serine-type endopeptidase activity);Abciximab (Serine-type endopeptidase activity);Gemtuzumab ozogamicin (Serine-type endopeptidase activity);Trastuzumab (Serine-type endopeptidase activity);Rituximab (Serine-type endopeptidase activity);Basiliximab (Serine-type endopeptidase activity);Murom…		(M5911)HALLMARK INTERFERON ALPHA RESPONSE; (M5946)HALLMARK COAGULATION; (M5921)HALLMARK COMPLEMENT	0.0	0.0	0.0	0.0	0.0	1.0	1.0	0.0	0.0	0.0	0.0	0.0	1.0	1.0	0.0	0.0	0.0	0.0	0.0	0.0
C2	717	symbol	H. sapiens	717	H. sapiens	C2	complement C2	GO:2000427 positive regulation of apoptotic cell clearance;GO:2000425 regulation of apoptotic cell clearance;GO:0006958 complement activation, classical pathway		Enzymes/{ENZYME proteins/Hydrolases,Peptidases/Serine-type peptidases}				(M5946)HALLMARK COAGULATION; (M5921)HALLMARK COMPLEMENT; (M5950)HALLMARK ALLOGRAFT REJECTION	0.0	0.0	0.0	0.0	0.0	1.0	1.0	0.0	0.0	0.0	0.0	0.0	1.0	1.0	0.0	0.0	0.0	0.0	0.0	0.0
C20orf141	128653	symbol	H. sapiens	128653	H. sapiens	C20orf141	chromosome 20 open reading frame 141								0.0	0.0	0.0	0.0	0.0	0.0	0.0	0.0	0.0	0.0	0.0	0.0	0.0	0.0	0.0	0.0	0.0	0.0	0.0	0.0
C22orf15	150248	symbol	H. sapiens	150248	H. sapiens	C22orf15	chromosome 22 open reading frame 15								0.0	0.0	0.0	0.0	0.0	0.0	0.0	0.0	0.0	0.0	0.0	0.0	0.0	0.0	0.0	0.0	0.0	0.0	0.0	0.0
C2CD2	25966	symbol	H. sapiens	25966	H. sapiens	C2CD2	C2 calcium dependent domain containing 2				Nucleoplasm(Approved)				0.0	0.0	0.0	0.0	0.0	0.0	0.0	0.0	0.0	0.0	0.0	0.0	0.0	0.0	0.0	0.0	0.0	0.0	0.0	0.0
C2orf66	401027	symbol	H. sapiens	401027	H. sapiens	C2orf66	chromosome 2 open reading frame 66								0.0	0.0	0.0	0.0	0.0	0.0	0.0	0.0	0.0	0.0	0.0	0.0	0.0	0.0	0.0	0.0	0.0	0.0	0.0	0.0
C3	718	symbol	H. sapiens	718	H. sapiens	C3	complement C3	GO:0001798 positive regulation of type IIa hypersensitivity;GO:0001970 positive regulation of activation of membrane attack complex;GO:0002894 positive regulation of type II hypersensitivity				Immune Globulin Human (Receptor binding);S-Hydroxycysteine (Receptor binding)	(M119)PID ERB GENOMIC PATHWAY; (M169)PID INTEGRIN2 PATHWAY; (M200)PID ERA GENOMIC PATHWAY	(M5946)HALLMARK COAGULATION; (M5905)HALLMARK ADIPOGENESIS; (M5921)HALLMARK COMPLEMENT	1.0	0.0	0.0	1.0	0.0	1.0	1.0	1.0	1.0	0.0	0.0	0.0	1.0	1.0	1.0	0.0	0.0	0.0	0.0	0.0
C3AR1	719	symbol	H. sapiens	719	H. sapiens	C3AR1	complement C3a receptor 1	GO:0090023 positive regulation of neutrophil chemotaxis;GO:0010759 positive regulation of macrophage chemotaxis;GO:0071624 positive regulation of granulocyte chemotaxis		G-protein coupled receptors/{Chemokines and chemotactic factors receptors,GPCRs excl olfactory receptors}				(M5932)HALLMARK INFLAMMATORY RESPONSE; (M5953)HALLMARK KRAS SIGNALING UP	1.0	0.0	0.0	1.0	1.0	1.0	1.0	0.0	0.0	0.0	0.0	0.0	1.0	1.0	0.0	0.0	0.0	0.0	0.0	0.0
C3orf52	79669	symbol	H. sapiens	79669	H. sapiens	C3orf52	chromosome 3 open reading frame 52								0.0	0.0	0.0	0.0	0.0	0.0	0.0	0.0	0.0	0.0	0.0	0.0	0.0	0.0	0.0	0.0	0.0	0.0	0.0	0.0
C3orf58	205428	gene_synonym	H. sapiens	205428	H. sapiens	DIPK2A	divergent protein kinase domain 2A	GO:0034392 negative regulation of smooth muscle cell apoptotic process;GO:0034391 regulation of smooth muscle cell apoptotic process;GO:0060038 cardiac muscle cell proliferation							0.0	0.0	0.0	0.0	0.0	0.0	0.0	0.0	0.0	0.0	0.0	0.0	0.0	0.0	0.0	0.0	0.0	0.0	0.0	0.0
C4BPB	725	symbol	H. sapiens	725	H. sapiens	C4BPB	complement component 4 binding protein beta	GO:0045959 negative regulation of complement activation, classical pathway;GO:0030450 regulation of complement activation, classical pathway;GO:0002924 negative regulation of humoral immune response mediated by circulating immunoglobulin					(M285)PID HNF3A PATHWAY	(M5941)HALLMARK UV RESPONSE UP; (M5921)HALLMARK COMPLEMENT	0.0	0.0	0.0	0.0	0.0	1.0	1.0	1.0	0.0	0.0	1.0	0.0	0.0	1.0	0.0	0.0	0.0	0.0	0.0	1.0
C5AR1	728	symbol	H. sapiens	728	H. sapiens	C5AR1	complement C5a receptor 1	GO:0038178 complement component C5a signaling pathway;GO:0090023 positive regulation of neutrophil chemotaxis;GO:0010759 positive regulation of macrophage chemotaxis		CD markers;G-protein coupled receptors/{Chemokines and chemotactic factors receptors,GPCRs excl olfactory receptors}				(M5932)HALLMARK INFLAMMATORY RESPONSE	1.0	0.0	0.0	1.0	1.0	1.0	1.0	1.0	0.0	0.0	0.0	0.0	1.0	1.0	0.0	0.0	0.0	0.0	0.0	0.0
C5AR2	27202	symbol	H. sapiens	27202	H. sapiens	C5AR2	complement component 5a receptor 2	GO:0090024 negative regulation of neutrophil chemotaxis;GO:0038178 complement component C5a signaling pathway;GO:0071623 negative regulation of granulocyte chemotaxis		G-protein coupled receptors/{Chemokines and chemotactic factors receptors,GPCRs excl olfactory receptors}					0.0	0.0	0.0	1.0	1.0	1.0	1.0	0.0	0.0	0.0	1.0	0.0	0.0	1.0	0.0	0.0	0.0	0.0	0.0	0.0
C5orf58	133874	symbol	H. sapiens	133874	H. sapiens	C5orf58	chromosome 5 open reading frame 58								0.0	0.0	0.0	0.0	0.0	0.0	0.0	0.0	0.0	0.0	0.0	0.0	0.0	0.0	0.0	0.0	0.0	0.0	0.0	0.0
C6orf141	135398	symbol	H. sapiens	135398	H. sapiens	C6orf141	chromosome 6 open reading frame 141	GO:0001835 blastocyst hatching;GO:0035188 hatching;GO:0001824 blastocyst development			Nuclear membrane(Approved)				0.0	0.0	0.0	0.0	0.0	0.0	0.0	0.0	0.0	0.0	0.0	0.0	0.0	0.0	0.0	0.0	0.0	0.0	0.0	0.0
C8orf4	56892	gene_synonym	H. sapiens	56892	H. sapiens	TCIM	transcriptional and immune response regulator	GO:1900020 positive regulation of protein kinase C activity;GO:0002264 endothelial cell activation involved in immune response;GO:1900019 regulation of protein kinase C activity			Cytosol;Nucleoplasm;Plasma membrane(Approved)				1.0	0.0	1.0	0.0	0.0	0.0	0.0	0.0	0.0	0.0	0.0	0.0	0.0	0.0	0.0	0.0	0.0	0.0	0.0	0.0
C9orf66	157983	gene_synonym	H. sapiens	157983	H. sapiens	DOCK8-AS1	DOCK8 antisense RNA 1								0.0	0.0	0.0	0.0	0.0	0.0	0.0	0.0	0.0	0.0	0.0	0.0	0.0	0.0	0.0	0.0	0.0	0.0	0.0	0.0
CA12	771	symbol	H. sapiens	771	H. sapiens	CA12	carbonic anhydrase 12	GO:0055064 chloride ion homeostasis;GO:0055083 monovalent inorganic anion homeostasis;GO:0015701 bicarbonate transport		Enzymes/ENZYME proteins/Lyases	Nucleus;Vesicles(Approved)	Benzthiazide (Zinc ion binding);Hydroflumethiazide (Zinc ion binding);Zonisamide (Zinc ion binding);Hydrochlorothiazide (Zinc ion binding);Ellagic Acid (Zinc ion binding)		(M5906)HALLMARK ESTROGEN RESPONSE EARLY; (M5891)HALLMARK HYPOXIA; (M5907)HALLMARK ESTROGEN RESPONSE LATE	0.0	0.0	0.0	0.0	0.0	0.0	0.0	0.0	0.0	0.0	0.0	0.0	0.0	0.0	0.0	0.0	0.0	0.0	0.0	0.0
CABP4	57010	symbol	H. sapiens	57010	H. sapiens	CABP4	calcium binding protein 4	GO:0046549 retinal cone cell development;GO:0060040 retinal bipolar neuron differentiation;GO:0042670 retinal cone cell differentiation							0.0	0.0	0.0	0.0	0.0	0.0	0.0	0.0	0.0	0.0	0.0	0.0	0.0	0.0	0.0	0.0	0.0	0.0	0.0	0.0
CACNA2D4	93589	symbol	H. sapiens	93589	H. sapiens	CACNA2D4	calcium voltage-gated channel auxiliary subunit alpha2delta 4	GO:0050908 detection of light stimulus involved in visual perception;GO:0050962 detection of light stimulus involved in sensory perception;GO:0061337 cardiac conduction							0.0	0.0	0.0	0.0	0.0	0.0	0.0	0.0	0.0	0.0	0.0	0.0	0.0	0.0	0.0	0.0	0.0	0.0	0.0	0.0
CALHM2	51063	symbol	H. sapiens	51063	H. sapiens	CALHM2	calcium homeostasis modulator family member 2	GO:0043065 positive regulation of apoptotic process;GO:0043068 positive regulation of programmed cell death;GO:0010942 positive regulation of cell death		Transporters/Transporter channels and pores	Cytosol;Mitochondria;Nucleoplasm(Approved)				0.0	0.0	0.0	0.0	0.0	0.0	0.0	0.0	0.0	0.0	0.0	0.0	0.0	0.0	0.0	0.0	0.0	0.0	0.0	0.0
CALML4	91860	symbol	H. sapiens	91860	H. sapiens	CALML4	calmodulin like 4	GO:0019722 calcium-mediated signaling;GO:0019932 second-messenger-mediated signaling;GO:0000226 microtubule cytoskeleton organization		RAS pathway related proteins	Cytosol;Golgi apparatus;Nucleoplasm(Approved)				0.0	0.0	0.0	0.0	0.0	0.0	0.0	0.0	0.0	0.0	0.0	0.0	1.0	0.0	0.0	0.0	1.0	0.0	0.0	0.0
CALML6	163688	symbol	H. sapiens	163688	H. sapiens	CALML6	calmodulin like 6	GO:0019722 calcium-mediated signaling;GO:0019932 second-messenger-mediated signaling;GO:0000226 microtubule cytoskeleton organization		RAS pathway related proteins					0.0	0.0	0.0	0.0	0.0	0.0	0.0	0.0	0.0	0.0	0.0	0.0	1.0	0.0	0.0	0.0	1.0	0.0	0.0	0.0
CAMP	820	symbol	H. sapiens	820	H. sapiens	CAMP	cathelicidin antimicrobial peptide	GO:0051873 killing by host of symbiont cells;GO:0051852 disruption by host of symbiont cells;GO:0051883 killing of cells in other organism involved in symbiotic interaction				Selenocysteine	(M599)ST PAC1 RECEPTOR PATHWAY; (M14775)ST G ALPHA S PATHWAY; (M2701)ST MYOCYTE AD PATHWAY		1.0	0.0	0.0	0.0	0.0	0.0	0.0	1.0	0.0	0.0	0.0	0.0	1.0	0.0	0.0	0.0	0.0	0.0	0.0	0.0
CAPN11	11131	symbol	H. sapiens	11131	H. sapiens	CAPN11	calpain 11	GO:0006508 proteolysis;GO:0019538 protein metabolic process;GO:1901564 organonitrogen compound metabolic process		Enzymes/Peptidases/Cysteine-type peptidases					0.0	0.0	0.0	0.0	0.0	0.0	0.0	0.0	0.0	0.0	0.0	1.0	0.0	0.0	0.0	0.0	0.0	0.0	0.0	0.0
CAPN12	147968	symbol	H. sapiens	147968	H. sapiens	CAPN12	calpain 12	GO:0006508 proteolysis;GO:0019538 protein metabolic process;GO:1901564 organonitrogen compound metabolic process		Enzymes/Peptidases/Cysteine-type peptidases	Focal adhesion sites;Nucleoplasm(Approved)				0.0	0.0	0.0	0.0	0.0	0.0	0.0	0.0	0.0	0.0	0.0	1.0	0.0	0.0	0.0	0.0	0.0	0.0	0.0	0.0
CAPN2	824	symbol	H. sapiens	824	H. sapiens	CAPN2	calpain 2	GO:2001247 positive regulation of phosphatidylcholine biosynthetic process;GO:2001245 regulation of phosphatidylcholine biosynthetic process;GO:0010666 positive regulation of cardiac muscle cell apoptotic process		Enzymes/{ENZYME proteins/Hydrolases,Peptidases/Cysteine-type peptidases}	Cytosol(Supported)		(M281)PID FAK PATHWAY; (M164)PID ERBB1 DOWNSTREAM PATHWAY	(M5946)HALLMARK COAGULATION	0.0	0.0	0.0	1.0	0.0	0.0	0.0	1.0	0.0	0.0	0.0	1.0	0.0	0.0	0.0	0.0	0.0	0.0	0.0	0.0
CARD11	84433	symbol	H. sapiens	84433	H. sapiens	CARD11	caspase recruitment domain family member 11	GO:0046710 GDP metabolic process;GO:0045061 thymic T cell selection;GO:0046037 GMP metabolic process					(M88)PID CD8 TCR PATHWAY; (M10)PID BCR 5PATHWAY; (M34)PID TCR PATHWAY		0.0	0.0	1.0	1.0	0.0	1.0	1.0	0.0	1.0	0.0	0.0	0.0	1.0	0.0	1.0	0.0	0.0	0.0	0.0	0.0
CARD16	114769	symbol	H. sapiens	114769	H. sapiens	CARD16	caspase recruitment domain family member 16	GO:0050713 negative regulation of interleukin-1 beta secretion;GO:0031665 negative regulation of lipopolysaccharide-mediated signaling pathway;GO:0050711 negative regulation of interleukin-1 secretion			Mitochondria(Uncertain)				0.0	1.0	0.0	1.0	0.0	0.0	0.0	1.0	0.0	0.0	0.0	0.0	0.0	0.0	0.0	0.0	0.0	0.0	0.0	0.0
CARD6	84674	symbol	H. sapiens	84674	H. sapiens	CARD6	caspase recruitment domain family member 6	GO:0042981 regulation of apoptotic process;GO:0043067 regulation of programmed cell death;GO:0006915 apoptotic process			Cytosol;Focal adhesion sites(Approved)				0.0	0.0	0.0	0.0	0.0	0.0	0.0	0.0	0.0	0.0	0.0	0.0	0.0	0.0	0.0	0.0	0.0	0.0	0.0	0.0
CARD9	64170	symbol	H. sapiens	64170	H. sapiens	CARD9	caspase recruitment domain family member 9	GO:0002223 stimulatory C-type lectin receptor signaling pathway;GO:0002220 innate immune response activating cell surface receptor signaling pathway;GO:0045076 regulation of interleukin-2 biosynthetic process							0.0	0.0	0.0	1.0	0.0	0.0	1.0	1.0	1.0	0.0	0.0	0.0	1.0	0.0	0.0	0.0	0.0	0.0	0.0	0.0
CASP1	834	symbol	H. sapiens	834	H. sapiens	CASP1	caspase 1	GO:0050718 positive regulation of interleukin-1 beta secretion;GO:1903265 positive regulation of tumor necrosis factor-mediated signaling pathway;GO:0050716 positive regulation of interleukin-1 secretion		Enzymes/{ENZYME proteins/Hydrolases,Peptidases/Cysteine-type peptidases}	Cytosol(Supported)Nucleoplasm(Approved)	Minocycline (Endopeptidase activity);Pralnacasan (Endopeptidase activity);LAX-101 (Endopeptidase activity);IDN-6556 (Endopeptidase activity);VX-765 (Endopeptidase activity);1-METHYL-3-TRIFLUOROMETHYL-1H-THIENO[2,3-C]PYRAZOLE-5-CARBOXYLIC ACID (2-MERCAPTO-ETHYL)-AMIDE (Endopeptidase activity);3-[2-(2-BENZYLOXYCARBONYLAMINO-3-METHYL-BUTYRYLAMINO)-PROPIONYLAMINO]-4-OXO-PENTANOIC ACID (Endopeptidase …	(M267)PID ANTHRAX PATHWAY; (M110)PID IL1 PATHWAY; (M161)PID IFNG PATHWAY	(M5911)HALLMARK INTERFERON ALPHA RESPONSE; (M5902)HALLMARK APOPTOSIS; (M5913)HALLMARK INTERFERON GAMMA RESPONSE	0.0	1.0	0.0	1.0	0.0	0.0	0.0	1.0	0.0	0.0	0.0	0.0	1.0	1.0	0.0	0.0	0.0	0.0	0.0	0.0
CASP10	843	symbol	H. sapiens	843	H. sapiens	CASP10	caspase 10	GO:0006919 activation of cysteine-type endopeptidase activity involved in apoptotic process;GO:0043280 positive regulation of cysteine-type endopeptidase activity involved in apoptotic process;GO:2001056 positive regulation of cysteine-type endopeptidase activity		Enzymes/{ENZYME proteins/Hydrolases,Peptidases/Cysteine-type peptidases}	Golgi apparatus;Vesicles(Approved)		(M7997)SA CASPASE CASCADE; (M79)PID TRAIL PATHWAY; (M94)PID FAS PATHWAY	(M5921)HALLMARK COMPLEMENT	0.0	0.0	0.0	0.0	0.0	0.0	0.0	0.0	0.0	0.0	0.0	0.0	1.0	0.0	0.0	0.0	0.0	1.0	0.0	0.0
CASP16	197350	gene_synonym	H. sapiens	197350	H. sapiens	CASP16P	caspase 16, pseudogene								0.0	0.0	0.0	0.0	0.0	0.0	0.0	0.0	0.0	0.0	0.0	0.0	0.0	0.0	0.0	0.0	0.0	0.0	0.0	0.0
CASP4	837	symbol	H. sapiens	837	H. sapiens	CASP4	caspase 4	GO:1903265 positive regulation of tumor necrosis factor-mediated signaling pathway;GO:0006919 activation of cysteine-type endopeptidase activity involved in apoptotic process;GO:0010803 regulation of tumor necrosis factor-mediated signaling pathway		Enzymes/{ENZYME proteins/Hydrolases,Peptidases/Cysteine-type peptidases}	Cytosol;Plasma membrane(Approved)		(M220)PID CASPASE PATHWAY	(M5902)HALLMARK APOPTOSIS; (M5921)HALLMARK COMPLEMENT; (M5913)HALLMARK INTERFERON GAMMA RESPONSE	0.0	1.0	0.0	0.0	0.0	0.0	0.0	0.0	0.0	0.0	0.0	0.0	0.0	1.0	0.0	0.0	0.0	0.0	0.0	0.0
CASP5	838	symbol	H. sapiens	838	H. sapiens	CASP5	caspase 5	GO:0006919 activation of cysteine-type endopeptidase activity involved in apoptotic process;GO:0021762 substantia nigra development;GO:0043280 positive regulation of cysteine-type endopeptidase activity involved in apoptotic process		Enzymes/{ENZYME proteins/Hydrolases,Peptidases/Cysteine-type peptidases}				(M5921)HALLMARK COMPLEMENT	0.0	0.0	0.0	0.0	0.0	0.0	0.0	0.0	0.0	0.0	0.0	0.0	0.0	1.0	0.0	0.0	0.0	0.0	0.0	0.0
CASP8	841	symbol	H. sapiens	841	H. sapiens	CASP8	caspase 8	GO:0039650 suppression by virus of host cysteine-type endopeptidase activity involved in apoptotic process;GO:0039513 suppression by virus of host catalytic activity;GO:0039516 modulation by virus of host catalytic activity		Enzymes/{ENZYME proteins/Hydrolases,Peptidases/Cysteine-type peptidases}	Cytosol(Enhanced)Nucleoplasm(Approved)		(M5060)SA FAS SIGNALING; (M7997)SA CASPASE CASCADE; (M79)PID TRAIL PATHWAY	(M5911)HALLMARK INTERFERON ALPHA RESPONSE; (M5902)HALLMARK APOPTOSIS; (M5913)HALLMARK INTERFERON GAMMA RESPONSE	0.0	1.0	1.0	1.0	0.0	0.0	1.0	1.0	1.0	0.0	0.0	0.0	1.0	0.0	0.0	0.0	0.0	1.0	1.0	0.0
CASS4	57091	symbol	H. sapiens	57091	H. sapiens	CASS4	Cas scaffold protein family member 4	GO:0090527 actin filament reorganization;GO:1900026 positive regulation of substrate adhesion-dependent cell spreading;GO:0061098 positive regulation of protein tyrosine kinase activity							0.0	0.0	1.0	0.0	1.0	0.0	0.0	0.0	0.0	0.0	0.0	0.0	0.0	0.0	0.0	0.0	0.0	0.0	0.0	0.0
CAST	831	symbol	H. sapiens	831	H. sapiens	CAST	calpastatin	GO:2000675 negative regulation of type B pancreatic cell apoptotic process;GO:0097340 inhibition of cysteine-type endopeptidase activity;GO:0097341 zymogen inhibition			Cytosol;Endoplasmic reticulum(Enhanced)	Calcium (Poly(a) rna binding)		(M5945)HALLMARK HEME METABOLISM	0.0	0.0	0.0	0.0	0.0	0.0	0.0	0.0	0.0	0.0	0.0	1.0	0.0	0.0	0.0	0.0	0.0	0.0	0.0	0.0
CATIP	375307	symbol	H. sapiens	375307	H. sapiens	CATIP	ciliogenesis associated TTC17 interacting protein	GO:0030041 actin filament polymerization;GO:0008154 actin polymerization or depolymerization;GO:0051258 protein polymerization							0.0	0.0	0.0	0.0	0.0	0.0	0.0	0.0	0.0	0.0	0.0	0.0	0.0	0.0	0.0	0.0	0.0	0.0	0.0	0.0
CATSPER1	117144	symbol	H. sapiens	117144	H. sapiens	CATSPER1	cation channel sperm associated 1	GO:0060296 regulation of cilium beat frequency involved in ciliary motility;GO:0060295 regulation of cilium movement involved in cell motility;GO:1902019 regulation of cilium-dependent cell motility							0.0	0.0	0.0	0.0	0.0	0.0	0.0	0.0	0.0	0.0	0.0	0.0	0.0	0.0	0.0	0.0	0.0	0.0	0.0	0.0
CATSPERB	79820	symbol	H. sapiens	79820	H. sapiens	CATSPERB	cation channel sperm associated auxiliary subunit beta	GO:0035036 sperm-egg recognition;GO:0032570 response to progesterone;GO:0007338 single fertilization		Transporters/Transporter channels and pores	Vesicles(Uncertain)				0.0	0.0	0.0	0.0	0.0	0.0	0.0	0.0	0.0	0.0	0.0	0.0	0.0	0.0	0.0	0.0	0.0	0.0	0.0	0.0
CBLC	23624	symbol	H. sapiens	23624	H. sapiens	CBLC	Cbl proto-oncogene C	GO:0007175 negative regulation of epidermal growth factor-activated receptor activity;GO:0007176 regulation of epidermal growth factor-activated receptor activity;GO:0061099 negative regulation of protein tyrosine kinase activity		Enzymes/ENZYME proteins/Transferases	Nucleoplasm(Approved)				0.0	0.0	0.0	0.0	0.0	0.0	0.0	0.0	0.0	0.0	0.0	0.0	0.0	0.0	0.0	0.0	0.0	0.0	0.0	0.0
CCDC17	149483	symbol	H. sapiens	149483	H. sapiens	CCDC17	coiled-coil domain containing 17								0.0	0.0	0.0	0.0	0.0	0.0	0.0	0.0	0.0	0.0	0.0	0.0	0.0	0.0	0.0	0.0	0.0	0.0	0.0	0.0
CCDC170	80129	symbol	H. sapiens	80129	H. sapiens	CCDC170	coiled-coil domain containing 170				Cell Junctions;Golgi apparatus(Approved)				0.0	0.0	0.0	0.0	0.0	0.0	0.0	0.0	0.0	0.0	0.0	0.0	0.0	0.0	0.0	0.0	0.0	0.0	0.0	0.0
CCDC57	284001	symbol	H. sapiens	284001	H. sapiens	CCDC57	coiled-coil domain containing 57				Cytosol;Microtubule organizing center;Microtubules(Approved)				0.0	0.0	0.0	0.0	0.0	0.0	0.0	0.0	0.0	0.0	0.0	0.0	0.0	0.0	0.0	0.0	0.0	0.0	0.0	0.0
CCDC88B	283234	symbol	H. sapiens	283234	H. sapiens	CCDC88B	coiled-coil domain containing 88B	GO:0042102 positive regulation of T cell proliferation;GO:0042832 defense response to protozoan;GO:0050671 positive regulation of lymphocyte proliferation			Centrosome;Cytosol;Nucleoplasm(Approved)				0.0	0.0	1.0	1.0	0.0	0.0	0.0	0.0	0.0	0.0	0.0	0.0	0.0	0.0	0.0	0.0	0.0	0.0	0.0	0.0
CCL13	6357	symbol	H. sapiens	6357	H. sapiens	CCL13	C-C motif chemokine ligand 13	GO:0048245 eosinophil chemotaxis;GO:0072677 eosinophil migration;GO:0030593 neutrophil chemotaxis					(M19043)ST ADRENERGIC; (M5883)NABA SECRETED FACTORS; (M5885)NABA MATRISOME ASSOCIATED	(M5950)HALLMARK ALLOGRAFT REJECTION	0.0	1.0	0.0	0.0	1.0	0.0	0.0	0.0	0.0	0.0	0.0	0.0	0.0	0.0	0.0	1.0	0.0	0.0	0.0	0.0
CCL2	6347	symbol	H. sapiens	6347	H. sapiens	CCL2	C-C motif chemokine ligand 2	GO:2000502 negative regulation of natural killer cell chemotaxis;GO:1901624 negative regulation of lymphocyte chemotaxis;GO:0035684 helper T cell extravasation			Golgi apparatus;Vesicles(Approved)	Mimosine;Danazol	(M65)PID FRA PATHWAY; (M22)PID GMCSF PATHWAY; (M196)PID IL23 PATHWAY	(M5922)HALLMARK UNFOLDED PROTEIN RESPONSE; (M5932)HALLMARK INFLAMMATORY RESPONSE; (M5913)HALLMARK INTERFERON GAMMA RESPONSE	0.0	1.0	1.0	0.0	1.0	0.0	0.0	1.0	0.0	0.0	1.0	0.0	1.0	0.0	0.0	1.0	1.0	1.0	0.0	0.0
CCL20	6364	symbol	H. sapiens	6364	H. sapiens	CCL20	C-C motif chemokine ligand 20	GO:0072679 thymocyte migration;GO:2000406 positive regulation of T cell migration;GO:2000403 positive regulation of lymphocyte migration					(M5883)NABA SECRETED FACTORS; (M5885)NABA MATRISOME ASSOCIATED; (M5889)NABA MATRISOME	(M5932)HALLMARK INFLAMMATORY RESPONSE; (M5953)HALLMARK KRAS SIGNALING UP; (M5890)HALLMARK TNFA SIGNALING VIA NFKB	0.0	1.0	0.0	0.0	1.0	0.0	0.0	1.0	0.0	0.0	0.0	0.0	1.0	0.0	0.0	1.0	0.0	1.0	0.0	0.0
CCL26	10344	symbol	H. sapiens	10344	H. sapiens	CCL26	C-C motif chemokine ligand 26	GO:0010818 T cell chemotaxis;GO:0030593 neutrophil chemotaxis;GO:0030838 positive regulation of actin filament polymerization					(M28)PID IL4 2PATHWAY; (M5883)NABA SECRETED FACTORS; (M5885)NABA MATRISOME ASSOCIATED		0.0	1.0	0.0	0.0	1.0	0.0	0.0	0.0	0.0	0.0	0.0	0.0	0.0	1.0	0.0	1.0	0.0	0.0	0.0	0.0
CCL5	6352	symbol	H. sapiens	6352	H. sapiens	CCL5	C-C motif chemokine ligand 5	GO:0010536 positive regulation of activation of Janus kinase activity;GO:2000503 positive regulation of natural killer cell chemotaxis;GO:0043922 negative regulation by host of viral transcription				Heparin Disaccharide I-S (Receptor signaling protein tyrosine kinase activator activity);Heparin Disaccharide Iii-S (Receptor signaling protein tyrosine kinase activator activity)	(M165)PID SYNDECAN 4 PATHWAY; (M198)PID SYNDECAN 1 PATHWAY; (M254)PID MYC REPRESS PATHWAY	(M5932)HALLMARK INFLAMMATORY RESPONSE; (M5913)HALLMARK INTERFERON GAMMA RESPONSE; (M5921)HALLMARK COMPLEMENT	1.0	1.0	1.0	1.0	1.0	0.0	0.0	1.0	1.0	0.0	0.0	0.0	1.0	1.0	0.0	1.0	0.0	1.0	0.0	0.0
CCL7	6354	symbol	H. sapiens	6354	H. sapiens	CCL7	C-C motif chemokine ligand 7	GO:2000503 positive regulation of natural killer cell chemotaxis;GO:2000501 regulation of natural killer cell chemotaxis;GO:0140131 positive regulation of lymphocyte chemotaxis					(M5883)NABA SECRETED FACTORS; (M5885)NABA MATRISOME ASSOCIATED; (M5889)NABA MATRISOME	(M5897)HALLMARK IL6 JAK STAT3 SIGNALING; (M5913)HALLMARK INTERFERON GAMMA RESPONSE; (M5932)HALLMARK INFLAMMATORY RESPONSE	0.0	1.0	0.0	0.0	1.0	0.0	0.0	0.0	0.0	0.0	0.0	0.0	0.0	1.0	0.0	1.0	0.0	1.0	0.0	0.0
CCL8	6355	symbol	H. sapiens	6355	H. sapiens	CCL8	C-C motif chemokine ligand 8	GO:0044828 negative regulation by host of viral genome replication;GO:0044827 modulation by host of viral genome replication;GO:0044793 negative regulation by host of viral process				Pyroglutamic Acid (Protein kinase activity)	(M5883)NABA SECRETED FACTORS; (M5885)NABA MATRISOME ASSOCIATED; (M5889)NABA MATRISOME		0.0	1.0	1.0	0.0	1.0	0.0	0.0	0.0	0.0	0.0	1.0	0.0	0.0	0.0	0.0	1.0	0.0	0.0	0.0	0.0
CCR1	1230	symbol	H. sapiens	1230	H. sapiens	CCR1	C-C motif chemokine receptor 1	GO:0090026 positive regulation of monocyte chemotaxis;GO:0045672 positive regulation of osteoclast differentiation;GO:0071677 positive regulation of mononuclear cell migration		CD markers;G-protein coupled receptors/{Chemokines and chemotactic factors receptors,GPCRs excl olfactory receptors}				(M5897)HALLMARK IL6 JAK STAT3 SIGNALING; (M5950)HALLMARK ALLOGRAFT REJECTION	0.0	1.0	1.0	0.0	1.0	0.0	0.0	0.0	0.0	0.0	0.0	0.0	0.0	1.0	0.0	0.0	0.0	1.0	1.0	1.0
CCR2	729230	symbol	H. sapiens	729230	H. sapiens	CCR2	C-C motif chemokine receptor 2	GO:0043310 negative regulation of eosinophil degranulation;GO:2000451 positive regulation of CD8-positive, alpha-beta T cell extravasation;GO:2000464 positive regulation of astrocyte chemotaxis		CD markers;G-protein coupled receptors/{Chemokines and chemotactic factors receptors,GPCRs excl olfactory receptors}		INCB3284 (Protein homodimerization activity);CCX915 (Protein homodimerization activity);MLN-1202 (Protein homodimerization activity)		(M5950)HALLMARK ALLOGRAFT REJECTION	1.0	1.0	1.0	1.0	1.0	1.0	0.0	0.0	1.0	1.0	1.0	0.0	0.0	1.0	0.0	0.0	0.0	1.0	0.0	1.0
CCR3	1232	symbol	H. sapiens	1232	H. sapiens	CCR3	C-C motif chemokine receptor 3	GO:0045766 positive regulation of angiogenesis;GO:0070098 chemokine-mediated signaling pathway;GO:0007204 positive regulation of cytosolic calcium ion concentration		CD markers;G-protein coupled receptors/{Chemokines and chemotactic factors receptors,GPCRs excl olfactory receptors}					0.0	1.0	0.0	0.0	1.0	0.0	0.0	0.0	0.0	0.0	0.0	0.0	0.0	0.0	0.0	0.0	0.0	0.0	0.0	0.0
CCR4	1233	symbol	H. sapiens	1233	H. sapiens	CCR4	C-C motif chemokine receptor 4	GO:0050927 positive regulation of positive chemotaxis;GO:0050926 regulation of positive chemotaxis;GO:0070098 chemokine-mediated signaling pathway		CD markers;G-protein coupled receptors/{Chemokines and chemotactic factors receptors,GPCRs excl olfactory receptors}				(M5947)HALLMARK IL2 STAT5 SIGNALING	0.0	1.0	0.0	0.0	1.0	0.0	0.0	1.0	0.0	0.0	0.0	0.0	0.0	1.0	0.0	0.0	0.0	0.0	0.0	0.0
CCR5	1234	symbol	H. sapiens	1234	H. sapiens	CCR5	C-C motif chemokine receptor 5 (gene/pseudogene)	GO:0014808 release of sequestered calcium ion into cytosol by sarcoplasmic reticulum;GO:0019064 fusion of virus membrane with host plasma membrane;GO:1903514 release of sequestered calcium ion into cytosol by endoplasmic reticulum		CD markers;G-protein coupled receptors/{Chemokines and chemotactic factors receptors,GPCRs excl olfactory receptors}		Maraviroc (Virus receptor activity);INCB9471 (Virus receptor activity);AMD-070 (Virus receptor activity)	(M54)PID IL12 2PATHWAY	(M5950)HALLMARK ALLOGRAFT REJECTION	0.0	1.0	0.0	0.0	1.0	0.0	0.0	1.0	0.0	0.0	0.0	0.0	1.0	0.0	0.0	0.0	0.0	1.0	0.0	0.0
CCR7	1236	symbol	H. sapiens	1236	H. sapiens	CCR7	C-C motif chemokine receptor 7	GO:2000525 positive regulation of T cell costimulation;GO:2000526 positive regulation of glycoprotein biosynthetic process involved in immunological synapse formation;GO:0038115 chemokine (C-C motif) ligand 19 signaling pathway		CD markers;G-protein coupled receptors/{Chemokines and chemotactic factors receptors,GPCRs excl olfactory receptors}	Mitochondria(Supported)			(M5932)HALLMARK INFLAMMATORY RESPONSE	0.0	1.0	1.0	1.0	1.0	0.0	1.0	1.0	1.0	0.0	0.0	0.0	1.0	1.0	0.0	0.0	0.0	0.0	1.0	0.0
CD109	135228	symbol	H. sapiens	135228	H. sapiens	CD109	CD109 molecule	GO:0072675 osteoclast fusion;GO:0072674 multinuclear osteoclast differentiation;GO:0010839 negative regulation of keratinocyte proliferation		CD markers			(M3468)NABA ECM REGULATORS; (M5885)NABA MATRISOME ASSOCIATED; (M5889)NABA MATRISOME		1.0	0.0	1.0	0.0	0.0	0.0	0.0	0.0	0.0	0.0	1.0	0.0	0.0	0.0	0.0	1.0	0.0	0.0	1.0	1.0
CD14	929	symbol	H. sapiens	929	H. sapiens	CD14	CD14 molecule	GO:0034128 negative regulation of MyD88-independent toll-like receptor signaling pathway;GO:0038124 toll-like receptor TLR6:TLR2 signaling pathway;GO:0034127 regulation of MyD88-independent toll-like receptor signaling pathway		CD markers	Vesicles(Supported)		(M264)PID TOLL ENDOGENOUS PATHWAY; (M277)PID INTEGRIN A4B1 PATHWAY; (M18)PID INTEGRIN1 PATHWAY	(M5897)HALLMARK IL6 JAK STAT3 SIGNALING; (M5902)HALLMARK APOPTOSIS; (M5932)HALLMARK INFLAMMATORY RESPONSE	1.0	0.0	0.0	1.0	0.0	0.0	1.0	1.0	1.0	0.0	1.0	0.0	1.0	0.0	1.0	0.0	0.0	0.0	0.0	0.0
CD163	9332	symbol	H. sapiens	9332	H. sapiens	CD163	CD163 molecule	GO:0006953 acute-phase response;GO:0002526 acute inflammatory response;GO:0006898 receptor-mediated endocytosis		CD markers	Plasma membrane(Approved)	WF10 (Scavenger receptor activity)			0.0	0.0	0.0	0.0	0.0	0.0	0.0	0.0	0.0	0.0	0.0	0.0	0.0	0.0	0.0	0.0	0.0	0.0	0.0	0.0
CD1A	909	symbol	H. sapiens	909	H. sapiens	CD1A	CD1a molecule	GO:0048006 antigen processing and presentation, endogenous lipid antigen via MHC class Ib;GO:0048007 antigen processing and presentation, exogenous lipid antigen via MHC class Ib;GO:0048003 antigen processing and presentation of lipid antigen via MHC class Ib		CD markers		Anti-thymocyte Globulin (Rabbit) (Lipopeptide binding)			0.0	0.0	0.0	0.0	0.0	1.0	0.0	0.0	0.0	0.0	0.0	0.0	1.0	0.0	1.0	0.0	0.0	0.0	0.0	0.0
CD1D	912	symbol	H. sapiens	912	H. sapiens	CD1D	CD1d molecule	GO:0048006 antigen processing and presentation, endogenous lipid antigen via MHC class Ib;GO:0048007 antigen processing and presentation, exogenous lipid antigen via MHC class Ib;GO:0048003 antigen processing and presentation of lipid antigen via MHC class Ib		CD markers	Endoplasmic reticulum(Supported)	Cis-tetracosenoyl sulfatide (Receptor activity)		(M5935)HALLMARK FATTY ACID METABOLISM; (M5950)HALLMARK ALLOGRAFT REJECTION	0.0	0.0	1.0	0.0	0.0	1.0	0.0	1.0	1.0	0.0	0.0	0.0	1.0	0.0	1.0	0.0	0.0	0.0	0.0	0.0
CD2	914	symbol	H. sapiens	914	H. sapiens	CD2	CD2 molecule	GO:0030887 positive regulation of myeloid dendritic cell activation;GO:0001766 membrane raft polarization;GO:1902715 positive regulation of interferon-gamma secretion		CD markers		Alefacept (Receptor binding)		(M5902)HALLMARK APOPTOSIS; (M5950)HALLMARK ALLOGRAFT REJECTION	1.0	0.0	1.0	1.0	1.0	0.0	0.0	0.0	0.0	0.0	0.0	0.0	1.0	0.0	0.0	0.0	0.0	0.0	0.0	1.0
CD200R1	131450	symbol	H. sapiens	131450	H. sapiens	CD200R1	CD200 receptor 1	GO:2000405 negative regulation of T cell migration;GO:1900165 negative regulation of interleukin-6 secretion;GO:1905522 negative regulation of macrophage migration			Plasma membrane(Supported)				0.0	0.0	0.0	1.0	1.0	0.0	1.0	0.0	0.0	0.0	1.0	0.0	0.0	1.0	1.0	0.0	0.0	0.0	0.0	0.0
CD209	30835	symbol	H. sapiens	30835	H. sapiens	CD209	CD209 molecule	GO:0097323 B cell adhesion;GO:0046968 peptide antigen transport;GO:0019062 virion attachment to host cell		CD markers			(M5880)NABA ECM AFFILIATED; (M5885)NABA MATRISOME ASSOCIATED; (M5889)NABA MATRISOME	(M5915)HALLMARK APICAL JUNCTION	0.0	0.0	1.0	0.0	0.0	1.0	1.0	0.0	1.0	0.0	0.0	0.0	1.0	0.0	1.0	1.0	0.0	0.0	0.0	0.0
CD226	10666	symbol	H. sapiens	10666	H. sapiens	CD226	CD226 molecule	GO:0002860 positive regulation of natural killer cell mediated cytotoxicity directed against tumor cell target;GO:0050862 positive regulation of T cell receptor signaling pathway;GO:0060369 positive regulation of Fc receptor mediated stimulatory signaling pathway		CD markers	Midbody(Approved)				1.0	0.0	1.0	1.0	0.0	1.0	1.0	0.0	1.0	0.0	0.0	0.0	1.0	0.0	1.0	0.0	0.0	0.0	0.0	0.0
CD244	51744	symbol	H. sapiens	51744	H. sapiens	CD244	CD244 molecule	GO:1902715 positive regulation of interferon-gamma secretion;GO:0071663 positive regulation of granzyme B production;GO:2000484 positive regulation of interleukin-8 secretion		CD markers					1.0	0.0	1.0	1.0	1.0	1.0	0.0	0.0	0.0	1.0	0.0	0.0	0.0	0.0	0.0	0.0	0.0	0.0	0.0	1.0
CD27	939	symbol	H. sapiens	939	H. sapiens	CD27	CD27 molecule	GO:0045579 positive regulation of B cell differentiation;GO:0070233 negative regulation of T cell apoptotic process;GO:0045577 regulation of B cell differentiation		CD markers					0.0	1.0	1.0	0.0	0.0	1.0	0.0	0.0	0.0	0.0	0.0	0.0	0.0	0.0	0.0	0.0	0.0	0.0	0.0	0.0
CD274	29126	symbol	H. sapiens	29126	H. sapiens	CD274	CD274 molecule	GO:0002845 positive regulation of tolerance induction to tumor cell;GO:1905404 positive regulation of activated CD8-positive, alpha-beta T cell apoptotic process;GO:0002843 regulation of tolerance induction to tumor cell		CD markers	Cytosol(Approved)	Atezolizumab		(M5913)HALLMARK INTERFERON GAMMA RESPONSE; (M5915)HALLMARK APICAL JUNCTION	0.0	0.0	1.0	1.0	1.0	1.0	0.0	1.0	0.0	1.0	1.0	0.0	1.0	0.0	1.0	0.0	0.0	0.0	0.0	0.0
CD2AP	23607	symbol	H. sapiens	23607	H. sapiens	CD2AP	CD2 associated protein	GO:0032911 negative regulation of transforming growth factor beta1 production;GO:0032908 regulation of transforming growth factor beta1 production;GO:0071635 negative regulation of transforming growth factor beta production			Cytosol;Plasma membrane(Enhanced)		(M226)PID VEGFR1 PATHWAY; (M193)PID NEPHRIN NEPH1 PATHWAY	(M5893)HALLMARK MITOTIC SPINDLE	0.0	0.0	0.0	1.0	0.0	0.0	0.0	0.0	0.0	0.0	0.0	0.0	0.0	0.0	0.0	0.0	0.0	0.0	0.0	0.0
CD300A	11314	symbol	H. sapiens	11314	H. sapiens	CD300A	CD300a molecule	GO:0034125 negative regulation of MyD88-dependent toll-like receptor signaling pathway;GO:1902569 negative regulation of activation of Janus kinase activity;GO:0034124 regulation of MyD88-dependent toll-like receptor signaling pathway		CD markers					1.0	0.0	1.0	1.0	1.0	1.0	1.0	0.0	1.0	1.0	1.0	0.0	0.0	0.0	1.0	0.0	0.0	0.0	0.0	0.0
CD300C	10871	symbol	H. sapiens	10871	H. sapiens	CD300C	CD300c molecule	GO:0006968 cellular defense response;GO:0050776 regulation of immune response;GO:0002682 regulation of immune system process		CD markers					0.0	0.0	0.0	0.0	0.0	0.0	0.0	0.0	0.0	0.0	0.0	0.0	0.0	0.0	1.0	0.0	0.0	0.0	0.0	0.0
CD300E	342510	symbol	H. sapiens	342510	H. sapiens	CD300E	CD300e molecule	GO:0050776 regulation of immune response;GO:0045087 innate immune response;GO:0002682 regulation of immune system process		CD markers					0.0	0.0	0.0	0.0	0.0	0.0	0.0	0.0	0.0	0.0	0.0	0.0	0.0	0.0	1.0	0.0	0.0	0.0	0.0	0.0
CD300LB	124599	symbol	H. sapiens	124599	H. sapiens	CD300LB	CD300 molecule like family member b	GO:0050776 regulation of immune response;GO:0045087 innate immune response;GO:0002682 regulation of immune system process		CD markers					0.0	0.0	0.0	0.0	0.0	0.0	0.0	0.0	0.0	0.0	0.0	0.0	0.0	0.0	1.0	0.0	0.0	0.0	0.0	0.0
CD33	945	symbol	H. sapiens	945	H. sapiens	CD33	CD33 molecule	GO:1903615 positive regulation of protein tyrosine phosphatase activity;GO:1903613 regulation of protein tyrosine phosphatase activity;GO:0002765 immune response-inhibiting signal transduction		CD markers	Plasma membrane(Supported)Nucleus(Approved)	Gemtuzumab ozogamicin (Receptor activity)			1.0	0.0	0.0	1.0	0.0	0.0	1.0	0.0	0.0	0.0	1.0	0.0	1.0	0.0	1.0	0.0	0.0	0.0	0.0	0.0
CD37	951	symbol	H. sapiens	951	H. sapiens	CD37	CD37 molecule			CD markers				(M5953)HALLMARK KRAS SIGNALING UP	0.0	0.0	0.0	0.0	0.0	0.0	0.0	0.0	0.0	0.0	0.0	0.0	1.0	0.0	0.0	0.0	0.0	0.0	0.0	0.0
CD3D	915	symbol	H. sapiens	915	H. sapiens	CD3D	CD3d molecule	GO:0045059 positive thymic T cell selection;GO:0045061 thymic T cell selection;GO:0043368 positive T cell selection		CD markers		Muromonab (Transmembrane signaling receptor activity);Blinatumomab (Transmembrane signaling receptor activity)	(M290)PID IL12 STAT4 PATHWAY; (M9526)ST T CELL SIGNAL TRANSDUCTION; (M88)PID CD8 TCR PATHWAY	(M5950)HALLMARK ALLOGRAFT REJECTION	0.0	0.0	1.0	0.0	0.0	1.0	1.0	0.0	0.0	0.0	0.0	0.0	1.0	0.0	1.0	0.0	0.0	0.0	0.0	0.0
CD3E	916	symbol	H. sapiens	916	H. sapiens	CD3E	CD3e molecule	GO:0002669 positive regulation of T cell anergy;GO:0045060 negative thymic T cell selection;GO:0002913 positive regulation of lymphocyte anergy		CD markers		Muromonab (Transmembrane signaling receptor activity)	(M290)PID IL12 STAT4 PATHWAY; (M196)PID IL23 PATHWAY; (M88)PID CD8 TCR PATHWAY	(M5950)HALLMARK ALLOGRAFT REJECTION	0.0	0.0	1.0	1.0	0.0	1.0	1.0	0.0	0.0	1.0	0.0	0.0	1.0	0.0	1.0	0.0	0.0	0.0	0.0	0.0
CD4	920	symbol	H. sapiens	920	H. sapiens	CD4	CD4 molecule	GO:0019064 fusion of virus membrane with host plasma membrane;GO:0006948 induction by virus of host cell-cell fusion;GO:0046598 positive regulation of viral entry into host cell		CD markers	Plasma membrane(Supported)	Anti-thymocyte Globulin (Rabbit) (Zinc ion binding)	(M243)PID ARF 3PATHWAY; (M290)PID IL12 STAT4 PATHWAY; (M196)PID IL23 PATHWAY	(M5950)HALLMARK ALLOGRAFT REJECTION	0.0	1.0	1.0	1.0	0.0	1.0	1.0	1.0	0.0	0.0	0.0	0.0	1.0	0.0	1.0	0.0	0.0	0.0	1.0	0.0
CD40	958	symbol	H. sapiens	958	H. sapiens	CD40	CD40 molecule	GO:0048304 positive regulation of isotype switching to IgG isotypes;GO:0048302 regulation of isotype switching to IgG isotypes;GO:0045830 positive regulation of isotype switching		CD markers			(M45)PID CD40 PATHWAY; (M12705)SIG CD40PATHWAYMAP	(M5932)HALLMARK INFLAMMATORY RESPONSE; (M5913)HALLMARK INTERFERON GAMMA RESPONSE; (M5950)HALLMARK ALLOGRAFT REJECTION	1.0	1.0	1.0	1.0	1.0	1.0	1.0	1.0	0.0	1.0	0.0	0.0	1.0	0.0	1.0	0.0	0.0	0.0	0.0	1.0
CD40LG	959	symbol	H. sapiens	959	H. sapiens	CD40LG	CD40 ligand	GO:0045190 isotype switching;GO:0007257 activation of JUN kinase activity;GO:0002204 somatic recombination of immunoglobulin genes involved in immune response		CD markers			(M169)PID INTEGRIN2 PATHWAY; (M235)PID TCR CALCIUM PATHWAY; (M45)PID CD40 PATHWAY	(M5956)HALLMARK KRAS SIGNALING DN; (M5921)HALLMARK COMPLEMENT; (M5950)HALLMARK ALLOGRAFT REJECTION	1.0	1.0	1.0	1.0	0.0	1.0	0.0	0.0	0.0	1.0	0.0	0.0	1.0	0.0	1.0	0.0	0.0	0.0	0.0	1.0
CD44	960	symbol	H. sapiens	960	H. sapiens	CD44	CD44 molecule (Indian blood group)	GO:1900625 positive regulation of monocyte aggregation;GO:1900623 regulation of monocyte aggregation;GO:1902166 negative regulation of intrinsic apoptotic signaling pathway in response to DNA damage by p53 class mediator		Blood group antigen proteins;CD markers	Golgi apparatus;Plasma membrane(Enhanced)	Hyaluronic acid (Hyalurononglucosaminidase activity)	(M11736)SA MMP CYTOKINE CONNECTION; (M63)PID AVB3 OPN PATHWAY	(M5897)HALLMARK IL6 JAK STAT3 SIGNALING; (M5902)HALLMARK APOPTOSIS; (M5947)HALLMARK IL2 STAT5 SIGNALING	1.0	1.0	1.0	0.0	1.0	0.0	0.0	0.0	0.0	0.0	0.0	1.0	1.0	0.0	0.0	0.0	0.0	0.0	0.0	1.0
CD46	4179	symbol	H. sapiens	4179	H. sapiens	CD46	CD46 molecule	GO:0043382 positive regulation of memory T cell differentiation;GO:0043380 regulation of memory T cell differentiation;GO:0045591 positive regulation of regulatory T cell differentiation		CD markers	Plasma membrane(Approved)			(M5921)HALLMARK COMPLEMENT	1.0	0.0	1.0	1.0	0.0	1.0	1.0	0.0	0.0	1.0	0.0	0.0	0.0	1.0	0.0	0.0	0.0	0.0	0.0	0.0
CD5	921	symbol	H. sapiens	921	H. sapiens	CD5	CD5 molecule	GO:0031295 T cell costimulation;GO:0031294 lymphocyte costimulation;GO:0050870 positive regulation of T cell activation		CD markers					0.0	0.0	1.0	0.0	0.0	0.0	0.0	0.0	0.0	0.0	0.0	0.0	1.0	0.0	0.0	0.0	0.0	0.0	0.0	0.0
CD53	963	symbol	H. sapiens	963	H. sapiens	CD53	CD53 molecule	GO:1901741 positive regulation of myoblast fusion;GO:1901739 regulation of myoblast fusion;GO:0060143 positive regulation of syncytium formation by plasma membrane fusion		CD markers;Transporters/Accessory Factors Involved in Transport					1.0	0.0	0.0	0.0	0.0	0.0	0.0	0.0	0.0	0.0	0.0	0.0	0.0	0.0	0.0	0.0	0.0	0.0	0.0	0.0
CD6	923	symbol	H. sapiens	923	H. sapiens	CD6	CD6 molecule	GO:1900017 positive regulation of cytokine production involved in inflammatory response;GO:0031663 lipopolysaccharide-mediated signaling pathway;GO:0042102 positive regulation of T cell proliferation		CD markers					0.0	0.0	1.0	1.0	0.0	1.0	0.0	1.0	1.0	0.0	0.0	0.0	1.0	1.0	0.0	0.0	0.0	0.0	0.0	0.0
CD68	968	symbol	H. sapiens	968	H. sapiens	CD68	CD68 molecule	GO:0002605 negative regulation of dendritic cell antigen processing and presentation;GO:0002578 negative regulation of antigen processing and presentation;GO:0002604 regulation of dendritic cell antigen processing and presentation		CD markers	Vesicles(Supported)Golgi apparatus(Approved)				1.0	0.0	0.0	0.0	0.0	0.0	0.0	1.0	0.0	0.0	1.0	0.0	1.0	0.0	0.0	0.0	0.0	0.0	0.0	0.0
CD7	924	symbol	H. sapiens	924	H. sapiens	CD7	CD7 molecule	GO:0042110 T cell activation;GO:0002250 adaptive immune response;GO:0046649 lymphocyte activation		CD markers			(M8873)ST FAS SIGNALING PATHWAY	(M5950)HALLMARK ALLOGRAFT REJECTION	0.0	0.0	1.0	0.0	0.0	1.0	0.0	0.0	0.0	0.0	0.0	0.0	1.0	0.0	0.0	0.0	0.0	0.0	0.0	0.0
CD70	970	symbol	H. sapiens	970	H. sapiens	CD70	CD70 molecule	GO:0042102 positive regulation of T cell proliferation;GO:0050671 positive regulation of lymphocyte proliferation;GO:0050870 positive regulation of T cell activation		CD markers	Nucleoplasm(Uncertain)			(M5932)HALLMARK INFLAMMATORY RESPONSE	0.0	1.0	1.0	0.0	0.0	1.0	0.0	0.0	0.0	0.0	0.0	0.0	0.0	0.0	0.0	0.0	0.0	0.0	0.0	0.0
CD72	971	symbol	H. sapiens	971	H. sapiens	CD72	CD72 molecule	GO:0007155 cell adhesion;GO:0022610 biological adhesion;GO:0008150 biological_process		CD markers	Mitochondria;Nucleus(Approved)		(M10)PID BCR 5PATHWAY		0.0	0.0	0.0	0.0	0.0	0.0	0.0	0.0	0.0	0.0	0.0	0.0	0.0	0.0	0.0	0.0	0.0	0.0	0.0	0.0
CD74	972	symbol	H. sapiens	972	H. sapiens	CD74	CD74 molecule	GO:0031394 positive regulation of prostaglandin biosynthetic process;GO:0002906 negative regulation of mature B cell apoptotic process;GO:0046598 positive regulation of viral entry into host cell		CD markers	Golgi apparatus(Supported)			(M5911)HALLMARK INTERFERON ALPHA RESPONSE; (M5950)HALLMARK ALLOGRAFT REJECTION; (M5913)HALLMARK INTERFERON GAMMA RESPONSE	1.0	1.0	1.0	1.0	1.0	1.0	0.0	0.0	0.0	1.0	1.0	0.0	1.0	1.0	1.0	0.0	0.0	0.0	1.0	1.0
CD80	941	symbol	H. sapiens	941	H. sapiens	CD80	CD80 molecule	GO:0045627 positive regulation of T-helper 1 cell differentiation;GO:0045625 regulation of T-helper 1 cell differentiation;GO:0045624 positive regulation of T-helper cell differentiation		CD markers		Abatacept (Virus receptor activity);Galiximab (Virus receptor activity);Belatacept (Virus receptor activity)	(M290)PID IL12 STAT4 PATHWAY; (M88)PID CD8 TCR PATHWAY; (M34)PID TCR PATHWAY	(M5956)HALLMARK KRAS SIGNALING DN; (M5950)HALLMARK ALLOGRAFT REJECTION; (M5890)HALLMARK TNFA SIGNALING VIA NFKB	1.0	1.0	1.0	1.0	0.0	1.0	0.0	1.0	0.0	1.0	1.0	0.0	1.0	0.0	1.0	0.0	0.0	1.0	0.0	0.0
CD84	8832	symbol	H. sapiens	8832	H. sapiens	CD84	CD84 molecule	GO:0043305 negative regulation of mast cell degranulation;GO:0032685 negative regulation of granulocyte macrophage colony-stimulating factor production;GO:0033007 negative regulation of mast cell activation involved in immune response		CD markers					1.0	0.0	1.0	1.0	1.0	1.0	0.0	0.0	0.0	0.0	1.0	0.0	0.0	0.0	0.0	0.0	0.0	0.0	0.0	1.0
CD86	942	symbol	H. sapiens	942	H. sapiens	CD86	CD86 molecule	GO:0045630 positive regulation of T-helper 2 cell differentiation;GO:0043017 positive regulation of lymphotoxin A biosynthetic process;GO:0045628 regulation of T-helper 2 cell differentiation		CD markers		Anti-thymocyte Globulin (Rabbit) (Virus receptor activity);Abatacept (Virus receptor activity);Belatacept (Virus receptor activity)	(M290)PID IL12 STAT4 PATHWAY; (M88)PID CD8 TCR PATHWAY; (M34)PID TCR PATHWAY	(M5947)HALLMARK IL2 STAT5 SIGNALING; (M5950)HALLMARK ALLOGRAFT REJECTION; (M5913)HALLMARK INTERFERON GAMMA RESPONSE	1.0	1.0	1.0	1.0	0.0	1.0	0.0	1.0	0.0	1.0	1.0	0.0	1.0	0.0	1.0	0.0	0.0	1.0	0.0	0.0
CD93	22918	symbol	H. sapiens	22918	H. sapiens	CD93	CD93 molecule	GO:0043312 neutrophil degranulation;GO:0002283 neutrophil activation involved in immune response;GO:0042116 macrophage activation		CD markers	Plasma membrane;Vesicles(Approved)				1.0	0.0	0.0	0.0	0.0	0.0	0.0	0.0	0.0	0.0	0.0	0.0	0.0	0.0	0.0	0.0	0.0	0.0	0.0	0.0
CD96	10225	symbol	H. sapiens	10225	H. sapiens	CD96	CD96 molecule	GO:0002728 negative regulation of natural killer cell cytokine production;GO:0002727 regulation of natural killer cell cytokine production;GO:0002716 negative regulation of natural killer cell mediated immunity		CD markers				(M5950)HALLMARK ALLOGRAFT REJECTION	0.0	0.0	0.0	1.0	0.0	1.0	0.0	1.0	1.0	0.0	1.0	0.0	0.0	0.0	1.0	0.0	0.0	0.0	0.0	0.0
CDCP1	64866	symbol	H. sapiens	64866	H. sapiens	CDCP1	CUB domain containing protein 1			CD markers				(M5947)HALLMARK IL2 STAT5 SIGNALING	0.0	0.0	0.0	0.0	0.0	0.0	0.0	0.0	0.0	0.0	0.0	0.0	0.0	0.0	0.0	0.0	0.0	0.0	0.0	0.0
CDHR4	389118	symbol	H. sapiens	389118	H. sapiens	CDHR4	cadherin related family member 4	GO:0007156 homophilic cell adhesion via plasma membrane adhesion molecules;GO:0098742 cell-cell adhesion via plasma-membrane adhesion molecules;GO:0098609 cell-cell adhesion							0.0	0.0	0.0	0.0	0.0	0.0	0.0	0.0	0.0	0.0	0.0	0.0	0.0	0.0	0.0	0.0	0.0	0.0	0.0	0.0
CDRT4	284040	symbol	H. sapiens	284040	H. sapiens	CDRT4	CMT1A duplicated region transcript 4				Mitochondria(Approved)				0.0	0.0	0.0	0.0	0.0	0.0	0.0	0.0	0.0	0.0	0.0	0.0	0.0	0.0	0.0	0.0	0.0	0.0	0.0	0.0
CEACAM1	634	symbol	H. sapiens	634	H. sapiens	CEACAM1	CEA cell adhesion molecule 1	GO:0043318 negative regulation of cytotoxic T cell degranulation;GO:0002859 negative regulation of natural killer cell mediated cytotoxicity directed against tumor cell target;GO:0043317 regulation of cytotoxic T cell degranulation		CD markers		Arcitumomab (Protein homodimerization activity)			1.0	1.0	1.0	1.0	1.0	1.0	1.0	0.0	1.0	1.0	1.0	1.0	0.0	0.0	0.0	0.0	0.0	0.0	1.0	1.0
CEACAM21	90273	symbol	H. sapiens	90273	H. sapiens	CEACAM21	CEA cell adhesion molecule 21								0.0	0.0	0.0	0.0	0.0	0.0	0.0	0.0	0.0	0.0	0.0	0.0	0.0	0.0	0.0	0.0	0.0	0.0	0.0	0.0
CEACAM3	1084	symbol	H. sapiens	1084	H. sapiens	CEACAM3	CEA cell adhesion molecule 3	GO:0043312 neutrophil degranulation;GO:0002283 neutrophil activation involved in immune response;GO:0042119 neutrophil activation		CD markers					1.0	0.0	0.0	0.0	1.0	0.0	0.0	0.0	0.0	0.0	0.0	0.0	0.0	0.0	0.0	0.0	0.0	0.0	0.0	1.0
CEACAM4	1089	symbol	H. sapiens	1089	H. sapiens	CEACAM4	CEA cell adhesion molecule 4	GO:0006909 phagocytosis;GO:0006897 endocytosis;GO:0098657 import into cell							0.0	0.0	0.0	0.0	0.0	0.0	0.0	0.0	0.0	0.0	0.0	0.0	0.0	0.0	0.0	0.0	0.0	0.0	0.0	0.0
CEBPB	1051	symbol	H. sapiens	1051	H. sapiens	CEBPB	CCAAT enhancer binding protein beta	GO:2000120 positive regulation of sodium-dependent phosphate transport;GO:1901329 regulation of odontoblast differentiation;GO:2000118 regulation of sodium-dependent phosphate transport		Transcription factors/Basic domains	Nucleoplasm(Enhanced)		(M182)PID IL3 PATHWAY; (M229)PID P38 ALPHA BETA DOWNSTREAM PATHWAY; (M161)PID IFNG PATHWAY	(M5922)HALLMARK UNFOLDED PROTEIN RESPONSE; (M5921)HALLMARK COMPLEMENT; (M5890)HALLMARK TNFA SIGNALING VIA NFKB	0.0	0.0	1.0	1.0	0.0	0.0	0.0	1.0	1.0	0.0	1.0	0.0	1.0	1.0	0.0	0.0	0.0	1.0	1.0	0.0
CEBPD	1052	symbol	H. sapiens	1052	H. sapiens	CEBPD	CCAAT enhancer binding protein delta	GO:0045669 positive regulation of osteoblast differentiation;GO:0045778 positive regulation of ossification;GO:0045667 regulation of osteoblast differentiation		Transcription factors/Basic domains	Nucleoplasm(Supported)		(M106)PID HNF3B PATHWAY; (M183)PID IL6 7 PATHWAY; (M236)PID DELTA NP63 PATHWAY	(M5890)HALLMARK TNFA SIGNALING VIA NFKB	0.0	1.0	0.0	0.0	0.0	0.0	0.0	0.0	0.0	0.0	0.0	0.0	0.0	0.0	0.0	0.0	0.0	0.0	0.0	0.0
CECR1	51816	gene_synonym	H. sapiens	51816	H. sapiens	ADA2	adenosine deaminase 2	GO:0006154 adenosine catabolic process;GO:0046103 inosine biosynthetic process;GO:0046130 purine ribonucleoside catabolic process		Enzymes/ENZYME proteins/Hydrolases					1.0	0.0	0.0	0.0	0.0	0.0	0.0	0.0	0.0	0.0	0.0	0.0	0.0	0.0	0.0	0.0	0.0	0.0	0.0	0.0
CEMIP	57214	symbol	H. sapiens	57214	H. sapiens	CEMIP	cell migration inducing hyaluronidase 1	GO:0051281 positive regulation of release of sequestered calcium ion into cytosol;GO:0051279 regulation of release of sequestered calcium ion into cytosol;GO:0010524 positive regulation of calcium ion transport into cytosol		Enzymes/ENZYME proteins/Hydrolases					0.0	0.0	0.0	1.0	1.0	0.0	0.0	0.0	0.0	0.0	0.0	0.0	0.0	0.0	0.0	0.0	0.0	0.0	0.0	0.0
CFB	629	symbol	H. sapiens	629	H. sapiens	CFB	complement factor B	GO:0006957 complement activation, alternative pathway;GO:0030449 regulation of complement activation;GO:2000257 regulation of protein activation cascade		Enzymes/{ENZYME proteins/Hydrolases,Peptidases/Serine-type peptidases}	Cell Junctions;Endoplasmic reticulum;Vesicles(Approved)	4-Guanidinobenzoic Acid (Serine-type endopeptidase activity);Diisopropylphosphono Group (Serine-type endopeptidase activity)	(M14775)ST G ALPHA S PATHWAY; (M16518)ST WNT CA2 CYCLIC GMP PATHWAY; (M15743)ST GA12 PATHWAY	(M5946)HALLMARK COAGULATION; (M5953)HALLMARK KRAS SIGNALING UP; (M5913)HALLMARK INTERFERON GAMMA RESPONSE	0.0	0.0	0.0	0.0	0.0	1.0	1.0	0.0	0.0	0.0	0.0	0.0	1.0	1.0	0.0	0.0	0.0	0.0	0.0	0.0
CFD	1675	symbol	H. sapiens	1675	H. sapiens	CFD	complement factor D	GO:0006957 complement activation, alternative pathway;GO:0002576 platelet degranulation;GO:0043312 neutrophil degranulation		Enzymes/{ENZYME proteins/Hydrolases,Peptidases/Serine-type peptidases}	Plasma membrane(Approved)	2-Aminobenzyl alcohol (Serine-type peptidase activity);3,4-Dichloroisocoumarin (Serine-type peptidase activity)		(M5946)HALLMARK COAGULATION; (M5909)HALLMARK MYOGENESIS	1.0	0.0	0.0	0.0	0.0	0.0	1.0	0.0	0.0	0.0	0.0	0.0	1.0	0.0	0.0	0.0	0.0	0.0	0.0	1.0
CFI	3426	symbol	H. sapiens	3426	H. sapiens	CFI	complement factor I	GO:0006958 complement activation, classical pathway;GO:0030449 regulation of complement activation;GO:0002455 humoral immune response mediated by circulating immunoglobulin		Enzymes/{ENZYME proteins/Hydrolases,Peptidases/Serine-type peptidases}				(M5946)HALLMARK COAGULATION	0.0	0.0	0.0	0.0	0.0	1.0	1.0	0.0	0.0	0.0	0.0	0.0	1.0	1.0	0.0	0.0	0.0	0.0	0.0	0.0
CFLAR	8837	symbol	H. sapiens	8837	H. sapiens	CFLAR	CASP8 and FADD like apoptosis regulator	GO:0072126 positive regulation of glomerular mesangial cell proliferation;GO:0072124 regulation of glomerular mesangial cell proliferation;GO:1901740 negative regulation of myoblast fusion		Enzymes/Peptidases/Cysteine-type peptidases	Cytosol;Nucleus;Plasma membrane(Supported)Nuclear bodies(Approved)		(M5060)SA FAS SIGNALING; (M79)PID TRAIL PATHWAY; (M18030)ST TUMOR NECROSIS FACTOR PATHWAY	(M5902)HALLMARK APOPTOSIS; (M5890)HALLMARK TNFA SIGNALING VIA NFKB	0.0	0.0	0.0	0.0	0.0	0.0	0.0	1.0	0.0	0.0	0.0	1.0	0.0	0.0	0.0	0.0	0.0	1.0	1.0	1.0
CFP	5199	symbol	H. sapiens	5199	H. sapiens	CFP	complement factor properdin	GO:0006957 complement activation, alternative pathway;GO:0030449 regulation of complement activation;GO:0043312 neutrophil degranulation						(M5950)HALLMARK ALLOGRAFT REJECTION; (M5924)HALLMARK MTORC1 SIGNALING	1.0	0.0	0.0	0.0	0.0	1.0	1.0	1.0	0.0	0.0	0.0	0.0	1.0	1.0	0.0	0.0	0.0	0.0	0.0	0.0
CHI3L1	1116	symbol	H. sapiens	1116	H. sapiens	CHI3L1	chitinase 3 like 1	GO:0007250 activation of NF-kappaB-inducing kinase activity;GO:0010800 positive regulation of peptidyl-threonine phosphorylation;GO:0006032 chitin catabolic process							1.0	0.0	0.0	1.0	0.0	0.0	0.0	0.0	0.0	0.0	0.0	0.0	0.0	0.0	0.0	0.0	0.0	0.0	0.0	0.0
CHI3L2	1117	symbol	H. sapiens	1117	H. sapiens	CHI3L2	chitinase 3 like 2	GO:0006032 chitin catabolic process;GO:1901072 glucosamine-containing compound catabolic process;GO:0046348 amino sugar catabolic process							0.0	0.0	0.0	0.0	0.0	0.0	0.0	0.0	0.0	0.0	0.0	0.0	0.0	0.0	0.0	0.0	0.0	0.0	0.0	0.0
CHKB	1120	symbol	H. sapiens	1120	H. sapiens	CHKB	choline kinase beta	GO:0006657 CDP-choline pathway;GO:0006646 phosphatidylethanolamine biosynthetic process;GO:0006656 phosphatidylcholine biosynthetic process		Enzymes/ENZYME proteins/Transferases	Cytosol(Approved)				0.0	0.0	0.0	0.0	0.0	0.0	0.0	0.0	0.0	0.0	0.0	0.0	0.0	0.0	0.0	0.0	0.0	0.0	0.0	0.0
CHL1	10752	symbol	H. sapiens	10752	H. sapiens	CHL1	cell adhesion molecule L1 like	GO:0035640 exploration behavior;GO:0007411 axon guidance;GO:0043524 negative regulation of neuron apoptotic process							0.0	0.0	0.0	0.0	1.0	0.0	0.0	0.0	0.0	0.0	0.0	0.0	0.0	0.0	0.0	0.0	0.0	0.0	0.0	0.0
CHRNA6	8973	symbol	H. sapiens	8973	H. sapiens	CHRNA6	cholinergic receptor nicotinic alpha 6 subunit	GO:0014059 regulation of dopamine secretion;GO:2000300 regulation of synaptic vesicle exocytosis;GO:0014046 dopamine secretion				Nicotine (Acetylcholine-activated cation-selective channel activity);Galantamine (Acetylcholine-activated cation-selective channel activity);Ethanol (Acetylcholine-activated cation-selective channel activity);Varenicline (Acetylcholine-activated cation-selective channel activity);Cytisine (Acetylcholine-activated cation-selective channel activity)			1.0	0.0	0.0	1.0	0.0	0.0	0.0	0.0	0.0	0.0	0.0	0.0	0.0	0.0	0.0	0.0	0.0	0.0	0.0	0.0
CHRNA9	55584	symbol	H. sapiens	55584	H. sapiens	CHRNA9	cholinergic receptor nicotinic alpha 9 subunit	GO:0050910 detection of mechanical stimulus involved in sensory perception of sound;GO:0070373 negative regulation of ERK1 and ERK2 cascade;GO:0060079 excitatory postsynaptic potential				Nicotine (Calcium channel activity);Galantamine (Calcium channel activity);Ethanol (Calcium channel activity);ATG003 (Calcium channel activity);Lobeline (Calcium channel activity);RPI-78M (Calcium channel activity);Tetraethylammonium (Calcium channel activity)			0.0	0.0	0.0	0.0	0.0	0.0	0.0	0.0	0.0	0.0	0.0	0.0	0.0	0.0	0.0	0.0	0.0	0.0	0.0	0.0
CHST13	166012	symbol	H. sapiens	166012	H. sapiens	CHST13	carbohydrate sulfotransferase 13	GO:0030206 chondroitin sulfate biosynthetic process;GO:0030204 chondroitin sulfate metabolic process;GO:0050650 chondroitin sulfate proteoglycan biosynthetic process		Enzymes/ENZYME proteins/Transferases					0.0	0.0	0.0	0.0	0.0	0.0	0.0	0.0	0.0	0.0	0.0	0.0	0.0	0.0	0.0	0.0	0.0	0.0	0.0	0.0
CHST15	51363	symbol	H. sapiens	51363	H. sapiens	CHST15	carbohydrate sulfotransferase 15	GO:0030206 chondroitin sulfate biosynthetic process;GO:0030204 chondroitin sulfate metabolic process;GO:0050650 chondroitin sulfate proteoglycan biosynthetic process		Enzymes/ENZYME proteins/Transferases	Centrosome;Cytosol(Approved)				0.0	0.0	0.0	0.0	0.0	0.0	0.0	0.0	0.0	0.0	0.0	0.0	0.0	0.0	0.0	0.0	0.0	0.0	0.0	0.0
CHST2	9435	symbol	H. sapiens	9435	H. sapiens	CHST2	carbohydrate sulfotransferase 2	GO:0018146 keratan sulfate biosynthetic process;GO:0042339 keratan sulfate metabolic process;GO:0006044 N-acetylglucosamine metabolic process			Golgi apparatus(Supported)			(M5956)HALLMARK KRAS SIGNALING DN; (M5932)HALLMARK INFLAMMATORY RESPONSE; (M5937)HALLMARK GLYCOLYSIS	0.0	0.0	0.0	0.0	0.0	0.0	0.0	0.0	0.0	0.0	0.0	0.0	0.0	0.0	0.0	0.0	0.0	0.0	0.0	0.0
CHST4	10164	symbol	H. sapiens	10164	H. sapiens	CHST4	carbohydrate sulfotransferase 4	GO:0018146 keratan sulfate biosynthetic process;GO:0042339 keratan sulfate metabolic process;GO:0006477 protein sulfation						(M5937)HALLMARK GLYCOLYSIS	0.0	0.0	0.0	0.0	0.0	0.0	0.0	0.0	0.0	0.0	0.0	0.0	0.0	0.0	0.0	0.0	0.0	0.0	0.0	0.0
CHSY3	337876	symbol	H. sapiens	337876	H. sapiens	CHSY3	chondroitin sulfate synthase 3	GO:0030206 chondroitin sulfate biosynthetic process;GO:0030204 chondroitin sulfate metabolic process;GO:0050650 chondroitin sulfate proteoglycan biosynthetic process		Enzymes/ENZYME proteins/Transferases					0.0	0.0	0.0	0.0	0.0	0.0	0.0	0.0	0.0	0.0	0.0	0.0	0.0	0.0	0.0	0.0	0.0	0.0	0.0	0.0
CIDEB	27141	symbol	H. sapiens	27141	H. sapiens	CIDEB	cell death inducing DFFA like effector b	GO:0097202 activation of cysteine-type endopeptidase activity;GO:0090200 positive regulation of release of cytochrome c from mitochondria;GO:0090199 regulation of release of cytochrome c from mitochondria							0.0	0.0	0.0	0.0	0.0	0.0	0.0	0.0	0.0	0.0	0.0	0.0	0.0	0.0	0.0	0.0	0.0	0.0	0.0	0.0
CIITA	4261	symbol	H. sapiens	4261	H. sapiens	CIITA	class II major histocompatibility complex transactivator	GO:0045345 positive regulation of MHC class I biosynthetic process;GO:0045348 positive regulation of MHC class II biosynthetic process;GO:0032966 negative regulation of collagen biosynthetic process		Enzymes/ENZYME proteins/Transferases	Nucleoplasm(Approved)			(M5913)HALLMARK INTERFERON GAMMA RESPONSE	0.0	1.0	0.0	0.0	0.0	0.0	0.0	0.0	0.0	0.0	0.0	0.0	1.0	0.0	0.0	0.0	0.0	0.0	0.0	0.0
CISH	1154	symbol	H. sapiens	1154	H. sapiens	CISH	cytokine inducible SH2 containing protein	GO:0038111 interleukin-7-mediated signaling pathway;GO:0098761 cellular response to interleukin-7;GO:0043551 regulation of phosphatidylinositol 3-kinase activity			Cytokinetic bridge;Microtubules(Approved)		(M5248)ST JAK STAT PATHWAY; (M4170)ST INTERFERON GAMMA PATHWAY; (M9174)ST STAT3 PATHWAY	(M5947)HALLMARK IL2 STAT5 SIGNALING; (M5906)HALLMARK ESTROGEN RESPONSE EARLY; (M5907)HALLMARK ESTROGEN RESPONSE LATE	0.0	1.0	0.0	0.0	0.0	0.0	0.0	0.0	0.0	0.0	0.0	0.0	0.0	0.0	0.0	0.0	0.0	0.0	0.0	0.0
CLCA2	9635	symbol	H. sapiens	9635	H. sapiens	CLCA2	chloride channel accessory 2	GO:1902476 chloride transmembrane transport;GO:0006821 chloride transport;GO:0098661 inorganic anion transmembrane transport			Cell Junctions;Plasma membrane(Supported)Nucleus(Approved)		(M256)PID TAP63 PATHWAY; (M19)PID P73PATHWAY	(M5939)HALLMARK P53 PATHWAY	0.0	0.0	0.0	0.0	0.0	0.0	0.0	0.0	0.0	0.0	0.0	0.0	0.0	0.0	0.0	0.0	0.0	0.0	0.0	0.0
CLCF1	23529	symbol	H. sapiens	23529	H. sapiens	CLCF1	cardiotrophin like cytokine factor 1	GO:0048295 positive regulation of isotype switching to IgE isotypes;GO:0048293 regulation of isotype switching to IgE isotypes;GO:0048289 isotype switching to IgE isotypes			Nuclear bodies;Vesicles(Approved)		(M5883)NABA SECRETED FACTORS; (M5885)NABA MATRISOME ASSOCIATED; (M5889)NABA MATRISOME	(M5890)HALLMARK TNFA SIGNALING VIA NFKB	1.0	1.0	1.0	0.0	0.0	1.0	0.0	0.0	0.0	1.0	0.0	0.0	0.0	0.0	0.0	1.0	0.0	0.0	0.0	0.0
CLDN1	9076	symbol	H. sapiens	9076	H. sapiens	CLDN1	claudin 1	GO:1903348 positive regulation of bicellular tight junction assembly;GO:1903545 cellular response to butyrate;GO:1903544 response to butyrate		Transporters/Transporter channels and pores			(M72)PID NECTIN PATHWAY		0.0	0.0	0.0	0.0	1.0	0.0	0.0	1.0	0.0	0.0	0.0	0.0	1.0	0.0	0.0	0.0	0.0	0.0	0.0	1.0
CLDN23	137075	symbol	H. sapiens	137075	H. sapiens	CLDN23	claudin 23	GO:0016338 calcium-independent cell-cell adhesion via plasma membrane cell-adhesion molecules;GO:0098742 cell-cell adhesion via plasma-membrane adhesion molecules;GO:0098609 cell-cell adhesion		Transporters/Transporter channels and pores	Nucleus;Plasma membrane(Uncertain)				0.0	0.0	0.0	0.0	0.0	0.0	0.0	0.0	0.0	0.0	0.0	0.0	1.0	0.0	0.0	0.0	0.0	0.0	0.0	0.0
CLDN4	1364	symbol	H. sapiens	1364	H. sapiens	CLDN4	claudin 4	GO:0061436 establishment of skin barrier;GO:1905050 positive regulation of metallopeptidase activity;GO:0016338 calcium-independent cell-cell adhesion via plasma membrane cell-adhesion molecules		Transporters/Transporter channels and pores	Plasma membrane(Supported)			(M5915)HALLMARK APICAL JUNCTION	0.0	0.0	0.0	0.0	1.0	0.0	0.0	0.0	0.0	0.0	0.0	0.0	1.0	0.0	0.0	0.0	0.0	0.0	0.0	1.0
CLDN7	1366	symbol	H. sapiens	1366	H. sapiens	CLDN7	claudin 7	GO:0016338 calcium-independent cell-cell adhesion via plasma membrane cell-adhesion molecules;GO:0031333 negative regulation of protein complex assembly;GO:0045471 response to ethanol		Transporters/Transporter channels and pores	Cell Junctions(Supported)Vesicles(Approved)			(M5906)HALLMARK ESTROGEN RESPONSE EARLY; (M5915)HALLMARK APICAL JUNCTION	0.0	0.0	1.0	0.0	1.0	0.0	0.0	0.0	0.0	0.0	1.0	0.0	1.0	0.0	0.0	0.0	0.0	0.0	0.0	0.0
CLEC10A	10462	symbol	H. sapiens	10462	H. sapiens	CLEC10A	C-type lectin domain containing 10A	GO:0002223 stimulatory C-type lectin receptor signaling pathway;GO:0002220 innate immune response activating cell surface receptor signaling pathway;GO:0002758 innate immune response-activating signal transduction		CD markers			(M5880)NABA ECM AFFILIATED; (M5885)NABA MATRISOME ASSOCIATED; (M5889)NABA MATRISOME		0.0	0.0	0.0	0.0	0.0	1.0	1.0	0.0	1.0	0.0	0.0	0.0	0.0	0.0	0.0	1.0	0.0	0.0	0.0	0.0
CLEC12A	160364	symbol	H. sapiens	160364	H. sapiens	CLEC12A	C-type lectin domain family 12 member A	GO:0043312 neutrophil degranulation;GO:0002283 neutrophil activation involved in immune response;GO:0042119 neutrophil activation					(M5880)NABA ECM AFFILIATED; (M5885)NABA MATRISOME ASSOCIATED; (M5889)NABA MATRISOME		1.0	0.0	0.0	0.0	0.0	0.0	0.0	0.0	0.0	0.0	0.0	0.0	0.0	0.0	0.0	1.0	0.0	0.0	0.0	0.0
CLEC2B	9976	symbol	H. sapiens	9976	H. sapiens	CLEC2B	C-type lectin domain family 2 member B	GO:0050776 regulation of immune response;GO:0002682 regulation of immune system process;GO:0006955 immune response					(M5880)NABA ECM AFFILIATED; (M5885)NABA MATRISOME ASSOCIATED; (M5889)NABA MATRISOME		0.0	0.0	0.0	0.0	0.0	0.0	0.0	0.0	0.0	0.0	0.0	0.0	0.0	0.0	1.0	1.0	0.0	0.0	0.0	0.0
CLEC4A	50856	symbol	H. sapiens	50856	H. sapiens	CLEC4A	C-type lectin domain family 4 member A	GO:0002470 plasmacytoid dendritic cell antigen processing and presentation;GO:0002223 stimulatory C-type lectin receptor signaling pathway;GO:0002220 innate immune response activating cell surface receptor signaling pathway					(M5880)NABA ECM AFFILIATED; (M5885)NABA MATRISOME ASSOCIATED; (M5889)NABA MATRISOME	(M5953)HALLMARK KRAS SIGNALING UP	0.0	0.0	1.0	1.0	0.0	1.0	1.0	0.0	1.0	1.0	0.0	0.0	1.0	0.0	0.0	1.0	0.0	0.0	0.0	0.0
CLEC4D	338339	symbol	H. sapiens	338339	H. sapiens	CLEC4D	C-type lectin domain family 4 member D	GO:0030887 positive regulation of myeloid dendritic cell activation;GO:0002223 stimulatory C-type lectin receptor signaling pathway;GO:0030885 regulation of myeloid dendritic cell activation					(M5880)NABA ECM AFFILIATED; (M5885)NABA MATRISOME ASSOCIATED; (M5889)NABA MATRISOME		1.0	0.0	1.0	0.0	0.0	1.0	1.0	1.0	1.0	1.0	0.0	0.0	0.0	0.0	0.0	1.0	0.0	0.0	0.0	0.0
CLEC5A	23601	symbol	H. sapiens	23601	H. sapiens	CLEC5A	C-type lectin domain containing 5A	GO:0033033 negative regulation of myeloid cell apoptotic process;GO:0046718 viral entry into host cell;GO:0030260 entry into host cell			Plasma membrane(Supported)Cytosol(Approved)		(M5880)NABA ECM AFFILIATED; (M5885)NABA MATRISOME ASSOCIATED; (M5889)NABA MATRISOME	(M5932)HALLMARK INFLAMMATORY RESPONSE	1.0	0.0	0.0	1.0	0.0	0.0	0.0	0.0	0.0	0.0	0.0	0.0	0.0	0.0	0.0	1.0	0.0	0.0	1.0	0.0
CLEC7A	64581	symbol	H. sapiens	64581	H. sapiens	CLEC7A	C-type lectin domain containing 7A	GO:0016046 detection of fungus;GO:0045082 positive regulation of interleukin-10 biosynthetic process;GO:0032491 detection of molecule of fungal origin			Vesicles(Supported)Nucleoplasm(Uncertain)		(M5880)NABA ECM AFFILIATED; (M5885)NABA MATRISOME ASSOCIATED; (M5889)NABA MATRISOME		0.0	0.0	1.0	1.0	1.0	0.0	0.0	1.0	1.0	0.0	0.0	0.0	1.0	1.0	0.0	1.0	0.0	0.0	0.0	1.0
CMKLR1	1240	symbol	H. sapiens	1240	H. sapiens	CMKLR1	chemerin chemokine-like receptor 1	GO:0010759 positive regulation of macrophage chemotaxis;GO:1905523 positive regulation of macrophage migration;GO:0010758 regulation of macrophage chemotaxis		G-protein coupled receptors/GPCRs excl olfactory receptors;Transporters				(M5932)HALLMARK INFLAMMATORY RESPONSE; (M5953)HALLMARK KRAS SIGNALING UP; (M5913)HALLMARK INTERFERON GAMMA RESPONSE	0.0	1.0	0.0	1.0	1.0	0.0	1.0	0.0	0.0	0.0	0.0	0.0	0.0	1.0	0.0	0.0	0.0	0.0	0.0	0.0
CMTM7	112616	symbol	H. sapiens	112616	H. sapiens	CMTM7	CKLF like MARVEL transmembrane domain containing 7	GO:0002337 B-1a B cell differentiation;GO:0001923 B-1 B cell differentiation;GO:0002335 mature B cell differentiation		Transporters/Transporter channels and pores	Plasma membrane(Approved)				0.0	0.0	1.0	0.0	1.0	0.0	0.0	0.0	0.0	0.0	0.0	0.0	0.0	0.0	0.0	0.0	0.0	0.0	0.0	0.0
CMYA5	202333	symbol	H. sapiens	202333	H. sapiens	CMYA5	cardiomyopathy associated 5								0.0	0.0	0.0	0.0	0.0	0.0	0.0	0.0	0.0	0.0	0.0	0.0	0.0	0.0	0.0	0.0	0.0	0.0	0.0	0.0
CNTNAP3	79937	symbol	H. sapiens	79937	H. sapiens	CNTNAP3	contactin associated protein family member 3	GO:0008037 cell recognition;GO:0007155 cell adhesion;GO:0022610 biological adhesion							0.0	0.0	0.0	0.0	0.0	0.0	0.0	0.0	0.0	0.0	0.0	0.0	0.0	0.0	0.0	0.0	0.0	0.0	0.0	0.0
COL12A1	1303	symbol	H. sapiens	1303	H. sapiens	COL12A1	collagen type XII alpha 1 chain	GO:0003429 growth plate cartilage chondrocyte morphogenesis;GO:0003414 chondrocyte morphogenesis involved in endochondral bone morphogenesis;GO:0003422 growth plate cartilage morphogenesis			Nucleus(Approved)		(M3005)NABA COLLAGENS; (M198)PID SYNDECAN 1 PATHWAY; (M160)PID AVB3 INTEGRIN PATHWAY	(M5930)HALLMARK EPITHELIAL MESENCHYMAL TRANSITION	0.0	0.0	0.0	0.0	0.0	0.0	0.0	0.0	0.0	0.0	0.0	1.0	0.0	0.0	0.0	0.0	0.0	0.0	0.0	0.0
COL13A1	1305	symbol	H. sapiens	1305	H. sapiens	COL13A1	collagen type XIII alpha 1 chain	GO:0001958 endochondral ossification;GO:0060350 endochondral bone morphogenesis;GO:0036075 replacement ossification					(M3005)NABA COLLAGENS; (M198)PID SYNDECAN 1 PATHWAY; (M160)PID AVB3 INTEGRIN PATHWAY		0.0	0.0	0.0	0.0	0.0	0.0	0.0	0.0	0.0	0.0	0.0	1.0	0.0	0.0	0.0	0.0	0.0	0.0	0.0	0.0
COL15A1	1306	symbol	H. sapiens	1306	H. sapiens	COL15A1	collagen type XV alpha 1 chain	GO:0030574 collagen catabolic process;GO:0001525 angiogenesis;GO:0032963 collagen metabolic process			Endoplasmic reticulum(Approved)		(M5887)NABA BASEMENT MEMBRANES; (M3005)NABA COLLAGENS; (M198)PID SYNDECAN 1 PATHWAY	(M5905)HALLMARK ADIPOGENESIS; (M5909)HALLMARK MYOGENESIS	0.0	0.0	0.0	0.0	0.0	0.0	0.0	0.0	0.0	0.0	0.0	1.0	0.0	0.0	0.0	0.0	0.0	0.0	0.0	0.0
COL16A1	1307	symbol	H. sapiens	1307	H. sapiens	COL16A1	collagen type XVI alpha 1 chain	GO:0051894 positive regulation of focal adhesion assembly;GO:0051893 regulation of focal adhesion assembly;GO:1903393 positive regulation of adherens junction organization			Cytosol;Golgi apparatus;Plasma membrane(Approved)		(M3005)NABA COLLAGENS; (M198)PID SYNDECAN 1 PATHWAY; (M160)PID AVB3 INTEGRIN PATHWAY	(M5915)HALLMARK APICAL JUNCTION; (M5930)HALLMARK EPITHELIAL MESENCHYMAL TRANSITION	0.0	0.0	1.0	0.0	0.0	0.0	0.0	0.0	0.0	0.0	0.0	1.0	0.0	0.0	0.0	0.0	0.0	0.0	0.0	0.0
COL1A1	1277	symbol	H. sapiens	1277	H. sapiens	COL1A1	collagen type I alpha 1 chain	GO:0071306 cellular response to vitamin E;GO:1902618 cellular response to fluoride;GO:0033197 response to vitamin E			Cytosol;Vesicles(Approved)	Collagenase clostridium histolyticum (Platelet-derived growth factor binding);Halofuginone (Platelet-derived growth factor binding)	(M274)PID LYMPH ANGIOGENESIS PATHWAY; (M53)PID INTEGRIN3 PATHWAY; (M3005)NABA COLLAGENS	(M5942)HALLMARK UV RESPONSE DN; (M5909)HALLMARK MYOGENESIS; (M5930)HALLMARK EPITHELIAL MESENCHYMAL TRANSITION	0.0	0.0	1.0	0.0	1.0	0.0	0.0	1.0	0.0	0.0	1.0	1.0	0.0	0.0	1.0	0.0	0.0	0.0	0.0	1.0
COL1A2	1278	symbol	H. sapiens	1278	H. sapiens	COL1A2	collagen type I alpha 2 chain	GO:0070208 protein heterotrimerization;GO:0043589 skin morphogenesis;GO:0070206 protein trimerization			Endoplasmic reticulum(Supported)	Collagenase clostridium histolyticum (Protein binding, bridging)	(M274)PID LYMPH ANGIOGENESIS PATHWAY; (M65)PID FRA PATHWAY; (M53)PID INTEGRIN3 PATHWAY	(M5942)HALLMARK UV RESPONSE DN; (M5930)HALLMARK EPITHELIAL MESENCHYMAL TRANSITION	0.0	1.0	0.0	0.0	1.0	0.0	0.0	0.0	0.0	0.0	0.0	1.0	0.0	0.0	1.0	0.0	0.0	0.0	0.0	1.0
COL24A1	255631	symbol	H. sapiens	255631	H. sapiens	COL24A1	collagen type XXIV alpha 1 chain	GO:0030198 extracellular matrix organization;GO:0043062 extracellular structure organization;GO:0016043 cellular component organization					(M3005)NABA COLLAGENS; (M166)PID ATF2 PATHWAY; (M5884)NABA CORE MATRISOME		0.0	0.0	0.0	0.0	0.0	0.0	0.0	0.0	0.0	0.0	0.0	1.0	0.0	0.0	0.0	0.0	0.0	0.0	0.0	0.0
COL27A1	85301	symbol	H. sapiens	85301	H. sapiens	COL27A1	collagen type XXVII alpha 1 chain	GO:0003431 growth plate cartilage chondrocyte development;GO:0003433 chondrocyte development involved in endochondral bone morphogenesis;GO:0003418 growth plate cartilage chondrocyte differentiation					(M3005)NABA COLLAGENS; (M5884)NABA CORE MATRISOME; (M5889)NABA MATRISOME		0.0	0.0	0.0	0.0	0.0	0.0	0.0	0.0	0.0	0.0	0.0	1.0	0.0	0.0	0.0	0.0	0.0	0.0	0.0	0.0
COL3A1	1281	symbol	H. sapiens	1281	H. sapiens	COL3A1	collagen type III alpha 1 chain	GO:0060414 aorta smooth muscle tissue morphogenesis;GO:2001223 negative regulation of neuron migration;GO:0035909 aorta morphogenesis				Collagenase clostridium histolyticum (Platelet-derived growth factor binding)	(M3005)NABA COLLAGENS; (M198)PID SYNDECAN 1 PATHWAY; (M8)PID ENDOTHELIN PATHWAY	(M5944)HALLMARK ANGIOGENESIS; (M5942)HALLMARK UV RESPONSE DN; (M5909)HALLMARK MYOGENESIS	0.0	0.0	0.0	0.0	0.0	0.0	0.0	0.0	0.0	0.0	1.0	1.0	0.0	0.0	1.0	0.0	0.0	0.0	1.0	1.0
COL5A1	1289	symbol	H. sapiens	1289	H. sapiens	COL5A1	collagen type V alpha 1 chain	GO:1903225 negative regulation of endodermal cell differentiation;GO:0035313 wound healing, spreading of epidermal cells;GO:1903224 regulation of endodermal cell differentiation			Vesicles(Approved)		(M3005)NABA COLLAGENS; (M198)PID SYNDECAN 1 PATHWAY; (M236)PID DELTA NP63 PATHWAY	(M5937)HALLMARK GLYCOLYSIS; (M5891)HALLMARK HYPOXIA; (M5930)HALLMARK EPITHELIAL MESENCHYMAL TRANSITION	0.0	0.0	0.0	0.0	0.0	0.0	0.0	0.0	0.0	0.0	0.0	1.0	0.0	0.0	0.0	0.0	0.0	0.0	1.0	1.0
COL5A2	1290	symbol	H. sapiens	1290	H. sapiens	COL5A2	collagen type V alpha 2 chain	GO:1903225 negative regulation of endodermal cell differentiation;GO:1903224 regulation of endodermal cell differentiation;GO:2000542 negative regulation of gastrulation					(M3005)NABA COLLAGENS; (M198)PID SYNDECAN 1 PATHWAY; (M18)PID INTEGRIN1 PATHWAY	(M5944)HALLMARK ANGIOGENESIS; (M5942)HALLMARK UV RESPONSE DN; (M5930)HALLMARK EPITHELIAL MESENCHYMAL TRANSITION	0.0	0.0	0.0	0.0	0.0	0.0	0.0	0.0	0.0	0.0	0.0	1.0	0.0	0.0	0.0	0.0	0.0	0.0	1.0	0.0
COL5A3	50509	symbol	H. sapiens	50509	H. sapiens	COL5A3	collagen type V alpha 3 chain	GO:0030199 collagen fibril organization;GO:0007160 cell-matrix adhesion;GO:0043588 skin development					(M3005)NABA COLLAGENS; (M5884)NABA CORE MATRISOME; (M5889)NABA MATRISOME	(M5930)HALLMARK EPITHELIAL MESENCHYMAL TRANSITION	0.0	0.0	0.0	0.0	0.0	0.0	0.0	0.0	0.0	0.0	0.0	1.0	0.0	0.0	0.0	0.0	0.0	0.0	0.0	0.0
COL6A1	1291	symbol	H. sapiens	1291	H. sapiens	COL6A1	collagen type VI alpha 1 chain	GO:0003429 growth plate cartilage chondrocyte morphogenesis;GO:0003414 chondrocyte morphogenesis involved in endochondral bone morphogenesis;GO:0003422 growth plate cartilage morphogenesis			Cytosol(Approved)		(M5887)NABA BASEMENT MEMBRANES; (M3005)NABA COLLAGENS; (M198)PID SYNDECAN 1 PATHWAY	(M5947)HALLMARK IL2 STAT5 SIGNALING	0.0	0.0	0.0	0.0	0.0	0.0	0.0	0.0	0.0	0.0	0.0	1.0	0.0	0.0	0.0	0.0	0.0	0.0	0.0	0.0
COL6A2	1292	symbol	H. sapiens	1292	H. sapiens	COL6A2	collagen type VI alpha 2 chain	GO:0003429 growth plate cartilage chondrocyte morphogenesis;GO:0003414 chondrocyte morphogenesis involved in endochondral bone morphogenesis;GO:0003422 growth plate cartilage morphogenesis			Cytosol;Plasma membrane(Approved)		(M5887)NABA BASEMENT MEMBRANES; (M3005)NABA COLLAGENS; (M198)PID SYNDECAN 1 PATHWAY	(M5909)HALLMARK MYOGENESIS; (M5930)HALLMARK EPITHELIAL MESENCHYMAL TRANSITION	0.0	0.0	0.0	0.0	0.0	0.0	0.0	0.0	0.0	0.0	0.0	1.0	0.0	0.0	0.0	0.0	0.0	0.0	0.0	0.0
COL6A3	1293	symbol	H. sapiens	1293	H. sapiens	COL6A3	collagen type VI alpha 3 chain	GO:0003429 growth plate cartilage chondrocyte morphogenesis;GO:0003414 chondrocyte morphogenesis involved in endochondral bone morphogenesis;GO:0003422 growth plate cartilage morphogenesis					(M5887)NABA BASEMENT MEMBRANES; (M3005)NABA COLLAGENS; (M198)PID SYNDECAN 1 PATHWAY	(M5909)HALLMARK MYOGENESIS; (M5930)HALLMARK EPITHELIAL MESENCHYMAL TRANSITION	0.0	0.0	0.0	0.0	0.0	0.0	0.0	0.0	0.0	0.0	0.0	1.0	0.0	0.0	0.0	0.0	0.0	0.0	0.0	0.0
COL7A1	1294	symbol	H. sapiens	1294	H. sapiens	COL7A1	collagen type VII alpha 1 chain	GO:0003429 growth plate cartilage chondrocyte morphogenesis;GO:0003414 chondrocyte morphogenesis involved in endochondral bone morphogenesis;GO:0003422 growth plate cartilage morphogenesis					(M3005)NABA COLLAGENS; (M198)PID SYNDECAN 1 PATHWAY; (M18)PID INTEGRIN1 PATHWAY	(M5930)HALLMARK EPITHELIAL MESENCHYMAL TRANSITION	0.0	0.0	0.0	0.0	0.0	0.0	0.0	0.0	0.0	0.0	0.0	1.0	0.0	0.0	0.0	0.0	0.0	0.0	0.0	0.0
COL8A1	1295	symbol	H. sapiens	1295	H. sapiens	COL8A1	collagen type VIII alpha 1 chain	GO:0035987 endodermal cell differentiation;GO:0001706 endoderm formation;GO:0048593 camera-type eye morphogenesis			Vesicles(Supported)		(M3005)NABA COLLAGENS; (M198)PID SYNDECAN 1 PATHWAY; (M160)PID AVB3 INTEGRIN PATHWAY		0.0	0.0	1.0	0.0	0.0	0.0	0.0	0.0	0.0	0.0	0.0	1.0	0.0	0.0	0.0	0.0	0.0	0.0	0.0	0.0
COL8A2	1296	symbol	H. sapiens	1296	H. sapiens	COL8A2	collagen type VIII alpha 2 chain	GO:0048593 camera-type eye morphogenesis;GO:0001525 angiogenesis;GO:0048592 eye morphogenesis			Golgi apparatus(Uncertain)		(M3005)NABA COLLAGENS; (M198)PID SYNDECAN 1 PATHWAY; (M160)PID AVB3 INTEGRIN PATHWAY	(M5930)HALLMARK EPITHELIAL MESENCHYMAL TRANSITION	0.0	0.0	0.0	0.0	0.0	0.0	0.0	0.0	0.0	0.0	0.0	1.0	0.0	0.0	0.0	0.0	0.0	0.0	0.0	0.0
COLGALT1	79709	symbol	H. sapiens	79709	H. sapiens	COLGALT1	collagen beta(1-O)galactosyltransferase 1	GO:1904028 positive regulation of collagen fibril organization;GO:1904026 regulation of collagen fibril organization;GO:1903055 positive regulation of extracellular matrix organization		Enzymes/ENZYME proteins/Transferases	Vesicles(Approved)			(M5930)HALLMARK EPITHELIAL MESENCHYMAL TRANSITION	0.0	0.0	0.0	0.0	0.0	0.0	0.0	0.0	0.0	0.0	0.0	1.0	0.0	0.0	0.0	0.0	0.0	0.0	0.0	0.0
CP	1356	symbol	H. sapiens	1356	H. sapiens	CP	ceruloplasmin	GO:0006879 cellular iron ion homeostasis;GO:0006825 copper ion transport;GO:0055072 iron ion homeostasis		Enzymes/ENZYME proteins/Oxidoreductases		Drotrecogin alfa (Ferroxidase activity)	(M255)PID HIF1 TFPATHWAY	(M5921)HALLMARK COMPLEMENT; (M5891)HALLMARK HYPOXIA	0.0	0.0	0.0	0.0	0.0	0.0	0.0	0.0	0.0	0.0	0.0	0.0	0.0	0.0	0.0	0.0	0.0	0.0	0.0	0.0
CPA4	51200	symbol	H. sapiens	51200	H. sapiens	CPA4	carboxypeptidase A4	GO:0016573 histone acetylation;GO:0018393 internal peptidyl-lysine acetylation;GO:0006475 internal protein amino acid acetylation		Enzymes/Peptidases/Metallopeptidases	Centrosome;Cytosol;Nucleoplasm(Approved)				0.0	0.0	0.0	0.0	0.0	0.0	0.0	0.0	0.0	0.0	0.0	0.0	0.0	0.0	0.0	0.0	0.0	0.0	0.0	0.0
CPD	1362	symbol	H. sapiens	1362	H. sapiens	CPD	carboxypeptidase D	GO:0016485 protein processing;GO:0051604 protein maturation;GO:0006518 peptide metabolic process		Enzymes/{ENZYME proteins/Hydrolases,Peptidases/Metallopeptidases}	Nuclear membrane;Nuclear speckles;Nucleoplasm(Approved)	Guanidinoethylmercaptosuccinic acid (Zinc ion binding)			0.0	0.0	0.0	0.0	0.0	0.0	0.0	0.0	0.0	0.0	0.0	0.0	0.0	0.0	0.0	0.0	0.0	0.0	0.0	0.0
CPQ	10404	symbol	H. sapiens	10404	H. sapiens	CPQ	carboxypeptidase Q	GO:0006590 thyroid hormone generation;GO:0042403 thyroid hormone metabolic process;GO:0043171 peptide catabolic process		Enzymes/Peptidases/Metallopeptidases	Golgi apparatus;Vesicles(Supported)	L-Glutamic Acid (Protein homodimerization activity)		(M5946)HALLMARK COAGULATION; (M5921)HALLMARK COMPLEMENT	0.0	0.0	0.0	0.0	0.0	0.0	0.0	0.0	0.0	0.0	0.0	0.0	0.0	0.0	0.0	0.0	0.0	0.0	0.0	1.0
CPT1B	1375	symbol	H. sapiens	1375	H. sapiens	CPT1B	carnitine palmitoyltransferase 1B	GO:0006853 carnitine shuttle;GO:1902001 fatty acid transmembrane transport;GO:0015909 long-chain fatty acid transport		Enzymes/ENZYME proteins/Transferases			(M106)PID HNF3B PATHWAY		0.0	0.0	0.0	0.0	0.0	0.0	0.0	0.0	0.0	0.0	0.0	0.0	0.0	0.0	0.0	0.0	0.0	0.0	0.0	0.0
CR1	1378	symbol	H. sapiens	1378	H. sapiens	CR1	complement C3b/C4b receptor 1 (Knops blood group)	GO:0045959 negative regulation of complement activation, classical pathway;GO:0030450 regulation of complement activation, classical pathway;GO:0045957 negative regulation of complement activation, alternative pathway		Blood group antigen proteins;CD markers				(M5921)HALLMARK COMPLEMENT	1.0	0.0	1.0	0.0	0.0	1.0	1.0	0.0	1.0	0.0	1.0	0.0	1.0	1.0	0.0	0.0	0.0	0.0	0.0	0.0
CRACR2A	84766	symbol	H. sapiens	84766	H. sapiens	CRACR2A	calcium release activated channel regulator 2A	GO:0032237 activation of store-operated calcium channel activity;GO:1901341 positive regulation of store-operated calcium channel activity;GO:1901339 regulation of store-operated calcium channel activity							1.0	0.0	0.0	0.0	0.0	1.0	0.0	0.0	0.0	0.0	0.0	0.0	0.0	0.0	0.0	0.0	0.0	0.0	0.0	0.0
CRACR2B	283229	symbol	H. sapiens	283229	H. sapiens	CRACR2B	calcium release activated channel regulator 2B	GO:2001256 regulation of store-operated calcium entry;GO:0002115 store-operated calcium entry;GO:0051924 regulation of calcium ion transport							0.0	0.0	0.0	0.0	0.0	0.0	0.0	0.0	0.0	0.0	0.0	0.0	0.0	0.0	0.0	0.0	0.0	0.0	0.0	0.0
CREG1	8804	symbol	H. sapiens	8804	H. sapiens	CREG1	cellular repressor of E1A stimulated genes 1	GO:0043312 neutrophil degranulation;GO:0002283 neutrophil activation involved in immune response;GO:0042119 neutrophil activation			Microtubules;Vesicles(Approved)			(M5941)HALLMARK UV RESPONSE UP	1.0	0.0	0.0	0.0	0.0	0.0	0.0	0.0	0.0	0.0	0.0	0.0	0.0	0.0	0.0	0.0	0.0	0.0	0.0	0.0
CRIPAK						None	None	None	None	None	None	None	None	None	nan	nan	nan	nan	nan	nan	nan	nan	nan	nan	nan	nan	nan	nan	nan	nan	nan	nan	nan	nan
CRISPLD2	83716	symbol	H. sapiens	83716	H. sapiens	CRISPLD2	cysteine rich secretory protein LCCL domain containing 2	GO:0060325 face morphogenesis;GO:0043312 neutrophil degranulation;GO:0002283 neutrophil activation involved in immune response			Nucleoli;Nucleus(Approved)		(M3008)NABA ECM GLYCOPROTEINS; (M5884)NABA CORE MATRISOME; (M5889)NABA MATRISOME		1.0	0.0	0.0	0.0	0.0	0.0	0.0	0.0	0.0	0.0	0.0	1.0	0.0	0.0	0.0	0.0	0.0	0.0	0.0	0.0
CRTAM	56253	symbol	H. sapiens	56253	H. sapiens	CRTAM	cytotoxic and regulatory T cell molecule	GO:0002860 positive regulation of natural killer cell mediated cytotoxicity directed against tumor cell target;GO:0002857 positive regulation of natural killer cell mediated immune response to tumor cell;GO:0002858 regulation of natural killer cell mediated cytotoxicity directed against tumor cell target		CD markers				(M5950)HALLMARK ALLOGRAFT REJECTION	0.0	0.0	1.0	1.0	0.0	1.0	0.0	0.0	1.0	0.0	0.0	0.0	0.0	0.0	1.0	0.0	0.0	0.0	0.0	0.0
CSF1	1435	symbol	H. sapiens	1435	H. sapiens	CSF1	colony stimulating factor 1	GO:1902228 positive regulation of macrophage colony-stimulating factor signaling pathway;GO:1904141 positive regulation of microglial cell migration;GO:1903974 positive regulation of cellular response to macrophage colony-stimulating factor stimulus		RAS pathway related proteins			(M11736)SA MMP CYTOKINE CONNECTION; (M91)PID TCPTP PATHWAY; (M50)PID PTP1B PATHWAY	(M5897)HALLMARK IL6 JAK STAT3 SIGNALING; (M5911)HALLMARK INTERFERON ALPHA RESPONSE; (M5947)HALLMARK IL2 STAT5 SIGNALING	1.0	1.0	1.0	0.0	1.0	0.0	0.0	0.0	0.0	0.0	0.0	0.0	1.0	1.0	0.0	1.0	1.0	1.0	1.0	0.0
CSF1R	1436	symbol	H. sapiens	1436	H. sapiens	CSF1R	colony stimulating factor 1 receptor	GO:0090197 positive regulation of chemokine secretion;GO:0038145 macrophage colony-stimulating factor signaling pathway;GO:0044794 positive regulation by host of viral process	Tyr protein kinase family	CD markers;Enzymes/{ENZYME proteins/Transferases,Kinases/Tyr protein kinases};RAS pathway related proteins	Plasma membrane(Supported)Vesicles(Approved)	Imatinib (Protein homodimerization activity);Sunitinib (Protein homodimerization activity);ABT-869 (Protein homodimerization activity);5-CYANO-FURAN-2-CARBOXYLIC ACID [5-HYDROXYMETHYL-2-(4-METHYL-PIPERIDIN-1-YL)-PHENYL]-AMIDE (Protein homodimerization activity);6-CHLORO-3-(3-METHYLISOXAZOL-5-YL)-4-PHENYLQUINOLIN-2(1H)-ONE (Protein homodimerization activity)	(M91)PID TCPTP PATHWAY; (M50)PID PTP1B PATHWAY; (M160)PID AVB3 INTEGRIN PATHWAY		0.0	1.0	1.0	1.0	1.0	0.0	0.0	0.0	0.0	0.0	1.0	0.0	1.0	0.0	0.0	0.0	1.0	0.0	1.0	0.0
CSF2	1437	symbol	H. sapiens	1437	H. sapiens	CSF2	colony stimulating factor 2	GO:0032747 positive regulation of interleukin-23 production;GO:0045187 regulation of circadian sleep/wake cycle, sleep;GO:0010744 positive regulation of macrophage derived foam cell differentiation			Vesicles(Enhanced)	KB002 (Granulocyte macrophage colony-stimulating factor receptor binding)	(M118)PID INTEGRIN A9B1 PATHWAY; (M235)PID TCR CALCIUM PATHWAY; (M240)PID SYNDECAN 2 PATHWAY	(M5897)HALLMARK IL6 JAK STAT3 SIGNALING; (M5947)HALLMARK IL2 STAT5 SIGNALING; (M5953)HALLMARK KRAS SIGNALING UP	1.0	1.0	1.0	1.0	0.0	0.0	0.0	1.0	0.0	0.0	0.0	0.0	1.0	0.0	0.0	1.0	0.0	1.0	1.0	0.0
CSF2RB	1439	symbol	H. sapiens	1439	H. sapiens	CSF2RB	colony stimulating factor 2 receptor subunit beta	GO:0038043 interleukin-5-mediated signaling pathway;GO:0038156 interleukin-3-mediated signaling pathway;GO:0036016 cellular response to interleukin-3		CD markers	Golgi apparatus(Approved)	Sargramostim (Receptor activity);NPI 32101 (Receptor activity)	(M135)PID IL5 PATHWAY; (M182)PID IL3 PATHWAY; (M22)PID GMCSF PATHWAY	(M5897)HALLMARK IL6 JAK STAT3 SIGNALING; (M5913)HALLMARK INTERFERON GAMMA RESPONSE	0.0	1.0	0.0	0.0	0.0	0.0	0.0	1.0	0.0	0.0	0.0	0.0	0.0	0.0	0.0	0.0	0.0	0.0	0.0	0.0
CSF3	1440	symbol	H. sapiens	1440	H. sapiens	CSF3	colony stimulating factor 3	GO:2000251 positive regulation of actin cytoskeleton reorganization;GO:0030851 granulocyte differentiation;GO:0014068 positive regulation of phosphatidylinositol 3-kinase signaling					(M5883)NABA SECRETED FACTORS; (M5885)NABA MATRISOME ASSOCIATED; (M5889)NABA MATRISOME	(M5932)HALLMARK INFLAMMATORY RESPONSE	0.0	1.0	1.0	0.0	0.0	0.0	0.0	1.0	0.0	0.0	0.0	0.0	1.0	0.0	0.0	1.0	0.0	1.0	1.0	0.0
CSF3R	1441	symbol	H. sapiens	1441	H. sapiens	CSF3R	colony stimulating factor 3 receptor	GO:0097186 amelogenesis;GO:0030593 neutrophil chemotaxis;GO:0071621 granulocyte chemotaxis		CD markers		Pegfilgrastim (Receptor activity);Filgrastim (Receptor activity);FavId (Receptor activity)		(M5897)HALLMARK IL6 JAK STAT3 SIGNALING; (M5932)HALLMARK INFLAMMATORY RESPONSE	0.0	1.0	1.0	0.0	1.0	0.0	0.0	0.0	0.0	0.0	0.0	0.0	1.0	0.0	0.0	0.0	0.0	0.0	1.0	0.0
CST6	1474	symbol	H. sapiens	1474	H. sapiens	CST6	cystatin E/M	GO:0010951 negative regulation of endopeptidase activity;GO:0010466 negative regulation of peptidase activity;GO:0045861 negative regulation of proteolysis			Cytosol;Plasma membrane(Approved)		(M3468)NABA ECM REGULATORS; (M5885)NABA MATRISOME ASSOCIATED; (M5889)NABA MATRISOME		0.0	0.0	0.0	0.0	0.0	0.0	0.0	0.0	0.0	0.0	0.0	0.0	0.0	0.0	0.0	1.0	0.0	0.0	0.0	0.0
CST7	8530	symbol	H. sapiens	8530	H. sapiens	CST7	cystatin F	GO:1903979 negative regulation of microglial cell activation;GO:0097340 inhibition of cysteine-type endopeptidase activity;GO:1903978 regulation of microglial cell activation					(M3468)NABA ECM REGULATORS; (M5885)NABA MATRISOME ASSOCIATED; (M5889)NABA MATRISOME	(M5947)HALLMARK IL2 STAT5 SIGNALING	1.0	0.0	1.0	0.0	0.0	0.0	0.0	0.0	0.0	0.0	1.0	0.0	0.0	1.0	0.0	1.0	0.0	0.0	0.0	0.0
CSTA	1475	symbol	H. sapiens	1475	H. sapiens	CSTA	cystatin A	GO:0070268 cornification;GO:0031424 keratinization;GO:0018149 peptide cross-linking			Cytosol;Nucleus(Approved)		(M3468)NABA ECM REGULATORS; (M5885)NABA MATRISOME ASSOCIATED; (M5889)NABA MATRISOME		0.0	0.0	0.0	0.0	0.0	0.0	0.0	0.0	0.0	0.0	0.0	0.0	0.0	0.0	0.0	1.0	0.0	0.0	0.0	0.0
CTF1	1489	symbol	H. sapiens	1489	H. sapiens	CTF1	cardiotrophin 1	GO:0048861 leukemia inhibitory factor signaling pathway;GO:0042531 positive regulation of tyrosine phosphorylation of STAT protein;GO:0042509 regulation of tyrosine phosphorylation of STAT protein					(M5883)NABA SECRETED FACTORS; (M5885)NABA MATRISOME ASSOCIATED; (M5889)NABA MATRISOME	(M5909)HALLMARK MYOGENESIS	0.0	1.0	0.0	0.0	0.0	0.0	0.0	0.0	0.0	0.0	0.0	0.0	0.0	0.0	0.0	1.0	0.0	0.0	0.0	0.0
CTLA4	1493	symbol	H. sapiens	1493	H. sapiens	CTLA4	cytotoxic T-lymphocyte associated protein 4	GO:0045590 negative regulation of regulatory T cell differentiation;GO:0045589 regulation of regulatory T cell differentiation;GO:0030889 negative regulation of B cell proliferation		CD markers		Ipilimumab	(M9526)ST T CELL SIGNAL TRANSDUCTION; (M60)PID NFAT TFPATHWAY	(M5947)HALLMARK IL2 STAT5 SIGNALING	0.0	0.0	1.0	0.0	0.0	1.0	1.0	0.0	0.0	1.0	1.0	0.0	1.0	0.0	1.0	0.0	0.0	0.0	1.0	0.0
CTSA	5476	symbol	H. sapiens	5476	H. sapiens	CTSA	cathepsin A	GO:1904715 negative regulation of chaperone-mediated autophagy;GO:1904714 regulation of chaperone-mediated autophagy;GO:0061684 chaperone-mediated autophagy		Enzymes/{ENZYME proteins/Hydrolases,Peptidases/Serine-type peptidases}	Vesicles(Enhanced)		(M3468)NABA ECM REGULATORS; (M5885)NABA MATRISOME ASSOCIATED; (M5889)NABA MATRISOME		1.0	0.0	0.0	0.0	0.0	0.0	0.0	0.0	0.0	0.0	0.0	0.0	1.0	0.0	1.0	1.0	0.0	0.0	0.0	0.0
CTSB	1508	symbol	H. sapiens	1508	H. sapiens	CTSB	cathepsin B	GO:0046697 decidualization;GO:0046718 viral entry into host cell;GO:0002224 toll-like receptor signaling pathway		Enzymes/{ENZYME proteins/Hydrolases,Peptidases/Cysteine-type peptidases}	Nucleoli;Vesicles(Supported)	2-Aminoethanimidic Acid (Proteoglycan binding);3-Amino-4-Oxybenzyl-2-Butanone (Proteoglycan binding);3-Methylphenylalanine (Proteoglycan binding);N-(3-Propylcarbamoyloxirane-2-Carbonyl)-Isoleucyl-Proline (Proteoglycan binding);2-Pyridinethiol (Proteoglycan binding);Diphenylacetic Acid (Proteoglycan binding);N-[1-Hydroxycarboxyethyl-Carbonyl]Leucylamino-2-Methyl-Butane (Proteoglycan binding);N-{[(…	(M3468)NABA ECM REGULATORS; (M5885)NABA MATRISOME ASSOCIATED; (M5889)NABA MATRISOME	(M5946)HALLMARK COAGULATION; (M5921)HALLMARK COMPLEMENT; (M5945)HALLMARK HEME METABOLISM	1.0	0.0	0.0	0.0	0.0	0.0	1.0	0.0	1.0	0.0	0.0	1.0	1.0	0.0	1.0	1.0	0.0	0.0	0.0	0.0
CTSC	1075	symbol	H. sapiens	1075	H. sapiens	CTSC	cathepsin C	GO:1903980 positive regulation of microglial cell activation;GO:0031642 negative regulation of myelination;GO:0048208 COPII vesicle coating		Enzymes/{ENZYME proteins/Hydrolases,Peptidases/Cysteine-type peptidases}	Vesicles(Supported)		(M3468)NABA ECM REGULATORS; (M5885)NABA MATRISOME ASSOCIATED; (M5889)NABA MATRISOME	(M5910)HALLMARK PROTEIN SECRETION; (M5921)HALLMARK COMPLEMENT; (M5924)HALLMARK MTORC1 SIGNALING	1.0	0.0	1.0	0.0	0.0	1.0	0.0	0.0	1.0	0.0	0.0	0.0	1.0	1.0	1.0	1.0	0.0	0.0	0.0	0.0
CTSD	1509	symbol	H. sapiens	1509	H. sapiens	CTSD	cathepsin D	GO:0019886 antigen processing and presentation of exogenous peptide antigen via MHC class II;GO:0043280 positive regulation of cysteine-type endopeptidase activity involved in apoptotic process;GO:0042159 lipoprotein catabolic process		Enzymes/{ENZYME proteins/Hydrolases,Peptidases/Aspartic-type peptidases}		Insulin Human (Aspartic-type endopeptidase activity);Insulin Pork (Aspartic-type endopeptidase activity);S-Methylcysteine (Aspartic-type endopeptidase activity);1h-Benoximidazole-2-Carboxylic Acid (Aspartic-type endopeptidase activity);N-Aminoethylmorpholine (Aspartic-type endopeptidase activity);5-AMINO-6-CYCLOHEXYL-4-HYDROXY-2-ISOBUTYL-HEXANOIC ACID (Aspartic-type endopeptidase activity);CYCLOH…	(M87)PID LKB1 PATHWAY; (M144)PID CERAMIDE PATHWAY; (M200)PID ERA GENOMIC PATHWAY	(M5921)HALLMARK COMPLEMENT; (M5939)HALLMARK P53 PATHWAY	1.0	0.0	0.0	1.0	0.0	0.0	0.0	0.0	0.0	0.0	0.0	1.0	1.0	0.0	1.0	1.0	0.0	0.0	0.0	0.0
CTSS	1520	symbol	H. sapiens	1520	H. sapiens	CTSS	cathepsin S	GO:0034769 basement membrane disassembly;GO:0002224 toll-like receptor signaling pathway;GO:0097067 cellular response to thyroid hormone stimulus		Enzymes/{ENZYME proteins/Hydrolases,Peptidases/Cysteine-type peptidases}	Vesicles(Approved)	Morpholine-4-Carboxylic Acid [1s-(2-Benzyloxy-1r-Cyano-Ethylcarbamoyl)-3-Methyl-Butyl]Amide (Proteoglycan binding);Morpholine-4-Carboxylic Acid (1-(3-Benzenesulfonyl-1-Phenethylallylcarbamoyl)-3-Methylbutyl)-Amide (Proteoglycan binding);Morpholine-4-Carboxylic Acid [1-(2-Benzylsulfanyl-1-Formyl-Ethylcarbamoyl)-2-Phenyl-Ethyl]-Amide (Proteoglycan binding);N-[1-(AMINOMETHYL)CYCLOPROPYL]-3-(MORPHOLI…	(M3468)NABA ECM REGULATORS; (M5885)NABA MATRISOME ASSOCIATED; (M5889)NABA MATRISOME	(M5921)HALLMARK COMPLEMENT; (M5953)HALLMARK KRAS SIGNALING UP; (M5950)HALLMARK ALLOGRAFT REJECTION	1.0	0.0	0.0	0.0	0.0	1.0	1.0	0.0	1.0	0.0	0.0	1.0	1.0	0.0	1.0	1.0	0.0	0.0	0.0	0.0
CTSW	1521	symbol	H. sapiens	1521	H. sapiens	CTSW	cathepsin W	GO:0002576 platelet degranulation;GO:0045055 regulated exocytosis;GO:0006887 exocytosis		Enzymes/Peptidases/Cysteine-type peptidases			(M3468)NABA ECM REGULATORS; (M5885)NABA MATRISOME ASSOCIATED; (M5889)NABA MATRISOME		1.0	0.0	0.0	0.0	0.0	0.0	0.0	0.0	0.0	0.0	0.0	0.0	0.0	0.0	0.0	1.0	0.0	0.0	0.0	1.0
CTSZ	1522	symbol	H. sapiens	1522	H. sapiens	CTSZ	cathepsin Z	GO:0002003 angiotensin maturation;GO:0002002 regulation of angiotensin levels in blood;GO:0001991 regulation of systemic arterial blood pressure by circulatory renin-angiotensin		Enzymes/{ENZYME proteins/Hydrolases,Peptidases/Cysteine-type peptidases}	Vesicles(Supported)		(M3468)NABA ECM REGULATORS; (M5885)NABA MATRISOME ASSOCIATED; (M5889)NABA MATRISOME	(M5947)HALLMARK IL2 STAT5 SIGNALING	1.0	0.0	0.0	0.0	0.0	0.0	0.0	0.0	0.0	0.0	0.0	0.0	0.0	0.0	0.0	1.0	0.0	0.0	1.0	0.0
CUL7	9820	symbol	H. sapiens	9820	H. sapiens	CUL7	cullin 7	GO:0050775 positive regulation of dendrite morphogenesis;GO:1900006 positive regulation of dendrite development;GO:0048814 regulation of dendrite morphogenesis							0.0	0.0	0.0	0.0	0.0	0.0	0.0	0.0	0.0	0.0	0.0	0.0	0.0	0.0	1.0	0.0	0.0	0.0	0.0	0.0
CXCL1	2919	symbol	H. sapiens	2919	H. sapiens	CXCL1	C-X-C motif chemokine ligand 1	GO:0030593 neutrophil chemotaxis;GO:0043312 neutrophil degranulation;GO:0071621 granulocyte chemotaxis					(M196)PID IL23 PATHWAY; (M5883)NABA SECRETED FACTORS; (M5885)NABA MATRISOME ASSOCIATED	(M5897)HALLMARK IL6 JAK STAT3 SIGNALING; (M5921)HALLMARK COMPLEMENT; (M5930)HALLMARK EPITHELIAL MESENCHYMAL TRANSITION	1.0	1.0	0.0	0.0	1.0	0.0	0.0	1.0	0.0	0.0	1.0	0.0	1.0	0.0	0.0	1.0	0.0	1.0	0.0	0.0
CXCL14	9547	symbol	H. sapiens	9547	H. sapiens	CXCL14	C-X-C motif chemokine ligand 14	GO:2000503 positive regulation of natural killer cell chemotaxis;GO:2000501 regulation of natural killer cell chemotaxis;GO:0140131 positive regulation of lymphocyte chemotaxis					(M5883)NABA SECRETED FACTORS; (M5885)NABA MATRISOME ASSOCIATED; (M5889)NABA MATRISOME	(M5907)HALLMARK ESTROGEN RESPONSE LATE	0.0	1.0	0.0	0.0	1.0	0.0	0.0	0.0	0.0	0.0	0.0	0.0	0.0	1.0	0.0	1.0	0.0	0.0	1.0	0.0
CXCL16	58191	symbol	H. sapiens	58191	H. sapiens	CXCL16	C-X-C motif chemokine ligand 16	GO:0010818 T cell chemotaxis;GO:0048247 lymphocyte chemotaxis;GO:0072678 T cell migration		Transporters	Golgi apparatus;Vesicles(Approved)			(M5892)HALLMARK CHOLESTEROL HOMEOSTASIS	0.0	1.0	0.0	0.0	1.0	0.0	0.0	0.0	0.0	0.0	0.0	0.0	0.0	0.0	0.0	0.0	0.0	0.0	0.0	0.0
CXCL2	2920	symbol	H. sapiens	2920	H. sapiens	CXCL2	C-X-C motif chemokine ligand 2	GO:0030593 neutrophil chemotaxis;GO:0071621 granulocyte chemotaxis;GO:1990266 neutrophil migration					(M7871)ST GRANULE CELL SURVIVAL PATHWAY; (M5883)NABA SECRETED FACTORS; (M5885)NABA MATRISOME ASSOCIATED	(M5941)HALLMARK UV RESPONSE UP; (M5890)HALLMARK TNFA SIGNALING VIA NFKB	0.0	1.0	0.0	0.0	1.0	0.0	0.0	1.0	0.0	0.0	0.0	0.0	0.0	0.0	0.0	1.0	0.0	1.0	0.0	0.0
CXCL3	2921	symbol	H. sapiens	2921	H. sapiens	CXCL3	C-X-C motif chemokine ligand 3	GO:0030593 neutrophil chemotaxis;GO:0071621 granulocyte chemotaxis;GO:1990266 neutrophil migration					(M5883)NABA SECRETED FACTORS; (M5885)NABA MATRISOME ASSOCIATED; (M5889)NABA MATRISOME	(M5897)HALLMARK IL6 JAK STAT3 SIGNALING; (M5890)HALLMARK TNFA SIGNALING VIA NFKB	0.0	1.0	0.0	0.0	1.0	0.0	0.0	1.0	0.0	0.0	0.0	0.0	0.0	0.0	0.0	1.0	0.0	1.0	0.0	0.0
CXCL5	6374	symbol	H. sapiens	6374	H. sapiens	CXCL5	C-X-C motif chemokine ligand 5	GO:0030593 neutrophil chemotaxis;GO:0071621 granulocyte chemotaxis;GO:1990266 neutrophil migration					(M5883)NABA SECRETED FACTORS; (M5885)NABA MATRISOME ASSOCIATED; (M5889)NABA MATRISOME		0.0	1.0	0.0	0.0	1.0	0.0	0.0	1.0	0.0	0.0	0.0	0.0	1.0	0.0	0.0	1.0	0.0	1.0	0.0	0.0
CXCL6	6372	symbol	H. sapiens	6372	H. sapiens	CXCL6	C-X-C motif chemokine ligand 6	GO:0070951 regulation of neutrophil mediated killing of gram-negative bacterium;GO:0070950 regulation of neutrophil mediated killing of bacterium;GO:0070945 neutrophil mediated killing of gram-negative bacterium					(M5883)NABA SECRETED FACTORS; (M5885)NABA MATRISOME ASSOCIATED; (M5889)NABA MATRISOME	(M5944)HALLMARK ANGIOGENESIS; (M5932)HALLMARK INFLAMMATORY RESPONSE; (M5930)HALLMARK EPITHELIAL MESENCHYMAL TRANSITION	1.0	1.0	0.0	1.0	1.0	1.0	0.0	1.0	0.0	0.0	0.0	0.0	1.0	0.0	0.0	1.0	0.0	1.0	0.0	0.0
CXCL8	3576	symbol	H. sapiens	3576	H. sapiens	CXCL8	C-X-C motif chemokine ligand 8	GO:2000535 regulation of entry of bacterium into host cell;GO:0045091 regulation of single stranded viral RNA replication via double stranded DNA intermediate;GO:0090023 positive regulation of neutrophil chemotaxis				ABT-510 (Interleukin-8 receptor binding);MDX-018 (Interleukin-8 receptor binding);Rivanicline (Interleukin-8 receptor binding)	(M251)PID SYNDECAN 3 PATHWAY; (M252)PID IL8 CXCR1 PATHWAY; (M240)PID SYNDECAN 2 PATHWAY	(M5932)HALLMARK INFLAMMATORY RESPONSE; (M5930)HALLMARK EPITHELIAL MESENCHYMAL TRANSITION	1.0	1.0	1.0	0.0	1.0	0.0	0.0	1.0	0.0	0.0	1.0	0.0	1.0	1.0	0.0	1.0	0.0	1.0	0.0	0.0
CXCR1	3577	symbol	H. sapiens	3577	H. sapiens	CXCR1	C-X-C motif chemokine receptor 1	GO:0038112 interleukin-8-mediated signaling pathway;GO:0098759 cellular response to interleukin-8;GO:0098758 response to interleukin-8		CD markers;G-protein coupled receptors/{Chemokines and chemotactic factors receptors,GPCRs excl olfactory receptors}		Ketoprofen (Interleukin-8 receptor activity)	(M252)PID IL8 CXCR1 PATHWAY		1.0	1.0	0.0	0.0	1.0	0.0	0.0	0.0	0.0	0.0	0.0	0.0	0.0	0.0	0.0	0.0	0.0	0.0	0.0	0.0
CXCR2	3579	symbol	H. sapiens	3579	H. sapiens	CXCR2	C-X-C motif chemokine receptor 2	GO:0033030 negative regulation of neutrophil apoptotic process;GO:0038112 interleukin-8-mediated signaling pathway;GO:0072173 metanephric tubule morphogenesis		CD markers;G-protein coupled receptors/{Chemokines and chemotactic factors receptors,GPCRs excl olfactory receptors}			(M7871)ST GRANULE CELL SURVIVAL PATHWAY; (M210)PID IL8 CXCR2 PATHWAY		1.0	1.0	0.0	0.0	1.0	0.0	0.0	0.0	0.0	0.0	1.0	0.0	0.0	1.0	0.0	0.0	0.0	0.0	0.0	0.0
CXCR3	2833	symbol	H. sapiens	2833	H. sapiens	CXCR3	C-X-C motif chemokine receptor 3	GO:0010818 T cell chemotaxis;GO:0048247 lymphocyte chemotaxis;GO:0072678 T cell migration		CD markers;G-protein coupled receptors/{Chemokines and chemotactic factors receptors,GPCRs excl olfactory receptors}			(M222)PID CXCR3 PATHWAY	(M5950)HALLMARK ALLOGRAFT REJECTION	0.0	1.0	1.0	0.0	1.0	0.0	0.0	0.0	0.0	0.0	0.0	0.0	0.0	0.0	0.0	0.0	0.0	0.0	0.0	0.0
CXCR4	7852	symbol	H. sapiens	7852	H. sapiens	CXCR4	C-X-C motif chemokine receptor 4	GO:0035470 positive regulation of vascular wound healing;GO:0019064 fusion of virus membrane with host plasma membrane;GO:0038160 CXCL12-activated CXCR4 signaling pathway		CD markers;G-protein coupled receptors/{Chemokines and chemotactic factors receptors,GPCRs excl olfactory receptors};Transporters		Framycetin (Virus receptor activity);AMD-070 (Virus receptor activity);Plerixafor (Virus receptor activity)	(M55)PID S1P S1P3 PATHWAY; (M257)PID EPHRINB REV PATHWAY; (M165)PID SYNDECAN 4 PATHWAY	(M5923)HALLMARK PI3K AKT MTOR SIGNALING; (M5953)HALLMARK KRAS SIGNALING UP; (M5891)HALLMARK HYPOXIA	0.0	1.0	1.0	0.0	1.0	0.0	0.0	0.0	0.0	0.0	0.0	0.0	1.0	1.0	0.0	0.0	0.0	0.0	0.0	1.0
CXCR6	10663	symbol	H. sapiens	10663	H. sapiens	CXCR6	C-X-C motif chemokine receptor 6	GO:0070098 chemokine-mediated signaling pathway;GO:0007204 positive regulation of cytosolic calcium ion concentration;GO:0019079 viral genome replication		CD markers;G-protein coupled receptors/{Chemokines and chemotactic factors receptors,GPCRs excl olfactory receptors}				(M5932)HALLMARK INFLAMMATORY RESPONSE	0.0	1.0	0.0	0.0	1.0	0.0	0.0	0.0	0.0	0.0	0.0	0.0	0.0	0.0	0.0	0.0	0.0	0.0	0.0	0.0
CXorf21	80231	symbol	H. sapiens	80231	H. sapiens	CXorf21	chromosome X open reading frame 21	GO:0035751 regulation of lysosomal lumen pH;GO:0051453 regulation of intracellular pH;GO:0030641 regulation of cellular pH			Nucleoplasm;Vesicles(Approved)				0.0	0.0	0.0	0.0	0.0	0.0	0.0	0.0	0.0	0.0	0.0	0.0	0.0	0.0	0.0	0.0	0.0	0.0	0.0	0.0
CYB561	1534	symbol	H. sapiens	1534	H. sapiens	CYB561	cytochrome b561	GO:0022900 electron transport chain;GO:0006091 generation of precursor metabolites and energy;GO:0055114 oxidation-reduction process		Transporters/Transport Electron Carriers					0.0	0.0	0.0	0.0	0.0	0.0	0.0	0.0	0.0	0.0	0.0	0.0	0.0	0.0	0.0	0.0	0.0	0.0	0.0	0.0
CYB561A3	220002	symbol	H. sapiens	220002	H. sapiens	CYB561A3	cytochrome b561 family member A3	GO:0055114 oxidation-reduction process;GO:0008152 metabolic process;GO:0008150 biological_process							0.0	0.0	0.0	0.0	0.0	0.0	0.0	0.0	0.0	0.0	0.0	0.0	0.0	0.0	0.0	0.0	0.0	0.0	0.0	0.0
CYBA	1535	symbol	H. sapiens	1535	H. sapiens	CYBA	cytochrome b-245 alpha chain	GO:0003106 negative regulation of glomerular filtration by angiotensin;GO:0003083 negative regulation of renal output by angiotensin;GO:0034137 positive regulation of toll-like receptor 2 signaling pathway		Transporters/Transport Electron Carriers			(M278)PID RAC1 PATHWAY		1.0	0.0	0.0	1.0	0.0	0.0	1.0	1.0	1.0	0.0	0.0	0.0	1.0	1.0	1.0	0.0	1.0	0.0	0.0	1.0
CYBB	1536	symbol	H. sapiens	1536	H. sapiens	CYBB	cytochrome b-245 beta chain	GO:1904845 cellular response to L-glutamine;GO:1904044 response to aldosterone;GO:1904844 response to L-glutamine		Transporters/Transport Electron Carriers		Dextromethorphan (Voltage-gated ion channel activity)	(M278)PID RAC1 PATHWAY	(M5932)HALLMARK INFLAMMATORY RESPONSE	1.0	0.0	0.0	1.0	0.0	0.0	0.0	0.0	0.0	0.0	0.0	0.0	1.0	0.0	1.0	0.0	1.0	0.0	0.0	0.0
CYP1B1	1545	symbol	H. sapiens	1545	H. sapiens	CYP1B1	cytochrome P450 family 1 subfamily B member 1	GO:0061304 retinal blood vessel morphogenesis;GO:0097267 omega-hydroxylase P450 pathway;GO:0002930 trabecular meshwork development		Enzymes/ENZYME proteins/Oxidoreductases	Mitochondria(Uncertain)	2-Methoxyestradiol (Oxygen binding)			0.0	0.0	1.0	1.0	0.0	0.0	0.0	0.0	0.0	0.0	1.0	1.0	0.0	0.0	0.0	0.0	0.0	0.0	0.0	0.0
CYP2S1	29785	symbol	H. sapiens	29785	H. sapiens	CYP2S1	cytochrome P450 family 2 subfamily S member 1	GO:0019373 epoxygenase P450 pathway;GO:0042573 retinoic acid metabolic process;GO:0006693 prostaglandin metabolic process		Enzymes/ENZYME proteins/Oxidoreductases	Endoplasmic reticulum(Approved)			(M5934)HALLMARK XENOBIOTIC METABOLISM	0.0	0.0	0.0	0.0	0.0	0.0	0.0	0.0	0.0	0.0	0.0	0.0	0.0	0.0	0.0	0.0	0.0	0.0	0.0	0.0
CYP4F22	126410	symbol	H. sapiens	126410	H. sapiens	CYP4F22	cytochrome P450 family 4 subfamily F member 22	GO:0046513 ceramide biosynthetic process;GO:0006672 ceramide metabolic process;GO:0030148 sphingolipid biosynthetic process							0.0	0.0	0.0	0.0	0.0	0.0	0.0	0.0	0.0	0.0	0.0	0.0	0.0	0.0	0.0	0.0	0.0	0.0	0.0	0.0
CYP4V2	285440	symbol	H. sapiens	285440	H. sapiens	CYP4V2	cytochrome P450 family 4 subfamily V member 2	GO:0010430 fatty acid omega-oxidation;GO:0001523 retinoid metabolic process;GO:0016101 diterpenoid metabolic process		Enzymes/ENZYME proteins/Oxidoreductases	Nuclear speckles(Approved)				0.0	0.0	0.0	0.0	0.0	0.0	0.0	0.0	0.0	0.0	0.0	0.0	0.0	0.0	0.0	0.0	0.0	0.0	0.0	0.0
CYR61	3491	gene_synonym	H. sapiens	3491	H. sapiens	CCN1	cellular communication network factor 1	GO:0002041 intussusceptive angiogenesis;GO:2000304 positive regulation of ceramide biosynthetic process;GO:0060710 chorio-allantoic fusion					(M212)PID INTEGRIN5 PATHWAY; (M169)PID INTEGRIN2 PATHWAY; (M53)PID INTEGRIN3 PATHWAY	(M5942)HALLMARK UV RESPONSE DN; (M5891)HALLMARK HYPOXIA; (M5890)HALLMARK TNFA SIGNALING VIA NFKB	0.0	0.0	1.0	0.0	1.0	0.0	0.0	0.0	0.0	0.0	0.0	1.0	0.0	0.0	0.0	0.0	0.0	0.0	0.0	1.0
CYTH4	27128	symbol	H. sapiens	27128	H. sapiens	CYTH4	cytohesin 4	GO:0032012 regulation of ARF protein signal transduction;GO:0032011 ARF protein signal transduction;GO:0046578 regulation of Ras protein signal transduction							0.0	0.0	0.0	0.0	0.0	0.0	0.0	0.0	0.0	0.0	0.0	0.0	0.0	0.0	0.0	0.0	0.0	0.0	0.0	0.0
CYTIP	9595	symbol	H. sapiens	9595	H. sapiens	CYTIP	cytohesin 1 interacting protein	GO:0030155 regulation of cell adhesion;GO:0007155 cell adhesion;GO:0022610 biological adhesion			Cytosol;Nucleoplasm(Approved)				0.0	0.0	1.0	0.0	0.0	0.0	0.0	0.0	0.0	0.0	0.0	0.0	0.0	0.0	0.0	0.0	0.0	0.0	0.0	0.0
DAB2	1601	symbol	H. sapiens	1601	H. sapiens	DAB2	DAB adaptor protein 2	GO:2000096 positive regulation of Wnt signaling pathway, planar cell polarity pathway;GO:0060766 negative regulation of androgen receptor signaling pathway;GO:2000095 regulation of Wnt signaling pathway, planar cell polarity pathway			Plasma membrane;Vesicles(Enhanced)Nucleoli fibrillar center(Approved)		(M286)PID TGFBR PATHWAY	(M5942)HALLMARK UV RESPONSE DN; (M5930)HALLMARK EPITHELIAL MESENCHYMAL TRANSITION	0.0	0.0	0.0	0.0	1.0	0.0	0.0	1.0	0.0	0.0	0.0	0.0	0.0	0.0	0.0	0.0	0.0	0.0	0.0	0.0
DAPP1	27071	symbol	H. sapiens	27071	H. sapiens	DAPP1	dual adaptor of phosphotyrosine and 3-phosphoinositides 1	GO:0006470 protein dephosphorylation;GO:0016311 dephosphorylation;GO:0006796 phosphate-containing compound metabolic process				Inositol 1,3,4,5-Tetrakisphosphate (Phospholipid binding)	(M1315)SIG PIP3 SIGNALING IN B LYMPHOCYTES; (M14532)ST PHOSPHOINOSITIDE 3 KINASE PATHWAY; (M141)PID PI3KCI PATHWAY	(M5923)HALLMARK PI3K AKT MTOR SIGNALING; (M5924)HALLMARK MTORC1 SIGNALING	0.0	0.0	0.0	0.0	0.0	0.0	0.0	0.0	0.0	0.0	0.0	0.0	0.0	0.0	1.0	0.0	0.0	0.0	0.0	0.0
DCBLD2	131566	symbol	H. sapiens	131566	H. sapiens	DCBLD2	discoidin, CUB and LCCL domain containing 2	GO:0030308 negative regulation of cell growth;GO:0045926 negative regulation of growth;GO:0030522 intracellular receptor signaling pathway			Cytosol;Golgi apparatus;Plasma membrane(Approved)			(M5916)HALLMARK APICAL SURFACE; (M5932)HALLMARK INFLAMMATORY RESPONSE; (M5953)HALLMARK KRAS SIGNALING UP	0.0	0.0	0.0	0.0	0.0	0.0	0.0	0.0	0.0	0.0	0.0	0.0	0.0	0.0	0.0	0.0	0.0	0.0	0.0	1.0
DCDC2B	149069	symbol	H. sapiens	149069	H. sapiens	DCDC2B	doublecortin domain containing 2B	GO:0035556 intracellular signal transduction;GO:0007165 signal transduction;GO:0023052 signaling							0.0	0.0	0.0	0.0	0.0	0.0	0.0	0.0	0.0	0.0	0.0	0.0	0.0	0.0	0.0	0.0	0.0	0.0	0.0	0.0
DCUN1D3	123879	symbol	H. sapiens	123879	H. sapiens	DCUN1D3	defective in cullin neddylation 1 domain containing 3	GO:0051443 positive regulation of ubiquitin-protein transferase activity;GO:0010225 response to UV-C;GO:2000134 negative regulation of G1/S transition of mitotic cell cycle			Cytosol;Nucleoplasm(Approved)				0.0	0.0	0.0	0.0	0.0	0.0	0.0	0.0	0.0	0.0	0.0	0.0	0.0	0.0	0.0	0.0	0.0	0.0	0.0	0.0
DEF6	50619	symbol	H. sapiens	50619	H. sapiens	DEF6	DEF6 guanine nucleotide exchange factor				Nucleoplasm(Enhanced)		(M241)PID RAC1 REG PATHWAY; (M68)PID RHOA REG PATHWAY	(M5939)HALLMARK P53 PATHWAY	0.0	0.0	0.0	0.0	0.0	0.0	0.0	0.0	0.0	0.0	0.0	0.0	0.0	0.0	0.0	0.0	0.0	0.0	0.0	0.0
DENND1C	79958	symbol	H. sapiens	79958	H. sapiens	DENND1C	DENN domain containing 1C	GO:0032456 endocytic recycling;GO:0016197 endosomal transport;GO:0006897 endocytosis							0.0	0.0	0.0	0.0	0.0	0.0	0.0	0.0	0.0	0.0	0.0	0.0	0.0	0.0	0.0	0.0	0.0	0.0	0.0	0.0
DENND2D	79961	symbol	H. sapiens	79961	H. sapiens	DENND2D	DENN domain containing 2D				Cytosol(Supported)Nucleoplasm(Uncertain)				0.0	0.0	0.0	0.0	0.0	0.0	0.0	0.0	0.0	0.0	0.0	0.0	0.0	0.0	0.0	0.0	0.0	0.0	0.0	0.0
DENND3	22898	symbol	H. sapiens	22898	H. sapiens	DENND3	DENN domain containing 3	GO:0008333 endosome to lysosome transport;GO:0007041 lysosomal transport;GO:0007034 vacuolar transport			Cytosol;Vesicles(Approved)				0.0	0.0	0.0	0.0	0.0	0.0	0.0	0.0	0.0	0.0	0.0	0.0	0.0	0.0	0.0	0.0	0.0	0.0	0.0	0.0
DGKA	1606	symbol	H. sapiens	1606	H. sapiens	DGKA	diacylglycerol kinase alpha	GO:0006654 phosphatidic acid biosynthetic process;GO:0046339 diacylglycerol metabolic process;GO:0046473 phosphatidic acid metabolic process		Enzymes/ENZYME proteins/Transferases	Mitochondria;Nucleoplasm;Vesicles(Approved)	Vitamin E (Phospholipid binding)	(M60)PID NFAT TFPATHWAY	(M5939)HALLMARK P53 PATHWAY	0.0	0.0	0.0	0.0	0.0	0.0	0.0	0.0	0.0	0.0	0.0	0.0	0.0	0.0	0.0	0.0	0.0	0.0	0.0	1.0
DIO1	1733	symbol	H. sapiens	1733	H. sapiens	DIO1	iodothyronine deiodinase 1	GO:0006590 thyroid hormone generation;GO:0042403 thyroid hormone metabolic process;GO:0042446 hormone biosynthetic process		Enzymes/ENZYME proteins/Oxidoreductases				(M5949)HALLMARK PEROXISOME; (M5948)HALLMARK BILE ACID METABOLISM	0.0	0.0	0.0	0.0	0.0	0.0	0.0	0.0	0.0	0.0	0.0	0.0	0.0	0.0	0.0	0.0	0.0	0.0	0.0	0.0
DNAH1	25981	symbol	H. sapiens	25981	H. sapiens	DNAH1	dynein axonemal heavy chain 1	GO:0007288 sperm axoneme assembly;GO:0036159 inner dynein arm assembly;GO:0060294 cilium movement involved in cell motility							0.0	0.0	0.0	0.0	0.0	0.0	0.0	0.0	0.0	0.0	0.0	0.0	0.0	0.0	0.0	0.0	0.0	0.0	0.0	0.0
DNAH5	1767	symbol	H. sapiens	1767	H. sapiens	DNAH5	dynein axonemal heavy chain 5	GO:0036158 outer dynein arm assembly;GO:0021670 lateral ventricle development;GO:0070286 axonemal dynein complex assembly							0.0	0.0	0.0	0.0	0.0	0.0	0.0	0.0	0.0	0.0	0.0	0.0	0.0	0.0	0.0	0.0	0.0	0.0	0.0	0.0
DNASE1L1	1774	symbol	H. sapiens	1774	H. sapiens	DNASE1L1	deoxyribonuclease 1 like 1	GO:0000737 DNA catabolic process, endonucleolytic;GO:0043312 neutrophil degranulation;GO:0002283 neutrophil activation involved in immune response							1.0	0.0	0.0	0.0	0.0	0.0	0.0	0.0	0.0	0.0	0.0	0.0	0.0	0.0	0.0	0.0	0.0	0.0	0.0	0.0
DOCK2	1794	symbol	H. sapiens	1794	H. sapiens	DOCK2	dedicator of cytokinesis 2	GO:0045060 negative thymic T cell selection;GO:0045059 positive thymic T cell selection;GO:0001766 membrane raft polarization					(M210)PID IL8 CXCR2 PATHWAY; (M241)PID RAC1 REG PATHWAY	(M5893)HALLMARK MITOTIC SPINDLE; (M5953)HALLMARK KRAS SIGNALING UP	1.0	0.0	1.0	0.0	1.0	0.0	0.0	0.0	0.0	1.0	0.0	0.0	0.0	0.0	0.0	0.0	0.0	0.0	0.0	1.0
DOCK5	80005	symbol	H. sapiens	80005	H. sapiens	DOCK5	dedicator of cytokinesis 5	GO:1904694 negative regulation of vascular smooth muscle contraction;GO:0003056 regulation of vascular smooth muscle contraction;GO:0045906 negative regulation of vasoconstriction			Cytosol(Enhanced)				0.0	0.0	1.0	0.0	1.0	0.0	0.0	0.0	0.0	0.0	0.0	0.0	0.0	0.0	0.0	0.0	0.0	0.0	0.0	1.0
DOCK8	81704	symbol	H. sapiens	81704	H. sapiens	DOCK8	dedicator of cytokinesis 8	GO:1903905 positive regulation of establishment of T cell polarity;GO:0061485 memory T cell proliferation;GO:1903903 regulation of establishment of T cell polarity			Centrosome(Supported)Cytosol;Mitochondria;Nucleoplasm(Approved)				0.0	0.0	1.0	0.0	1.0	0.0	0.0	0.0	0.0	0.0	0.0	0.0	0.0	0.0	0.0	0.0	0.0	0.0	0.0	1.0
DOK2	9046	symbol	H. sapiens	9046	H. sapiens	DOK2	docking protein 2	GO:0007411 axon guidance;GO:0097485 neuron projection guidance;GO:0007409 axonogenesis					(M92)PID ANGIOPOIETIN RECEPTOR PATHWAY; (M122)PID IL2 1PATHWAY; (M28)PID IL4 2PATHWAY		0.0	0.0	0.0	0.0	1.0	0.0	0.0	0.0	0.0	0.0	0.0	0.0	0.0	0.0	0.0	0.0	0.0	0.0	0.0	1.0
DOK3	79930	symbol	H. sapiens	79930	H. sapiens	DOK3	docking protein 3	GO:0043312 neutrophil degranulation;GO:0002283 neutrophil activation involved in immune response;GO:0042119 neutrophil activation							1.0	0.0	0.0	0.0	0.0	0.0	0.0	0.0	0.0	0.0	0.0	0.0	0.0	0.0	0.0	0.0	0.0	0.0	0.0	0.0
DPEP2	64174	symbol	H. sapiens	64174	H. sapiens	DPEP2	dipeptidase 2	GO:0006508 proteolysis;GO:0019538 protein metabolic process;GO:1901564 organonitrogen compound metabolic process		Enzymes/{ENZYME proteins/Hydrolases,Peptidases/Metallopeptidases}					0.0	0.0	0.0	0.0	0.0	0.0	0.0	0.0	0.0	0.0	0.0	0.0	0.0	0.0	0.0	0.0	0.0	0.0	0.0	0.0
DPP4	1803	symbol	H. sapiens	1803	H. sapiens	DPP4	dipeptidyl peptidase 4	GO:0090024 negative regulation of neutrophil chemotaxis;GO:0071623 negative regulation of granulocyte chemotaxis;GO:1902623 negative regulation of neutrophil migration		CD markers;Enzymes/{ENZYME proteins/Hydrolases,Peptidases/Serine-type peptidases}		Atorvastatin (Virus receptor activity);Sitagliptin (Virus receptor activity);2-Amino-3-Methyl-1-Pyrrolidin-1-Yl-Butan-1-One (Virus receptor activity);5-(Aminomethyl)-6-(2,4-Dichlorophenyl)-2-(3,5-Dimethoxyphenyl)Pyrimidin-4-Amine (Virus receptor activity);(2s)-Pyrrolidin-2-Ylmethylamine (Virus receptor activity);4-Iodo-L-phenylalanine (Virus receptor activity);Diisopropylphosphono Group (Virus re…		(M5957)HALLMARK PANCREAS BETA CELLS; (M5946)HALLMARK COAGULATION; (M5921)HALLMARK COMPLEMENT	0.0	0.0	1.0	1.0	1.0	0.0	0.0	0.0	0.0	0.0	1.0	1.0	0.0	0.0	0.0	0.0	0.0	0.0	0.0	0.0
DPYD	1806	symbol	H. sapiens	1806	H. sapiens	DPYD	dihydropyrimidine dehydrogenase	GO:0006214 thymidine catabolic process;GO:0046127 pyrimidine deoxyribonucleoside catabolic process;GO:0046104 thymidine metabolic process		Enzymes/ENZYME proteins/Oxidoreductases		(5s)-5-Iododihydro-2,4(1h,3h)-Pyrimidinedione (Protein homodimerization activity);Nadph Dihydro-Nicotinamide-Adenine-Dinucleotidephosphate (Protein homodimerization activity);6-Carboxymethyluracil (Protein homodimerization activity);Flavin adenine dinucleotide (Protein homodimerization activity);Riboflavin Monophosphate (Protein homodimerization activity);Uracil (Protein homodimerization activity…		(M5902)HALLMARK APOPTOSIS	0.0	0.0	0.0	0.0	0.0	0.0	0.0	0.0	0.0	0.0	0.0	0.0	0.0	0.0	0.0	0.0	0.0	0.0	0.0	0.0
DRAM1	55332	symbol	H. sapiens	55332	H. sapiens	DRAM1	DNA damage regulated autophagy modulator 1	GO:0010506 regulation of autophagy;GO:0006914 autophagy;GO:0031329 regulation of cellular catabolic process						(M5939)HALLMARK P53 PATHWAY; (M5890)HALLMARK TNFA SIGNALING VIA NFKB	0.0	0.0	0.0	0.0	0.0	0.0	0.0	0.0	0.0	0.0	0.0	0.0	0.0	0.0	0.0	0.0	0.0	0.0	0.0	0.0
DSC2	1824	symbol	H. sapiens	1824	H. sapiens	DSC2	desmocollin 2	GO:0086073 bundle of His cell-Purkinje myocyte adhesion involved in cell communication;GO:0098911 regulation of ventricular cardiac muscle cell action potential;GO:0086069 bundle of His cell to Purkinje myocyte communication						(M5937)HALLMARK GLYCOLYSIS	0.0	0.0	0.0	0.0	0.0	0.0	0.0	0.0	0.0	0.0	0.0	0.0	0.0	0.0	0.0	0.0	0.0	0.0	0.0	0.0
DSE	29940	symbol	H. sapiens	29940	H. sapiens	DSE	dermatan sulfate epimerase	GO:0030208 dermatan sulfate biosynthetic process;GO:0030205 dermatan sulfate metabolic process;GO:0050651 dermatan sulfate proteoglycan biosynthetic process		Enzymes/ENZYME proteins/Isomerase	Cytosol;Nucleoplasm(Supported)				0.0	0.0	0.0	0.0	0.0	0.0	0.0	0.0	0.0	0.0	0.0	0.0	0.0	0.0	0.0	0.0	0.0	0.0	0.0	0.0
DUSP23	54935	symbol	H. sapiens	54935	H. sapiens	DUSP23	dual specificity phosphatase 23	GO:0035335 peptidyl-tyrosine dephosphorylation;GO:0006470 protein dephosphorylation;GO:0016311 dephosphorylation		Enzymes/ENZYME proteins/Hydrolases	Nucleoplasm(Supported)	4-Nitrophenyl Phosphate (Protein tyrosine/serine/threonine phosphatase activity)			0.0	0.0	0.0	0.0	0.0	0.0	0.0	0.0	0.0	0.0	0.0	0.0	0.0	0.0	0.0	0.0	0.0	0.0	0.0	0.0
DUSP3	1845	symbol	H. sapiens	1845	H. sapiens	DUSP3	dual specificity phosphatase 3	GO:0120183 positive regulation of focal adhesion disassembly;GO:0120182 regulation of focal adhesion disassembly;GO:0050860 negative regulation of T cell receptor signaling pathway		Enzymes/ENZYME proteins/Hydrolases	Nucleoplasm(Supported)Cytosol(Approved)			(M5923)HALLMARK PI3K AKT MTOR SIGNALING	0.0	1.0	1.0	0.0	1.0	0.0	1.0	0.0	0.0	0.0	1.0	0.0	0.0	0.0	0.0	0.0	0.0	0.0	0.0	0.0
DYNLT3	6990	symbol	H. sapiens	6990	H. sapiens	DYNLT3	dynein light chain Tctex-type 3	GO:0045931 positive regulation of mitotic cell cycle;GO:0045787 positive regulation of cell cycle;GO:0007346 regulation of mitotic cell cycle						(M5906)HALLMARK ESTROGEN RESPONSE EARLY; (M5907)HALLMARK ESTROGEN RESPONSE LATE	0.0	0.0	0.0	0.0	0.0	0.0	0.0	0.0	0.0	0.0	0.0	0.0	0.0	0.0	0.0	0.0	0.0	0.0	0.0	0.0
DYRK3	8444	symbol	H. sapiens	8444	H. sapiens	DYRK3	dual specificity tyrosine phosphorylation regulated kinase 3	GO:0035063 nuclear speck organization;GO:0035617 stress granule disassembly;GO:0043518 negative regulation of DNA damage response, signal transduction by p53 class mediator	CMGC Ser/Thr protein kinase family	Enzymes/{ENZYME proteins/Transferases,Kinases/CMGC Ser/Thr protein kinases}	Nucleoplasm(Supported)Cytosol(Uncertain)			(M5950)HALLMARK ALLOGRAFT REJECTION	0.0	0.0	0.0	0.0	0.0	0.0	0.0	0.0	0.0	0.0	0.0	0.0	0.0	0.0	0.0	0.0	0.0	0.0	1.0	0.0
DZIP1L	199221	symbol	H. sapiens	199221	H. sapiens	DZIP1L	DAZ interacting zinc finger protein 1 like	GO:1905349 ciliary transition zone assembly;GO:0033504 floor plate development;GO:0021532 neural tube patterning			Cytokinetic bridge;Microtubules;Nucleoplasm(Approved)				0.0	0.0	0.0	0.0	0.0	0.0	0.0	0.0	0.0	0.0	0.0	0.0	0.0	0.0	0.0	0.0	0.0	0.0	0.0	0.0
ECHDC2	55268	symbol	H. sapiens	55268	H. sapiens	ECHDC2	enoyl-CoA hydratase domain containing 2	GO:0006635 fatty acid beta-oxidation;GO:0009062 fatty acid catabolic process;GO:0019395 fatty acid oxidation			Mitochondria(Approved)				0.0	0.0	0.0	0.0	0.0	0.0	0.0	0.0	0.0	0.0	0.0	0.0	0.0	0.0	0.0	0.0	0.0	0.0	0.0	0.0
ECM1	1893	symbol	H. sapiens	1893	H. sapiens	ECM1	extracellular matrix protein 1	GO:0030502 negative regulation of bone mineralization;GO:2000404 regulation of T cell migration;GO:0070168 negative regulation of biomineral tissue development			Cytosol;Nucleoplasm(Approved)		(M3008)NABA ECM GLYCOPROTEINS; (M5884)NABA CORE MATRISOME; (M5889)NABA MATRISOME	(M5947)HALLMARK IL2 STAT5 SIGNALING; (M5930)HALLMARK EPITHELIAL MESENCHYMAL TRANSITION	1.0	1.0	0.0	0.0	1.0	0.0	0.0	0.0	0.0	0.0	0.0	1.0	0.0	0.0	0.0	0.0	0.0	0.0	0.0	1.0
EDEM1	9695	symbol	H. sapiens	9695	H. sapiens	EDEM1	ER degradation enhancing alpha-mannosidase like protein 1	GO:1904154 positive regulation of retrograde protein transport, ER to cytosol;GO:0036510 trimming of terminal mannose on C branch;GO:1904382 mannose trimming involved in glycoprotein ERAD pathway			Endoplasmic reticulum(Approved)			(M5922)HALLMARK UNFOLDED PROTEIN RESPONSE; (M5924)HALLMARK MTORC1 SIGNALING	0.0	0.0	0.0	1.0	0.0	0.0	0.0	0.0	0.0	0.0	0.0	0.0	0.0	0.0	0.0	0.0	0.0	0.0	0.0	0.0
EFCAB13	124989	symbol	H. sapiens	124989	H. sapiens	EFCAB13	EF-hand calcium binding domain 13				Cytosol;Nucleus(Supported)Nuclear speckles(Approved)				0.0	0.0	0.0	0.0	0.0	0.0	0.0	0.0	0.0	0.0	0.0	0.0	0.0	0.0	0.0	0.0	0.0	0.0	0.0	0.0
EFEMP1	2202	symbol	H. sapiens	2202	H. sapiens	EFEMP1	EGF containing fibulin extracellular matrix protein 1	GO:0048050 post-embryonic eye morphogenesis;GO:0032331 negative regulation of chondrocyte differentiation;GO:0061037 negative regulation of cartilage development			Mitochondria(Uncertain)		(M3008)NABA ECM GLYCOPROTEINS; (M5884)NABA CORE MATRISOME; (M5889)NABA MATRISOME	(M5942)HALLMARK UV RESPONSE DN	0.0	0.0	0.0	0.0	0.0	0.0	0.0	0.0	0.0	0.0	0.0	1.0	0.0	0.0	0.0	0.0	0.0	0.0	1.0	0.0
EGF	1950	symbol	H. sapiens	1950	H. sapiens	EGF	epidermal growth factor	GO:0021940 positive regulation of cerebellar granule cell precursor proliferation;GO:1900127 positive regulation of hyaluronan biosynthetic process;GO:0021936 regulation of cerebellar granule cell precursor proliferation		RAS pathway related proteins		Sucralfate (Transmembrane receptor protein tyrosine kinase activator activity);Alpha-Aminobutyric Acid (Transmembrane receptor protein tyrosine kinase activator activity);XL647 (Transmembrane receptor protein tyrosine kinase activator activity)	(M201)PID ERBB NETWORK PATHWAY; (M127)PID ERBB1 RECEPTOR PROXIMAL PATHWAY; (M86)PID ARF6 PATHWAY	(M5956)HALLMARK KRAS SIGNALING DN; (M5901)HALLMARK G2M CHECKPOINT	1.0	1.0	0.0	0.0	1.0	0.0	0.0	0.0	0.0	0.0	0.0	0.0	0.0	0.0	0.0	1.0	0.0	0.0	0.0	1.0
EGR2	1959	symbol	H. sapiens	1959	H. sapiens	EGR2	early growth response 2	GO:0021666 rhombomere 5 formation;GO:0021660 rhombomere 3 formation;GO:0021664 rhombomere 5 morphogenesis		Transcription factors/Zinc-coordinating DNA-binding domains	Nucleoplasm(Supported)		(M2579)ST DIFFERENTIATION PATHWAY IN PC12 CELLS; (M60)PID NFAT TFPATHWAY; (M256)PID TAP63 PATHWAY	(M5890)HALLMARK TNFA SIGNALING VIA NFKB	0.0	0.0	0.0	0.0	1.0	0.0	0.0	0.0	0.0	0.0	0.0	0.0	1.0	0.0	0.0	0.0	0.0	0.0	0.0	0.0
EHBP1L1	254102	symbol	H. sapiens	254102	H. sapiens	EHBP1L1	EH domain binding protein 1 like 1	GO:0030036 actin cytoskeleton organization;GO:0030029 actin filament-based process;GO:0007010 cytoskeleton organization			Cytosol;Nucleoli;Plasma membrane(Approved)				0.0	0.0	0.0	0.0	0.0	0.0	0.0	0.0	0.0	0.0	0.0	0.0	0.0	0.0	0.0	0.0	0.0	0.0	0.0	0.0
EHD2	30846	symbol	H. sapiens	30846	H. sapiens	EHD2	EH domain containing 2	GO:2001137 positive regulation of endocytic recycling;GO:1901741 positive regulation of myoblast fusion;GO:1901739 regulation of myoblast fusion			Plasma membrane(Supported)				0.0	0.0	0.0	0.0	0.0	0.0	0.0	0.0	0.0	0.0	0.0	0.0	0.0	0.0	0.0	0.0	0.0	0.0	0.0	1.0
ELF3	1999	symbol	H. sapiens	1999	H. sapiens	ELF3	E74 like ETS transcription factor 3	GO:0060056 mammary gland involution;GO:0060443 mammary gland morphogenesis;GO:0045747 positive regulation of Notch signaling pathway		Transcription factors/Helix-turn-helix domains	Nucleoplasm(Enhanced)			(M5937)HALLMARK GLYCOLYSIS; (M5906)HALLMARK ESTROGEN RESPONSE EARLY	0.0	0.0	0.0	0.0	0.0	0.0	0.0	0.0	0.0	0.0	0.0	1.0	0.0	0.0	0.0	0.0	0.0	0.0	0.0	0.0
ELF4	2000	symbol	H. sapiens	2000	H. sapiens	ELF4	E74 like ETS transcription factor 4	GO:0001866 NK T cell proliferation;GO:0051132 NK T cell activation;GO:0001787 natural killer cell proliferation		Transcription factors/Helix-turn-helix domains	Nuclear bodies(Supported)Nucleoplasm(Approved)			(M5950)HALLMARK ALLOGRAFT REJECTION	0.0	0.0	1.0	0.0	0.0	0.0	0.0	0.0	0.0	1.0	0.0	0.0	0.0	0.0	0.0	0.0	0.0	0.0	0.0	0.0
ELK3	2004	symbol	H. sapiens	2004	H. sapiens	ELK3	ETS transcription factor ELK3	GO:0001525 angiogenesis;GO:0048514 blood vessel morphogenesis;GO:0000122 negative regulation of transcription by RNA polymerase II		Transcription factors/Helix-turn-helix domains	Nucleoplasm(Supported)Mitochondria(Approved)				0.0	0.0	0.0	0.0	0.0	0.0	0.0	0.0	0.0	0.0	0.0	0.0	0.0	0.0	0.0	0.0	0.0	0.0	0.0	1.0
ELL2	22936	symbol	H. sapiens	22936	H. sapiens	ELL2	elongation factor for RNA polymerase II 2	GO:0042795 snRNA transcription by RNA polymerase II;GO:0009301 snRNA transcription;GO:0006368 transcription elongation from RNA polymerase II promoter			Nucleoplasm(Supported)			(M5908)HALLMARK ANDROGEN RESPONSE; (M5945)HALLMARK HEME METABOLISM	0.0	0.0	0.0	0.0	0.0	0.0	0.0	0.0	0.0	0.0	0.0	0.0	0.0	0.0	0.0	0.0	0.0	0.0	0.0	0.0
EMB	133418	symbol	H. sapiens	133418	H. sapiens	EMB	embigin	GO:0035879 plasma membrane lactate transport;GO:0035873 lactate transmembrane transport;GO:0015727 lactate transport		Transporters/Accessory Factors Involved in Transport					0.0	0.0	0.0	0.0	1.0	0.0	0.0	0.0	0.0	0.0	0.0	0.0	0.0	0.0	0.0	0.0	0.0	0.0	0.0	0.0
EME2	197342	symbol	H. sapiens	197342	H. sapiens	EME2	essential meiotic structure-specific endonuclease subunit 2	GO:0031573 intra-S DNA damage checkpoint;GO:0000712 resolution of meiotic recombination intermediates;GO:0051307 meiotic chromosome separation							0.0	0.0	0.0	0.0	0.0	0.0	0.0	0.0	0.0	0.0	0.0	0.0	0.0	0.0	0.0	0.0	0.0	0.0	0.0	0.0
EMILIN1	11117	symbol	H. sapiens	11117	H. sapiens	EMILIN1	elastin microfibril interfacer 1	GO:1904027 negative regulation of collagen fibril organization;GO:1905522 negative regulation of macrophage migration;GO:1901203 positive regulation of extracellular matrix assembly					(M3008)NABA ECM GLYCOPROTEINS; (M5884)NABA CORE MATRISOME; (M5889)NABA MATRISOME		0.0	0.0	1.0	0.0	1.0	0.0	0.0	0.0	0.0	0.0	1.0	1.0	0.0	0.0	0.0	0.0	0.0	0.0	0.0	0.0
EML3	256364	symbol	H. sapiens	256364	H. sapiens	EML3	EMAP like 3	GO:0000226 microtubule cytoskeleton organization;GO:0007017 microtubule-based process;GO:0007010 cytoskeleton organization							0.0	0.0	0.0	0.0	0.0	0.0	0.0	0.0	0.0	0.0	0.0	0.0	0.0	0.0	0.0	0.0	0.0	0.0	0.0	0.0
EMR1	2015	gene_synonym	H. sapiens	2015	H. sapiens	ADGRE1	adhesion G protein-coupled receptor E1	GO:0007189 adenylate cyclase-activating G protein-coupled receptor signaling pathway;GO:0019933 cAMP-mediated signaling;GO:0007188 adenylate cyclase-modulating G protein-coupled receptor signaling pathway		G-protein coupled receptors/{Family 2 (B) receptors,GPCRs excl olfactory receptors};Transporters				(M5932)HALLMARK INFLAMMATORY RESPONSE	0.0	0.0	0.0	0.0	0.0	1.0	0.0	0.0	0.0	0.0	0.0	0.0	0.0	0.0	0.0	0.0	0.0	0.0	0.0	0.0
EMR2	30817	gene_synonym	H. sapiens	30817	H. sapiens	ADGRE2	adhesion G protein-coupled receptor E2	GO:0043304 regulation of mast cell degranulation;GO:0033006 regulation of mast cell activation involved in immune response;GO:0043303 mast cell degranulation		CD markers;G-protein coupled receptors/{Family 2 (B) receptors,GPCRs excl olfactory receptors}	Vesicles(Approved)				1.0	0.0	1.0	1.0	1.0	1.0	0.0	0.0	0.0	0.0	0.0	0.0	0.0	0.0	0.0	0.0	0.0	0.0	0.0	0.0
EMR3	84658	gene_synonym	H. sapiens	84658	H. sapiens	ADGRE3	adhesion G protein-coupled receptor E3	GO:0043312 neutrophil degranulation;GO:0002283 neutrophil activation involved in immune response;GO:0007189 adenylate cyclase-activating G protein-coupled receptor signaling pathway		G-protein coupled receptors/{Family 2 (B) receptors,GPCRs excl olfactory receptors}					1.0	0.0	0.0	0.0	0.0	0.0	0.0	0.0	0.0	0.0	0.0	0.0	0.0	0.0	0.0	0.0	0.0	0.0	0.0	0.0
ENG	2022	symbol	H. sapiens	2022	H. sapiens	ENG	endoglin	GO:1905310 regulation of cardiac neural crest cell migration involved in outflow tract morphogenesis;GO:1905007 positive regulation of epithelial to mesenchymal transition involved in endocardial cushion formation;GO:0003253 cardiac neural crest cell migration involved in outflow tract morphogenesis		CD markers			(M185)PID ALK1 PATHWAY; (M255)PID HIF1 TFPATHWAY	(M5896)HALLMARK TGF BETA SIGNALING; (M5953)HALLMARK KRAS SIGNALING UP	0.0	0.0	0.0	0.0	0.0	0.0	0.0	0.0	0.0	0.0	0.0	1.0	0.0	0.0	0.0	0.0	0.0	0.0	0.0	0.0
LRRC74B	400891	symbol	H. sapiens	400891	H. sapiens	LRRC74B	leucine rich repeat containing 74B								0.0	0.0	0.0	0.0	0.0	0.0	0.0	0.0	0.0	0.0	0.0	0.0	0.0	0.0	0.0	0.0	0.0	0.0	0.0	0.0
TCTEX1D4	343521	symbol	H. sapiens	343521	H. sapiens	TCTEX1D4	Tctex1 domain containing 4								0.0	0.0	0.0	0.0	0.0	0.0	0.0	0.0	0.0	0.0	0.0	0.0	0.0	0.0	0.0	0.0	0.0	0.0	0.0	0.0
AC099489						None	None	None	None	None	None	None	None	None	nan	nan	nan	nan	nan	nan	nan	nan	nan	nan	nan	nan	nan	nan	nan	nan	nan	nan	nan	nan
AC244197						None	None	None	None	None	None	None	None	None	nan	nan	nan	nan	nan	nan	nan	nan	nan	nan	nan	nan	nan	nan	nan	nan	nan	nan	nan	nan
3	3	Gene_ID	H. sapiens	3	H. sapiens	A2MP1	alpha-2-macroglobulin pseudogene 1								0.0	0.0	0.0	0.0	0.0	0.0	0.0	0.0	0.0	0.0	0.0	0.0	0.0	0.0	0.0	0.0	0.0	0.0	0.0	0.0
AC009690						None	None	None	None	None	None	None	None	None	nan	nan	nan	nan	nan	nan	nan	nan	nan	nan	nan	nan	nan	nan	nan	nan	nan	nan	nan	nan
AC087289						None	None	None	None	None	None	None	None	None	nan	nan	nan	nan	nan	nan	nan	nan	nan	nan	nan	nan	nan	nan	nan	nan	nan	nan	nan	nan
ARL14EPL	644100	symbol	H. sapiens	644100	H. sapiens	ARL14EPL	ADP ribosylation factor like GTPase 14 effector protein like								0.0	0.0	0.0	0.0	0.0	0.0	0.0	0.0	0.0	0.0	0.0	0.0	0.0	0.0	0.0	0.0	0.0	0.0	0.0	0.0
AC120114						None	None	None	None	None	None	None	None	None	nan	nan	nan	nan	nan	nan	nan	nan	nan	nan	nan	nan	nan	nan	nan	nan	nan	nan	nan	nan
4						None	None	None	None	None	None	None	None	None	nan	nan	nan	nan	nan	nan	nan	nan	nan	nan	nan	nan	nan	nan	nan	nan	nan	nan	nan	nan
ENSG00000281359						None	None	None	None	None	None	None	None	None	nan	nan	nan	nan	nan	nan	nan	nan	nan	nan	nan	nan	nan	nan	nan	nan	nan	nan	nan	nan
EOGT	285203	symbol	H. sapiens	285203	H. sapiens	EOGT	EGF domain specific O-linked N-acetylglucosamine transferase	GO:0006493 protein O-linked glycosylation;GO:0006486 protein glycosylation;GO:0043413 macromolecule glycosylation		Enzymes/ENZYME proteins/Transferases	Cytosol;Nuclear membrane;Nucleoplasm(Approved)				0.0	0.0	0.0	0.0	0.0	0.0	0.0	0.0	0.0	0.0	0.0	0.0	0.0	0.0	0.0	0.0	0.0	0.0	0.0	0.0
EOMES	8320	symbol	H. sapiens	8320	H. sapiens	EOMES	eomesodermin	GO:0002302 CD8-positive, alpha-beta T cell differentiation involved in immune response;GO:0021796 cerebral cortex regionalization;GO:0001714 endodermal cell fate specification		Transcription factors/Immunoglobulin fold			(M54)PID IL12 2PATHWAY; (M272)PID CD8 TCR DOWNSTREAM PATHWAY	(M5947)HALLMARK IL2 STAT5 SIGNALING	1.0	0.0	1.0	0.0	0.0	1.0	0.0	0.0	0.0	1.0	0.0	0.0	0.0	0.0	0.0	0.0	0.0	0.0	0.0	0.0
EPHA1	2041	symbol	H. sapiens	2041	H. sapiens	EPHA1	EPH receptor A1	GO:0051496 positive regulation of stress fiber assembly;GO:0051492 regulation of stress fiber assembly;GO:0032233 positive regulation of actin filament bundle assembly	Tyr protein kinase family	Enzymes/{ENZYME proteins/Transferases,Kinases/Tyr protein kinases}			(M177)PID EPHA FWDPATHWAY		0.0	0.0	1.0	0.0	1.0	0.0	0.0	0.0	0.0	0.0	0.0	0.0	0.0	0.0	0.0	0.0	0.0	0.0	0.0	0.0
EPPK1	83481	symbol	H. sapiens	83481	H. sapiens	EPPK1	epiplakin 1	GO:0051548 negative regulation of keratinocyte migration;GO:1905041 regulation of epithelium regeneration;GO:0045110 intermediate filament bundle assembly			Intermediate filaments(Enhanced)				0.0	0.0	0.0	0.0	0.0	0.0	0.0	0.0	0.0	0.0	1.0	0.0	0.0	0.0	0.0	0.0	0.0	0.0	0.0	1.0
EREG	2069	symbol	H. sapiens	2069	H. sapiens	EREG	epiregulin	GO:0001550 ovarian cumulus expansion;GO:0048160 primary follicle stage;GO:0048165 fused antrum stage			Vesicles(Approved)		(M201)PID ERBB NETWORK PATHWAY; (M13)PID ERBB4 PATHWAY; (M5883)NABA SECRETED FACTORS	(M5902)HALLMARK APOPTOSIS; (M5932)HALLMARK INFLAMMATORY RESPONSE; (M5953)HALLMARK KRAS SIGNALING UP	0.0	1.0	0.0	1.0	0.0	0.0	0.0	0.0	1.0	0.0	1.0	0.0	0.0	0.0	0.0	1.0	0.0	0.0	1.0	1.0
ERO1L	30001	gene_synonym	H. sapiens	30001	H. sapiens	ERO1A	endoplasmic reticulum oxidoreductase 1 alpha	GO:0051209 release of sequestered calcium ion into cytosol;GO:0010260 animal organ senescence;GO:0097553 calcium ion transmembrane import into cytosol						(M5922)HALLMARK UNFOLDED PROTEIN RESPONSE; (M5953)HALLMARK KRAS SIGNALING UP; (M5891)HALLMARK HYPOXIA	0.0	0.0	0.0	0.0	0.0	0.0	0.0	0.0	0.0	0.0	0.0	1.0	0.0	0.0	0.0	0.0	0.0	0.0	0.0	0.0
ESPNL	339768	symbol	H. sapiens	339768	H. sapiens	ESPNL	espin like	GO:0051017 actin filament bundle assembly;GO:0061572 actin filament bundle organization;GO:0007605 sensory perception of sound							0.0	0.0	0.0	0.0	0.0	0.0	0.0	0.0	0.0	0.0	0.0	0.0	0.0	0.0	0.0	0.0	0.0	0.0	0.0	0.0
ESR1	2099	symbol	H. sapiens	2099	H. sapiens	ESR1	estrogen receptor 1	GO:0060750 epithelial cell proliferation involved in mammary gland duct elongation;GO:0060523 prostate epithelial cord elongation;GO:0060687 regulation of branching involved in prostate gland morphogenesis		Nuclear receptors;Transcription factors/Zinc-coordinating DNA-binding domains	Nucleus;Vesicles(Approved)	Diethylstilbestrol (Zinc ion binding);Chlorotrianisene (Zinc ion binding);Conjugated Equine Estrogens (Zinc ion binding);Etonogestrel (Zinc ion binding);Desogestrel (Zinc ion binding);Levonorgestrel (Zinc ion binding);Progesterone (Zinc ion binding);Raloxifene (Zinc ion binding);Toremifene (Zinc ion binding);Medroxyprogesterone acetate (Zinc ion binding);Estrone (Zinc ion binding);Tamoxifen (Zinc…	(M30)PID HDAC CLASSII PATHWAY; (M229)PID P38 ALPHA BETA DOWNSTREAM PATHWAY; (M176)PID FOXM1 PATHWAY	(M5934)HALLMARK XENOBIOTIC METABOLISM	0.0	0.0	0.0	0.0	0.0	0.0	1.0	1.0	1.0	0.0	0.0	0.0	0.0	1.0	0.0	0.0	0.0	0.0	0.0	0.0
ETV6	2120	symbol	H. sapiens	2120	H. sapiens	ETV6	ETS variant transcription factor 6	GO:0007296 vitellogenesis;GO:0097152 mesenchymal cell apoptotic process;GO:0071425 hematopoietic stem cell proliferation		Transcription factors/Helix-turn-helix domains	Nucleoli(Enhanced)Cytosol(Supported)				0.0	0.0	0.0	0.0	0.0	0.0	0.0	0.0	0.0	0.0	0.0	0.0	0.0	0.0	0.0	0.0	0.0	0.0	0.0	0.0
EVI2B	2124	symbol	H. sapiens	2124	H. sapiens	EVI2B	ecotropic viral integration site 2B	GO:0045660 positive regulation of neutrophil differentiation;GO:0045658 regulation of neutrophil differentiation;GO:0030854 positive regulation of granulocyte differentiation		CD markers					0.0	0.0	1.0	0.0	0.0	0.0	0.0	0.0	0.0	0.0	0.0	0.0	0.0	0.0	0.0	0.0	0.0	0.0	1.0	0.0
F11R	50848	symbol	H. sapiens	50848	H. sapiens	F11R	F11 receptor	GO:1901731 positive regulation of platelet aggregation;GO:0035683 memory T cell extravasation;GO:1903142 positive regulation of establishment of endothelial barrier		CD markers	Cell Junctions(Supported)Microtubules(Approved)		(M169)PID INTEGRIN2 PATHWAY; (M72)PID NECTIN PATHWAY; (M53)PID INTEGRIN3 PATHWAY		0.0	0.0	1.0	1.0	1.0	0.0	0.0	0.0	0.0	0.0	0.0	1.0	1.0	0.0	0.0	0.0	0.0	0.0	0.0	1.0
F13A1	2162	symbol	H. sapiens	2162	H. sapiens	F13A1	coagulation factor XIII A chain	GO:0072378 blood coagulation, fibrin clot formation;GO:0002576 platelet degranulation;GO:0018149 peptide cross-linking		Enzymes/ENZYME proteins/Transferases		1,2-Propanediol (Protein-glutamine gamma-glutamyltransferase activity);N-Acetyl-Serine (Protein-glutamine gamma-glutamyltransferase activity)	(M118)PID INTEGRIN A9B1 PATHWAY; (M18)PID INTEGRIN1 PATHWAY; (M3468)NABA ECM REGULATORS	(M5953)HALLMARK KRAS SIGNALING UP	1.0	1.0	0.0	0.0	0.0	0.0	0.0	0.0	0.0	0.0	0.0	0.0	0.0	0.0	0.0	1.0	0.0	0.0	0.0	1.0
F3	2152	symbol	H. sapiens	2152	H. sapiens	F3	coagulation factor III, tissue factor	GO:0002543 activation of blood coagulation via clotting cascade;GO:0007598 blood coagulation, extrinsic pathway;GO:0010641 positive regulation of platelet-derived growth factor receptor signaling pathway		CD markers	Vesicles(Enhanced)	Coagulation factor VIIa Recombinant Human (Protease binding);2-(4-HYDROXY-5-PHENYL-1H-PYRAZOL-3-YL)-1H-BENZOIMIDAZOLE-5-CARBOXAMIDINE (Protease binding);[2'-HYDROXY-3'-(1H-PYRROLO[3,2-C]PYRIDIN-2-YL)-BIPHENYL-3-YLMETHYL]-UREA (Protease binding);{5-(5-AMINO-1H-PYRROLO[3,2-B]PYRIDIN-2-YL)-6-HYDROXY-3'-NITRO-BIPHENYL-3-YL]-ACETIC ACID (Protease binding)		(M5946)HALLMARK COAGULATION; (M5942)HALLMARK UV RESPONSE DN; (M5932)HALLMARK INFLAMMATORY RESPONSE	0.0	1.0	0.0	0.0	1.0	0.0	0.0	0.0	0.0	0.0	0.0	0.0	0.0	1.0	0.0	0.0	0.0	0.0	0.0	1.0
FAH	2184	symbol	H. sapiens	2184	H. sapiens	FAH	fumarylacetoacetate hydrolase	GO:1902000 homogentisate catabolic process;GO:0006527 arginine catabolic process;GO:0006559 L-phenylalanine catabolic process		Enzymes/ENZYME proteins/Hydrolases	Cytosol(Approved)	Fumarate (Metal ion binding);Acetoacetic Acid (Metal ion binding);4-[Hydroxy-[Methyl-Phosphinoyl]]-3-Oxo-Butanoic Acid (Metal ion binding)		(M5947)HALLMARK IL2 STAT5 SIGNALING; (M5905)HALLMARK ADIPOGENESIS; (M5934)HALLMARK XENOBIOTIC METABOLISM	0.0	0.0	0.0	0.0	0.0	0.0	0.0	0.0	0.0	0.0	0.0	0.0	0.0	0.0	0.0	0.0	0.0	0.0	0.0	0.0
FAM114A1	92689	symbol	H. sapiens	92689	H. sapiens	FAM114A1	family with sequence similarity 114 member A1				Cytosol;Golgi apparatus;Nucleus(Enhanced)				0.0	0.0	0.0	0.0	0.0	0.0	0.0	0.0	0.0	0.0	0.0	0.0	0.0	0.0	0.0	0.0	0.0	0.0	0.0	0.0
FAM129A	116496	gene_synonym	H. sapiens	116496	H. sapiens	NIBAN1	niban apoptosis regulator 1	GO:0045727 positive regulation of translation;GO:0001933 negative regulation of protein phosphorylation;GO:0034250 positive regulation of cellular amide metabolic process			Cytosol(Supported)Plasma membrane(Approved)			(M5892)HALLMARK CHOLESTEROL HOMEOSTASIS; (M5924)HALLMARK MTORC1 SIGNALING	0.0	0.0	0.0	0.0	0.0	0.0	0.0	0.0	0.0	0.0	0.0	0.0	0.0	0.0	0.0	0.0	0.0	0.0	0.0	0.0
FAM167B	84734	symbol	H. sapiens	84734	H. sapiens	FAM167B	family with sequence similarity 167 member B				Actin filaments(Approved)				0.0	0.0	0.0	0.0	0.0	0.0	0.0	0.0	0.0	0.0	0.0	0.0	0.0	0.0	0.0	0.0	0.0	0.0	0.0	0.0
FAM177B	400823	symbol	H. sapiens	400823	H. sapiens	FAM177B	family with sequence similarity 177 member B								0.0	0.0	0.0	0.0	0.0	0.0	0.0	0.0	0.0	0.0	0.0	0.0	0.0	0.0	0.0	0.0	0.0	0.0	0.0	0.0
FAM193B	54540	symbol	H. sapiens	54540	H. sapiens	FAM193B	family with sequence similarity 193 member B				Nucleus(Enhanced)Nucleoli(Approved)				0.0	0.0	0.0	0.0	0.0	0.0	0.0	0.0	0.0	0.0	0.0	0.0	0.0	0.0	0.0	0.0	0.0	0.0	0.0	0.0
FAM20A	54757	symbol	H. sapiens	54757	H. sapiens	FAM20A	FAM20A golgi associated secretory pathway pseudokinase	GO:0070166 enamel mineralization;GO:0044691 tooth eruption;GO:0097186 amelogenesis					(M3468)NABA ECM REGULATORS; (M5885)NABA MATRISOME ASSOCIATED; (M5889)NABA MATRISOME		0.0	0.0	0.0	0.0	0.0	0.0	0.0	1.0	0.0	0.0	0.0	0.0	0.0	0.0	0.0	1.0	0.0	0.0	0.0	0.0
FAM20C	56975	symbol	H. sapiens	56975	H. sapiens	FAM20C	FAM20C golgi associated secretory pathway kinase	GO:0036179 osteoclast maturation;GO:0071895 odontoblast differentiation;GO:0036035 osteoclast development		Enzymes/ENZYME proteins/Transferases	Cytosol;Golgi apparatus;Nucleoplasm(Approved)		(M3468)NABA ECM REGULATORS; (M5885)NABA MATRISOME ASSOCIATED; (M5889)NABA MATRISOME		0.0	0.0	1.0	0.0	0.0	0.0	0.0	0.0	0.0	0.0	0.0	0.0	0.0	0.0	0.0	1.0	0.0	0.0	1.0	0.0
FAM26F	441168	gene_synonym	H. sapiens	441168	H. sapiens	CALHM6	calcium homeostasis modulator family member 6	GO:0098655 cation transmembrane transport;GO:0034220 ion transmembrane transport;GO:0006812 cation transport		Transporters/Transporter channels and pores					0.0	0.0	0.0	0.0	0.0	0.0	0.0	0.0	0.0	0.0	0.0	0.0	0.0	0.0	0.0	0.0	0.0	0.0	0.0	0.0
FAM46A	55603	gene_synonym	H. sapiens	55603	H. sapiens	TENT5A	terminal nucleotidyltransferase 5A	GO:0009617 response to bacterium;GO:0051707 response to other organism;GO:0043207 response to external biotic stimulus			Cytosol;Nucleoplasm(Approved)			(M5911)HALLMARK INTERFERON ALPHA RESPONSE	0.0	0.0	0.0	0.0	0.0	0.0	0.0	1.0	0.0	0.0	0.0	0.0	0.0	0.0	0.0	0.0	0.0	0.0	0.0	0.0
FAM65C	140876	gene_synonym	H. sapiens	140876	H. sapiens	RIPOR3	RIPOR family member 3				Nucleoplasm(Approved)				0.0	0.0	0.0	0.0	0.0	0.0	0.0	0.0	0.0	0.0	0.0	0.0	0.0	0.0	0.0	0.0	0.0	0.0	0.0	0.0
FAM71F2	346653	symbol	H. sapiens	346653	H. sapiens	FAM71F2	family with sequence similarity 71 member F2				Nucleoplasm(Approved)				0.0	0.0	0.0	0.0	0.0	0.0	0.0	0.0	0.0	0.0	0.0	0.0	0.0	0.0	0.0	0.0	0.0	0.0	0.0	0.0
FAM78B	149297	symbol	H. sapiens	149297	H. sapiens	FAM78B	family with sequence similarity 78 member B				Golgi apparatus;Vesicles(Approved)				0.0	0.0	0.0	0.0	0.0	0.0	0.0	0.0	0.0	0.0	0.0	0.0	0.0	0.0	0.0	0.0	0.0	0.0	0.0	0.0
FAM83G	644815	symbol	H. sapiens	644815	H. sapiens	FAM83G	family with sequence similarity 83 member G	GO:0030509 BMP signaling pathway;GO:0071773 cellular response to BMP stimulus;GO:0071772 response to BMP			Cytosol(Supported)				0.0	0.0	0.0	0.0	0.0	0.0	0.0	0.0	0.0	0.0	0.0	0.0	0.0	0.0	0.0	0.0	0.0	0.0	0.0	0.0
FAM83H	286077	symbol	H. sapiens	286077	H. sapiens	FAM83H	family with sequence similarity 83 member H	GO:0045104 intermediate filament cytoskeleton organization;GO:0044380 protein localization to cytoskeleton;GO:0045103 intermediate filament-based process			Cytosol(Approved)				0.0	0.0	0.0	0.0	1.0	0.0	0.0	0.0	0.0	0.0	0.0	0.0	0.0	0.0	0.0	0.0	0.0	0.0	0.0	0.0
FAM92B	339145	gene_synonym	H. sapiens	339145	H. sapiens	CIBAR2	CBY1 interacting BAR domain containing 2	GO:0030030 cell projection organization;GO:0016043 cellular component organization;GO:0071840 cellular component organization or biogenesis							0.0	0.0	0.0	0.0	0.0	0.0	0.0	0.0	0.0	0.0	0.0	0.0	0.0	0.0	0.0	0.0	0.0	0.0	0.0	0.0
FAP	2191	symbol	H. sapiens	2191	H. sapiens	FAP	fibroblast activation protein alpha	GO:0051917 regulation of fibrinolysis;GO:0010716 negative regulation of extracellular matrix disassembly;GO:1902362 melanocyte apoptotic process		Enzymes/{ENZYME proteins/Hydrolases,Peptidases/Serine-type peptidases}				(M5930)HALLMARK EPITHELIAL MESENCHYMAL TRANSITION	0.0	0.0	0.0	0.0	0.0	0.0	0.0	0.0	0.0	0.0	1.0	1.0	0.0	0.0	0.0	0.0	0.0	0.0	0.0	1.0
FAS	355	symbol	H. sapiens	355	H. sapiens	FAS	Fas cell surface death receptor	GO:2001269 positive regulation of cysteine-type endopeptidase activity involved in apoptotic signaling pathway;GO:0097527 necroptotic signaling pathway;GO:0071455 cellular response to hyperoxia		CD markers	Plasma membrane(Supported)Cytosol(Approved)		(M5060)SA FAS SIGNALING; (M7997)SA CASPASE CASCADE; (M197)PID HIV NEF PATHWAY	(M5897)HALLMARK IL6 JAK STAT3 SIGNALING; (M5902)HALLMARK APOPTOSIS; (M5913)HALLMARK INTERFERON GAMMA RESPONSE	0.0	1.0	0.0	0.0	0.0	0.0	0.0	0.0	0.0	0.0	0.0	0.0	1.0	0.0	0.0	0.0	0.0	1.0	0.0	0.0
FASLG	356	symbol	H. sapiens	356	H. sapiens	FASLG	Fas ligand	GO:0048388 endosomal lumen acidification;GO:1903514 release of sequestered calcium ion into cytosol by endoplasmic reticulum;GO:0030644 cellular chloride ion homeostasis		CD markers;RAS pathway related proteins			(M5060)SA FAS SIGNALING; (M7997)SA CASPASE CASCADE; (M235)PID TCR CALCIUM PATHWAY	(M5923)HALLMARK PI3K AKT MTOR SIGNALING; (M5902)HALLMARK APOPTOSIS; (M5950)HALLMARK ALLOGRAFT REJECTION	0.0	1.0	0.0	0.0	0.0	0.0	0.0	1.0	0.0	0.0	0.0	0.0	1.0	0.0	0.0	1.0	0.0	0.0	0.0	0.0
FBLN5	10516	symbol	H. sapiens	10516	H. sapiens	FBLN5	fibulin 5	GO:0098867 intramembranous bone growth;GO:2000121 regulation of removal of superoxide radicals;GO:0019430 removal of superoxide radicals			Plasma membrane(Supported)		(M3008)NABA ECM GLYCOPROTEINS; (M5884)NABA CORE MATRISOME; (M5889)NABA MATRISOME	(M5942)HALLMARK UV RESPONSE DN; (M5930)HALLMARK EPITHELIAL MESENCHYMAL TRANSITION	0.0	0.0	0.0	0.0	0.0	0.0	0.0	0.0	0.0	0.0	0.0	1.0	0.0	0.0	0.0	0.0	0.0	0.0	0.0	0.0
FBN1	2200	symbol	H. sapiens	2200	H. sapiens	FBN1	fibrillin 1	GO:2001205 negative regulation of osteoclast development;GO:0035583 sequestering of TGFbeta in extracellular matrix;GO:0035582 sequestering of BMP in extracellular matrix			Cytosol(Approved)		(M212)PID INTEGRIN5 PATHWAY; (M53)PID INTEGRIN3 PATHWAY; (M18)PID INTEGRIN1 PATHWAY	(M5946)HALLMARK COAGULATION; (M5915)HALLMARK APICAL JUNCTION; (M5930)HALLMARK EPITHELIAL MESENCHYMAL TRANSITION	0.0	0.0	1.0	0.0	0.0	0.0	0.0	0.0	0.0	0.0	1.0	1.0	0.0	0.0	0.0	0.0	0.0	0.0	1.0	0.0
FBP1	2203	symbol	H. sapiens	2203	H. sapiens	FBP1	fructose-bisphosphatase 1	GO:0045820 negative regulation of glycolytic process;GO:2001170 negative regulation of ATP biosynthetic process;GO:0006110 regulation of glycolytic process		Enzymes/ENZYME proteins/Hydrolases	Mitochondria(Uncertain)	Adenosine monophosphate (Monosaccharide binding);2,5-Anhydroglucitol-1,6-Biphosphate (Monosaccharide binding);{4-[3-(6,7-Diethoxy-Quinazolin-4-Ylamino)-Phenyl]-Thiazol-2-Yl}-Methanol (Monosaccharide binding);Mdl-29951 (Monosaccharide binding);Fructose-6-Phosphate (Monosaccharide binding);MB07803 (Monosaccharide binding);N-[7-(3-AMINOPHENYL)-5-METHOXY-1,3-BENZOXAZOL-2-YL]-2,5-DICHLOROBENZENESULFON…		(M5891)HALLMARK HYPOXIA; (M5934)HALLMARK XENOBIOTIC METABOLISM	0.0	0.0	0.0	0.0	0.0	0.0	0.0	0.0	0.0	0.0	0.0	0.0	0.0	0.0	0.0	0.0	0.0	0.0	0.0	0.0
FBXL8	55336	symbol	H. sapiens	55336	H. sapiens	FBXL8	F-box and leucine rich repeat protein 8	GO:0031146 SCF-dependent proteasomal ubiquitin-dependent protein catabolic process;GO:0000086 G2/M transition of mitotic cell cycle;GO:0043161 proteasome-mediated ubiquitin-dependent protein catabolic process			Golgi apparatus(Approved)				0.0	0.0	0.0	0.0	0.0	0.0	0.0	0.0	0.0	0.0	0.0	0.0	0.0	0.0	1.0	0.0	0.0	0.0	0.0	0.0
FBXO32	114907	symbol	H. sapiens	114907	H. sapiens	FBXO32	F-box protein 32	GO:0014894 response to denervation involved in regulation of muscle adaptation;GO:0014877 response to muscle inactivity involved in regulation of muscle adaptation;GO:0071549 cellular response to dexamethasone stimulus			Cytosol;Nucleoplasm(Supported)		(M136)PID FOXO PATHWAY		0.0	0.0	0.0	0.0	0.0	0.0	0.0	1.0	0.0	0.0	0.0	0.0	0.0	0.0	1.0	0.0	0.0	0.0	0.0	0.0
FCAR	2204	symbol	H. sapiens	2204	H. sapiens	FCAR	Fc fragment of IgA receptor	GO:0043312 neutrophil degranulation;GO:0002283 neutrophil activation involved in immune response;GO:0042119 neutrophil activation		CD markers	Plasma membrane(Supported)				1.0	0.0	0.0	0.0	0.0	0.0	0.0	0.0	0.0	0.0	0.0	0.0	1.0	0.0	0.0	0.0	0.0	0.0	0.0	0.0
FCER1G	2207	symbol	H. sapiens	2207	H. sapiens	FCER1G	Fc fragment of IgE receptor Ig	GO:0001798 positive regulation of type IIa hypersensitivity;GO:0001805 positive regulation of type III hypersensitivity;GO:0001812 positive regulation of type I hypersensitivity				Benzylpenicilloyl Polylysine (Igg binding)	(M7)PID FCER1 PATHWAY	(M5921)HALLMARK COMPLEMENT; (M5953)HALLMARK KRAS SIGNALING UP	1.0	1.0	1.0	1.0	1.0	1.0	1.0	1.0	1.0	1.0	1.0	0.0	1.0	1.0	0.0	0.0	0.0	0.0	1.0	1.0
FCGBP	8857	symbol	H. sapiens	8857	H. sapiens	FCGBP	Fc fragment of IgG binding protein				Cytokinetic bridge;Golgi apparatus;Plasma membrane(Approved)				0.0	0.0	0.0	0.0	0.0	0.0	0.0	0.0	0.0	0.0	0.0	0.0	0.0	0.0	0.0	0.0	0.0	0.0	0.0	0.0
FCGR1A	2209	symbol	H. sapiens	2209	H. sapiens	FCGR1A	Fc fragment of IgG receptor Ia	GO:0002479 antigen processing and presentation of exogenous peptide antigen via MHC class I, TAP-dependent;GO:0038096 Fc-gamma receptor signaling pathway involved in phagocytosis;GO:0061098 positive regulation of protein tyrosine kinase activity		CD markers		Cetuximab (Receptor signaling protein activity);Etanercept (Receptor signaling protein activity);Immune Globulin Human (Receptor signaling protein activity);Adalimumab (Receptor signaling protein activity);Abciximab (Receptor signaling protein activity);Gemtuzumab ozogamicin (Receptor signaling protein activity);Trastuzumab (Receptor signaling protein activity);Rituximab (Receptor signaling prote…		(M5913)HALLMARK INTERFERON GAMMA RESPONSE	0.0	1.0	0.0	0.0	0.0	0.0	1.0	0.0	0.0	0.0	0.0	0.0	1.0	0.0	1.0	0.0	1.0	0.0	0.0	0.0
FCGR1B	2210	symbol	H. sapiens	2210	H. sapiens	FCGR1B	Fc fragment of IgG receptor Ib	GO:0002479 antigen processing and presentation of exogenous peptide antigen via MHC class I, TAP-dependent;GO:0042590 antigen processing and presentation of exogenous peptide antigen via MHC class I;GO:0060333 interferon-gamma-mediated signaling pathway				Immune Globulin Human (Immunoglobulin receptor activity)			0.0	1.0	0.0	0.0	0.0	1.0	1.0	0.0	0.0	0.0	0.0	0.0	1.0	0.0	1.0	0.0	0.0	0.0	0.0	0.0
FCGR2A	2212	symbol	H. sapiens	2212	H. sapiens	FCGR2A	Fc fragment of IgG receptor IIa	GO:0038096 Fc-gamma receptor signaling pathway involved in phagocytosis;GO:0002431 Fc receptor mediated stimulatory signaling pathway;GO:0038094 Fc-gamma receptor signaling pathway		CD markers		Cetuximab;Etanercept;Immune Globulin Human;Adalimumab;Abciximab;Gemtuzumab ozogamicin;Trastuzumab;Rituximab;Basiliximab;Muromonab;Ibritumomab tiuxetan;Tositumomab;Alemtuzumab;Alefacept;Efalizumab;Natalizumab;Palivizumab;Daclizumab;Bevacizumab	(M169)PID INTEGRIN2 PATHWAY; (M50)PID PTP1B PATHWAY		1.0	0.0	0.0	0.0	0.0	0.0	1.0	0.0	0.0	0.0	0.0	0.0	1.0	0.0	0.0	0.0	1.0	0.0	0.0	0.0
FCGR2B	2213	symbol	H. sapiens	2213	H. sapiens	FCGR2B	Fc fragment of IgG receptor IIb	GO:0001814 negative regulation of antibody-dependent cellular cytotoxicity;GO:0001797 negative regulation of type IIa hypersensitivity;GO:0002893 negative regulation of type II hypersensitivity		CD markers		Cetuximab;Etanercept;Immune Globulin Human;Adalimumab;Abciximab;Gemtuzumab ozogamicin;Trastuzumab;Rituximab;Basiliximab;Muromonab;Ibritumomab tiuxetan;Tositumomab;Alemtuzumab;Alefacept;Efalizumab;Anti-thymocyte Globulin (Rabbit);Natalizumab;Palivizumab;Daclizumab;Bevacizumab	(M7)PID FCER1 PATHWAY; (M10)PID BCR 5PATHWAY	(M5950)HALLMARK ALLOGRAFT REJECTION	1.0	0.0	1.0	1.0	0.0	1.0	1.0	1.0	1.0	1.0	1.0	0.0	1.0	1.0	1.0	0.0	1.0	0.0	1.0	0.0
FCGR3A	2214	symbol	H. sapiens	2214	H. sapiens	FCGR3A	Fc fragment of IgG receptor IIIa	GO:0038096 Fc-gamma receptor signaling pathway involved in phagocytosis;GO:0002431 Fc receptor mediated stimulatory signaling pathway;GO:0038094 Fc-gamma receptor signaling pathway		CD markers		Cetuximab;Etanercept;Immune Globulin Human;Adalimumab;Abciximab;Gemtuzumab ozogamicin;Trastuzumab;Rituximab;Basiliximab;Muromonab;Ibritumomab tiuxetan;Tositumomab;Alemtuzumab;Alefacept;Efalizumab;Natalizumab;Palivizumab;Daclizumab;Bevacizumab	(M11736)SA MMP CYTOKINE CONNECTION		0.0	0.0	0.0	0.0	0.0	0.0	1.0	0.0	0.0	0.0	0.0	0.0	1.0	0.0	1.0	0.0	1.0	0.0	0.0	0.0
FCGR3B	2215	symbol	H. sapiens	2215	H. sapiens	FCGR3B	Fc fragment of IgG receptor IIIb	GO:0043312 neutrophil degranulation;GO:0002283 neutrophil activation involved in immune response;GO:0042119 neutrophil activation		CD markers		Cetuximab;Etanercept;Immune Globulin Human;Adalimumab;Abciximab;Gemtuzumab ozogamicin;Trastuzumab;Rituximab;Basiliximab;Muromonab;Ibritumomab tiuxetan;Tositumomab;Alemtuzumab;Alefacept;Efalizumab;Natalizumab;Palivizumab;Daclizumab;Bevacizumab			1.0	0.0	0.0	0.0	0.0	0.0	0.0	0.0	0.0	0.0	0.0	0.0	1.0	0.0	0.0	0.0	1.0	0.0	0.0	0.0
FCGRT	2217	symbol	H. sapiens	2217	H. sapiens	FCGRT	Fc fragment of IgG receptor and transporter	GO:0002416 IgG immunoglobulin transcytosis in epithelial cells mediated by FcRn immunoglobulin receptor;GO:0002486 antigen processing and presentation of endogenous peptide antigen via MHC class I via ER pathway, TAP-independent;GO:0002414 immunoglobulin transcytosis in epithelial cells							0.0	0.0	0.0	0.0	0.0	1.0	0.0	0.0	0.0	0.0	0.0	0.0	1.0	0.0	0.0	0.0	0.0	0.0	0.0	0.0
FCHSD1	89848	symbol	H. sapiens	89848	H. sapiens	FCHSD1	FCH and double SH3 domains 1	GO:0044803 multi-organism membrane organization;GO:0030838 positive regulation of actin filament polymerization;GO:0007274 neuromuscular synaptic transmission			Cytosol;Nucleoplasm(Approved)				0.0	0.0	0.0	0.0	0.0	0.0	0.0	0.0	0.0	0.0	0.0	0.0	0.0	0.0	0.0	0.0	0.0	0.0	0.0	0.0
FCN1	2219	symbol	H. sapiens	2219	H. sapiens	FCN1	ficolin 1	GO:0002752 cell surface pattern recognition receptor signaling pathway;GO:0046597 negative regulation of viral entry into host cell;GO:2000484 positive regulation of interleukin-8 secretion					(M5880)NABA ECM AFFILIATED; (M5885)NABA MATRISOME ASSOCIATED; (M5889)NABA MATRISOME	(M5921)HALLMARK COMPLEMENT	1.0	0.0	0.0	1.0	0.0	0.0	1.0	0.0	1.0	0.0	0.0	0.0	0.0	0.0	0.0	1.0	0.0	0.0	0.0	0.0
FCRL6	343413	symbol	H. sapiens	343413	H. sapiens	FCRL6	Fc receptor like 6								0.0	0.0	0.0	0.0	0.0	0.0	0.0	0.0	0.0	0.0	0.0	0.0	0.0	0.0	0.0	0.0	0.0	0.0	0.0	0.0
FER1L5	90342	symbol	H. sapiens	90342	H. sapiens	FER1L5	fer-1 like family member 5	GO:0007520 myoblast fusion;GO:0000768 syncytium formation by plasma membrane fusion;GO:0014902 myotube differentiation							0.0	0.0	0.0	0.0	0.0	0.0	0.0	0.0	0.0	0.0	0.0	0.0	0.0	0.0	0.0	0.0	0.0	0.0	0.0	0.0
FERMT3	83706	symbol	H. sapiens	83706	H. sapiens	FERMT3	fermitin family member 3	GO:0033632 regulation of cell-cell adhesion mediated by integrin;GO:0033631 cell-cell adhesion mediated by integrin;GO:0070527 platelet aggregation			Vesicles(Approved)				1.0	0.0	1.0	0.0	1.0	0.0	0.0	0.0	0.0	0.0	0.0	0.0	0.0	0.0	0.0	0.0	0.0	0.0	0.0	1.0
FES	2242	symbol	H. sapiens	2242	H. sapiens	FES	FES proto-oncogene, tyrosine kinase	GO:0045657 positive regulation of monocyte differentiation;GO:0045655 regulation of monocyte differentiation;GO:0043304 regulation of mast cell degranulation	Tyr protein kinase family	Enzymes/{ENZYME proteins/Transferases,Kinases/Tyr protein kinases}	Cytosol;Nucleus;Vesicles(Approved)		(M92)PID ANGIOPOIETIN RECEPTOR PATHWAY; (M28)PID IL4 2PATHWAY; (M237)PID VEGFR1 2 PATHWAY	(M5938)HALLMARK REACTIVE OXIGEN SPECIES PATHWAY	1.0	0.0	1.0	1.0	1.0	1.0	0.0	1.0	0.0	0.0	0.0	0.0	0.0	0.0	0.0	0.0	0.0	0.0	1.0	0.0
FFAR2	2867	symbol	H. sapiens	2867	H. sapiens	FFAR2	free fatty acid receptor 2	GO:0002879 positive regulation of acute inflammatory response to non-antigenic stimulus;GO:0002752 cell surface pattern recognition receptor signaling pathway;GO:2000484 positive regulation of interleukin-8 secretion		G-protein coupled receptors/GPCRs excl olfactory receptors				(M5932)HALLMARK INFLAMMATORY RESPONSE	0.0	0.0	0.0	1.0	1.0	1.0	1.0	1.0	1.0	0.0	0.0	0.0	0.0	1.0	0.0	0.0	0.0	0.0	0.0	0.0
FFAR4	338557	symbol	H. sapiens	338557	H. sapiens	FFAR4	free fatty acid receptor 4	GO:0090275 negative regulation of somatostatin secretion;GO:0070094 positive regulation of glucagon secretion;GO:0036321 ghrelin secretion		G-protein coupled receptors/GPCRs excl olfactory receptors	Plasma membrane(Uncertain)	TNX-355 (Taste receptor activity);PRO-542 (Taste receptor activity)			0.0	0.0	0.0	1.0	0.0	0.0	0.0	0.0	0.0	0.0	0.0	0.0	0.0	1.0	0.0	0.0	0.0	0.0	0.0	0.0
FGD2	221472	symbol	H. sapiens	221472	H. sapiens	FGD2	FYVE, RhoGEF and PH domain containing 2	GO:0043507 positive regulation of JUN kinase activity;GO:0043506 regulation of JUN kinase activity;GO:0046330 positive regulation of JNK cascade							0.0	0.0	0.0	0.0	0.0	0.0	0.0	0.0	0.0	0.0	0.0	0.0	0.0	0.0	0.0	0.0	0.0	0.0	0.0	0.0
FGL2	10875	symbol	H. sapiens	10875	H. sapiens	FGL2	fibrinogen like 2	GO:0043381 negative regulation of memory T cell differentiation;GO:0002617 negative regulation of macrophage antigen processing and presentation;GO:0043380 regulation of memory T cell differentiation					(M3008)NABA ECM GLYCOPROTEINS; (M5884)NABA CORE MATRISOME; (M5889)NABA MATRISOME	(M5947)HALLMARK IL2 STAT5 SIGNALING; (M5913)HALLMARK INTERFERON GAMMA RESPONSE; (M5924)HALLMARK MTORC1 SIGNALING	1.0	0.0	1.0	0.0	0.0	1.0	0.0	0.0	0.0	1.0	1.0	1.0	1.0	0.0	0.0	0.0	0.0	0.0	1.0	0.0
FGR	2268	symbol	H. sapiens	2268	H. sapiens	FGR	FGR proto-oncogene, Src family tyrosine kinase	GO:0043306 positive regulation of mast cell degranulation;GO:0033008 positive regulation of mast cell activation involved in immune response;GO:0032815 negative regulation of natural killer cell activation	Tyr protein kinase family	Enzymes/{ENZYME proteins/Transferases,Kinases/Tyr protein kinases}	Aggresome;Plasma membrane(Approved)		(M33)PID GLYPICAN 1PATHWAY; (M252)PID IL8 CXCR1 PATHWAY; (M257)PID EPHRINB REV PATHWAY	(M5950)HALLMARK ALLOGRAFT REJECTION	1.0	0.0	1.0	1.0	1.0	1.0	1.0	1.0	1.0	0.0	1.0	0.0	1.0	0.0	0.0	0.0	0.0	0.0	0.0	1.0
FHAD1	114827	symbol	H. sapiens	114827	H. sapiens	FHAD1	forkhead associated phosphopeptide binding domain 1								0.0	0.0	0.0	0.0	0.0	0.0	0.0	0.0	0.0	0.0	0.0	0.0	0.0	0.0	0.0	0.0	0.0	0.0	0.0	0.0
FHOD1	29109	symbol	H. sapiens	29109	H. sapiens	FHOD1	formin homology 2 domain containing 1	GO:0051496 positive regulation of stress fiber assembly;GO:0051492 regulation of stress fiber assembly;GO:0051660 establishment of centrosome localization			Cytosol(Supported)				0.0	0.0	0.0	0.0	0.0	0.0	0.0	0.0	0.0	0.0	0.0	0.0	0.0	0.0	0.0	0.0	0.0	0.0	0.0	0.0
FILIP1L	11259	symbol	H. sapiens	11259	H. sapiens	FILIP1L	filamin A interacting protein 1 like	GO:0008150 biological_process			Plasma membrane(Approved)				0.0	0.0	0.0	0.0	0.0	0.0	0.0	0.0	0.0	0.0	0.0	0.0	0.0	0.0	0.0	0.0	0.0	0.0	0.0	0.0
FKBP11	51303	symbol	H. sapiens	51303	H. sapiens	FKBP11	FKBP prolyl isomerase 11	GO:0000413 protein peptidyl-prolyl isomerization;GO:0018208 peptidyl-proline modification;GO:0018193 peptidyl-amino acid modification		Enzymes/ENZYME proteins/Isomerase	Centrosome(Approved)				0.0	0.0	0.0	0.0	0.0	0.0	0.0	0.0	0.0	0.0	0.0	0.0	0.0	0.0	0.0	0.0	0.0	0.0	0.0	0.0
FLI1	2313	symbol	H. sapiens	2313	H. sapiens	FLI1	Fli-1 proto-oncogene, ETS transcription factor	GO:0035855 megakaryocyte development;GO:0098751 bone cell development;GO:0030219 megakaryocyte differentiation		Transcription factors/Helix-turn-helix domains	Nuclear bodies;Nucleus(Supported)				0.0	0.0	0.0	0.0	0.0	0.0	0.0	0.0	0.0	0.0	0.0	0.0	0.0	0.0	0.0	0.0	0.0	0.0	1.0	1.0
FLNA	2316	symbol	H. sapiens	2316	H. sapiens	FLNA	filamin A	GO:1905000 regulation of membrane repolarization during atrial cardiac muscle cell action potential;GO:0098914 membrane repolarization during atrial cardiac muscle cell action potential;GO:0098910 regulation of atrial cardiac muscle cell action potential		Transporters/Accessory Factors Involved in Transport	Actin filaments;Cytosol;Plasma membrane(Enhanced)		(M23)PID WNT NONCANONICAL PATHWAY; (M16801)SIG REGULATION OF THE ACTIN CYTOSKELETON BY RHO GTPASES; (M34)PID TCR PATHWAY	(M5893)HALLMARK MITOTIC SPINDLE; (M5930)HALLMARK EPITHELIAL MESENCHYMAL TRANSITION; (M5950)HALLMARK ALLOGRAFT REJECTION	1.0	0.0	1.0	1.0	1.0	0.0	0.0	0.0	0.0	0.0	0.0	0.0	0.0	0.0	0.0	0.0	0.0	0.0	0.0	1.0
FLVCR2	55640	symbol	H. sapiens	55640	H. sapiens	FLVCR2	FLVCR heme transporter 2	GO:0097037 heme export;GO:0015886 heme transport;GO:1901678 iron coordination entity transport		Transporters/Electrochemical Potential-driven transporters					0.0	0.0	0.0	0.0	0.0	0.0	0.0	0.0	0.0	0.0	0.0	0.0	0.0	0.0	0.0	0.0	0.0	0.0	0.0	0.0
FMN1	342184	symbol	H. sapiens	342184	H. sapiens	FMN1	formin 1	GO:0072092 ureteric bud invasion;GO:0072093 metanephric renal vesicle formation;GO:0060677 ureteric bud elongation			Cytosol;Nucleoplasm(Supported)		(M184)PID ECADHERIN KERATINOCYTE PATHWAY		0.0	0.0	1.0	0.0	0.0	0.0	0.0	0.0	0.0	0.0	0.0	0.0	0.0	0.0	0.0	0.0	0.0	0.0	0.0	0.0
FMNL1	752	symbol	H. sapiens	752	H. sapiens	FMNL1	formin like 1	GO:0051014 actin filament severing;GO:0006929 substrate-dependent cell migration;GO:0030866 cortical actin cytoskeleton organization			Cytosol(Approved)				0.0	0.0	0.0	0.0	0.0	0.0	0.0	0.0	0.0	0.0	0.0	0.0	0.0	0.0	0.0	0.0	0.0	0.0	0.0	0.0
FMOD	2331	symbol	H. sapiens	2331	H. sapiens	FMOD	fibromodulin	GO:0042340 keratan sulfate catabolic process;GO:0007181 transforming growth factor beta receptor complex assembly;GO:0018146 keratan sulfate biosynthetic process					(M5882)NABA PROTEOGLYCANS; (M5884)NABA CORE MATRISOME; (M5889)NABA MATRISOME	(M5930)HALLMARK EPITHELIAL MESENCHYMAL TRANSITION	0.0	0.0	0.0	0.0	0.0	0.0	0.0	0.0	0.0	0.0	0.0	1.0	0.0	0.0	0.0	0.0	0.0	0.0	0.0	0.0
FN1	2335	symbol	H. sapiens	2335	H. sapiens	FN1	fibronectin 1	GO:2001202 negative regulation of transforming growth factor-beta secretion;GO:1904237 positive regulation of substrate-dependent cell migration, cell attachment to substrate;GO:2001201 regulation of transforming growth factor-beta secretion				Ocriplasmin (Protease binding)	(M212)PID INTEGRIN5 PATHWAY; (M118)PID INTEGRIN A9B1 PATHWAY; (M274)PID LYMPH ANGIOGENESIS PATHWAY	(M5946)HALLMARK COAGULATION; (M5921)HALLMARK COMPLEMENT; (M5930)HALLMARK EPITHELIAL MESENCHYMAL TRANSITION	1.0	1.0	1.0	1.0	1.0	0.0	0.0	0.0	0.0	0.0	0.0	1.0	0.0	0.0	0.0	0.0	0.0	0.0	0.0	1.0
FNDC3B	64778	symbol	H. sapiens	64778	H. sapiens	FNDC3B	fibronectin type III domain containing 3B				Endoplasmic reticulum(Approved)				0.0	0.0	0.0	0.0	0.0	0.0	0.0	0.0	0.0	0.0	0.0	0.0	0.0	0.0	0.0	0.0	0.0	0.0	0.0	0.0
FOSL1	8061	symbol	H. sapiens	8061	H. sapiens	FOSL1	FOS like 1, AP-1 transcription factor subunit	GO:0007296 vitellogenesis;GO:0051412 response to corticosterone;GO:0060674 placenta blood vessel development		Transcription factors/Basic domains	Nucleoplasm(Enhanced)		(M235)PID TCR CALCIUM PATHWAY; (M65)PID FRA PATHWAY; (M60)PID NFAT TFPATHWAY	(M5890)HALLMARK TNFA SIGNALING VIA NFKB	0.0	0.0	0.0	0.0	1.0	0.0	0.0	0.0	0.0	0.0	1.0	0.0	1.0	0.0	0.0	0.0	1.0	1.0	0.0	0.0
FOSL2	2355	symbol	H. sapiens	2355	H. sapiens	FOSL2	FOS like 2, AP-1 transcription factor subunit	GO:0003334 keratinocyte development;GO:0048146 positive regulation of fibroblast proliferation;GO:0030216 keratinocyte differentiation		Transcription factors/Basic domains	Nucleus(Enhanced)		(M65)PID FRA PATHWAY; (M236)PID DELTA NP63 PATHWAY; (M167)PID AP1 PATHWAY	(M5891)HALLMARK HYPOXIA; (M5890)HALLMARK TNFA SIGNALING VIA NFKB	0.0	0.0	0.0	0.0	0.0	0.0	0.0	0.0	0.0	0.0	0.0	0.0	0.0	0.0	0.0	0.0	1.0	0.0	0.0	0.0
FOXP3	50943	symbol	H. sapiens	50943	H. sapiens	FOXP3	forkhead box P3	GO:0048294 negative regulation of isotype switching to IgE isotypes;GO:2000320 negative regulation of T-helper 17 cell differentiation;GO:0002362 CD4-positive, CD25-positive, alpha-beta regulatory T cell lineage commitment		Transcription factors/Helix-turn-helix domains	Nucleoplasm(Supported)		(M234)PID IL2 STAT5 PATHWAY; (M60)PID NFAT TFPATHWAY		1.0	0.0	1.0	1.0	0.0	1.0	1.0	0.0	0.0	1.0	1.0	0.0	1.0	1.0	0.0	0.0	0.0	0.0	1.0	0.0
FPR2	2358	symbol	H. sapiens	2358	H. sapiens	FPR2	formyl peptide receptor 2	GO:0061903 positive regulation of 1-phosphatidylinositol-3-kinase activity;GO:0061901 regulation of 1-phosphatidylinositol-3-kinase activity;GO:0010513 positive regulation of phosphatidylinositol biosynthetic process		G-protein coupled receptors/{Chemokines and chemotactic factors receptors,GPCRs excl olfactory receptors}			(M174)PID UPA UPAR PATHWAY		1.0	0.0	0.0	0.0	1.0	0.0	1.0	1.0	1.0	0.0	0.0	0.0	1.0	1.0	0.0	0.0	0.0	0.0	0.0	0.0
FPR3	2359	symbol	H. sapiens	2359	H. sapiens	FPR3	formyl peptide receptor 3	GO:0002430 complement receptor mediated signaling pathway;GO:0007204 positive regulation of cytosolic calcium ion concentration;GO:0051480 regulation of cytosolic calcium ion concentration		G-protein coupled receptors/{Chemokines and chemotactic factors receptors,GPCRs excl olfactory receptors}			(M174)PID UPA UPAR PATHWAY		0.0	0.0	0.0	0.0	1.0	0.0	1.0	0.0	0.0	0.0	0.0	0.0	1.0	0.0	0.0	0.0	0.0	0.0	0.0	0.0
FSCN2	25794	symbol	H. sapiens	25794	H. sapiens	FSCN2	fascin actin-bundling protein 2, retinal	GO:0042462 eye photoreceptor cell development;GO:0042461 photoreceptor cell development;GO:0001754 eye photoreceptor cell differentiation					(M16801)SIG REGULATION OF THE ACTIN CYTOSKELETON BY RHO GTPASES		0.0	0.0	0.0	0.0	0.0	0.0	0.0	0.0	0.0	0.0	0.0	0.0	0.0	0.0	0.0	0.0	0.0	0.0	0.0	0.0
FSTL3	10272	symbol	H. sapiens	10272	H. sapiens	FSTL3	follistatin like 3	GO:0045671 negative regulation of osteoclast differentiation;GO:0032926 negative regulation of activin receptor signaling pathway;GO:0002762 negative regulation of myeloid leukocyte differentiation			Nucleoplasm(Approved)		(M5883)NABA SECRETED FACTORS; (M5885)NABA MATRISOME ASSOCIATED; (M5889)NABA MATRISOME	(M5930)HALLMARK EPITHELIAL MESENCHYMAL TRANSITION	0.0	0.0	1.0	0.0	0.0	0.0	0.0	0.0	0.0	0.0	1.0	0.0	0.0	0.0	0.0	1.0	0.0	0.0	1.0	0.0
FUCA1	2517	symbol	H. sapiens	2517	H. sapiens	FUCA1	alpha-L-fucosidase 1	GO:0016139 glycoside catabolic process;GO:0019377 glycolipid catabolic process;GO:0006004 fucose metabolic process		Enzymes/ENZYME proteins/Hydrolases				(M5953)HALLMARK KRAS SIGNALING UP; (M5939)HALLMARK P53 PATHWAY; (M5930)HALLMARK EPITHELIAL MESENCHYMAL TRANSITION	1.0	0.0	0.0	0.0	0.0	0.0	0.0	0.0	0.0	0.0	0.0	0.0	0.0	0.0	0.0	0.0	0.0	0.0	0.0	0.0
FURIN	5045	symbol	H. sapiens	5045	H. sapiens	FURIN	furin, paired basic amino acid cleaving enzyme	GO:1901394 positive regulation of transforming growth factor beta1 activation;GO:0032904 negative regulation of nerve growth factor production;GO:1901392 regulation of transforming growth factor beta1 activation		Enzymes/{ENZYME proteins/Hydrolases,Peptidases/Serine-type peptidases}	Golgi apparatus(Supported)Nucleoplasm(Approved)	Decanoic Acid (Serine-type endopeptidase inhibitor activity);Pirfenidone (Serine-type endopeptidase inhibitor activity)	(M17)PID NOTCH PATHWAY; (M255)PID HIF1 TFPATHWAY; (M153)PID P75 NTR PATHWAY	(M5896)HALLMARK TGF BETA SIGNALING; (M5946)HALLMARK COAGULATION; (M5941)HALLMARK UV RESPONSE UP	0.0	0.0	0.0	1.0	0.0	0.0	0.0	0.0	0.0	0.0	0.0	1.0	1.0	0.0	0.0	0.0	0.0	0.0	0.0	0.0
FUT7	2529	symbol	H. sapiens	2529	H. sapiens	FUT7	fucosyltransferase 7	GO:0001807 regulation of type IV hypersensitivity;GO:0002361 CD4-positive, CD25-positive, alpha-beta regulatory T cell differentiation;GO:0042355 L-fucose catabolic process			Golgi apparatus(Approved)				0.0	0.0	1.0	0.0	1.0	1.0	0.0	0.0	0.0	1.0	0.0	0.0	0.0	1.0	0.0	0.0	0.0	0.0	0.0	0.0
FXYD5	53827	symbol	H. sapiens	53827	H. sapiens	FXYD5	FXYD domain containing ion transport regulator 5	GO:0046588 negative regulation of calcium-dependent cell-cell adhesion;GO:0046586 regulation of calcium-dependent cell-cell adhesion;GO:2000649 regulation of sodium ion transmembrane transporter activity		Transporters/Transporter channels and pores	Endoplasmic reticulum(Approved)				0.0	0.0	1.0	0.0	0.0	0.0	0.0	0.0	0.0	0.0	1.0	0.0	0.0	0.0	0.0	0.0	0.0	0.0	0.0	0.0
FYB	2533	gene_synonym	H. sapiens	2533	H. sapiens	FYB1	FYN binding protein 1	GO:0050852 T cell receptor signaling pathway;GO:0050851 antigen receptor-mediated signaling pathway;GO:0002429 immune response-activating cell surface receptor signaling pathway					(M34)PID TCR PATHWAY	(M5950)HALLMARK ALLOGRAFT REJECTION; (M5915)HALLMARK APICAL JUNCTION	0.0	0.0	0.0	0.0	0.0	0.0	1.0	0.0	0.0	0.0	0.0	0.0	1.0	0.0	1.0	0.0	0.0	0.0	0.0	0.0
FZD7	8324	symbol	H. sapiens	8324	H. sapiens	FZD7	frizzled class receptor 7	GO:0042666 negative regulation of ectodermal cell fate specification;GO:0042665 regulation of ectodermal cell fate specification;GO:0001715 ectodermal cell fate specification		G-protein coupled receptors/{Family fz/smo receptors,GPCRs excl olfactory receptors}	Nucleoplasm(Approved)		(M77)PID WNT SIGNALING PATHWAY; (M165)PID SYNDECAN 4 PATHWAY; (M23)PID WNT NONCANONICAL PATHWAY	(M5903)HALLMARK NOTCH SIGNALING	0.0	0.0	1.0	0.0	0.0	0.0	0.0	1.0	0.0	0.0	1.0	0.0	1.0	0.0	0.0	0.0	0.0	0.0	1.0	1.0
G0S2	50486	symbol	H. sapiens	50486	H. sapiens	G0S2	G0/G1 switch 2	GO:2001238 positive regulation of extrinsic apoptotic signaling pathway;GO:0120162 positive regulation of cold-induced thermogenesis;GO:0120161 regulation of cold-induced thermogenesis						(M5935)HALLMARK FATTY ACID METABOLISM; (M5953)HALLMARK KRAS SIGNALING UP; (M5890)HALLMARK TNFA SIGNALING VIA NFKB	0.0	0.0	0.0	0.0	0.0	0.0	0.0	0.0	0.0	0.0	0.0	0.0	0.0	0.0	0.0	0.0	0.0	0.0	0.0	0.0
GAA	2548	symbol	H. sapiens	2548	H. sapiens	GAA	glucosidase alpha, acid	GO:0002086 diaphragm contraction;GO:0003011 involuntary skeletal muscle contraction;GO:0043181 vacuolar sequestering		Enzymes/ENZYME proteins/Hydrolases		Acarbose (Maltose alpha-glucosidase activity);Miglitol (Maltose alpha-glucosidase activity);AT2220 (Maltose alpha-glucosidase activity)	(M288)PID HES HEY PATHWAY	(M5909)HALLMARK MYOGENESIS; (M5891)HALLMARK HYPOXIA	1.0	0.0	0.0	0.0	0.0	0.0	0.0	0.0	0.0	0.0	0.0	0.0	0.0	0.0	0.0	0.0	0.0	0.0	0.0	0.0
GAB3	139716	symbol	H. sapiens	139716	H. sapiens	GAB3	GRB2 associated binding protein 3	GO:0030225 macrophage differentiation;GO:0002573 myeloid leukocyte differentiation;GO:0030099 myeloid cell differentiation							0.0	0.0	1.0	0.0	0.0	0.0	0.0	0.0	0.0	0.0	0.0	0.0	0.0	0.0	0.0	0.0	0.0	0.0	1.0	0.0
GABPB2	126626	symbol	H. sapiens	126626	H. sapiens	GABPB2	GA binding protein transcription factor subunit beta 2	GO:0045944 positive regulation of transcription by RNA polymerase II;GO:0045893 positive regulation of transcription, DNA-templated;GO:1903508 positive regulation of nucleic acid-templated transcription			Nucleoplasm(Supported)Cytosol(Approved)				0.0	0.0	0.0	0.0	0.0	0.0	0.0	0.0	0.0	0.0	0.0	0.0	0.0	0.0	0.0	0.0	0.0	0.0	0.0	0.0
GADD45B	4616	symbol	H. sapiens	4616	H. sapiens	GADD45B	growth arrest and DNA damage inducible beta	GO:0000185 activation of MAPKKK activity;GO:1900745 positive regulation of p38MAPK cascade;GO:0000186 activation of MAPKK activity			Cytosol;Nucleoplasm(Approved)		(M20)PID P38 MKK3 6PATHWAY; (M54)PID IL12 2PATHWAY	(M5902)HALLMARK APOPTOSIS; (M5947)HALLMARK IL2 STAT5 SIGNALING; (M5930)HALLMARK EPITHELIAL MESENCHYMAL TRANSITION	0.0	0.0	0.0	0.0	0.0	0.0	0.0	0.0	0.0	0.0	0.0	0.0	0.0	0.0	0.0	0.0	0.0	0.0	0.0	0.0
GAL3ST4	79690	symbol	H. sapiens	79690	H. sapiens	GAL3ST4	galactose-3-O-sulfotransferase 4	GO:0030166 proteoglycan biosynthetic process;GO:0009247 glycolipid biosynthetic process;GO:0006029 proteoglycan metabolic process			Cytosol;Nucleoplasm(Approved)				0.0	0.0	0.0	0.0	0.0	0.0	0.0	0.0	0.0	0.0	0.0	0.0	0.0	0.0	0.0	0.0	0.0	0.0	0.0	0.0
GALNT2	2590	symbol	H. sapiens	2590	H. sapiens	GALNT2	polypeptide N-acetylgalactosaminyltransferase 2	GO:0018243 protein O-linked glycosylation via threonine;GO:0002378 immunoglobulin biosynthetic process;GO:0018242 protein O-linked glycosylation via serine		Enzymes/ENZYME proteins/Transferases	Golgi apparatus(Enhanced)				0.0	0.0	0.0	0.0	0.0	1.0	0.0	0.0	0.0	0.0	0.0	0.0	0.0	0.0	0.0	0.0	0.0	0.0	0.0	0.0
GALNT5	11227	symbol	H. sapiens	11227	H. sapiens	GALNT5	polypeptide N-acetylgalactosaminyltransferase 5	GO:0016266 O-glycan processing;GO:0006024 glycosaminoglycan biosynthetic process;GO:0006493 protein O-linked glycosylation		Enzymes/ENZYME proteins/Transferases	Cytosol;Golgi apparatus;Nucleoli;Vesicles(Approved)				0.0	0.0	0.0	0.0	0.0	0.0	0.0	0.0	0.0	0.0	0.0	0.0	0.0	0.0	0.0	0.0	0.0	0.0	0.0	0.0
GALNT6	11226	symbol	H. sapiens	11226	H. sapiens	GALNT6	polypeptide N-acetylgalactosaminyltransferase 6	GO:0016266 O-glycan processing;GO:0006493 protein O-linked glycosylation;GO:0006486 protein glycosylation		Enzymes/ENZYME proteins/Transferases	Golgi apparatus;Nucleoplasm(Approved)				0.0	0.0	0.0	0.0	0.0	0.0	0.0	0.0	0.0	0.0	0.0	0.0	0.0	0.0	0.0	0.0	0.0	0.0	0.0	0.0
GAPT	202309	symbol	H. sapiens	202309	H. sapiens	GAPT	GRB2 binding adaptor protein, transmembrane	GO:0002322 B cell proliferation involved in immune response;GO:0001782 B cell homeostasis;GO:0002381 immunoglobulin production involved in immunoglobulin mediated immune response							1.0	0.0	1.0	0.0	0.0	1.0	0.0	0.0	0.0	1.0	0.0	0.0	0.0	0.0	0.0	0.0	0.0	0.0	0.0	0.0
GAS6	2621	symbol	H. sapiens	2621	H. sapiens	GAS6	growth arrest specific 6	GO:2000533 negative regulation of renal albumin absorption;GO:0019064 fusion of virus membrane with host plasma membrane;GO:0003104 positive regulation of glomerular filtration			Cytosol;Microtubule organizing center(Approved)		(M3008)NABA ECM GLYCOPROTEINS; (M5884)NABA CORE MATRISOME; (M5889)NABA MATRISOME		1.0	1.0	1.0	1.0	1.0	1.0	0.0	0.0	0.0	0.0	0.0	1.0	0.0	1.0	0.0	0.0	0.0	0.0	0.0	1.0
GATA3	2625	symbol	H. sapiens	2625	H. sapiens	GATA3	GATA binding protein 3	GO:2000703 negative regulation of fibroblast growth factor receptor signaling pathway involved in ureteric bud formation;GO:2000734 negative regulation of glial cell-derived neurotrophic factor receptor signaling pathway involved in ureteric bud formation;GO:2000702 regulation of fibroblast growth factor receptor signaling pathway involved in ureteric bud formation		Transcription factors/Zinc-coordinating DNA-binding domains	Nucleoplasm(Supported)		(M36)PID IL27 PATHWAY; (M60)PID NFAT TFPATHWAY; (M17)PID NOTCH PATHWAY	(M5916)HALLMARK APICAL SURFACE; (M5921)HALLMARK COMPLEMENT	1.0	1.0	1.0	1.0	1.0	1.0	1.0	0.0	0.0	1.0	1.0	0.0	1.0	1.0	0.0	0.0	0.0	0.0	1.0	1.0
GBGT1	26301	symbol	H. sapiens	26301	H. sapiens	GBGT1	globoside alpha-1,3-N-acetylgalactosaminyltransferase 1 (FORS blood group)	GO:0030259 lipid glycosylation;GO:0009247 glycolipid biosynthetic process;GO:0006664 glycolipid metabolic process							0.0	0.0	0.0	0.0	0.0	0.0	0.0	0.0	0.0	0.0	0.0	0.0	0.0	0.0	0.0	0.0	0.0	0.0	0.0	0.0
GBP2	2634	symbol	H. sapiens	2634	H. sapiens	GBP2	guanylate binding protein 2	GO:0060333 interferon-gamma-mediated signaling pathway;GO:0042832 defense response to protozoan;GO:0060337 type I interferon signaling pathway			Actin filaments;Cytosol;Nucleoplasm(Supported)			(M5911)HALLMARK INTERFERON ALPHA RESPONSE; (M5950)HALLMARK ALLOGRAFT REJECTION	0.0	1.0	0.0	0.0	0.0	0.0	0.0	1.0	0.0	0.0	0.0	0.0	0.0	0.0	0.0	0.0	0.0	0.0	0.0	0.0
GBP5	115362	symbol	H. sapiens	115362	H. sapiens	GBP5	guanylate binding protein 5	GO:0072616 interleukin-18 secretion;GO:1900227 positive regulation of NLRP3 inflammasome complex assembly;GO:1900017 positive regulation of cytokine production involved in inflammatory response			Endoplasmic reticulum(Approved)				0.0	0.0	0.0	1.0	0.0	0.0	0.0	1.0	1.0	0.0	0.0	0.0	0.0	1.0	0.0	0.0	0.0	0.0	0.0	0.0
GCKR	2646	symbol	H. sapiens	2646	H. sapiens	GCKR	glucokinase regulator	GO:0033132 negative regulation of glucokinase activity;GO:0006110 regulation of glycolytic process;GO:1903300 negative regulation of hexokinase activity			Intermediate filaments(Approved)			(M5934)HALLMARK XENOBIOTIC METABOLISM	0.0	0.0	0.0	0.0	0.0	0.0	0.0	0.0	0.0	0.0	0.0	0.0	0.0	0.0	0.0	0.0	0.0	0.0	0.0	0.0
GCNT1	2650	symbol	H. sapiens	2650	H. sapiens	GCNT1	glucosaminyl (N-acetyl) transferase 1	GO:0050901 leukocyte tethering or rolling;GO:0016266 O-glycan processing;GO:0060352 cell adhesion molecule production		Enzymes/ENZYME proteins/Transferases	Nuclear speckles(Supported)			(M5942)HALLMARK UV RESPONSE DN; (M5950)HALLMARK ALLOGRAFT REJECTION	0.0	0.0	1.0	0.0	1.0	0.0	0.0	0.0	0.0	0.0	0.0	0.0	0.0	0.0	0.0	0.0	0.0	0.0	0.0	0.0
GFI1	2672	symbol	H. sapiens	2672	H. sapiens	GFI1	growth factor independent 1 transcriptional repressor	GO:0010956 negative regulation of calcidiol 1-monooxygenase activity;GO:0070105 positive regulation of interleukin-6-mediated signaling pathway;GO:0010957 negative regulation of vitamin D biosynthetic process		Transcription factors/Zinc-coordinating DNA-binding domains			(M254)PID MYC REPRESS PATHWAY	(M5951)HALLMARK SPERMATOGENESIS	0.0	1.0	0.0	0.0	0.0	0.0	1.0	1.0	1.0	0.0	0.0	0.0	0.0	0.0	0.0	0.0	0.0	0.0	1.0	0.0
GFPT2	9945	symbol	H. sapiens	9945	H. sapiens	GFPT2	glutamine-fructose-6-phosphate transaminase 2	GO:0006048 UDP-N-acetylglucosamine biosynthetic process;GO:0006541 glutamine metabolic process;GO:0006047 UDP-N-acetylglucosamine metabolic process		Enzymes/ENZYME proteins/Transferases	Vesicles(Supported)			(M5953)HALLMARK KRAS SIGNALING UP; (M5890)HALLMARK TNFA SIGNALING VIA NFKB	0.0	0.0	0.0	0.0	0.0	0.0	0.0	0.0	0.0	0.0	0.0	0.0	0.0	0.0	0.0	0.0	0.0	0.0	0.0	0.0
GGT5	2687	symbol	H. sapiens	2687	H. sapiens	GGT5	gamma-glutamyltransferase 5	GO:1901750 leukotriene D4 biosynthetic process;GO:1901748 leukotriene D4 metabolic process;GO:0019370 leukotriene biosynthetic process		Enzymes/ENZYME proteins/{Hydrolases,Transferases}	Nucleoli fibrillar center(Approved)				0.0	0.0	0.0	0.0	0.0	0.0	0.0	1.0	0.0	0.0	0.0	0.0	0.0	0.0	0.0	0.0	0.0	0.0	0.0	0.0
GIMAP1	170575	symbol	H. sapiens	170575	H. sapiens	GIMAP1	GTPase, IMAP family member 1				Endoplasmic reticulum(Supported)				0.0	0.0	0.0	0.0	0.0	0.0	0.0	0.0	0.0	0.0	0.0	0.0	0.0	0.0	0.0	0.0	0.0	0.0	0.0	0.0
GIMAP4	55303	symbol	H. sapiens	55303	H. sapiens	GIMAP4	GTPase, IMAP family member 4								0.0	0.0	0.0	0.0	0.0	0.0	0.0	0.0	0.0	0.0	0.0	0.0	0.0	0.0	0.0	0.0	0.0	0.0	0.0	0.0
GIMAP5	55340	symbol	H. sapiens	55340	H. sapiens	GIMAP5	GTPase, IMAP family member 5								0.0	0.0	0.0	0.0	0.0	0.0	0.0	0.0	0.0	0.0	0.0	0.0	0.0	0.0	0.0	0.0	0.0	0.0	0.0	0.0
GIMAP6	474344	symbol	H. sapiens	474344	H. sapiens	GIMAP6	GTPase, IMAP family member 6				Cytosol(Approved)Nucleoplasm(Uncertain)				0.0	0.0	0.0	0.0	0.0	0.0	0.0	0.0	0.0	0.0	0.0	0.0	0.0	0.0	0.0	0.0	0.0	0.0	0.0	0.0
GIMAP7	168537	symbol	H. sapiens	168537	H. sapiens	GIMAP7	GTPase, IMAP family member 7	GO:0046039 GTP metabolic process;GO:1901068 guanosine-containing compound metabolic process;GO:0046128 purine ribonucleoside metabolic process			Cytosol;Vesicles(Approved)				0.0	0.0	0.0	0.0	0.0	0.0	0.0	0.0	0.0	0.0	0.0	0.0	0.0	0.0	0.0	0.0	0.0	0.0	0.0	0.0
GIMAP8	155038	symbol	H. sapiens	155038	H. sapiens	GIMAP8	GTPase, IMAP family member 8	GO:0070232 regulation of T cell apoptotic process;GO:0070231 T cell apoptotic process;GO:0070228 regulation of lymphocyte apoptotic process							0.0	0.0	0.0	0.0	0.0	0.0	0.0	0.0	0.0	0.0	0.0	0.0	0.0	0.0	0.0	0.0	0.0	0.0	0.0	0.0
GIPC2	54810	symbol	H. sapiens	54810	H. sapiens	GIPC2	GIPC PDZ domain containing family member 2	GO:0008150 biological_process			Cytosol(Supported)Nucleus(Approved)				0.0	0.0	0.0	0.0	0.0	0.0	0.0	0.0	0.0	0.0	0.0	0.0	0.0	0.0	0.0	0.0	0.0	0.0	0.0	0.0
GJB2	2706	symbol	H. sapiens	2706	H. sapiens	GJB2	gap junction protein beta 2	GO:0044752 response to human chorionic gonadotropin;GO:1905867 epididymis development;GO:0071377 cellular response to glucagon stimulus		Transporters/Transporter channels and pores	Mitochondria(Approved)				0.0	0.0	0.0	0.0	0.0	0.0	0.0	1.0	0.0	0.0	0.0	0.0	0.0	0.0	0.0	0.0	0.0	0.0	0.0	0.0
GLB1L	79411	symbol	H. sapiens	79411	H. sapiens	GLB1L	galactosidase beta 1 like	GO:0005975 carbohydrate metabolic process;GO:0044238 primary metabolic process;GO:0071704 organic substance metabolic process							0.0	0.0	0.0	0.0	0.0	0.0	0.0	0.0	0.0	0.0	0.0	0.0	0.0	0.0	0.0	0.0	0.0	0.0	0.0	0.0
GLIPR1	11010	symbol	H. sapiens	11010	H. sapiens	GLIPR1	GLI pathogenesis related 1	GO:0043312 neutrophil degranulation;GO:0002283 neutrophil activation involved in immune response;GO:0042119 neutrophil activation				SOT-107		(M5930)HALLMARK EPITHELIAL MESENCHYMAL TRANSITION	1.0	0.0	0.0	0.0	0.0	0.0	0.0	0.0	0.0	0.0	0.0	0.0	0.0	0.0	0.0	0.0	0.0	0.0	0.0	0.0
GLMP	112770	symbol	H. sapiens	112770	H. sapiens	GLMP	glycosylated lysosomal membrane protein	GO:0045944 positive regulation of transcription by RNA polymerase II;GO:0045893 positive regulation of transcription, DNA-templated;GO:1903508 positive regulation of nucleic acid-templated transcription							0.0	0.0	0.0	0.0	0.0	0.0	0.0	0.0	0.0	0.0	0.0	0.0	0.0	0.0	0.0	0.0	0.0	0.0	0.0	0.0
GM2A	2760	symbol	H. sapiens	2760	H. sapiens	GM2A	GM2 ganglioside activator	GO:0006689 ganglioside catabolic process;GO:0046479 glycosphingolipid catabolic process;GO:0046514 ceramide catabolic process				Platelet Activating Factor (Phospholipase activator activity);Isopropyl Alcohol (Phospholipase activator activity);Lauric Acid (Phospholipase activator activity);Lpc-Ether (Phospholipase activator activity);Choline alfoscerate (Phospholipase activator activity);MYRISTIC ACID (Phospholipase activator activity)		(M5939)HALLMARK P53 PATHWAY	1.0	0.0	0.0	0.0	0.0	0.0	0.0	0.0	0.0	0.0	0.0	0.0	0.0	0.0	0.0	0.0	0.0	0.0	0.0	0.0
GMIP	51291	symbol	H. sapiens	51291	H. sapiens	GMIP	GEM interacting protein	GO:0034260 negative regulation of GTPase activity;GO:0043547 positive regulation of GTPase activity;GO:0051056 regulation of small GTPase mediated signal transduction			Cytosol;Nucleoplasm(Enhanced)Plasma membrane(Approved)				0.0	0.0	0.0	0.0	0.0	0.0	0.0	0.0	0.0	0.0	0.0	0.0	0.0	0.0	0.0	0.0	0.0	0.0	0.0	0.0
GNA15	2769	symbol	H. sapiens	2769	H. sapiens	GNA15	G protein subunit alpha 15	GO:0007207 phospholipase C-activating G protein-coupled acetylcholine receptor signaling pathway;GO:0007202 activation of phospholipase C activity;GO:0007213 G protein-coupled acetylcholine receptor signaling pathway					(M138)PID THROMBIN PAR4 PATHWAY; (M155)PID S1P META PATHWAY; (M268)PID S1P S1P2 PATHWAY	(M5902)HALLMARK APOPTOSIS; (M5932)HALLMARK INFLAMMATORY RESPONSE	0.0	0.0	0.0	0.0	0.0	0.0	0.0	0.0	0.0	0.0	0.0	0.0	0.0	0.0	0.0	0.0	0.0	0.0	0.0	1.0
GNRH1	2796	symbol	H. sapiens	2796	H. sapiens	GNRH1	gonadotropin releasing hormone 1	GO:0033087 negative regulation of immature T cell proliferation;GO:2000354 regulation of ovarian follicle development;GO:0033083 regulation of immature T cell proliferation					(M213)PID AR NONGENOMIC PATHWAY		0.0	0.0	1.0	0.0	0.0	0.0	0.0	1.0	0.0	0.0	1.0	0.0	0.0	0.0	0.0	0.0	0.0	0.0	1.0	0.0
GNS	2799	symbol	H. sapiens	2799	H. sapiens	GNS	glucosamine (N-acetyl)-6-sulfatase	GO:0042340 keratan sulfate catabolic process;GO:0042339 keratan sulfate metabolic process;GO:0043312 neutrophil degranulation		Enzymes/ENZYME proteins/Hydrolases					1.0	0.0	0.0	0.0	0.0	0.0	0.0	0.0	0.0	0.0	0.0	0.0	0.0	0.0	0.0	0.0	0.0	0.0	0.0	0.0
GOLGA8N	643699	symbol	H. sapiens	643699	H. sapiens	GOLGA8N	golgin A8 family member N	GO:0051225 spindle assembly;GO:0007030 Golgi organization;GO:0007051 spindle organization							0.0	0.0	0.0	0.0	0.0	0.0	0.0	0.0	0.0	0.0	0.0	0.0	0.0	0.0	0.0	0.0	0.0	0.0	0.0	0.0
GOLGA8R	101059918	symbol	H. sapiens	101059918	H. sapiens	GOLGA8R	golgin A8 family member R	GO:0051225 spindle assembly;GO:0007030 Golgi organization;GO:0007051 spindle organization							0.0	0.0	0.0	0.0	0.0	0.0	0.0	0.0	0.0	0.0	0.0	0.0	0.0	0.0	0.0	0.0	0.0	0.0	0.0	0.0
GPBAR1	151306	symbol	H. sapiens	151306	H. sapiens	GPBAR1	G protein-coupled bile acid receptor 1	GO:1904056 positive regulation of cholangiocyte proliferation;GO:0038184 cell surface bile acid receptor signaling pathway;GO:1904054 regulation of cholangiocyte proliferation		G-protein coupled receptors/GPCRs excl olfactory receptors;Transporters					0.0	0.0	0.0	0.0	0.0	0.0	0.0	1.0	0.0	0.0	0.0	0.0	0.0	0.0	0.0	0.0	0.0	0.0	0.0	0.0
GPR132	29933	symbol	H. sapiens	29933	H. sapiens	GPR132	G protein-coupled receptor 132	GO:0010972 negative regulation of G2/M transition of mitotic cell cycle;GO:1902750 negative regulation of cell cycle G2/M phase transition;GO:0010389 regulation of G2/M transition of mitotic cell cycle		G-protein coupled receptors/GPCRs excl olfactory receptors				(M5932)HALLMARK INFLAMMATORY RESPONSE	0.0	0.0	0.0	0.0	0.0	0.0	0.0	0.0	0.0	0.0	0.0	0.0	0.0	0.0	0.0	0.0	0.0	0.0	0.0	0.0
GPR141	353345	symbol	H. sapiens	353345	H. sapiens	GPR141	G protein-coupled receptor 141	GO:0007186 G protein-coupled receptor signaling pathway;GO:0007165 signal transduction;GO:0023052 signaling		G-protein coupled receptors/GPCRs excl olfactory receptors					0.0	0.0	0.0	0.0	0.0	0.0	0.0	0.0	0.0	0.0	0.0	0.0	0.0	0.0	0.0	0.0	0.0	0.0	0.0	0.0
GPR157	80045	symbol	H. sapiens	80045	H. sapiens	GPR157	G protein-coupled receptor 157	GO:0051482 positive regulation of cytosolic calcium ion concentration involved in phospholipase C-activating G protein-coupled signaling pathway;GO:0060019 radial glial cell differentiation;GO:0007204 positive regulation of cytosolic calcium ion concentration		G-protein coupled receptors/{Family 2 (B) receptors,GPCRs excl olfactory receptors}	Cell Junctions;Nucleoli;Plasma membrane(Uncertain)				0.0	0.0	0.0	0.0	0.0	0.0	0.0	0.0	0.0	0.0	0.0	0.0	0.0	0.0	0.0	0.0	0.0	0.0	0.0	0.0
GPR160	26996	symbol	H. sapiens	26996	H. sapiens	GPR160	G protein-coupled receptor 160	GO:0007186 G protein-coupled receptor signaling pathway;GO:0007165 signal transduction;GO:0023052 signaling		G-protein coupled receptors/GPCRs excl olfactory receptors;Transporters	Plasma membrane(Supported)				0.0	0.0	0.0	0.0	0.0	0.0	0.0	0.0	0.0	0.0	0.0	0.0	0.0	0.0	0.0	0.0	0.0	0.0	0.0	0.0
GPR171	29909	symbol	H. sapiens	29909	H. sapiens	GPR171	G protein-coupled receptor 171	GO:0035589 G protein-coupled purinergic nucleotide receptor signaling pathway;GO:0035590 purinergic nucleotide receptor signaling pathway;GO:0035588 G protein-coupled purinergic receptor signaling pathway		G-protein coupled receptors/GPCRs excl olfactory receptors					0.0	0.0	1.0	0.0	0.0	0.0	0.0	0.0	0.0	0.0	1.0	0.0	0.0	0.0	0.0	0.0	0.0	0.0	1.0	0.0
GPR18	2841	symbol	H. sapiens	2841	H. sapiens	GPR18	G protein-coupled receptor 18	GO:0002300 CD8-positive, alpha-beta intraepithelial T cell differentiation;GO:0002305 CD8-positive, gamma-delta intraepithelial T cell differentiation;GO:0002299 alpha-beta intraepithelial T cell differentiation		G-protein coupled receptors/GPCRs excl olfactory receptors		Glycine (G-protein coupled receptor activity)		(M5913)HALLMARK INTERFERON GAMMA RESPONSE	0.0	0.0	1.0	1.0	1.0	0.0	0.0	0.0	0.0	1.0	1.0	0.0	0.0	0.0	0.0	0.0	0.0	0.0	0.0	0.0
GPR183	1880	symbol	H. sapiens	1880	H. sapiens	GPR183	G protein-coupled receptor 183	GO:0061470 T follicular helper cell differentiation;GO:2000458 regulation of astrocyte chemotaxis;GO:0035700 astrocyte chemotaxis		G-protein coupled receptors/GPCRs excl olfactory receptors	Nuclear membrane;Vesicles(Approved)			(M5932)HALLMARK INFLAMMATORY RESPONSE; (M5890)HALLMARK TNFA SIGNALING VIA NFKB	1.0	0.0	1.0	0.0	1.0	1.0	0.0	0.0	0.0	1.0	0.0	0.0	0.0	0.0	0.0	0.0	0.0	0.0	1.0	0.0
GPR39	2863	symbol	H. sapiens	2863	H. sapiens	GPR39	G protein-coupled receptor 39	GO:0007186 G protein-coupled receptor signaling pathway;GO:0007165 signal transduction;GO:0023052 signaling		G-protein coupled receptors/GPCRs excl olfactory receptors					0.0	0.0	0.0	0.0	0.0	0.0	0.0	0.0	0.0	0.0	0.0	0.0	0.0	0.0	0.0	0.0	0.0	0.0	0.0	0.0
GPR55	9290	symbol	H. sapiens	9290	H. sapiens	GPR55	G protein-coupled receptor 55	GO:0045671 negative regulation of osteoclast differentiation;GO:0007202 activation of phospholipase C activity;GO:0051482 positive regulation of cytosolic calcium ion concentration involved in phospholipase C-activating G protein-coupled signaling pathway		G-protein coupled receptors/GPCRs excl olfactory receptors					0.0	0.0	1.0	0.0	0.0	0.0	0.0	0.0	0.0	0.0	1.0	0.0	0.0	0.0	0.0	0.0	0.0	0.0	1.0	0.0
GPR65	8477	symbol	H. sapiens	8477	H. sapiens	GPR65	G protein-coupled receptor 65	GO:0051496 positive regulation of stress fiber assembly;GO:0051482 positive regulation of cytosolic calcium ion concentration involved in phospholipase C-activating G protein-coupled signaling pathway;GO:0051492 regulation of stress fiber assembly		G-protein coupled receptors/{GPCRs excl olfactory receptors,Lysolipids receptors}	Cytosol(Approved)			(M5947)HALLMARK IL2 STAT5 SIGNALING; (M5950)HALLMARK ALLOGRAFT REJECTION	0.0	0.0	0.0	0.0	0.0	0.0	0.0	0.0	0.0	0.0	0.0	0.0	0.0	0.0	0.0	0.0	0.0	0.0	0.0	0.0
GPR84	53831	symbol	H. sapiens	53831	H. sapiens	GPR84	G protein-coupled receptor 84	GO:0043312 neutrophil degranulation;GO:0002283 neutrophil activation involved in immune response;GO:0042119 neutrophil activation		G-protein coupled receptors/GPCRs excl olfactory receptors					1.0	0.0	0.0	0.0	0.0	0.0	0.0	0.0	0.0	0.0	0.0	0.0	0.0	0.0	0.0	0.0	0.0	0.0	0.0	0.0
GPR97	222487	gene_synonym	H. sapiens	222487	H. sapiens	ADGRG3	adhesion G protein-coupled receptor G3	GO:0032792 negative regulation of CREB transcription factor activity;GO:1901223 negative regulation of NIK/NF-kappaB signaling;GO:0043312 neutrophil degranulation		G-protein coupled receptors/{Family 2 (B) receptors,GPCRs excl olfactory receptors}					1.0	0.0	1.0	0.0	0.0	0.0	0.0	0.0	0.0	0.0	0.0	0.0	0.0	0.0	0.0	0.0	0.0	0.0	0.0	0.0
GPRC5A	9052	symbol	H. sapiens	9052	H. sapiens	GPRC5A	G protein-coupled receptor class C group 5 member A	GO:0007175 negative regulation of epidermal growth factor-activated receptor activity;GO:0007176 regulation of epidermal growth factor-activated receptor activity;GO:0061099 negative regulation of protein tyrosine kinase activity		G-protein coupled receptors/GPCRs excl olfactory receptors	Plasma membrane;Vesicles(Enhanced)	Tretinoin (G-protein coupled receptor activity)			0.0	0.0	0.0	0.0	0.0	0.0	0.0	0.0	0.0	0.0	0.0	0.0	0.0	0.0	0.0	0.0	0.0	0.0	0.0	0.0
GPRIN3	285513	symbol	H. sapiens	285513	H. sapiens	GPRIN3	GPRIN family member 3				Nucleoli;Nucleus(Approved)				0.0	0.0	0.0	0.0	0.0	0.0	0.0	0.0	0.0	0.0	0.0	0.0	0.0	0.0	0.0	0.0	0.0	0.0	0.0	0.0
GPSM3	63940	symbol	H. sapiens	63940	H. sapiens	GPSM3	G protein signaling modulator 3	GO:1900017 positive regulation of cytokine production involved in inflammatory response;GO:1900015 regulation of cytokine production involved in inflammatory response;GO:0002690 positive regulation of leukocyte chemotaxis							0.0	0.0	0.0	1.0	1.0	0.0	0.0	0.0	1.0	0.0	0.0	0.0	0.0	1.0	0.0	0.0	0.0	0.0	0.0	0.0
GPX8	493869	symbol	H. sapiens	493869	H. sapiens	GPX8	glutathione peroxidase 8 (putative)	GO:0098869 cellular oxidant detoxification;GO:1990748 cellular detoxification;GO:0098754 detoxification		Enzymes/ENZYME proteins/Oxidoreductases	Actin filaments;Cytosol(Supported)	Glutathione (Peroxidase activity)		(M5892)HALLMARK CHOLESTEROL HOMEOSTASIS	0.0	0.0	0.0	0.0	0.0	0.0	0.0	0.0	0.0	0.0	0.0	0.0	0.0	0.0	0.0	0.0	0.0	0.0	0.0	0.0
GRAP2	9402	symbol	H. sapiens	9402	H. sapiens	GRAP2	GRB2 related adaptor protein 2	GO:0031295 T cell costimulation;GO:0031294 lymphocyte costimulation;GO:0038095 Fc-epsilon receptor signaling pathway					(M190)PID TCR JNK PATHWAY; (M9526)ST T CELL SIGNAL TRANSDUCTION; (M231)PID KIT PATHWAY		0.0	0.0	1.0	0.0	0.0	0.0	1.0	0.0	0.0	0.0	0.0	0.0	1.0	0.0	1.0	0.0	0.0	0.0	0.0	0.0
GRIN3B	116444	symbol	H. sapiens	116444	H. sapiens	GRIN3B	glutamate ionotropic receptor NMDA type subunit 3B	GO:0035235 ionotropic glutamate receptor signaling pathway;GO:0051205 protein insertion into membrane;GO:0035249 synaptic transmission, glutamatergic				L-Glutamic Acid (Nmda glutamate receptor activity);Glycine (Nmda glutamate receptor activity);Halothane (Nmda glutamate receptor activity);Orphenadrine (Nmda glutamate receptor activity);Tenocyclidine (Nmda glutamate receptor activity)			0.0	0.0	0.0	0.0	0.0	0.0	0.0	0.0	0.0	0.0	0.0	0.0	0.0	0.0	0.0	0.0	0.0	0.0	0.0	0.0
GRN	2896	symbol	H. sapiens	2896	H. sapiens	GRN	granulin precursor	GO:0007042 lysosomal lumen acidification;GO:1905673 positive regulation of lysosome organization;GO:0002265 astrocyte activation involved in immune response			Endoplasmic reticulum;Endosomes;Lysosomes(Enhanced)				1.0	0.0	1.0	0.0	1.0	1.0	0.0	1.0	1.0	0.0	1.0	0.0	0.0	1.0	0.0	0.0	0.0	0.0	0.0	1.0
GSAP	54103	symbol	H. sapiens	54103	H. sapiens	GSAP	gamma-secretase activating protein	GO:1902004 positive regulation of amyloid-beta formation;GO:1902993 positive regulation of amyloid precursor protein catabolic process;GO:1902003 regulation of amyloid-beta formation			Vesicles(Supported)				0.0	0.0	0.0	0.0	0.0	0.0	0.0	0.0	0.0	0.0	0.0	0.0	0.0	0.0	0.0	0.0	0.0	0.0	0.0	0.0
GSDMD	79792	symbol	H. sapiens	79792	H. sapiens	GSDMD	gasdermin D	GO:0050718 positive regulation of interleukin-1 beta secretion;GO:0035915 pore formation in membrane of other organism;GO:0050716 positive regulation of interleukin-1 secretion		Transporters/Transporter channels and pores	Nucleoplasm(Supported)				1.0	0.0	0.0	1.0	0.0	0.0	0.0	1.0	0.0	0.0	0.0	0.0	0.0	0.0	0.0	0.0	0.0	0.0	0.0	0.0
GUSB	2990	symbol	H. sapiens	2990	H. sapiens	GUSB	glucuronidase beta	GO:0019391 glucuronoside catabolic process;GO:0030214 hyaluronan catabolic process;GO:0019389 glucuronoside metabolic process		Enzymes/ENZYME proteins/Hydrolases	Vesicles(Supported)			(M5892)HALLMARK CHOLESTEROL HOMEOSTASIS; (M5937)HALLMARK GLYCOLYSIS	1.0	0.0	0.0	0.0	0.0	0.0	0.0	0.0	0.0	0.0	0.0	0.0	0.0	0.0	0.0	0.0	0.0	0.0	0.0	0.0
GXYLT2	727936	symbol	H. sapiens	727936	H. sapiens	GXYLT2	glucoside xylosyltransferase 2	GO:0016266 O-glycan processing;GO:0006493 protein O-linked glycosylation;GO:0006486 protein glycosylation		Enzymes/ENZYME proteins/Transferases	Cytokinetic bridge;Midbody ring;Nucleoplasm(Approved)				0.0	0.0	0.0	0.0	0.0	0.0	0.0	0.0	0.0	0.0	0.0	0.0	0.0	0.0	0.0	0.0	0.0	0.0	0.0	0.0
GZMA	3001	symbol	H. sapiens	3001	H. sapiens	GZMA	granzyme A	GO:0032078 negative regulation of endodeoxyribonuclease activity;GO:0032076 negative regulation of deoxyribonuclease activity;GO:0032071 regulation of endodeoxyribonuclease activity		Enzymes/{ENZYME proteins/Hydrolases,Peptidases/Serine-type peptidases}			(M54)PID IL12 2PATHWAY	(M5921)HALLMARK COMPLEMENT; (M5913)HALLMARK INTERFERON GAMMA RESPONSE; (M5950)HALLMARK ALLOGRAFT REJECTION	0.0	0.0	0.0	0.0	0.0	0.0	0.0	1.0	0.0	0.0	0.0	0.0	0.0	0.0	0.0	0.0	0.0	0.0	0.0	0.0
GZMB	3002	symbol	H. sapiens	3002	H. sapiens	GZMB	granzyme B	GO:1900740 positive regulation of protein insertion into mitochondrial membrane involved in apoptotic signaling pathway;GO:1900739 regulation of protein insertion into mitochondrial membrane involved in apoptotic signaling pathway;GO:1901030 positive regulation of mitochondrial outer membrane permeabilization involved in apoptotic signaling pathway		Enzymes/{ENZYME proteins/Hydrolases,Peptidases/Serine-type peptidases}			(M7997)SA CASPASE CASCADE; (M220)PID CASPASE PATHWAY; (M54)PID IL12 2PATHWAY	(M5921)HALLMARK COMPLEMENT; (M5950)HALLMARK ALLOGRAFT REJECTION	0.0	0.0	0.0	1.0	0.0	1.0	0.0	0.0	0.0	0.0	0.0	0.0	1.0	0.0	0.0	0.0	0.0	0.0	0.0	0.0
GZMM	3004	symbol	H. sapiens	3004	H. sapiens	GZMM	granzyme M	GO:0001913 T cell mediated cytotoxicity;GO:0019835 cytolysis;GO:0002456 T cell mediated immunity		Enzymes/Peptidases/Serine-type peptidases					0.0	0.0	0.0	0.0	0.0	1.0	0.0	0.0	0.0	0.0	0.0	0.0	0.0	0.0	0.0	0.0	0.0	0.0	0.0	0.0
H6PD	9563	symbol	H. sapiens	9563	H. sapiens	H6PD	hexose-6-phosphate dehydrogenase/glucose 1-dehydrogenase	GO:2000064 regulation of cortisol biosynthetic process;GO:0009051 pentose-phosphate shunt, oxidative branch;GO:0031946 regulation of glucocorticoid biosynthetic process		Enzymes/ENZYME proteins/{Hydrolases,Oxidoreductases}	Cytosol(Uncertain)	NADH (Nadp binding)			0.0	0.0	0.0	0.0	0.0	0.0	0.0	0.0	0.0	0.0	0.0	0.0	0.0	0.0	0.0	0.0	0.0	0.0	0.0	0.0
HAL	3034	symbol	H. sapiens	3034	H. sapiens	HAL	histidine ammonia-lyase	GO:0019557 histidine catabolic process to glutamate and formate;GO:0019556 histidine catabolic process to glutamate and formamide;GO:0006548 histidine catabolic process		Enzymes/ENZYME proteins/Lyases	Cytosol(Uncertain)	L-Histidine (Histidine ammonia-lyase activity)			0.0	0.0	0.0	0.0	0.0	0.0	0.0	0.0	0.0	0.0	0.0	0.0	0.0	0.0	0.0	0.0	0.0	0.0	0.0	0.0
HAMP	57817	symbol	H. sapiens	57817	H. sapiens	HAMP	hepcidin antimicrobial peptide	GO:0034760 negative regulation of iron ion transmembrane transport;GO:0061051 positive regulation of cell growth involved in cardiac muscle cell development;GO:0034757 negative regulation of iron ion transport		Transporters/Accessory Factors Involved in Transport					0.0	0.0	0.0	0.0	0.0	0.0	0.0	1.0	0.0	0.0	0.0	0.0	0.0	0.0	0.0	0.0	0.0	0.0	0.0	0.0
HAS3	3038	symbol	H. sapiens	3038	H. sapiens	HAS3	hyaluronan synthase 3	GO:1900106 positive regulation of hyaluranon cable assembly;GO:1900104 regulation of hyaluranon cable assembly;GO:0045226 extracellular polysaccharide biosynthetic process		Enzymes/ENZYME proteins/Transferases	Microtubules(Approved)				0.0	0.0	0.0	0.0	0.0	0.0	0.0	0.0	0.0	0.0	0.0	1.0	0.0	0.0	0.0	0.0	0.0	0.0	0.0	0.0
HCAR2	338442	symbol	H. sapiens	338442	H. sapiens	HCAR2	hydroxycarboxylic acid receptor 2	GO:0070165 positive regulation of adiponectin secretion;GO:0033031 positive regulation of neutrophil apoptotic process;GO:0070163 regulation of adiponectin secretion		G-protein coupled receptors/GPCRs excl olfactory receptors	Cell Junctions(Approved)	Niacin (Nicotinic acid receptor activity)			0.0	0.0	0.0	1.0	0.0	0.0	0.0	0.0	0.0	0.0	0.0	0.0	0.0	0.0	0.0	0.0	0.0	0.0	0.0	0.0
HCAR3	8843	symbol	H. sapiens	8843	H. sapiens	HCAR3	hydroxycarboxylic acid receptor 3	GO:0007186 G protein-coupled receptor signaling pathway;GO:0007165 signal transduction;GO:0023052 signaling		G-protein coupled receptors/GPCRs excl olfactory receptors	Cell Junctions(Approved)	Niacin (G-protein coupled receptor activity)			0.0	0.0	0.0	0.0	0.0	0.0	0.0	0.0	0.0	0.0	0.0	0.0	0.0	0.0	0.0	0.0	0.0	0.0	0.0	0.0
HCG27	253018	symbol	H. sapiens	253018	H. sapiens	HCG27	HLA complex group 27								0.0	0.0	0.0	0.0	0.0	0.0	0.0	0.0	0.0	0.0	0.0	0.0	0.0	0.0	0.0	0.0	0.0	0.0	0.0	0.0
HCK	3055	symbol	H. sapiens	3055	H. sapiens	HCK	HCK proto-oncogene, Src family tyrosine kinase	GO:0002522 leukocyte migration involved in immune response;GO:0045728 respiratory burst after phagocytosis;GO:0038096 Fc-gamma receptor signaling pathway involved in phagocytosis	Tyr protein kinase family	Enzymes/{ENZYME proteins/Transferases,Kinases/Tyr protein kinases}	Nucleoplasm;Plasma membrane(Approved)	1-Ter-Butyl-3-P-Tolyl-1h-Pyrazolo[3,4-D]Pyrimidin-4-Ylamine (Receptor binding);Phosphonotyrosine (Receptor binding);Quercetin (Receptor binding);Bosutinib (Receptor binding)	(M33)PID GLYPICAN 1PATHWAY; (M252)PID IL8 CXCR1 PATHWAY; (M257)PID EPHRINB REV PATHWAY		1.0	1.0	0.0	0.0	1.0	0.0	1.0	1.0	1.0	0.0	0.0	0.0	0.0	1.0	0.0	0.0	0.0	0.0	0.0	0.0
HCLS1	3059	symbol	H. sapiens	3059	H. sapiens	HCLS1	hematopoietic cell-specific Lyn substrate 1	GO:0030854 positive regulation of granulocyte differentiation;GO:0061003 positive regulation of dendritic spine morphogenesis;GO:0045651 positive regulation of macrophage differentiation			Cytosol;Plasma membrane(Supported)		(M7)PID FCER1 PATHWAY	(M5898)HALLMARK DNA REPAIR; (M5950)HALLMARK ALLOGRAFT REJECTION	0.0	0.0	1.0	1.0	0.0	0.0	0.0	0.0	0.0	0.0	0.0	0.0	0.0	0.0	0.0	0.0	0.0	0.0	1.0	0.0
HDAC10	83933	symbol	H. sapiens	83933	H. sapiens	HDAC10	histone deacetylase 10	GO:0106048 spermidine deacetylation;GO:0032425 positive regulation of mismatch repair;GO:0106047 polyamine deacetylation		Enzymes/ENZYME proteins/Hydrolases	Nucleoli fibrillar center(Approved)		(M30)PID HDAC CLASSII PATHWAY; (M101)PID HDAC CLASSI PATHWAY		0.0	0.0	0.0	0.0	0.0	0.0	0.0	0.0	0.0	0.0	0.0	0.0	0.0	0.0	0.0	0.0	0.0	0.0	0.0	0.0
HDAC7	51564	symbol	H. sapiens	51564	H. sapiens	HDAC7	histone deacetylase 7	GO:0090050 positive regulation of cell migration involved in sprouting angiogenesis;GO:0090049 regulation of cell migration involved in sprouting angiogenesis;GO:1903672 positive regulation of sprouting angiogenesis		Enzymes/ENZYME proteins/Hydrolases	Cytosol(Supported)	7-[4-(Dimethylamino)Phenyl]-N-Hydroxy-4,6-Dimethyl-7-Oxo-2,4-Heptadienamide (Transcription corepressor activity)	(M30)PID HDAC CLASSII PATHWAY; (M151)PID AR TF PATHWAY; (M101)PID HDAC CLASSI PATHWAY		0.0	0.0	0.0	1.0	1.0	0.0	0.0	0.0	0.0	0.0	0.0	0.0	0.0	0.0	0.0	0.0	0.0	0.0	1.0	0.0
HELB	92797	symbol	H. sapiens	92797	H. sapiens	HELB	DNA helicase B	GO:1903775 regulation of DNA double-strand break processing;GO:2000042 negative regulation of double-strand break repair via homologous recombination;GO:2000780 negative regulation of double-strand break repair		Enzymes/ENZYME proteins/Hydrolases					0.0	0.0	0.0	0.0	0.0	0.0	0.0	0.0	0.0	0.0	0.0	0.0	0.0	0.0	0.0	0.0	0.0	0.0	0.0	0.0
HEPH	9843	symbol	H. sapiens	9843	H. sapiens	HEPH	hephaestin	GO:0006879 cellular iron ion homeostasis;GO:0006825 copper ion transport;GO:0055072 iron ion homeostasis							0.0	0.0	0.0	0.0	0.0	0.0	0.0	0.0	0.0	0.0	0.0	0.0	0.0	0.0	0.0	0.0	0.0	0.0	0.0	0.0
HEXA	3073	symbol	H. sapiens	3073	H. sapiens	HEXA	hexosaminidase subunit alpha	GO:0042340 keratan sulfate catabolic process;GO:0030207 chondroitin sulfate catabolic process;GO:0030214 hyaluronan catabolic process		Enzymes/ENZYME proteins/Hydrolases				(M5891)HALLMARK HYPOXIA	0.0	0.0	0.0	0.0	0.0	0.0	0.0	0.0	0.0	0.0	0.0	0.0	0.0	0.0	0.0	0.0	0.0	0.0	0.0	0.0
HEXB	3074	symbol	H. sapiens	3074	H. sapiens	HEXB	hexosaminidase subunit beta	GO:0006689 ganglioside catabolic process;GO:0042340 keratan sulfate catabolic process;GO:0030207 chondroitin sulfate catabolic process		Enzymes/ENZYME proteins/Hydrolases		2-Acetamido-2-Deoxy-D-Glucono-1,5-Lactone (Protein homodimerization activity);3ar,5r,6s,7r,7ar-5-Hydroxymethyl-2-Methyl-5,6,7,7a-Tetrahydro-3ah-Pyrano[3,2-D]Thiazole-6,7-Diol (Protein homodimerization activity);(2r,3r,4s,5r)-2-Acetamido-3,4-Dihydroxy-5-Hydroxymethyl-Piperidinium (Protein homodimerization activity)			1.0	0.0	0.0	0.0	0.0	0.0	0.0	0.0	0.0	0.0	0.0	0.0	0.0	0.0	0.0	0.0	0.0	0.0	0.0	0.0
HGSNAT	138050	symbol	H. sapiens	138050	H. sapiens	HGSNAT	heparan-alpha-glucosaminide N-acetyltransferase	GO:0043312 neutrophil degranulation;GO:0006027 glycosaminoglycan catabolic process;GO:0002283 neutrophil activation involved in immune response		Enzymes/ENZYME proteins/Transferases					1.0	0.0	0.0	0.0	0.0	0.0	0.0	0.0	0.0	0.0	0.0	0.0	0.0	0.0	0.0	0.0	0.0	0.0	0.0	0.0
HHEX	3087	symbol	H. sapiens	3087	H. sapiens	HHEX	hematopoietically expressed homeobox	GO:0010621 negative regulation of transcription by transcription factor localization;GO:0016973 poly(A)+ mRNA export from nucleus;GO:0045736 negative regulation of cyclin-dependent protein serine/threonine kinase activity		Transcription factors/Helix-turn-helix domains	Mitochondria;Nucleoplasm(Approved)			(M5938)HALLMARK REACTIVE OXIGEN SPECIES PATHWAY	0.0	0.0	1.0	0.0	0.0	0.0	0.0	0.0	0.0	0.0	0.0	0.0	0.0	0.0	0.0	0.0	0.0	0.0	0.0	1.0
HIC1	3090	symbol	H. sapiens	3090	H. sapiens	HIC1	HIC ZBTB transcriptional repressor 1	GO:0043517 positive regulation of DNA damage response, signal transduction by p53 class mediator;GO:1901798 positive regulation of signal transduction by p53 class mediator;GO:0043516 regulation of DNA damage response, signal transduction by p53 class mediator		Transcription factors/Zinc-coordinating DNA-binding domains	Cytosol;Nucleoplasm(Supported)		(M40)PID E2F PATHWAY; (M145)PID P53 DOWNSTREAM PATHWAY		0.0	0.0	0.0	0.0	0.0	0.0	0.0	0.0	0.0	0.0	0.0	0.0	0.0	0.0	0.0	0.0	0.0	0.0	0.0	0.0
HIVEP3	59269	symbol	H. sapiens	59269	H. sapiens	HIVEP3	HIVEP zinc finger 3	GO:0035914 skeletal muscle cell differentiation;GO:0007519 skeletal muscle tissue development;GO:0060538 skeletal muscle organ development		Transcription factors/Zinc-coordinating DNA-binding domains	Nucleoplasm(Supported)				0.0	0.0	0.0	0.0	0.0	0.0	0.0	0.0	0.0	0.0	0.0	0.0	0.0	0.0	0.0	0.0	0.0	0.0	0.0	0.0
HK3	3101	symbol	H. sapiens	3101	H. sapiens	HK3	hexokinase 3	GO:0061621 canonical glycolysis;GO:0061620 glycolytic process through glucose-6-phosphate;GO:0061615 glycolytic process through fructose-6-phosphate		Enzymes/ENZYME proteins/Transferases					1.0	0.0	0.0	0.0	0.0	0.0	0.0	0.0	0.0	0.0	0.0	0.0	0.0	0.0	0.0	0.0	0.0	0.0	0.0	0.0
HKDC1	80201	symbol	H. sapiens	80201	H. sapiens	HKDC1	hexokinase domain containing 1	GO:0006096 glycolytic process;GO:0006757 ATP generation from ADP;GO:0006754 ATP biosynthetic process		Enzymes/ENZYME proteins/Transferases	Mitochondria(Enhanced)			(M5953)HALLMARK KRAS SIGNALING UP	0.0	0.0	0.0	0.0	0.0	0.0	0.0	0.0	0.0	0.0	0.0	0.0	0.0	0.0	0.0	0.0	0.0	0.0	0.0	0.0
HLA-DMA	3108	symbol	H. sapiens	3108	H. sapiens	HLA-DMA	major histocompatibility complex, class II, DM alpha	GO:0002503 peptide antigen assembly with MHC class II protein complex;GO:0002399 MHC class II protein complex assembly;GO:0002501 peptide antigen assembly with MHC protein complex			Vesicles(Approved)			(M5950)HALLMARK ALLOGRAFT REJECTION; (M5913)HALLMARK INTERFERON GAMMA RESPONSE	0.0	0.0	0.0	0.0	0.0	1.0	0.0	0.0	0.0	0.0	0.0	0.0	1.0	0.0	0.0	0.0	0.0	0.0	0.0	0.0
HLA-DMB	3109	symbol	H. sapiens	3109	H. sapiens	HLA-DMB	major histocompatibility complex, class II, DM beta	GO:2001190 positive regulation of T cell activation via T cell receptor contact with antigen bound to MHC molecule on antigen presenting cell;GO:2001188 regulation of T cell activation via T cell receptor contact with antigen bound to MHC molecule on antigen presenting cell;GO:0002503 peptide antigen assembly with MHC class II protein complex						(M5950)HALLMARK ALLOGRAFT REJECTION	1.0	0.0	1.0	0.0	0.0	1.0	0.0	0.0	0.0	1.0	0.0	0.0	1.0	0.0	1.0	0.0	0.0	0.0	0.0	0.0
HLA-DOA	3111	symbol	H. sapiens	3111	H. sapiens	HLA-DOA	major histocompatibility complex, class II, DO alpha	GO:0002587 negative regulation of antigen processing and presentation of peptide antigen via MHC class II;GO:0002581 negative regulation of antigen processing and presentation of peptide or polysaccharide antigen via MHC class II;GO:0002586 regulation of antigen processing and presentation of peptide antigen via MHC class II						(M5950)HALLMARK ALLOGRAFT REJECTION	0.0	0.0	1.0	0.0	0.0	1.0	0.0	0.0	0.0	0.0	1.0	0.0	1.0	0.0	1.0	0.0	0.0	0.0	0.0	0.0
HLA-DOB	3112	symbol	H. sapiens	3112	H. sapiens	HLA-DOB	major histocompatibility complex, class II, DO beta	GO:0002587 negative regulation of antigen processing and presentation of peptide antigen via MHC class II;GO:0002581 negative regulation of antigen processing and presentation of peptide or polysaccharide antigen via MHC class II;GO:0002586 regulation of antigen processing and presentation of peptide antigen via MHC class II						(M5950)HALLMARK ALLOGRAFT REJECTION	0.0	0.0	0.0	0.0	0.0	1.0	0.0	0.0	0.0	0.0	1.0	0.0	1.0	0.0	1.0	0.0	0.0	0.0	0.0	0.0
HLA-DPA1	3113	symbol	H. sapiens	3113	H. sapiens	HLA-DPA1	major histocompatibility complex, class II, DP alpha 1	GO:0042102 positive regulation of T cell proliferation;GO:0019886 antigen processing and presentation of exogenous peptide antigen via MHC class II;GO:0050852 T cell receptor signaling pathway			Vesicles(Supported)				0.0	1.0	1.0	1.0	0.0	1.0	1.0	0.0	0.0	0.0	0.0	0.0	1.0	0.0	1.0	0.0	0.0	0.0	0.0	0.0
HLA-DPB1	3115	symbol	H. sapiens	3115	H. sapiens	HLA-DPB1	major histocompatibility complex, class II, DP beta 1	GO:0042102 positive regulation of T cell proliferation;GO:0019886 antigen processing and presentation of exogenous peptide antigen via MHC class II;GO:0050852 T cell receptor signaling pathway			Cell Junctions(Supported)Nucleus(Approved)				0.0	1.0	1.0	1.0	0.0	1.0	1.0	0.0	0.0	0.0	0.0	0.0	1.0	0.0	1.0	0.0	0.0	0.0	0.0	0.0
HLA-DQA1	3117	symbol	H. sapiens	3117	H. sapiens	HLA-DQA1	major histocompatibility complex, class II, DQ alpha 1	GO:0019886 antigen processing and presentation of exogenous peptide antigen via MHC class II;GO:0050852 T cell receptor signaling pathway;GO:0060333 interferon-gamma-mediated signaling pathway						(M5950)HALLMARK ALLOGRAFT REJECTION; (M5913)HALLMARK INTERFERON GAMMA RESPONSE	0.0	1.0	0.0	0.0	0.0	1.0	1.0	0.0	0.0	0.0	0.0	0.0	1.0	0.0	1.0	0.0	0.0	0.0	0.0	0.0
HLA-DQB1	3119	symbol	H. sapiens	3119	H. sapiens	HLA-DQB1	major histocompatibility complex, class II, DQ beta 1	GO:0019886 antigen processing and presentation of exogenous peptide antigen via MHC class II;GO:0002381 immunoglobulin production involved in immunoglobulin mediated immune response;GO:0050852 T cell receptor signaling pathway			Rods & Rings(Supported)Golgi apparatus(Approved)	Insulin Pork (Peptide antigen binding)			0.0	1.0	0.0	0.0	0.0	1.0	1.0	0.0	0.0	0.0	0.0	0.0	1.0	0.0	1.0	0.0	0.0	0.0	0.0	0.0
HLA-DRA	3122	symbol	H. sapiens	3122	H. sapiens	HLA-DRA	major histocompatibility complex, class II, DR alpha	GO:0002503 peptide antigen assembly with MHC class II protein complex;GO:0002399 MHC class II protein complex assembly;GO:0002501 peptide antigen assembly with MHC protein complex					(M290)PID IL12 STAT4 PATHWAY; (M54)PID IL12 2PATHWAY; (M34)PID TCR PATHWAY	(M5950)HALLMARK ALLOGRAFT REJECTION	0.0	1.0	0.0	0.0	0.0	1.0	1.0	0.0	0.0	0.0	0.0	0.0	1.0	0.0	1.0	0.0	0.0	0.0	0.0	0.0
HLA-DRB1	3123	symbol	H. sapiens	3123	H. sapiens	HLA-DRB1	major histocompatibility complex, class II, DR beta 1	GO:0019886 antigen processing and presentation of exogenous peptide antigen via MHC class II;GO:0050852 T cell receptor signaling pathway;GO:0060333 interferon-gamma-mediated signaling pathway					(M290)PID IL12 STAT4 PATHWAY; (M54)PID IL12 2PATHWAY; (M34)PID TCR PATHWAY	(M5913)HALLMARK INTERFERON GAMMA RESPONSE	0.0	1.0	0.0	0.0	0.0	1.0	1.0	0.0	0.0	0.0	0.0	0.0	1.0	0.0	1.0	0.0	0.0	0.0	0.0	0.0
HLA-DRB5	3127	symbol	H. sapiens	3127	H. sapiens	HLA-DRB5	major histocompatibility complex, class II, DR beta 5	GO:0019886 antigen processing and presentation of exogenous peptide antigen via MHC class II;GO:0050852 T cell receptor signaling pathway;GO:0060333 interferon-gamma-mediated signaling pathway							0.0	1.0	0.0	0.0	0.0	1.0	1.0	0.0	0.0	0.0	0.0	0.0	1.0	0.0	1.0	0.0	0.0	0.0	0.0	0.0
HLA-E	3133	symbol	H. sapiens	3133	H. sapiens	HLA-E	major histocompatibility complex, class I, E	GO:0001815 positive regulation of antibody-dependent cellular cytotoxicity;GO:0001813 regulation of antibody-dependent cellular cytotoxicity;GO:0001798 positive regulation of type IIa hypersensitivity			Vesicles(Approved)			(M5950)HALLMARK ALLOGRAFT REJECTION	1.0	1.0	1.0	1.0	0.0	1.0	0.0	1.0	1.0	1.0	1.0	0.0	1.0	1.0	1.0	0.0	0.0	0.0	0.0	0.0
HLA-F	3134	symbol	H. sapiens	3134	H. sapiens	HLA-F	major histocompatibility complex, class I, F	GO:0043322 negative regulation of natural killer cell degranulation;GO:0043323 positive regulation of natural killer cell degranulation;GO:0002728 negative regulation of natural killer cell cytokine production						(M5941)HALLMARK UV RESPONSE UP	1.0	1.0	1.0	1.0	0.0	1.0	0.0	0.0	1.0	1.0	1.0	0.0	1.0	0.0	1.0	0.0	0.0	0.0	0.0	0.0
HLX	3142	symbol	H. sapiens	3142	H. sapiens	HLX	H2.0 like homeobox	GO:0045629 negative regulation of T-helper 2 cell differentiation;GO:0045627 positive regulation of T-helper 1 cell differentiation;GO:0045625 regulation of T-helper 1 cell differentiation		Transcription factors/Helix-turn-helix domains	Cytosol;Nucleoplasm(Approved)		(M54)PID IL12 2PATHWAY		1.0	0.0	1.0	0.0	0.0	1.0	0.0	0.0	0.0	1.0	1.0	0.0	0.0	0.0	0.0	0.0	0.0	0.0	1.0	0.0
HMHA1	23526	gene_synonym	H. sapiens	23526	H. sapiens	ARHGAP45	Rho GTPase activating protein 45	GO:0043312 neutrophil degranulation;GO:0002283 neutrophil activation involved in immune response;GO:0042119 neutrophil activation							1.0	0.0	0.0	0.0	0.0	0.0	0.0	0.0	0.0	0.0	0.0	0.0	0.0	0.0	0.0	0.0	0.0	0.0	0.0	0.0
HMOX1	3162	symbol	H. sapiens	3162	H. sapiens	HMOX1	heme oxygenase 1	GO:0032764 negative regulation of mast cell cytokine production;GO:0043305 negative regulation of mast cell degranulation;GO:1903589 positive regulation of blood vessel endothelial cell proliferation involved in sprouting angiogenesis		Enzymes/ENZYME proteins/Oxidoreductases	Golgi apparatus;Plasma membrane(Uncertain)	NADH (Signal transducer activity);Formic Acid (Signal transducer activity);Biliverdine Ix Alpha (Signal transducer activity);12-Phenylheme (Signal transducer activity);2-Phenylheme (Signal transducer activity);Verdoheme (Signal transducer activity);Stannsoporfin (Signal transducer activity);1-({2-[2-(4-CHLOROPHENYL)ETHYL]-1,3-DIOXOLAN-2-YL}METHYL)-1H-IMIDAZOLE (Signal transducer activity);1-(adam…	(M65)PID FRA PATHWAY; (M255)PID HIF1 TFPATHWAY	(M5897)HALLMARK IL6 JAK STAT3 SIGNALING; (M5941)HALLMARK UV RESPONSE UP; (M5902)HALLMARK APOPTOSIS	1.0	1.0	1.0	1.0	1.0	1.0	0.0	0.0	0.0	0.0	1.0	0.0	0.0	0.0	0.0	0.0	1.0	0.0	0.0	1.0
HOXB6	3216	symbol	H. sapiens	3216	H. sapiens	HOXB6	homeobox B6	GO:0048704 embryonic skeletal system morphogenesis;GO:0034101 erythrocyte homeostasis;GO:0048706 embryonic skeletal system development		Transcription factors/Helix-turn-helix domains	Golgi apparatus;Nucleus(Approved)				0.0	0.0	0.0	0.0	0.0	0.0	0.0	0.0	0.0	0.0	0.0	0.0	0.0	0.0	0.0	0.0	0.0	0.0	0.0	0.0
HP	3240	symbol	H. sapiens	3240	H. sapiens	HP	haptoglobin	GO:2000296 negative regulation of hydrogen peroxide catabolic process;GO:2000295 regulation of hydrogen peroxide catabolic process;GO:0010727 negative regulation of hydrogen peroxide metabolic process		Enzymes/Peptidases/Serine-type peptidases	Vesicles(Approved)				1.0	0.0	0.0	0.0	0.0	0.0	0.0	1.0	0.0	0.0	0.0	0.0	0.0	0.0	0.0	0.0	0.0	0.0	0.0	0.0
HRH1	3269	symbol	H. sapiens	3269	H. sapiens	HRH1	histamine receptor H1	GO:0032962 positive regulation of inositol trisphosphate biosynthetic process;GO:0032960 regulation of inositol trisphosphate biosynthetic process;GO:0060732 positive regulation of inositol phosphate biosynthetic process		G-protein coupled receptors/GPCRs excl olfactory receptors	Plasma membrane(Supported)Cytosol(Approved)	Citalopram (Histamine receptor activity);Benzatropine (Histamine receptor activity);Ziprasidone (Histamine receptor activity);Clemastine (Histamine receptor activity);Amitriptyline (Histamine receptor activity);Olanzapine (Histamine receptor activity);Cetirizine (Histamine receptor activity);Terfenadine (Histamine receptor activity);Buclizine (Histamine receptor activity);Clozapine (Histamine rec…		(M5932)HALLMARK INFLAMMATORY RESPONSE	0.0	0.0	0.0	0.0	1.0	0.0	0.0	0.0	0.0	0.0	0.0	0.0	0.0	0.0	0.0	0.0	0.0	0.0	0.0	0.0
HRH2	3274	symbol	H. sapiens	3274	H. sapiens	HRH2	histamine receptor H2	GO:0001697 histamine-induced gastric acid secretion;GO:0001698 gastrin-induced gastric acid secretion;GO:0045907 positive regulation of vasoconstriction		G-protein coupled receptors/GPCRs excl olfactory receptors		Betazole (Histamine receptor activity);Amitriptyline (Histamine receptor activity);Olanzapine (Histamine receptor activity);Loxapine (Histamine receptor activity);Cimetidine (Histamine receptor activity);Nizatidine (Histamine receptor activity);Histamine Phosphate (Histamine receptor activity);Epinastine (Histamine receptor activity);Tolazoline (Histamine receptor activity);Ranitidine (Histamine …			0.0	0.0	0.0	0.0	0.0	0.0	0.0	0.0	0.0	0.0	0.0	0.0	0.0	0.0	0.0	0.0	0.0	0.0	0.0	0.0
HSD3B7	80270	symbol	H. sapiens	80270	H. sapiens	HSD3B7	hydroxy-delta-5-steroid dehydrogenase, 3 beta- and steroid delta-isomerase 7	GO:0035754 B cell chemotaxis;GO:0006699 bile acid biosynthetic process;GO:0048247 lymphocyte chemotaxis		Enzymes/ENZYME proteins/Oxidoreductases	Lipid droplets(Supported)			(M5949)HALLMARK PEROXISOME; (M5948)HALLMARK BILE ACID METABOLISM	0.0	0.0	0.0	0.0	1.0	0.0	0.0	0.0	0.0	0.0	0.0	0.0	0.0	0.0	0.0	0.0	0.0	0.0	0.0	0.0
HSF4	3299	symbol	H. sapiens	3299	H. sapiens	HSF4	heat shock transcription factor 4	GO:0033169 histone H3-K9 demethylation;GO:0061408 positive regulation of transcription from RNA polymerase II promoter in response to heat stress;GO:0070076 histone lysine demethylation		Transcription factors/Helix-turn-helix domains	Nuclear speckles(Supported)				0.0	0.0	0.0	0.0	0.0	0.0	0.0	0.0	0.0	0.0	0.0	0.0	0.0	0.0	0.0	0.0	0.0	0.0	0.0	0.0
HSPA6	3310	symbol	H. sapiens	3310	H. sapiens	HSPA6	heat shock protein family A (Hsp70) member 6	GO:0070370 cellular heat acclimation;GO:0010286 heat acclimation;GO:0043312 neutrophil degranulation			Nucleoplasm;Vesicles(Approved)				1.0	0.0	0.0	0.0	0.0	0.0	0.0	0.0	0.0	0.0	0.0	0.0	1.0	0.0	0.0	0.0	0.0	0.0	0.0	0.0
HTR7	3363	symbol	H. sapiens	3363	H. sapiens	HTR7	5-hydroxytryptamine receptor 7	GO:0042310 vasoconstriction;GO:0097756 negative regulation of blood vessel diameter;GO:0098664 G protein-coupled serotonin receptor signaling pathway		G-protein coupled receptors/{GPCRs excl olfactory receptors,Serotonin receptors};RAS pathway related proteins	Plasma membrane(Supported)Cytosol;Nuclear speckles(Approved)	Eletriptan (Serotonin receptor activity);Ziprasidone (Serotonin receptor activity);Methysergide (Serotonin receptor activity);Cabergoline (Serotonin receptor activity);Amitriptyline (Serotonin receptor activity);Olanzapine (Serotonin receptor activity);Clozapine (Serotonin receptor activity);Mirtazapine (Serotonin receptor activity);Loxapine (Serotonin receptor activity);Imipramine (Serotonin rec…		(M5941)HALLMARK UV RESPONSE UP	0.0	0.0	0.0	0.0	0.0	0.0	0.0	0.0	0.0	0.0	0.0	0.0	0.0	0.0	0.0	0.0	0.0	0.0	0.0	0.0
HTRA4	203100	symbol	H. sapiens	203100	H. sapiens	HTRA4	HtrA serine peptidase 4	GO:0030512 negative regulation of transforming growth factor beta receptor signaling pathway;GO:1903845 negative regulation of cellular response to transforming growth factor beta stimulus;GO:0017015 regulation of transforming growth factor beta receptor signaling pathway		Enzymes/Peptidases/Serine-type peptidases			(M3468)NABA ECM REGULATORS; (M5885)NABA MATRISOME ASSOCIATED; (M5889)NABA MATRISOME		0.0	0.0	0.0	0.0	0.0	0.0	0.0	0.0	0.0	0.0	0.0	0.0	0.0	0.0	0.0	1.0	0.0	0.0	0.0	0.0
IBSP	3381	symbol	H. sapiens	3381	H. sapiens	IBSP	integrin binding sialoprotein	GO:0030282 bone mineralization;GO:0031214 biomineral tissue development;GO:0001649 osteoblast differentiation					(M53)PID INTEGRIN3 PATHWAY; (M3008)NABA ECM GLYCOPROTEINS; (M5884)NABA CORE MATRISOME		0.0	0.0	1.0	0.0	0.0	0.0	0.0	0.0	0.0	0.0	0.0	1.0	0.0	0.0	0.0	0.0	0.0	0.0	0.0	0.0
ICAM1	3383	symbol	H. sapiens	3383	H. sapiens	ICAM1	intercellular adhesion molecule 1	GO:0097368 establishment of Sertoli cell barrier;GO:0046813 receptor-mediated virion attachment to host cell;GO:0060009 Sertoli cell development		CD markers	Cytosol;Plasma membrane(Uncertain)	Natalizumab (Virus receptor activity);Hyaluronic acid (Virus receptor activity)	(M169)PID INTEGRIN2 PATHWAY; (M159)PID AMB2 NEUTROPHILS PATHWAY; (M99)PID TXA2PATHWAY	(M5941)HALLMARK UV RESPONSE UP; (M5932)HALLMARK INFLAMMATORY RESPONSE; (M5913)HALLMARK INTERFERON GAMMA RESPONSE	1.0	1.0	1.0	0.0	1.0	1.0	0.0	1.0	0.0	1.0	0.0	1.0	1.0	0.0	1.0	0.0	1.0	1.0	0.0	0.0
ICAM3	3385	symbol	H. sapiens	3385	H. sapiens	ICAM3	intercellular adhesion molecule 3	GO:0002223 stimulatory C-type lectin receptor signaling pathway;GO:0002220 innate immune response activating cell surface receptor signaling pathway;GO:0002758 innate immune response-activating signal transduction		CD markers	Mitochondria;Nuclear membrane;Nucleus(Approved)		(M169)PID INTEGRIN2 PATHWAY		0.0	0.0	0.0	0.0	0.0	0.0	1.0	0.0	1.0	0.0	0.0	1.0	1.0	0.0	1.0	0.0	0.0	0.0	0.0	0.0
ICOS	29851	symbol	H. sapiens	29851	H. sapiens	ICOS	inducible T cell costimulator	GO:0031295 T cell costimulation;GO:0002517 T cell tolerance induction;GO:0031294 lymphocyte costimulation		CD markers				(M5947)HALLMARK IL2 STAT5 SIGNALING	0.0	0.0	1.0	0.0	0.0	0.0	0.0	0.0	0.0	0.0	0.0	0.0	1.0	0.0	1.0	0.0	0.0	0.0	0.0	0.0
ICOSLG	23308	symbol	H. sapiens	23308	H. sapiens	ICOSLG	inducible T cell costimulator ligand	GO:0042104 positive regulation of activated T cell proliferation;GO:0031295 T cell costimulation;GO:0046006 regulation of activated T cell proliferation		CD markers	Plasma membrane(Supported)Cytoplasmic bodies(Approved)			(M5932)HALLMARK INFLAMMATORY RESPONSE; (M5890)HALLMARK TNFA SIGNALING VIA NFKB; (M5950)HALLMARK ALLOGRAFT REJECTION	0.0	0.0	1.0	1.0	0.0	1.0	1.0	0.0	0.0	0.0	0.0	0.0	1.0	0.0	1.0	0.0	0.0	0.0	0.0	0.0
IDUA	3425	symbol	H. sapiens	3425	H. sapiens	IDUA	alpha-L-iduronidase	GO:0030209 dermatan sulfate catabolic process;GO:0030211 heparin catabolic process;GO:0030207 chondroitin sulfate catabolic process		Enzymes/ENZYME proteins/Hydrolases	Vesicles(Supported)			(M5956)HALLMARK KRAS SIGNALING DN; (M5937)HALLMARK GLYCOLYSIS	0.0	0.0	0.0	0.0	0.0	0.0	0.0	0.0	0.0	0.0	0.0	0.0	0.0	0.0	0.0	0.0	0.0	0.0	0.0	0.0
IER3	8870	symbol	H. sapiens	8870	H. sapiens	IER3	immediate early response 3	GO:0014066 regulation of phosphatidylinositol 3-kinase signaling;GO:0014065 phosphatidylinositol 3-kinase signaling;GO:0048015 phosphatidylinositol-mediated signaling						(M5902)HALLMARK APOPTOSIS; (M5891)HALLMARK HYPOXIA; (M5937)HALLMARK GLYCOLYSIS	0.0	0.0	0.0	0.0	0.0	0.0	0.0	0.0	0.0	0.0	0.0	0.0	0.0	0.0	0.0	0.0	0.0	0.0	0.0	0.0
IFFO1	25900	symbol	H. sapiens	25900	H. sapiens	IFFO1	intermediate filament family orphan 1								0.0	0.0	0.0	0.0	0.0	0.0	0.0	0.0	0.0	0.0	0.0	0.0	0.0	0.0	0.0	0.0	0.0	0.0	0.0	0.0
IFI30	10437	symbol	H. sapiens	10437	H. sapiens	IFI30	IFI30 lysosomal thiol reductase	GO:0042590 antigen processing and presentation of exogenous peptide antigen via MHC class I;GO:0019886 antigen processing and presentation of exogenous peptide antigen via MHC class II;GO:0060333 interferon-gamma-mediated signaling pathway			Vesicles(Supported)Cytosol(Uncertain)			(M5911)HALLMARK INTERFERON ALPHA RESPONSE; (M5939)HALLMARK P53 PATHWAY; (M5913)HALLMARK INTERFERON GAMMA RESPONSE	0.0	1.0	0.0	0.0	0.0	0.0	0.0	0.0	0.0	0.0	0.0	0.0	1.0	0.0	1.0	0.0	0.0	0.0	0.0	0.0
IGFBP6	3489	symbol	H. sapiens	3489	H. sapiens	IGFBP6	insulin like growth factor binding protein 6	GO:0043567 regulation of insulin-like growth factor receptor signaling pathway;GO:0048009 insulin-like growth factor receptor signaling pathway;GO:0090090 negative regulation of canonical Wnt signaling pathway					(M3008)NABA ECM GLYCOPROTEINS; (M5884)NABA CORE MATRISOME; (M5889)NABA MATRISOME	(M5902)HALLMARK APOPTOSIS	0.0	0.0	0.0	0.0	0.0	0.0	0.0	0.0	0.0	0.0	1.0	1.0	0.0	0.0	0.0	0.0	0.0	0.0	0.0	0.0
IKBKE	9641	symbol	H. sapiens	9641	H. sapiens	IKBKE	inhibitor of nuclear factor kappa B kinase subunit epsilon	GO:0035666 TRIF-dependent toll-like receptor signaling pathway;GO:0002756 MyD88-independent toll-like receptor signaling pathway;GO:0060340 positive regulation of type I interferon-mediated signaling pathway	Other	Enzymes/{ENZYME proteins/Transferases,Kinases}	Cytosol(Supported)				0.0	1.0	0.0	1.0	0.0	0.0	1.0	0.0	1.0	0.0	0.0	0.0	1.0	0.0	0.0	0.0	0.0	1.0	0.0	0.0
IKZF1	10320	symbol	H. sapiens	10320	H. sapiens	IKZF1	IKAROS family zinc finger 1	GO:0030218 erythrocyte differentiation;GO:0034101 erythrocyte homeostasis;GO:0030098 lymphocyte differentiation		Transcription factors/Zinc-coordinating DNA-binding domains	Nucleoplasm(Supported)		(M60)PID NFAT TFPATHWAY	(M5953)HALLMARK KRAS SIGNALING UP	0.0	0.0	1.0	0.0	0.0	0.0	0.0	0.0	0.0	0.0	0.0	0.0	0.0	0.0	0.0	0.0	0.0	0.0	1.0	0.0
IKZF3	22806	symbol	H. sapiens	22806	H. sapiens	IKZF3	IKAROS family zinc finger 3	GO:0045577 regulation of B cell differentiation;GO:0030888 regulation of B cell proliferation;GO:0030183 B cell differentiation		Transcription factors/Zinc-coordinating DNA-binding domains	Cytosol;Plasma membrane(Uncertain)		(M122)PID IL2 1PATHWAY		0.0	0.0	1.0	0.0	0.0	0.0	0.0	1.0	0.0	0.0	0.0	0.0	0.0	0.0	0.0	0.0	0.0	0.0	0.0	0.0
IL10	3586	symbol	H. sapiens	3586	H. sapiens	IL10	interleukin 10	GO:0045355 negative regulation of interferon-alpha biosynthetic process;GO:0002875 negative regulation of chronic inflammatory response to antigenic stimulus;GO:1903208 negative regulation of hydrogen peroxide-induced neuron death				AV411 (Interleukin-10 receptor binding);CRx-139 (Interleukin-10 receptor binding);LLL-3348 (Interleukin-10 receptor binding)	(M28)PID IL4 2PATHWAY; (M167)PID AP1 PATHWAY; (M2)PID SMAD2 3NUCLEAR PATHWAY	(M5947)HALLMARK IL2 STAT5 SIGNALING; (M5932)HALLMARK INFLAMMATORY RESPONSE; (M5950)HALLMARK ALLOGRAFT REJECTION	1.0	1.0	1.0	1.0	1.0	1.0	0.0	1.0	0.0	1.0	1.0	0.0	1.0	1.0	0.0	1.0	0.0	1.0	0.0	1.0
IL10RA	3587	symbol	H. sapiens	3587	H. sapiens	IL10RA	interleukin 10 receptor subunit alpha	GO:0070086 ubiquitin-dependent endocytosis;GO:0046427 positive regulation of JAK-STAT cascade;GO:0010507 negative regulation of autophagy		CD markers				(M5947)HALLMARK IL2 STAT5 SIGNALING; (M5932)HALLMARK INFLAMMATORY RESPONSE; (M5953)HALLMARK KRAS SIGNALING UP	0.0	1.0	0.0	0.0	0.0	0.0	0.0	1.0	0.0	0.0	0.0	0.0	1.0	0.0	0.0	0.0	0.0	1.0	0.0	0.0
IL10RB	3588	symbol	H. sapiens	3588	H. sapiens	IL10RB	interleukin 10 receptor subunit beta	GO:0046427 positive regulation of JAK-STAT cascade;GO:1904894 positive regulation of STAT cascade;GO:0046425 regulation of JAK-STAT cascade		CD markers	Cytosol(Approved)			(M5897)HALLMARK IL6 JAK STAT3 SIGNALING	0.0	1.0	0.0	0.0	0.0	0.0	0.0	0.0	0.0	0.0	0.0	0.0	1.0	0.0	0.0	0.0	0.0	1.0	0.0	0.0
IL12RB1	3594	symbol	H. sapiens	3594	H. sapiens	IL12RB1	interleukin 12 receptor subunit beta 1	GO:2000330 positive regulation of T-helper 17 cell lineage commitment;GO:2000328 regulation of T-helper 17 cell lineage commitment;GO:2000321 positive regulation of T-helper 17 cell differentiation		CD markers	Plasma membrane(Approved)		(M36)PID IL27 PATHWAY; (M196)PID IL23 PATHWAY; (M54)PID IL12 2PATHWAY	(M5897)HALLMARK IL6 JAK STAT3 SIGNALING; (M5950)HALLMARK ALLOGRAFT REJECTION	1.0	1.0	1.0	1.0	0.0	1.0	0.0	0.0	0.0	1.0	0.0	0.0	1.0	0.0	0.0	0.0	0.0	0.0	0.0	0.0
IL13RA1	3597	symbol	H. sapiens	3597	H. sapiens	IL13RA1	interleukin 13 receptor subunit alpha 1	GO:0019221 cytokine-mediated signaling pathway;GO:0071345 cellular response to cytokine stimulus;GO:0034097 response to cytokine		CD markers	Golgi apparatus;Nucleoplasm(Approved)		(M17580)ST IL 13 PATHWAY; (M9378)ST INTERLEUKIN 4 PATHWAY; (M28)PID IL4 2PATHWAY	(M5897)HALLMARK IL6 JAK STAT3 SIGNALING; (M5937)HALLMARK GLYCOLYSIS	0.0	1.0	0.0	0.0	0.0	0.0	0.0	0.0	0.0	0.0	0.0	0.0	0.0	0.0	0.0	0.0	0.0	0.0	0.0	0.0
IL15	3600	symbol	H. sapiens	3600	H. sapiens	IL15	interleukin 15	GO:0045062 extrathymic T cell selection;GO:1904100 positive regulation of protein O-linked glycosylation;GO:1904098 regulation of protein O-linked glycosylation			Nuclear speckles;Nucleoplasm(Supported)		(M5883)NABA SECRETED FACTORS; (M5885)NABA MATRISOME ASSOCIATED; (M5889)NABA MATRISOME	(M5911)HALLMARK INTERFERON ALPHA RESPONSE; (M5932)HALLMARK INFLAMMATORY RESPONSE; (M5913)HALLMARK INTERFERON GAMMA RESPONSE	1.0	1.0	1.0	1.0	0.0	1.0	0.0	1.0	1.0	1.0	1.0	0.0	1.0	1.0	0.0	1.0	0.0	1.0	1.0	0.0
IL15RA	3601	symbol	H. sapiens	3601	H. sapiens	IL15RA	interleukin 15 receptor subunit alpha	GO:0035723 interleukin-15-mediated signaling pathway;GO:0071350 cellular response to interleukin-15;GO:0070672 response to interleukin-15		CD markers	Cytosol;Plasma membrane(Uncertain)			(M5897)HALLMARK IL6 JAK STAT3 SIGNALING; (M5913)HALLMARK INTERFERON GAMMA RESPONSE; (M5890)HALLMARK TNFA SIGNALING VIA NFKB	0.0	1.0	0.0	0.0	0.0	0.0	0.0	0.0	0.0	0.0	0.0	0.0	1.0	0.0	0.0	0.0	0.0	0.0	0.0	0.0
IL16	3603	symbol	H. sapiens	3603	H. sapiens	IL16	interleukin 16	GO:0050930 induction of positive chemotaxis;GO:0050927 positive regulation of positive chemotaxis;GO:0050926 regulation of positive chemotaxis			Cytosol;Nuclear speckles;Plasma membrane(Approved)		(M5883)NABA SECRETED FACTORS; (M5885)NABA MATRISOME ASSOCIATED; (M5889)NABA MATRISOME	(M5950)HALLMARK ALLOGRAFT REJECTION	0.0	1.0	0.0	0.0	1.0	0.0	0.0	0.0	0.0	0.0	0.0	0.0	0.0	1.0	0.0	1.0	0.0	0.0	0.0	0.0
IL17RA	23765	symbol	H. sapiens	23765	H. sapiens	IL17RA	interleukin 17 receptor A	GO:2000667 positive regulation of interleukin-13 secretion;GO:2000664 positive regulation of interleukin-5 secretion;GO:0097400 interleukin-17-mediated signaling pathway		CD markers	Cytosol;Nucleoplasm(Approved)			(M5897)HALLMARK IL6 JAK STAT3 SIGNALING	0.0	1.0	0.0	1.0	1.0	0.0	0.0	0.0	1.0	0.0	0.0	0.0	0.0	1.0	0.0	0.0	0.0	1.0	0.0	0.0
IL18R1	8809	symbol	H. sapiens	8809	H. sapiens	IL18R1	interleukin 18 receptor 1	GO:2000556 positive regulation of T-helper 1 cell cytokine production;GO:0045063 T-helper 1 cell differentiation;GO:2000554 regulation of T-helper 1 cell cytokine production		CD markers	Mitochondria(Approved)		(M290)PID IL12 STAT4 PATHWAY; (M196)PID IL23 PATHWAY; (M54)PID IL12 2PATHWAY	(M5897)HALLMARK IL6 JAK STAT3 SIGNALING; (M5947)HALLMARK IL2 STAT5 SIGNALING; (M5932)HALLMARK INFLAMMATORY RESPONSE	1.0	1.0	1.0	1.0	0.0	1.0	0.0	0.0	0.0	1.0	0.0	0.0	1.0	0.0	0.0	0.0	0.0	1.0	0.0	0.0
IL18RAP	8807	symbol	H. sapiens	8807	H. sapiens	IL18RAP	interleukin 18 receptor accessory protein	GO:0035744 T-helper 1 cell cytokine production;GO:0035655 interleukin-18-mediated signaling pathway;GO:0045954 positive regulation of natural killer cell mediated cytotoxicity		CD markers			(M290)PID IL12 STAT4 PATHWAY; (M196)PID IL23 PATHWAY; (M54)PID IL12 2PATHWAY	(M5932)HALLMARK INFLAMMATORY RESPONSE; (M5950)HALLMARK ALLOGRAFT REJECTION	1.0	1.0	0.0	0.0	0.0	1.0	0.0	0.0	1.0	0.0	0.0	0.0	1.0	0.0	0.0	0.0	0.0	0.0	0.0	0.0
IL1A	3552	symbol	H. sapiens	3552	H. sapiens	IL1A	interleukin 1 alpha	GO:1900042 positive regulation of interleukin-2 secretion;GO:1900040 regulation of interleukin-2 secretion;GO:1904469 positive regulation of tumor necrosis factor secretion		Transporters/Accessory Factors Involved in Transport		Rilonacept (Cytokine activity)	(M110)PID IL1 PATHWAY; (M239)PID A6B1 A6B4 INTEGRIN PATHWAY; (M236)PID DELTA NP63 PATHWAY	(M5902)HALLMARK APOPTOSIS; (M5932)HALLMARK INFLAMMATORY RESPONSE; (M5939)HALLMARK P53 PATHWAY	0.0	1.0	0.0	1.0	0.0	0.0	0.0	1.0	0.0	0.0	1.0	0.0	1.0	0.0	0.0	1.0	1.0	1.0	0.0	1.0
IL1B	3553	symbol	H. sapiens	3553	H. sapiens	IL1B	interleukin 1 beta	GO:0033092 positive regulation of immature T cell proliferation in thymus;GO:0060559 positive regulation of calcidiol 1-monooxygenase activity;GO:2000556 positive regulation of T-helper 1 cell cytokine production				Minocycline (Protein domain specific binding);AV411 (Protein domain specific binding);VP025 (Protein domain specific binding);681323 (Protein domain specific binding);Gallium nitrate (Protein domain specific binding);SCIO-469 (Protein domain specific binding);Etiprednol dicloacetate (Protein domain specific binding);VX-702 (Protein domain specific binding);VX-765 (Protein domain specific binding)…	(M11736)SA MMP CYTOKINE CONNECTION; (M267)PID ANTHRAX PATHWAY; (M36)PID IL27 PATHWAY	(M5897)HALLMARK IL6 JAK STAT3 SIGNALING; (M5902)HALLMARK APOPTOSIS; (M5932)HALLMARK INFLAMMATORY RESPONSE	0.0	1.0	1.0	1.0	1.0	1.0	1.0	1.0	1.0	0.0	1.0	0.0	1.0	1.0	0.0	1.0	1.0	1.0	1.0	0.0
IL1R1	3554	symbol	H. sapiens	3554	H. sapiens	IL1R1	interleukin 1 receptor type 1	GO:2000556 positive regulation of T-helper 1 cell cytokine production;GO:2000661 positive regulation of interleukin-1-mediated signaling pathway;GO:2000554 regulation of T-helper 1 cell cytokine production		CD markers		Anakinra (Transmembrane signaling receptor activity);SD118 (Transmembrane signaling receptor activity);OMS-103HP (Transmembrane signaling receptor activity)	(M110)PID IL1 PATHWAY; (M12012)ST P38 MAPK PATHWAY; (M3721)ST JNK MAPK PATHWAY	(M5897)HALLMARK IL6 JAK STAT3 SIGNALING; (M5934)HALLMARK XENOBIOTIC METABOLISM; (M5932)HALLMARK INFLAMMATORY RESPONSE	0.0	1.0	0.0	1.0	1.0	1.0	0.0	0.0	0.0	0.0	0.0	0.0	1.0	1.0	0.0	0.0	1.0	1.0	0.0	0.0
IL1R2	7850	symbol	H. sapiens	7850	H. sapiens	IL1R2	interleukin 1 receptor type 2	GO:0050712 negative regulation of interleukin-1 alpha secretion;GO:0050705 regulation of interleukin-1 alpha secretion;GO:2000660 negative regulation of interleukin-1-mediated signaling pathway		CD markers			(M110)PID IL1 PATHWAY	(M5897)HALLMARK IL6 JAK STAT3 SIGNALING; (M5947)HALLMARK IL2 STAT5 SIGNALING	0.0	1.0	0.0	1.0	0.0	0.0	0.0	0.0	0.0	0.0	0.0	0.0	1.0	1.0	0.0	0.0	1.0	1.0	0.0	0.0
IL1RN	3557	symbol	H. sapiens	3557	H. sapiens	IL1RN	interleukin 1 receptor antagonist	GO:2000660 negative regulation of interleukin-1-mediated signaling pathway;GO:0034115 negative regulation of heterotypic cell-cell adhesion;GO:2000659 regulation of interleukin-1-mediated signaling pathway				Rilonacept (Interleukin-1, type ii receptor binding)	(M110)PID IL1 PATHWAY; (M5883)NABA SECRETED FACTORS; (M5885)NABA MATRISOME ASSOCIATED		0.0	1.0	1.0	1.0	0.0	0.0	0.0	0.0	0.0	0.0	1.0	0.0	0.0	0.0	0.0	1.0	0.0	1.0	0.0	0.0
IL21R	50615	symbol	H. sapiens	50615	H. sapiens	IL21R	interleukin 21 receptor	GO:0038114 interleukin-21-mediated signaling pathway;GO:0098757 cellular response to interleukin-21;GO:0098756 response to interleukin-21		CD markers	Cytosol;Plasma membrane(Uncertain)				0.0	1.0	1.0	0.0	0.0	0.0	0.0	0.0	0.0	0.0	0.0	0.0	1.0	0.0	0.0	0.0	0.0	0.0	0.0	0.0
IL23A	51561	symbol	H. sapiens	51561	H. sapiens	IL23A	interleukin 23 subunit alpha	GO:2000330 positive regulation of T-helper 17 cell lineage commitment;GO:2000328 regulation of T-helper 17 cell lineage commitment;GO:2000321 positive regulation of T-helper 17 cell differentiation			Cytosol(Approved)	Briakinumab	(M196)PID IL23 PATHWAY; (M166)PID ATF2 PATHWAY; (M5883)NABA SECRETED FACTORS	(M5890)HALLMARK TNFA SIGNALING VIA NFKB	1.0	1.0	1.0	1.0	1.0	1.0	0.0	1.0	1.0	1.0	0.0	0.0	1.0	1.0	0.0	1.0	0.0	0.0	1.0	0.0
IL24	11009	symbol	H. sapiens	11009	H. sapiens	IL24	interleukin 24	GO:0042531 positive regulation of tyrosine phosphorylation of STAT protein;GO:0042501 serine phosphorylation of STAT protein;GO:0071353 cellular response to interleukin-4					(M196)PID IL23 PATHWAY; (M5883)NABA SECRETED FACTORS; (M5885)NABA MATRISOME ASSOCIATED		0.0	1.0	0.0	0.0	0.0	0.0	0.0	1.0	0.0	0.0	1.0	0.0	0.0	0.0	0.0	1.0	0.0	0.0	0.0	1.0
IL27	246778	symbol	H. sapiens	246778	H. sapiens	IL27	interleukin 27	GO:0045625 regulation of T-helper 1 cell differentiation;GO:0045063 T-helper 1 cell differentiation;GO:0045622 regulation of T-helper cell differentiation					(M36)PID IL27 PATHWAY		1.0	1.0	1.0	1.0	0.0	1.0	0.0	1.0	0.0	1.0	0.0	0.0	0.0	0.0	0.0	0.0	0.0	0.0	0.0	0.0
IL2RA	3559	symbol	H. sapiens	3559	H. sapiens	IL2RA	interleukin 2 receptor subunit alpha	GO:0046013 regulation of T cell homeostatic proliferation;GO:0001777 T cell homeostatic proliferation;GO:0042104 positive regulation of activated T cell proliferation		CD markers		Denileukin diftitox (Interleukin-2 receptor activity);Aldesleukin (Interleukin-2 receptor activity);Basiliximab (Interleukin-2 receptor activity);Daclizumab (Interleukin-2 receptor activity)	(M235)PID TCR CALCIUM PATHWAY; (M234)PID IL2 STAT5 PATHWAY; (M290)PID IL12 STAT4 PATHWAY	(M5897)HALLMARK IL6 JAK STAT3 SIGNALING; (M5947)HALLMARK IL2 STAT5 SIGNALING; (M5950)HALLMARK ALLOGRAFT REJECTION	0.0	1.0	1.0	0.0	0.0	1.0	0.0	0.0	0.0	0.0	1.0	0.0	1.0	1.0	0.0	0.0	0.0	0.0	0.0	0.0
IL2RB	3560	symbol	H. sapiens	3560	H. sapiens	IL2RB	interleukin 2 receptor subunit beta	GO:0038110 interleukin-2-mediated signaling pathway;GO:0035723 interleukin-15-mediated signaling pathway;GO:0071352 cellular response to interleukin-2		CD markers		Denileukin diftitox (Interleukin-2 receptor activity);Aldesleukin (Interleukin-2 receptor activity);Basiliximab (Interleukin-2 receptor activity);Daclizumab (Interleukin-2 receptor activity)	(M234)PID IL2 STAT5 PATHWAY; (M143)PID IL2 PI3K PATHWAY; (M122)PID IL2 1PATHWAY	(M5916)HALLMARK APICAL SURFACE; (M5947)HALLMARK IL2 STAT5 SIGNALING; (M5932)HALLMARK INFLAMMATORY RESPONSE	0.0	1.0	0.0	0.0	0.0	0.0	0.0	0.0	0.0	0.0	0.0	0.0	1.0	0.0	0.0	0.0	0.0	0.0	0.0	0.0
IL2RG	3561	symbol	H. sapiens	3561	H. sapiens	IL2RG	interleukin 2 receptor subunit gamma	GO:0038114 interleukin-21-mediated signaling pathway;GO:0038113 interleukin-9-mediated signaling pathway;GO:0098757 cellular response to interleukin-21		CD markers	Vesicles(Approved)	Denileukin diftitox (Interleukin-2 binding);Aldesleukin (Interleukin-2 binding)	(M9378)ST INTERLEUKIN 4 PATHWAY; (M234)PID IL2 STAT5 PATHWAY; (M143)PID IL2 PI3K PATHWAY	(M5916)HALLMARK APICAL SURFACE; (M5897)HALLMARK IL6 JAK STAT3 SIGNALING; (M5923)HALLMARK PI3K AKT MTOR SIGNALING	0.0	1.0	0.0	0.0	0.0	0.0	0.0	0.0	0.0	0.0	0.0	0.0	1.0	0.0	0.0	0.0	0.0	0.0	0.0	0.0
IL32	9235	symbol	H. sapiens	9235	H. sapiens	IL32	interleukin 32	GO:0019221 cytokine-mediated signaling pathway;GO:0071345 cellular response to cytokine stimulus;GO:0034097 response to cytokine						(M5930)HALLMARK EPITHELIAL MESENCHYMAL TRANSITION	0.0	1.0	0.0	0.0	0.0	0.0	0.0	0.0	0.0	0.0	0.0	0.0	0.0	0.0	0.0	0.0	0.0	0.0	0.0	0.0
IL4I1	259307	symbol	H. sapiens	259307	H. sapiens	IL4I1	interleukin 4 induced 1	GO:0006559 L-phenylalanine catabolic process;GO:1902222 erythrose 4-phosphate/phosphoenolpyruvate family amino acid catabolic process;GO:0006558 L-phenylalanine metabolic process		Enzymes/ENZYME proteins/Oxidoreductases		Flavin adenine dinucleotide (L-amino-acid oxidase activity);Vinylglycine (L-amino-acid oxidase activity);2-Aminobenzoic Acid (L-amino-acid oxidase activity);Citric Acid (L-amino-acid oxidase activity)		(M5935)HALLMARK FATTY ACID METABOLISM	0.0	0.0	0.0	0.0	0.0	0.0	0.0	0.0	0.0	0.0	0.0	0.0	0.0	0.0	0.0	0.0	0.0	0.0	0.0	0.0
IL4R	3566	symbol	H. sapiens	3566	H. sapiens	IL4R	interleukin 4 receptor	GO:0045626 negative regulation of T-helper 1 cell differentiation;GO:0045630 positive regulation of T-helper 2 cell differentiation;GO:0045625 regulation of T-helper 1 cell differentiation		CD markers		AER001 (Receptor signaling protein activity)	(M17580)ST IL 13 PATHWAY; (M9378)ST INTERLEUKIN 4 PATHWAY; (M1718)SIG IL4RECEPTOR IN B LYPHOCYTES	(M5897)HALLMARK IL6 JAK STAT3 SIGNALING; (M5911)HALLMARK INTERFERON ALPHA RESPONSE; (M5947)HALLMARK IL2 STAT5 SIGNALING	1.0	1.0	1.0	1.0	0.0	1.0	0.0	0.0	0.0	1.0	1.0	0.0	1.0	0.0	0.0	0.0	0.0	0.0	1.0	0.0
IL6	3569	symbol	H. sapiens	3569	H. sapiens	IL6	interleukin 6	GO:0072540 T-helper 17 cell lineage commitment;GO:0002295 T-helper cell lineage commitment;GO:2000553 positive regulation of T-helper 2 cell cytokine production			Vesicles(Approved)	Ginseng (Interleukin-6 receptor binding);YSIL6 (Interleukin-6 receptor binding);AV411 (Interleukin-6 receptor binding);681323 (Interleukin-6 receptor binding);VX-702 (Interleukin-6 receptor binding);CRx-139 (Interleukin-6 receptor binding);HMPL-004 (Interleukin-6 receptor binding);Siltuximab (Interleukin-6 receptor binding)	(M9174)ST STAT3 PATHWAY; (M36)PID IL27 PATHWAY; (M65)PID FRA PATHWAY	(M5897)HALLMARK IL6 JAK STAT3 SIGNALING; (M5941)HALLMARK UV RESPONSE UP; (M5902)HALLMARK APOPTOSIS	1.0	1.0	1.0	1.0	1.0	1.0	0.0	1.0	1.0	1.0	1.0	1.0	1.0	1.0	0.0	1.0	0.0	1.0	1.0	1.0
IL6R	3570	symbol	H. sapiens	3570	H. sapiens	IL6R	interleukin 6 receptor	GO:0072126 positive regulation of glomerular mesangial cell proliferation;GO:0072124 regulation of glomerular mesangial cell proliferation;GO:0010536 positive regulation of activation of Janus kinase activity		CD markers		Tocilizumab (Protein homodimerization activity)	(M9174)ST STAT3 PATHWAY; (M11736)SA MMP CYTOKINE CONNECTION; (M183)PID IL6 7 PATHWAY		0.0	1.0	0.0	1.0	1.0	0.0	0.0	1.0	0.0	0.0	0.0	0.0	1.0	1.0	0.0	0.0	0.0	0.0	0.0	0.0
IL7R	3575	symbol	H. sapiens	3575	H. sapiens	IL7R	interleukin 7 receptor	GO:0001915 negative regulation of T cell mediated cytotoxicity;GO:0033089 positive regulation of T cell differentiation in thymus;GO:0070233 negative regulation of T cell apoptotic process		CD markers	Plasma membrane(Supported)Microtubule organizing center(Uncertain)			(M5932)HALLMARK INFLAMMATORY RESPONSE; (M5953)HALLMARK KRAS SIGNALING UP; (M5890)HALLMARK TNFA SIGNALING VIA NFKB	0.0	1.0	1.0	0.0	0.0	1.0	0.0	0.0	0.0	0.0	1.0	0.0	1.0	0.0	0.0	0.0	0.0	0.0	0.0	0.0
ILDR1	286676	symbol	H. sapiens	286676	H. sapiens	ILDR1	immunoglobulin like domain containing receptor 1	GO:0090277 positive regulation of peptide hormone secretion;GO:0046887 positive regulation of hormone secretion;GO:0090276 regulation of peptide hormone secretion							0.0	0.0	0.0	1.0	0.0	0.0	0.0	0.0	0.0	0.0	0.0	0.0	0.0	0.0	0.0	0.0	0.0	0.0	0.0	0.0
INPP5D	3635	symbol	H. sapiens	3635	H. sapiens	INPP5D	inositol polyphosphate-5-phosphatase D	GO:0045659 negative regulation of neutrophil differentiation;GO:0045658 regulation of neutrophil differentiation;GO:0045656 negative regulation of monocyte differentiation		Enzymes/ENZYME proteins/Hydrolases	Cytosol(Approved)		(M9378)ST INTERLEUKIN 4 PATHWAY; (M182)PID IL3 PATHWAY; (M233)PID EPO PATHWAY		0.0	1.0	1.0	1.0	1.0	1.0	1.0	0.0	0.0	0.0	1.0	0.0	1.0	0.0	1.0	0.0	0.0	0.0	1.0	1.0
INSL3	3640	symbol	H. sapiens	3640	H. sapiens	INSL3	insulin like 3	GO:0090303 positive regulation of wound healing;GO:0010634 positive regulation of epithelial cell migration;GO:0007193 adenylate cyclase-inhibiting G protein-coupled receptor signaling pathway					(M5883)NABA SECRETED FACTORS; (M5885)NABA MATRISOME ASSOCIATED; (M5889)NABA MATRISOME		0.0	0.0	0.0	0.0	1.0	0.0	0.0	0.0	0.0	0.0	0.0	0.0	0.0	0.0	0.0	1.0	0.0	0.0	0.0	1.0
INSL5	10022	symbol	H. sapiens	10022	H. sapiens	INSL5	insulin like 5	GO:2000253 positive regulation of feeding behavior;GO:0060259 regulation of feeding behavior;GO:0048520 positive regulation of behavior					(M5883)NABA SECRETED FACTORS; (M5885)NABA MATRISOME ASSOCIATED; (M5889)NABA MATRISOME	(M5956)HALLMARK KRAS SIGNALING DN	0.0	0.0	0.0	0.0	0.0	0.0	0.0	0.0	0.0	0.0	0.0	0.0	0.0	0.0	0.0	1.0	0.0	0.0	0.0	0.0
INSRR	3645	symbol	H. sapiens	3645	H. sapiens	INSRR	insulin receptor related receptor	GO:0071469 cellular response to alkaline pH;GO:0010446 response to alkaline pH;GO:0030238 male sex determination	Tyr protein kinase family	Enzymes/{ENZYME proteins/Transferases,Kinases/Tyr protein kinases}					0.0	0.0	0.0	0.0	0.0	0.0	0.0	0.0	0.0	0.0	0.0	0.0	0.0	0.0	0.0	0.0	0.0	0.0	0.0	0.0
IQGAP1	8826	symbol	H. sapiens	8826	H. sapiens	IQGAP1	IQ motif containing GTPase activating protein 1	GO:0072015 glomerular visceral epithelial cell development;GO:0072310 glomerular epithelial cell development;GO:0072112 glomerular visceral epithelial cell differentiation			Cell Junctions;Plasma membrane(Supported)		(M163)PID LIS1 PATHWAY; (M72)PID NECTIN PATHWAY; (M156)PID ECADHERIN NASCENT AJ PATHWAY		1.0	0.0	1.0	1.0	1.0	0.0	0.0	0.0	0.0	0.0	0.0	0.0	0.0	0.0	0.0	0.0	0.0	0.0	0.0	0.0
IRAK2	3656	symbol	H. sapiens	3656	H. sapiens	IRAK2	interleukin 1 receptor associated kinase 2	GO:0070423 nucleotide-binding oligomerization domain containing signaling pathway;GO:0034162 toll-like receptor 9 signaling pathway;GO:0002755 MyD88-dependent toll-like receptor signaling pathway	TKL Ser/Thr protein kinase family	Enzymes/Kinases/TKL Ser/Thr protein kinases	Vesicles(Approved)		(M264)PID TOLL ENDOGENOUS PATHWAY	(M5932)HALLMARK INFLAMMATORY RESPONSE	0.0	1.0	0.0	0.0	0.0	0.0	1.0	1.0	1.0	0.0	0.0	0.0	1.0	0.0	0.0	0.0	0.0	0.0	0.0	0.0
IRAK3	11213	symbol	H. sapiens	11213	H. sapiens	IRAK3	interleukin 1 receptor associated kinase 3	GO:0010933 positive regulation of macrophage tolerance induction;GO:0010932 regulation of macrophage tolerance induction;GO:0010936 negative regulation of macrophage cytokine production	TKL Ser/Thr protein kinase family	Enzymes/{ENZYME proteins/Transferases,Kinases/TKL Ser/Thr protein kinases}	Vesicles(Approved)		(M110)PID IL1 PATHWAY		0.0	1.0	0.0	1.0	0.0	1.0	1.0	1.0	1.0	0.0	1.0	0.0	0.0	0.0	0.0	0.0	0.0	0.0	0.0	0.0
IRF1	3659	symbol	H. sapiens	3659	H. sapiens	IRF1	interferon regulatory factor 1	GO:0034124 regulation of MyD88-dependent toll-like receptor signaling pathway;GO:0045590 negative regulation of regulatory T cell differentiation;GO:2000564 regulation of CD8-positive, alpha-beta T cell proliferation		Transcription factors/Helix-turn-helix domains	Cytosol;Nucleoplasm(Supported)		(M290)PID IL12 STAT4 PATHWAY; (M161)PID IFNG PATHWAY; (M183)PID IL6 7 PATHWAY	(M5897)HALLMARK IL6 JAK STAT3 SIGNALING; (M5911)HALLMARK INTERFERON ALPHA RESPONSE; (M5941)HALLMARK UV RESPONSE UP	0.0	1.0	1.0	1.0	0.0	1.0	1.0	0.0	1.0	1.0	1.0	0.0	0.0	0.0	0.0	0.0	0.0	0.0	1.0	1.0
IRF4	3662	symbol	H. sapiens	3662	H. sapiens	IRF4	interferon regulatory factor 4	GO:0072540 T-helper 17 cell lineage commitment;GO:0002295 T-helper cell lineage commitment;GO:0072539 T-helper 17 cell differentiation		Transcription factors/Helix-turn-helix domains	Nucleoplasm(Supported)		(M60)PID NFAT TFPATHWAY; (M28)PID IL4 2PATHWAY	(M5947)HALLMARK IL2 STAT5 SIGNALING; (M5950)HALLMARK ALLOGRAFT REJECTION; (M5913)HALLMARK INTERFERON GAMMA RESPONSE	1.0	1.0	1.0	1.0	0.0	1.0	1.0	0.0	1.0	1.0	1.0	0.0	1.0	0.0	0.0	0.0	0.0	0.0	1.0	0.0
IRF5	3663	symbol	H. sapiens	3663	H. sapiens	IRF5	interferon regulatory factor 5	GO:0032727 positive regulation of interferon-alpha production;GO:0032494 response to peptidoglycan;GO:0032728 positive regulation of interferon-beta production		Transcription factors/Helix-turn-helix domains			(M145)PID P53 DOWNSTREAM PATHWAY	(M5913)HALLMARK INTERFERON GAMMA RESPONSE	0.0	1.0	0.0	1.0	0.0	0.0	0.0	1.0	0.0	0.0	0.0	0.0	0.0	0.0	0.0	0.0	0.0	0.0	0.0	0.0
ITGA3	3675	symbol	H. sapiens	3675	H. sapiens	ITGA3	integrin subunit alpha 3	GO:0035024 negative regulation of Rho protein signal transduction;GO:0097062 dendritic spine maintenance;GO:0048333 mesodermal cell differentiation		CD markers	Plasma membrane(Supported)		(M47)PID INTEGRIN CS PATHWAY; (M69)PID REELIN PATHWAY; (M196)PID IL23 PATHWAY	(M5915)HALLMARK APICAL JUNCTION	0.0	0.0	1.0	0.0	1.0	0.0	0.0	0.0	0.0	0.0	0.0	1.0	1.0	0.0	0.0	0.0	0.0	0.0	0.0	1.0
ITGA4	3676	symbol	H. sapiens	3676	H. sapiens	ITGA4	integrin subunit alpha 4	GO:1990771 clathrin-dependent extracellular exosome endocytosis;GO:0090074 negative regulation of protein homodimerization activity;GO:1903238 positive regulation of leukocyte tethering or rolling		CD markers	Plasma membrane(Approved)	Natalizumab (Metal ion binding);ATL1102 (Metal ion binding);CDP323 (Metal ion binding);R1295 (Metal ion binding);R411 (Metal ion binding);MLN-02 (Metal ion binding);Tinzaparin (Metal ion binding);Vedolizumab (Metal ion binding)	(M212)PID INTEGRIN5 PATHWAY; (M274)PID LYMPH ANGIOGENESIS PATHWAY; (M47)PID INTEGRIN CS PATHWAY	(M5897)HALLMARK IL6 JAK STAT3 SIGNALING	0.0	0.0	1.0	0.0	1.0	0.0	0.0	0.0	0.0	0.0	0.0	1.0	1.0	0.0	1.0	0.0	0.0	0.0	0.0	1.0
ITGA5	3678	symbol	H. sapiens	3678	H. sapiens	ITGA5	integrin subunit alpha 5	GO:0035313 wound healing, spreading of epidermal cells;GO:1903672 positive regulation of sprouting angiogenesis;GO:0030949 positive regulation of vascular endothelial growth factor receptor signaling pathway		CD markers			(M274)PID LYMPH ANGIOGENESIS PATHWAY; (M47)PID INTEGRIN CS PATHWAY; (M165)PID SYNDECAN 4 PATHWAY	(M5932)HALLMARK INFLAMMATORY RESPONSE; (M5930)HALLMARK EPITHELIAL MESENCHYMAL TRANSITION	0.0	0.0	1.0	0.0	1.0	0.0	0.0	0.0	0.0	0.0	0.0	1.0	1.0	0.0	0.0	0.0	0.0	0.0	0.0	1.0
ITGAM	3684	symbol	H. sapiens	3684	H. sapiens	ITGAM	integrin subunit alpha M	GO:0043315 positive regulation of neutrophil degranulation;GO:0045963 negative regulation of dopamine metabolic process;GO:0110090 positive regulation of hippocampal neuron apoptotic process		CD markers			(M47)PID INTEGRIN CS PATHWAY; (M169)PID INTEGRIN2 PATHWAY; (M159)PID AMB2 NEUTROPHILS PATHWAY	(M5921)HALLMARK COMPLEMENT	1.0	1.0	1.0	1.0	1.0	1.0	1.0	0.0	1.0	0.0	0.0	1.0	1.0	0.0	0.0	0.0	0.0	0.0	0.0	1.0
ITGAX	3687	symbol	H. sapiens	3687	H. sapiens	ITGAX	integrin subunit alpha X	GO:1905956 positive regulation of endothelial tube morphogenesis;GO:1901509 regulation of endothelial tube morphogenesis;GO:0031643 positive regulation of myelination		CD markers			(M47)PID INTEGRIN CS PATHWAY; (M169)PID INTEGRIN2 PATHWAY		1.0	1.0	0.0	0.0	1.0	0.0	0.0	0.0	0.0	0.0	0.0	1.0	1.0	0.0	0.0	0.0	0.0	0.0	0.0	1.0
ITGB2	3689	symbol	H. sapiens	3689	H. sapiens	ITGB2	integrin subunit beta 2	GO:0043315 positive regulation of neutrophil degranulation;GO:0045963 negative regulation of dopamine metabolic process;GO:1902565 positive regulation of neutrophil activation		CD markers	Plasma membrane(Approved)	Simvastatin (Protein kinase binding)	(M47)PID INTEGRIN CS PATHWAY; (M169)PID INTEGRIN2 PATHWAY; (M159)PID AMB2 NEUTROPHILS PATHWAY	(M5950)HALLMARK ALLOGRAFT REJECTION; (M5953)HALLMARK KRAS SIGNALING UP; (M5924)HALLMARK MTORC1 SIGNALING	1.0	1.0	1.0	1.0	1.0	1.0	1.0	0.0	1.0	0.0	0.0	1.0	1.0	0.0	1.0	0.0	0.0	0.0	0.0	1.0
ITGB3	3690	symbol	H. sapiens	3690	H. sapiens	ITGB3	integrin subunit beta 3	GO:0045715 negative regulation of low-density lipoprotein particle receptor biosynthetic process;GO:0051611 regulation of serotonin uptake;GO:0099149 regulation of postsynaptic neurotransmitter receptor internalization		CD markers		Abciximab (Virus receptor activity);Eptifibatide (Virus receptor activity);Anti-thymocyte Globulin (Rabbit) (Virus receptor activity);Tirofiban (Virus receptor activity);Lefradafiban (Virus receptor activity);LM-609 (Virus receptor activity)	(M103)PID S1P S1P1 PATHWAY; (M47)PID INTEGRIN CS PATHWAY; (M55)PID S1P S1P3 PATHWAY	(M5897)HALLMARK IL6 JAK STAT3 SIGNALING; (M5946)HALLMARK COAGULATION; (M5942)HALLMARK UV RESPONSE DN	1.0	0.0	0.0	0.0	1.0	0.0	0.0	0.0	0.0	0.0	0.0	1.0	1.0	0.0	0.0	0.0	1.0	0.0	1.0	1.0
ITGB7	3695	symbol	H. sapiens	3695	H. sapiens	ITGB7	integrin subunit beta 7	GO:0003366 cell-matrix adhesion involved in ameboidal cell migration;GO:0046718 viral entry into host cell;GO:0050901 leukocyte tethering or rolling			Cytosol;Plasma membrane(Approved)	R1295 (Virus receptor activity);MLN-02 (Virus receptor activity);Vedolizumab (Virus receptor activity)	(M212)PID INTEGRIN5 PATHWAY; (M47)PID INTEGRIN CS PATHWAY; (M156)PID ECADHERIN NASCENT AJ PATHWAY	(M5913)HALLMARK INTERFERON GAMMA RESPONSE	0.0	0.0	1.0	0.0	1.0	0.0	0.0	0.0	0.0	0.0	0.0	1.0	1.0	0.0	1.0	0.0	0.0	0.0	0.0	0.0
ITK	3702	symbol	H. sapiens	3702	H. sapiens	ITK	IL2 inducible T cell kinase	GO:0001865 NK T cell differentiation;GO:0007202 activation of phospholipase C activity;GO:0010863 positive regulation of phospholipase C activity	Tyr protein kinase family	Enzymes/{ENZYME proteins/Transferases,Kinases/Tyr protein kinases}		Staurosporine (Non-membrane spanning protein tyrosine kinase activity);Pazopanib (Non-membrane spanning protein tyrosine kinase activity)	(M9526)ST T CELL SIGNAL TRANSDUCTION; (M141)PID PI3KCI PATHWAY; (M7)PID FCER1 PATHWAY	(M5950)HALLMARK ALLOGRAFT REJECTION	0.0	0.0	1.0	0.0	0.0	1.0	1.0	0.0	0.0	1.0	0.0	0.0	1.0	0.0	1.0	0.0	0.0	0.0	0.0	0.0
ITPKC	80271	symbol	H. sapiens	80271	H. sapiens	ITPKC	inositol-trisphosphate 3-kinase C	GO:0032958 inositol phosphate biosynthetic process;GO:0043647 inositol phosphate metabolic process;GO:0046173 polyol biosynthetic process		Enzymes/ENZYME proteins/Transferases	Nuclear speckles(Supported)				0.0	0.0	0.0	0.0	0.0	0.0	0.0	0.0	0.0	0.0	0.0	0.0	0.0	0.0	0.0	0.0	0.0	0.0	0.0	0.0
ITPR3	3710	symbol	H. sapiens	3710	H. sapiens	ITPR3	inositol 1,4,5-trisphosphate receptor type 3	GO:0051209 release of sequestered calcium ion into cytosol;GO:0050917 sensory perception of umami taste;GO:0097553 calcium ion transmembrane import into cytosol			Vesicles(Uncertain)		(M16518)ST WNT CA2 CYCLIC GMP PATHWAY; (M2701)ST MYOCYTE AD PATHWAY; (M7416)ST GAQ PATHWAY		0.0	0.0	0.0	1.0	0.0	0.0	0.0	0.0	0.0	0.0	0.0	0.0	0.0	0.0	1.0	0.0	0.0	0.0	0.0	1.0
ITPRIP	85450	symbol	H. sapiens	85450	H. sapiens	ITPRIP	inositol 1,4,5-trisphosphate receptor interacting protein	GO:1902042 negative regulation of extrinsic apoptotic signaling pathway via death domain receptors;GO:1902041 regulation of extrinsic apoptotic signaling pathway via death domain receptors;GO:2001237 negative regulation of extrinsic apoptotic signaling pathway			Vesicles(Uncertain)				0.0	0.0	0.0	0.0	0.0	0.0	0.0	0.0	0.0	0.0	0.0	0.0	0.0	0.0	0.0	0.0	0.0	0.0	0.0	0.0
ITPRIPL2	162073	symbol	H. sapiens	162073	H. sapiens	ITPRIPL2	ITPRIP like 2				Centrosome(Approved)				0.0	0.0	0.0	0.0	0.0	0.0	0.0	0.0	0.0	0.0	0.0	0.0	0.0	0.0	0.0	0.0	0.0	0.0	0.0	0.0
JAK3	3718	symbol	H. sapiens	3718	H. sapiens	JAK3	Janus kinase 3	GO:0045626 negative regulation of T-helper 1 cell differentiation;GO:0045625 regulation of T-helper 1 cell differentiation;GO:0045623 negative regulation of T-helper cell differentiation	Tyr protein kinase family	Enzymes/{ENZYME proteins/Transferases,Kinases/Tyr protein kinases}		2-(1,1-DIMETHYLETHYL)9-FLUORO-3,6-DIHYDRO-7H-BENZ[H]-IMIDAZ[4,5-F]ISOQUINOLIN-7-ONE (Protein tyrosine kinase activity);3-{(3R,4R)-4-methyl-3-[methyl(7H-pyrrolo[2,3-d]pyrimidin-4-yl)amino]piperidin-1-yl}-3-oxopropanenitrile (Protein tyrosine kinase activity);Tofacitinib (Protein tyrosine kinase activity)	(M5248)ST JAK STAT PATHWAY; (M9174)ST STAT3 PATHWAY; (M9378)ST INTERLEUKIN 4 PATHWAY		1.0	1.0	1.0	1.0	0.0	1.0	0.0	0.0	0.0	1.0	1.0	0.0	1.0	0.0	0.0	0.0	0.0	0.0	1.0	0.0
JUNB	3726	symbol	H. sapiens	3726	H. sapiens	JUNB	JunB proto-oncogene, AP-1 transcription factor subunit	GO:0001829 trophectodermal cell differentiation;GO:0060716 labyrinthine layer blood vessel development;GO:0046697 decidualization		Transcription factors/Basic domains	Nucleoplasm(Enhanced)		(M235)PID TCR CALCIUM PATHWAY; (M65)PID FRA PATHWAY; (M60)PID NFAT TFPATHWAY	(M5938)HALLMARK REACTIVE OXIGEN SPECIES PATHWAY; (M5896)HALLMARK TGF BETA SIGNALING; (M5941)HALLMARK UV RESPONSE UP	0.0	1.0	1.0	0.0	0.0	0.0	0.0	1.0	0.0	0.0	0.0	0.0	0.0	0.0	0.0	0.0	1.0	1.0	1.0	0.0
KCNE1	3753	symbol	H. sapiens	3753	H. sapiens	KCNE1	potassium voltage-gated channel subfamily E regulatory subunit 1	GO:1902260 negative regulation of delayed rectifier potassium channel activity;GO:1903817 negative regulation of voltage-gated potassium channel activity;GO:0098915 membrane repolarization during ventricular cardiac muscle cell action potential				Indapamide (Telethonin binding);Azimilide (Telethonin binding)			0.0	0.0	0.0	1.0	0.0	0.0	0.0	0.0	0.0	0.0	0.0	0.0	0.0	0.0	0.0	0.0	0.0	0.0	0.0	0.0
KCNE4	23704	symbol	H. sapiens	23704	H. sapiens	KCNE4	potassium voltage-gated channel subfamily E regulatory subunit 4	GO:1902260 negative regulation of delayed rectifier potassium channel activity;GO:1903817 negative regulation of voltage-gated potassium channel activity;GO:0098915 membrane repolarization during ventricular cardiac muscle cell action potential			Microtubules;Nuclear bodies(Approved)				0.0	0.0	0.0	0.0	0.0	0.0	0.0	0.0	0.0	0.0	0.0	0.0	0.0	0.0	0.0	0.0	0.0	0.0	0.0	0.0
KCNJ15	3772	symbol	H. sapiens	3772	H. sapiens	KCNJ15	potassium inwardly rectifying channel subfamily J member 15	GO:1990573 potassium ion import across plasma membrane;GO:0010107 potassium ion import;GO:0098659 inorganic cation import across plasma membrane		Voltage-gated ion channels/Inwardly Rectifying Potassium Channels	Cytosol;Plasma membrane;Vesicles(Approved)		(M118)PID INTEGRIN A9B1 PATHWAY		0.0	0.0	0.0	0.0	0.0	0.0	0.0	0.0	0.0	0.0	0.0	0.0	0.0	0.0	0.0	0.0	0.0	0.0	0.0	0.0
KCNK6	9424	symbol	H. sapiens	9424	H. sapiens	KCNK6	potassium two pore domain channel subfamily K member 6	GO:0003085 negative regulation of systemic arterial blood pressure;GO:0060075 regulation of resting membrane potential;GO:0061337 cardiac conduction		Transporters/Transporter channels and pores;Voltage-gated ion channels/Two-P Potassium Channels	Actin filaments;Cytosol;Plasma membrane(Approved)	Ibutilide (Potassium ion leak channel activity);Quinidine (Potassium ion leak channel activity)			0.0	0.0	0.0	0.0	0.0	0.0	0.0	0.0	0.0	0.0	0.0	0.0	0.0	0.0	0.0	0.0	0.0	0.0	0.0	0.0
KCNMB1	3779	symbol	H. sapiens	3779	H. sapiens	KCNMB1	potassium calcium-activated channel subfamily M regulatory beta subunit 1	GO:1903413 cellular response to bile acid;GO:1901381 positive regulation of potassium ion transmembrane transport;GO:1903412 response to bile acid		Transporters/Accessory Factors Involved in Transport		Miconazole (Potassium channel regulator activity)		(M5956)HALLMARK KRAS SIGNALING DN	0.0	0.0	0.0	0.0	0.0	0.0	0.0	1.0	0.0	0.0	0.0	0.0	0.0	0.0	0.0	0.0	0.0	0.0	0.0	1.0
KCNN4	3783	symbol	H. sapiens	3783	H. sapiens	KCNN4	potassium calcium-activated channel subfamily N member 4	GO:0050862 positive regulation of T cell receptor signaling pathway;GO:0050857 positive regulation of antigen receptor-mediated signaling pathway;GO:0050856 regulation of T cell receptor signaling pathway		Transporters/Transporter channels and pores;Voltage-gated ion channels/Calcium-Activated Potassium Channels		Enflurane (Protein phosphatase binding);Clotrimazole (Protein phosphatase binding);Quinine (Protein phosphatase binding);Miconazole (Protein phosphatase binding);Halothane (Protein phosphatase binding)		(M5953)HALLMARK KRAS SIGNALING UP	0.0	0.0	0.0	1.0	0.0	0.0	1.0	0.0	0.0	0.0	0.0	0.0	0.0	0.0	0.0	0.0	0.0	0.0	0.0	1.0
KCNQ1	3784	symbol	H. sapiens	3784	H. sapiens	KCNQ1	potassium voltage-gated channel subfamily Q member 1	GO:0098914 membrane repolarization during atrial cardiac muscle cell action potential;GO:0086014 atrial cardiac muscle cell action potential;GO:0098915 membrane repolarization during ventricular cardiac muscle cell action potential		Transporters/Transporter channels and pores;Voltage-gated ion channels/Voltage-Gated Potassium Channels		Indapamide (Voltage-gated potassium channel activity involved in ventricular cardiac muscle cell action potential repolarization);Bepridil (Voltage-gated potassium channel activity involved in ventricular cardiac muscle cell action potential repolarization);Azimilide (Voltage-gated potassium channel activity involved in ventricular cardiac muscle cell action potential repolarization);ICA-105665 (…			0.0	0.0	0.0	0.0	0.0	0.0	0.0	0.0	0.0	0.0	0.0	0.0	0.0	0.0	0.0	0.0	0.0	0.0	0.0	0.0
KCTD12	115207	symbol	H. sapiens	115207	H. sapiens	KCTD12	potassium channel tetramerization domain containing 12	GO:0051260 protein homooligomerization;GO:0051259 protein complex oligomerization;GO:0065003 protein-containing complex assembly			Mitochondria(Approved)				0.0	0.0	0.0	0.0	0.0	0.0	0.0	0.0	0.0	0.0	0.0	0.0	0.0	0.0	0.0	0.0	0.0	0.0	0.0	0.0
KIAA1217	56243	symbol	H. sapiens	56243	H. sapiens	KIAA1217	KIAA1217	GO:0048706 embryonic skeletal system development;GO:0043009 chordate embryonic development;GO:0001501 skeletal system development			Cytosol;Nucleus(Approved)				0.0	0.0	0.0	0.0	0.0	0.0	0.0	0.0	0.0	0.0	0.0	0.0	0.0	0.0	0.0	0.0	0.0	0.0	0.0	0.0
KLHDC7A	127707	symbol	H. sapiens	127707	H. sapiens	KLHDC7A	kelch domain containing 7A				Nuclear speckles(Approved)				0.0	0.0	0.0	0.0	0.0	0.0	0.0	0.0	0.0	0.0	0.0	0.0	0.0	0.0	0.0	0.0	0.0	0.0	0.0	0.0
KLHDC7B	113730	symbol	H. sapiens	113730	H. sapiens	KLHDC7B	kelch domain containing 7B								0.0	0.0	0.0	0.0	0.0	0.0	0.0	0.0	0.0	0.0	0.0	0.0	0.0	0.0	0.0	0.0	0.0	0.0	0.0	0.0
KLHL6	89857	symbol	H. sapiens	89857	H. sapiens	KLHL6	kelch like family member 6	GO:0002467 germinal center formation;GO:0050853 B cell receptor signaling pathway;GO:0050851 antigen receptor-mediated signaling pathway							0.0	0.0	0.0	0.0	0.0	1.0	1.0	1.0	0.0	0.0	0.0	0.0	0.0	0.0	0.0	0.0	0.0	0.0	0.0	0.0
KLKB1	3818	symbol	H. sapiens	3818	H. sapiens	KLKB1	kallikrein B1	GO:0051919 positive regulation of fibrinolysis;GO:0002542 Factor XII activation;GO:0051917 regulation of fibrinolysis		Enzymes/{ENZYME proteins/Hydrolases,Peptidases/Serine-type peptidases}		Ecallantide (Serine-type endopeptidase activity);C1 Esterase Inhibitor (Human) (Serine-type endopeptidase activity);C1 Esterase Inhibitor (Recombinant) (Serine-type endopeptidase activity)		(M5946)HALLMARK COAGULATION; (M5921)HALLMARK COMPLEMENT	0.0	0.0	0.0	0.0	0.0	0.0	0.0	0.0	1.0	0.0	0.0	1.0	0.0	1.0	0.0	0.0	0.0	0.0	0.0	1.0
KMO	8564	symbol	H. sapiens	8564	H. sapiens	KMO	kynurenine 3-monooxygenase	GO:1903296 positive regulation of glutamate secretion, neurotransmission;GO:1903294 regulation of glutamate secretion, neurotransmission;GO:0034354 'de novo' NAD biosynthetic process from tryptophan		Enzymes/ENZYME proteins/Oxidoreductases					0.0	0.0	0.0	1.0	0.0	0.0	0.0	1.0	0.0	0.0	0.0	0.0	0.0	0.0	0.0	0.0	0.0	0.0	0.0	0.0
KRT18	3875	symbol	H. sapiens	3875	H. sapiens	KRT18	keratin 18	GO:0043000 Golgi to plasma membrane CFTR protein transport;GO:0070268 cornification;GO:0097284 hepatocyte apoptotic process			Cytosol(Enhanced)		(M220)PID CASPASE PATHWAY	(M5910)HALLMARK PROTEIN SECRETION; (M5902)HALLMARK APOPTOSIS; (M5906)HALLMARK ESTROGEN RESPONSE EARLY	0.0	1.0	0.0	0.0	0.0	0.0	0.0	0.0	0.0	0.0	0.0	0.0	0.0	0.0	0.0	0.0	0.0	0.0	0.0	0.0
KRT7	3855	symbol	H. sapiens	3855	H. sapiens	KRT7	keratin 7	GO:0070268 cornification;GO:0031424 keratinization;GO:0030216 keratinocyte differentiation				Primaquine (Structural molecule activity);HspE7 (Structural molecule activity)			0.0	0.0	0.0	0.0	0.0	0.0	0.0	0.0	0.0	0.0	0.0	0.0	0.0	0.0	0.0	0.0	0.0	0.0	0.0	0.0
KRT75	9119	symbol	H. sapiens	9119	H. sapiens	KRT75	keratin 75	GO:0070268 cornification;GO:0031424 keratinization;GO:0030216 keratinocyte differentiation			Cytosol;Plasma membrane(Approved)				0.0	0.0	0.0	0.0	0.0	0.0	0.0	0.0	0.0	0.0	0.0	0.0	0.0	0.0	0.0	0.0	0.0	0.0	0.0	0.0
KRT80	144501	symbol	H. sapiens	144501	H. sapiens	KRT80	keratin 80	GO:0070268 cornification;GO:0031424 keratinization;GO:0030216 keratinocyte differentiation			Intermediate filaments(Enhanced)				0.0	0.0	0.0	0.0	0.0	0.0	0.0	0.0	0.0	0.0	0.0	0.0	0.0	0.0	0.0	0.0	0.0	0.0	0.0	0.0
KRT86	3892	symbol	H. sapiens	3892	H. sapiens	KRT86	keratin 86	GO:0070268 cornification;GO:0031424 keratinization;GO:0030216 keratinocyte differentiation			Cytosol(Approved)				0.0	0.0	0.0	0.0	0.0	0.0	0.0	0.0	0.0	0.0	0.0	0.0	0.0	0.0	0.0	0.0	0.0	0.0	0.0	0.0
KRTAP5-9	3846	symbol	H. sapiens	3846	H. sapiens	KRTAP5-9	keratin associated protein 5-9	GO:0031424 keratinization;GO:0030216 keratinocyte differentiation;GO:0009913 epidermal cell differentiation							0.0	0.0	0.0	0.0	0.0	0.0	0.0	0.0	0.0	0.0	0.0	0.0	0.0	0.0	0.0	0.0	0.0	0.0	0.0	0.0
KRTCAP3	200634	symbol	H. sapiens	200634	H. sapiens	KRTCAP3	keratinocyte associated protein 3				Cytosol;Nucleus(Approved)				0.0	0.0	0.0	0.0	0.0	0.0	0.0	0.0	0.0	0.0	0.0	0.0	0.0	0.0	0.0	0.0	0.0	0.0	0.0	0.0
KYNU	8942	symbol	H. sapiens	8942	H. sapiens	KYNU	kynureninase	GO:0019442 tryptophan catabolic process to acetyl-CoA;GO:0034354 'de novo' NAD biosynthetic process from tryptophan;GO:0097053 L-kynurenine catabolic process		Enzymes/ENZYME proteins/Hydrolases	Cytosol(Supported)Nucleoplasm(Approved)	Pyridoxal Phosphate (Pyridoxal phosphate binding);L-Alanine (Pyridoxal phosphate binding);3-Hydroxyhippuric acid (Pyridoxal phosphate binding)		(M5921)HALLMARK COMPLEMENT; (M5934)HALLMARK XENOBIOTIC METABOLISM; (M5890)HALLMARK TNFA SIGNALING VIA NFKB	0.0	0.0	0.0	0.0	0.0	0.0	0.0	0.0	0.0	0.0	0.0	0.0	0.0	0.0	0.0	0.0	0.0	0.0	0.0	0.0
LACC1	144811	symbol	H. sapiens	144811	H. sapiens	LACC1	laccase domain containing 1								0.0	0.0	0.0	0.0	0.0	0.0	0.0	0.0	0.0	0.0	0.0	0.0	0.0	0.0	0.0	0.0	0.0	0.0	0.0	0.0
LAIR1	3903	symbol	H. sapiens	3903	H. sapiens	LAIR1	leukocyte associated immunoglobulin like receptor 1	GO:0043312 neutrophil degranulation;GO:0002283 neutrophil activation involved in immune response;GO:0042119 neutrophil activation		CD markers	Plasma membrane(Supported)				1.0	0.0	0.0	0.0	0.0	1.0	0.0	0.0	0.0	0.0	0.0	0.0	0.0	0.0	1.0	0.0	0.0	0.0	0.0	0.0
LAMB1	3912	symbol	H. sapiens	3912	H. sapiens	LAMB1	laminin subunit beta 1	GO:0021812 neuronal-glial interaction involved in cerebral cortex radial glia guided migration;GO:0021801 cerebral cortex radial glia guided migration;GO:0021799 cerebral cortex radially oriented cell migration					(M158)PID INTEGRIN4 PATHWAY; (M5887)NABA BASEMENT MEMBRANES; (M53)PID INTEGRIN3 PATHWAY		0.0	0.0	0.0	0.0	1.0	0.0	0.0	0.0	0.0	0.0	0.0	1.0	1.0	0.0	0.0	0.0	0.0	0.0	0.0	0.0
LAMB3	3914	symbol	H. sapiens	3914	H. sapiens	LAMB3	laminin subunit beta 3	GO:0031581 hemidesmosome assembly;GO:0070831 basement membrane assembly;GO:0035987 endodermal cell differentiation			Mitochondria;Nucleoli(Approved)		(M158)PID INTEGRIN4 PATHWAY; (M5887)NABA BASEMENT MEMBRANES; (M239)PID A6B1 A6B4 INTEGRIN PATHWAY	(M5915)HALLMARK APICAL JUNCTION; (M5890)HALLMARK TNFA SIGNALING VIA NFKB	0.0	0.0	0.0	0.0	0.0	0.0	0.0	0.0	0.0	0.0	0.0	1.0	1.0	0.0	0.0	0.0	0.0	0.0	0.0	0.0
LAPTM5	7805	symbol	H. sapiens	7805	H. sapiens	LAPTM5	lysosomal protein transmembrane 5	GO:1990830 cellular response to leukemia inhibitory factor;GO:1990823 response to leukemia inhibitory factor;GO:0071345 cellular response to cytokine stimulus		Transporters/Electrochemical Potential-driven transporters	Cytosol(Approved)			(M5953)HALLMARK KRAS SIGNALING UP	0.0	0.0	0.0	0.0	0.0	0.0	0.0	0.0	0.0	0.0	0.0	0.0	0.0	0.0	0.0	0.0	0.0	0.0	0.0	0.0
LAT	27040	symbol	H. sapiens	27040	H. sapiens	LAT	linker for activation of T cells	GO:0043303 mast cell degranulation;GO:0038095 Fc-epsilon receptor signaling pathway;GO:0050852 T cell receptor signaling pathway		RAS pathway related proteins	Plasma membrane(Supported)Golgi apparatus(Approved)		(M190)PID TCR JNK PATHWAY; (M9526)ST T CELL SIGNAL TRANSDUCTION; (M141)PID PI3KCI PATHWAY		1.0	0.0	1.0	0.0	0.0	1.0	1.0	0.0	0.0	0.0	0.0	0.0	1.0	0.0	1.0	0.0	0.0	0.0	0.0	1.0
LATS2	26524	symbol	H. sapiens	26524	H. sapiens	LATS2	large tumor suppressor kinase 2	GO:0045736 negative regulation of cyclin-dependent protein serine/threonine kinase activity;GO:1904030 negative regulation of cyclin-dependent protein kinase activity;GO:0071901 negative regulation of protein serine/threonine kinase activity	AGC Ser/Thr protein kinase family	Enzymes/{ENZYME proteins/Transferases,Kinases/AGC Ser/Thr protein kinases}	Cytosol;Microtubule organizing center(Supported)		(M58)PID AR PATHWAY	(M5913)HALLMARK INTERFERON GAMMA RESPONSE	0.0	0.0	0.0	0.0	0.0	0.0	0.0	0.0	0.0	0.0	0.0	0.0	0.0	0.0	0.0	0.0	0.0	0.0	0.0	0.0
LAX1	54900	symbol	H. sapiens	54900	H. sapiens	LAX1	lymphocyte transmembrane adaptor 1	GO:0000188 inactivation of MAPK activity;GO:0043407 negative regulation of MAP kinase activity;GO:0050868 negative regulation of T cell activation			Cytosol;Golgi apparatus;Plasma membrane(Enhanced)				0.0	0.0	1.0	0.0	0.0	1.0	1.0	0.0	0.0	0.0	1.0	0.0	0.0	0.0	0.0	0.0	0.0	0.0	0.0	0.0
LCK	3932	symbol	H. sapiens	3932	H. sapiens	LCK	LCK proto-oncogene, Src family tyrosine kinase	GO:0050862 positive regulation of T cell receptor signaling pathway;GO:0050857 positive regulation of antigen receptor-mediated signaling pathway;GO:0051209 release of sequestered calcium ion into cytosol	Tyr protein kinase family	Enzymes/{ENZYME proteins/Transferases,Kinases/Tyr protein kinases}	Golgi apparatus(Approved)	Dasatinib (Sh2 domain binding);{4-[2-Acetylamino-2-(3-Carbamoyl-2-Cyclohexylmethoxy-6,7,8,9-Tetrahydro-5h-Benzocyclohepten-5ylcarbamoyl)-Ethyl]-2-Phosphono-Phenyl}-Phosphonic Acid (Sh2 domain binding);Staurosporine (Sh2 domain binding);1-Tert-Butyl-3-(4-Chloro-Phenyl)-1h-Pyrazolo[3,4-D]Pyrimidin-4-Ylamine (Sh2 domain binding);(4-{2-Acetylamino-2-[1-(3-Carbamoyl-4-Cyclohexylmethoxy-Phenyl)-Ethylca…	(M26)PID NFKAPPAB ATYPICAL PATHWAY; (M33)PID GLYPICAN 1PATHWAY; (M257)PID EPHRINB REV PATHWAY	(M5923)HALLMARK PI3K AKT MTOR SIGNALING; (M5948)HALLMARK BILE ACID METABOLISM; (M5932)HALLMARK INFLAMMATORY RESPONSE	0.0	1.0	1.0	0.0	1.0	0.0	1.0	0.0	0.0	0.0	0.0	0.0	1.0	0.0	1.0	0.0	1.0	0.0	0.0	1.0
LCP1	3936	symbol	H. sapiens	3936	H. sapiens	LCP1	lymphocyte cytosolic protein 1	GO:0071803 positive regulation of podosome assembly;GO:0044319 wound healing, spreading of cells;GO:0035722 interleukin-12-mediated signaling pathway			Actin filaments;Cytosol;Plasma membrane(Approved)			(M5953)HALLMARK KRAS SIGNALING UP	1.0	1.0	1.0	1.0	0.0	0.0	0.0	0.0	0.0	1.0	0.0	1.0	0.0	0.0	0.0	0.0	0.0	0.0	0.0	1.0
LCP2	3937	symbol	H. sapiens	3937	H. sapiens	LCP2	lymphocyte cytosolic protein 2	GO:0038095 Fc-epsilon receptor signaling pathway;GO:0050852 T cell receptor signaling pathway;GO:0038093 Fc receptor signaling pathway					(M190)PID TCR JNK PATHWAY; (M9526)ST T CELL SIGNAL TRANSDUCTION; (M88)PID CD8 TCR PATHWAY	(M5921)HALLMARK COMPLEMENT; (M5913)HALLMARK INTERFERON GAMMA RESPONSE; (M5932)HALLMARK INFLAMMATORY RESPONSE	1.0	0.0	0.0	1.0	0.0	0.0	1.0	0.0	0.0	0.0	0.0	0.0	1.0	0.0	1.0	0.0	1.0	0.0	0.0	1.0
LCTL	197021	symbol	H. sapiens	197021	H. sapiens	LCTL	lactase like	GO:0002089 lens morphogenesis in camera-type eye;GO:0002088 lens development in camera-type eye;GO:0048593 camera-type eye morphogenesis			Endoplasmic reticulum;Plasma membrane(Approved)	2,4-Dihydroxy-7-(Methyloxy)-2h-1,4-Benzoxazin-3(4h)-One (Hydrolase activity, hydrolyzing o-glycosyl compounds);Beta-D-Glucose (Hydrolase activity, hydrolyzing o-glycosyl compounds);Nojirimycine Tetrazole (Hydrolase activity, hydrolyzing o-glycosyl compounds);(2s)-Hydroxy(4-Hydroxyphenyl)Ethanenitrile (Hydrolase activity, hydrolyzing o-glycosyl compounds);PARA-NITROPHENYL 1-THIO-BETA-D-GLUCOPYRANO…			0.0	0.0	0.0	0.0	0.0	0.0	0.0	0.0	0.0	0.0	0.0	0.0	0.0	0.0	0.0	0.0	0.0	0.0	0.0	0.0
LDLRAD2	401944	symbol	H. sapiens	401944	H. sapiens	LDLRAD2	low density lipoprotein receptor class A domain containing 2								0.0	0.0	0.0	0.0	0.0	0.0	0.0	0.0	0.0	0.0	0.0	0.0	0.0	0.0	0.0	0.0	0.0	0.0	0.0	0.0
LENG8	114823	symbol	H. sapiens	114823	H. sapiens	LENG8	leukocyte receptor cluster member 8				Nucleus(Supported)				0.0	0.0	0.0	0.0	0.0	0.0	0.0	0.0	0.0	0.0	0.0	0.0	0.0	0.0	0.0	0.0	0.0	0.0	0.0	0.0
LEP	3952	symbol	H. sapiens	3952	H. sapiens	LEP	leptin	GO:2000486 negative regulation of glutamine transport;GO:0033686 positive regulation of luteinizing hormone secretion;GO:0046881 positive regulation of follicle-stimulating hormone secretion					(M50)PID PTP1B PATHWAY; (M255)PID HIF1 TFPATHWAY; (M5883)NABA SECRETED FACTORS	(M5905)HALLMARK ADIPOGENESIS	0.0	1.0	1.0	1.0	1.0	1.0	0.0	1.0	1.0	0.0	0.0	0.0	0.0	1.0	0.0	1.0	0.0	0.0	0.0	0.0
LGALS12	85329	symbol	H. sapiens	85329	H. sapiens	LGALS12	galectin 12	GO:0050994 regulation of lipid catabolic process;GO:0045598 regulation of fat cell differentiation;GO:0097193 intrinsic apoptotic signaling pathway					(M5880)NABA ECM AFFILIATED; (M5885)NABA MATRISOME ASSOCIATED; (M5889)NABA MATRISOME		0.0	0.0	0.0	0.0	0.0	0.0	0.0	0.0	0.0	0.0	0.0	0.0	0.0	0.0	0.0	1.0	0.0	0.0	0.0	0.0
LGALS3BP	3959	symbol	H. sapiens	3959	H. sapiens	LGALS3BP	galectin 3 binding protein	GO:0002576 platelet degranulation;GO:0006968 cellular defense response;GO:0045055 regulated exocytosis						(M5911)HALLMARK INTERFERON ALPHA RESPONSE; (M5913)HALLMARK INTERFERON GAMMA RESPONSE	1.0	0.0	0.0	0.0	0.0	0.0	0.0	0.0	0.0	0.0	0.0	0.0	0.0	0.0	0.0	0.0	0.0	0.0	0.0	1.0
LGALS8	3964	symbol	H. sapiens	3964	H. sapiens	LGALS8	galectin 8	GO:1904977 lymphatic endothelial cell migration;GO:0098792 xenophagy;GO:0036303 lymph vessel morphogenesis			Plasma membrane(Approved)		(M5880)NABA ECM AFFILIATED; (M5885)NABA MATRISOME ASSOCIATED; (M5889)NABA MATRISOME		0.0	0.0	0.0	0.0	0.0	0.0	0.0	0.0	0.0	0.0	0.0	0.0	0.0	0.0	0.0	1.0	0.0	0.0	0.0	0.0
LHFPL2	10184	symbol	H. sapiens	10184	H. sapiens	LHFPL2	LHFPL tetraspan subfamily member 2	GO:1905516 positive regulation of fertilization;GO:0002576 platelet degranulation;GO:0080154 regulation of fertilization			Actin filaments;Vesicles(Approved)				1.0	0.0	0.0	0.0	0.0	0.0	0.0	0.0	0.0	0.0	0.0	0.0	0.0	0.0	0.0	0.0	0.0	0.0	0.0	1.0
LIF	3976	symbol	H. sapiens	3976	H. sapiens	LIF	LIF interleukin 6 family cytokine	GO:0072108 positive regulation of mesenchymal to epithelial transition involved in metanephros morphogenesis;GO:1901676 positive regulation of histone H3-K27 acetylation;GO:0003339 regulation of mesenchymal to epithelial transition involved in metanephros morphogenesis			Cytosol(Enhanced)		(M65)PID FRA PATHWAY; (M145)PID P53 DOWNSTREAM PATHWAY; (M5883)NABA SECRETED FACTORS	(M5947)HALLMARK IL2 STAT5 SIGNALING; (M5932)HALLMARK INFLAMMATORY RESPONSE; (M5953)HALLMARK KRAS SIGNALING UP	0.0	1.0	1.0	1.0	0.0	0.0	0.0	0.0	0.0	0.0	1.0	0.0	0.0	0.0	0.0	1.0	0.0	1.0	1.0	0.0
LILRA5	353514	symbol	H. sapiens	353514	H. sapiens	LILRA5	leukocyte immunoglobulin like receptor A5	GO:2001183 negative regulation of interleukin-12 secretion;GO:2000666 negative regulation of interleukin-13 secretion;GO:2001181 positive regulation of interleukin-10 secretion		CD markers					0.0	0.0	1.0	1.0	0.0	0.0	0.0	0.0	1.0	0.0	0.0	0.0	0.0	1.0	1.0	0.0	1.0	0.0	0.0	0.0
LILRA6	79168	symbol	H. sapiens	79168	H. sapiens	LILRA6	leukocyte immunoglobulin like receptor A6	GO:0002250 adaptive immune response;GO:0006955 immune response;GO:0002376 immune system process							0.0	0.0	0.0	0.0	0.0	1.0	0.0	0.0	0.0	0.0	0.0	0.0	0.0	0.0	0.0	0.0	1.0	0.0	0.0	0.0
LILRB1	10859	symbol	H. sapiens	10859	H. sapiens	LILRB1	leukocyte immunoglobulin like receptor B1	GO:2001193 positive regulation of gamma-delta T cell activation involved in immune response;GO:0035548 negative regulation of interferon-beta secretion;GO:2001191 regulation of gamma-delta T cell activation involved in immune response							1.0	0.0	1.0	1.0	0.0	1.0	1.0	1.0	1.0	1.0	1.0	0.0	0.0	0.0	1.0	0.0	1.0	0.0	1.0	0.0
LILRB2	10288	symbol	H. sapiens	10288	H. sapiens	LILRB2	leukocyte immunoglobulin like receptor B2	GO:1905875 negative regulation of postsynaptic density organization;GO:1900454 positive regulation of long-term synaptic depression;GO:0002774 Fc receptor mediated inhibitory signaling pathway		CD markers					1.0	0.0	1.0	1.0	0.0	1.0	1.0	1.0	0.0	0.0	1.0	0.0	1.0	0.0	0.0	0.0	1.0	0.0	0.0	0.0
LILRB3	11025	symbol	H. sapiens	11025	H. sapiens	LILRB3	leukocyte immunoglobulin like receptor B3	GO:0045671 negative regulation of osteoclast differentiation;GO:0002762 negative regulation of myeloid leukocyte differentiation;GO:0045670 regulation of osteoclast differentiation		CD markers					1.0	0.0	1.0	0.0	0.0	1.0	0.0	0.0	0.0	0.0	1.0	0.0	0.0	0.0	0.0	0.0	1.0	0.0	1.0	0.0
LILRB4	11006	symbol	H. sapiens	11006	H. sapiens	LILRB4	leukocyte immunoglobulin like receptor B4	GO:0050860 negative regulation of T cell receptor signaling pathway;GO:0045591 positive regulation of regulatory T cell differentiation;GO:0050858 negative regulation of antigen receptor-mediated signaling pathway		CD markers					0.0	0.0	1.0	0.0	0.0	1.0	1.0	0.0	0.0	0.0	1.0	0.0	0.0	0.0	1.0	0.0	1.0	0.0	1.0	0.0
LIPN	643418	symbol	H. sapiens	643418	H. sapiens	LIPN	lipase family member N	GO:0070268 cornification;GO:0031424 keratinization;GO:0030216 keratinocyte differentiation							0.0	0.0	0.0	0.0	0.0	0.0	0.0	0.0	0.0	0.0	0.0	0.0	0.0	0.0	0.0	0.0	0.0	0.0	0.0	0.0
LITAF	9516	symbol	H. sapiens	9516	H. sapiens	LITAF	lipopolysaccharide induced TNF factor	GO:1901223 negative regulation of NIK/NF-kappaB signaling;GO:0071222 cellular response to lipopolysaccharide;GO:0043123 positive regulation of I-kappaB kinase/NF-kappaB signaling			Cytosol;Nucleoplasm;Vesicles(Supported)			(M5890)HALLMARK TNFA SIGNALING VIA NFKB	0.0	0.0	0.0	1.0	0.0	0.0	0.0	1.0	0.0	0.0	0.0	0.0	0.0	0.0	0.0	0.0	0.0	0.0	0.0	0.0
LMLN	89782	symbol	H. sapiens	89782	H. sapiens	LMLN	leishmanolysin like peptidase	GO:0051301 cell division;GO:0007155 cell adhesion;GO:0022610 biological adhesion		Enzymes/Peptidases/Metallopeptidases	Cytosol;Focal adhesion sites(Supported)				0.0	0.0	0.0	0.0	0.0	0.0	0.0	0.0	0.0	0.0	0.0	0.0	0.0	0.0	0.0	0.0	0.0	0.0	0.0	0.0
LMNTD2	256329	symbol	H. sapiens	256329	H. sapiens	LMNTD2	lamin tail domain containing 2				Cytoplasmic bodies(Approved)				0.0	0.0	0.0	0.0	0.0	0.0	0.0	0.0	0.0	0.0	0.0	0.0	0.0	0.0	0.0	0.0	0.0	0.0	0.0	0.0
LNPEP	4012	symbol	H. sapiens	4012	H. sapiens	LNPEP	leucyl and cystinyl aminopeptidase	GO:0002480 antigen processing and presentation of exogenous peptide antigen via MHC class I, TAP-independent;GO:0120163 negative regulation of cold-induced thermogenesis;GO:0042590 antigen processing and presentation of exogenous peptide antigen via MHC class I		Enzymes/{ENZYME proteins/Hydrolases,Peptidases/Metallopeptidases}			(M247)PID INSULIN GLUCOSE PATHWAY; (M7955)SIG INSULIN RECEPTOR PATHWAY IN CARDIAC MYOCYTES		0.0	0.0	0.0	0.0	0.0	0.0	0.0	0.0	0.0	0.0	0.0	0.0	1.0	0.0	1.0	0.0	0.0	0.0	0.0	0.0
LOX	4015	symbol	H. sapiens	4015	H. sapiens	LOX	lysyl oxidase	GO:0035906 descending aorta development;GO:0035905 ascending aorta development;GO:2000586 regulation of platelet-derived growth factor receptor-beta signaling pathway		Enzymes/ENZYME proteins/Oxidoreductases	Endoplasmic reticulum(Supported)		(M3468)NABA ECM REGULATORS; (M5885)NABA MATRISOME ASSOCIATED; (M5889)NABA MATRISOME	(M5891)HALLMARK HYPOXIA; (M5930)HALLMARK EPITHELIAL MESENCHYMAL TRANSITION	0.0	0.0	1.0	0.0	1.0	0.0	0.0	0.0	0.0	0.0	0.0	1.0	0.0	0.0	0.0	1.0	0.0	0.0	1.0	1.0
LOXL1	4016	symbol	H. sapiens	4016	H. sapiens	LOXL1	lysyl oxidase like 1	GO:0018277 protein deamination;GO:0018057 peptidyl-lysine oxidation;GO:0035904 aorta development			Endoplasmic reticulum(Approved)		(M3468)NABA ECM REGULATORS; (M5885)NABA MATRISOME ASSOCIATED; (M5889)NABA MATRISOME	(M5930)HALLMARK EPITHELIAL MESENCHYMAL TRANSITION	0.0	0.0	0.0	0.0	0.0	0.0	0.0	1.0	0.0	0.0	0.0	1.0	0.0	0.0	0.0	1.0	0.0	0.0	0.0	0.0
LOXL2	4017	symbol	H. sapiens	4017	H. sapiens	LOXL2	lysyl oxidase like 2	GO:1902455 negative regulation of stem cell population maintenance;GO:0032332 positive regulation of chondrocyte differentiation;GO:0018057 peptidyl-lysine oxidation		Enzymes/ENZYME proteins/Oxidoreductases	Nucleoplasm(Approved)		(M3468)NABA ECM REGULATORS; (M5885)NABA MATRISOME ASSOCIATED; (M5889)NABA MATRISOME	(M5930)HALLMARK EPITHELIAL MESENCHYMAL TRANSITION	0.0	0.0	0.0	0.0	0.0	0.0	0.0	0.0	0.0	0.0	0.0	1.0	0.0	0.0	0.0	1.0	0.0	0.0	0.0	0.0
LOXL4	84171	symbol	H. sapiens	84171	H. sapiens	LOXL4	lysyl oxidase like 4	GO:0018057 peptidyl-lysine oxidation;GO:0018158 protein oxidation;GO:0030199 collagen fibril organization			Vesicles(Approved)		(M3468)NABA ECM REGULATORS; (M5885)NABA MATRISOME ASSOCIATED; (M5889)NABA MATRISOME		0.0	0.0	0.0	0.0	0.0	0.0	0.0	0.0	0.0	0.0	0.0	1.0	0.0	0.0	0.0	1.0	0.0	0.0	0.0	0.0
LPAR6	10161	symbol	H. sapiens	10161	H. sapiens	LPAR6	lysophosphatidic acid receptor 6	GO:0051482 positive regulation of cytosolic calcium ion concentration involved in phospholipase C-activating G protein-coupled signaling pathway;GO:0001835 blastocyst hatching;GO:0035025 positive regulation of Rho protein signal transduction		G-protein coupled receptors/{GPCRs excl olfactory receptors,Lysolipids receptors}	Plasma membrane(Supported)Vesicles(Approved)			(M5911)HALLMARK INTERFERON ALPHA RESPONSE	0.0	0.0	0.0	0.0	0.0	0.0	0.0	0.0	0.0	0.0	0.0	0.0	0.0	0.0	0.0	0.0	0.0	0.0	0.0	0.0
LPP	4026	symbol	H. sapiens	4026	H. sapiens	LPP	LIM domain containing preferred translocation partner in lipoma	GO:0098609 cell-cell adhesion;GO:0007155 cell adhesion;GO:0022610 biological adhesion			Cytosol;Focal adhesion sites(Enhanced)		(M232)PID ECADHERIN STABILIZATION PATHWAY		0.0	0.0	0.0	0.0	0.0	0.0	0.0	0.0	0.0	0.0	0.0	0.0	0.0	0.0	0.0	0.0	0.0	0.0	0.0	0.0
LPXN	9404	symbol	H. sapiens	9404	H. sapiens	LPXN	leupaxin	GO:0050859 negative regulation of B cell receptor signaling pathway;GO:0050855 regulation of B cell receptor signaling pathway;GO:0050858 negative regulation of antigen receptor-mediated signaling pathway			Cytosol;Focal adhesion sites(Enhanced)Nuclear speckles(Supported)				0.0	0.0	1.0	0.0	0.0	0.0	1.0	0.0	0.0	0.0	1.0	0.0	0.0	0.0	0.0	0.0	0.0	0.0	0.0	0.0
LRG1	116844	symbol	H. sapiens	116844	H. sapiens	LRG1	leucine rich alpha-2-glycoprotein 1	GO:0030511 positive regulation of transforming growth factor beta receptor signaling pathway;GO:1903846 positive regulation of cellular response to transforming growth factor beta stimulus;GO:0045766 positive regulation of angiogenesis			Vesicles(Approved)		(M3008)NABA ECM GLYCOPROTEINS; (M5884)NABA CORE MATRISOME; (M5889)NABA MATRISOME		1.0	0.0	0.0	0.0	0.0	0.0	0.0	1.0	0.0	0.0	0.0	1.0	0.0	0.0	0.0	0.0	0.0	0.0	0.0	0.0
LRP1	4035	symbol	H. sapiens	4035	H. sapiens	LRP1	LDL receptor related protein 1	GO:0048694 positive regulation of collateral sprouting of injured axon;GO:0048693 regulation of collateral sprouting of injured axon;GO:0048691 positive regulation of axon extension involved in regeneration		CD markers	Vesicles(Supported)Nucleoplasm(Approved)	Antihemophilic Factor (Recombinant) (Receptor activity);Tenecteplase (Receptor activity);Coagulation Factor IX (Recombinant) (Receptor activity)	(M17761)ST WNT BETA CATENIN PATHWAY; (M159)PID AMB2 NEUTROPHILS PATHWAY; (M174)PID UPA UPAR PATHWAY	(M5946)HALLMARK COAGULATION; (M5921)HALLMARK COMPLEMENT; (M5930)HALLMARK EPITHELIAL MESENCHYMAL TRANSITION	1.0	0.0	1.0	1.0	1.0	0.0	0.0	0.0	0.0	0.0	1.0	1.0	0.0	1.0	0.0	0.0	0.0	0.0	1.0	1.0
LRRC2	79442	symbol	H. sapiens	79442	H. sapiens	LRRC2	leucine rich repeat containing 2								0.0	0.0	0.0	0.0	0.0	0.0	0.0	0.0	0.0	0.0	0.0	0.0	0.0	0.0	0.0	0.0	0.0	0.0	0.0	0.0
LRRC25	126364	symbol	H. sapiens	126364	H. sapiens	LRRC25	leucine rich repeat containing 25								0.0	0.0	0.0	0.0	0.0	0.0	0.0	0.0	0.0	0.0	0.0	0.0	0.0	0.0	0.0	0.0	0.0	0.0	0.0	0.0
LRRC8E	80131	symbol	H. sapiens	80131	H. sapiens	LRRC8E	leucine rich repeat containing 8 VRAC subunit E	GO:0015810 aspartate transmembrane transport;GO:0015740 C4-dicarboxylate transport;GO:0015800 acidic amino acid transport		Transporters/Transporter channels and pores					0.0	0.0	0.0	0.0	0.0	0.0	0.0	0.0	0.0	0.0	0.0	0.0	0.0	0.0	0.0	0.0	0.0	0.0	0.0	0.0
LRRFIP1	9208	symbol	H. sapiens	9208	H. sapiens	LRRFIP1	LRR binding FLII interacting protein 1	GO:0032481 positive regulation of type I interferon production;GO:0051092 positive regulation of NF-kappaB transcription factor activity;GO:0032479 regulation of type I interferon production		Transcription factors/Yet undefined DNA-binding domains	Cytosol(Supported)				0.0	0.0	0.0	1.0	0.0	0.0	0.0	0.0	0.0	0.0	0.0	0.0	0.0	0.0	0.0	0.0	0.0	0.0	0.0	0.0
LRRK1	79705	symbol	H. sapiens	79705	H. sapiens	LRRK1	leucine rich repeat kinase 1	GO:0036035 osteoclast development;GO:0050732 negative regulation of peptidyl-tyrosine phosphorylation;GO:0030316 osteoclast differentiation	TKL Ser/Thr protein kinase family	Enzymes/{ENZYME proteins/Transferases,Kinases/TKL Ser/Thr protein kinases}	Cytosol(Supported)Mitochondria(Approved)				0.0	0.0	1.0	0.0	0.0	0.0	0.0	0.0	0.0	0.0	0.0	0.0	0.0	0.0	0.0	0.0	0.0	0.0	1.0	0.0
LSP1	4046	symbol	H. sapiens	4046	H. sapiens	LSP1	lymphocyte specific protein 1	GO:0006968 cellular defense response;GO:0006952 defense response;GO:0006950 response to stress			Plasma membrane(Supported)		(M199)PID P38 MK2 PATHWAY	(M5938)HALLMARK REACTIVE OXIGEN SPECIES PATHWAY; (M5909)HALLMARK MYOGENESIS	0.0	0.0	0.0	0.0	0.0	0.0	0.0	0.0	0.0	0.0	0.0	0.0	1.0	0.0	0.0	0.0	0.0	0.0	0.0	0.0
LTB	4050	symbol	H. sapiens	4050	H. sapiens	LTB	lymphotoxin beta	GO:0045084 positive regulation of interleukin-12 biosynthetic process;GO:0045075 regulation of interleukin-12 biosynthetic process;GO:0042090 interleukin-12 biosynthetic process			Centrosome(Approved)		(M5883)NABA SECRETED FACTORS; (M5885)NABA MATRISOME ASSOCIATED; (M5889)NABA MATRISOME	(M5897)HALLMARK IL6 JAK STAT3 SIGNALING; (M5947)HALLMARK IL2 STAT5 SIGNALING; (M5950)HALLMARK ALLOGRAFT REJECTION	0.0	1.0	0.0	1.0	0.0	0.0	0.0	0.0	0.0	0.0	0.0	0.0	1.0	0.0	0.0	1.0	0.0	0.0	0.0	0.0
LTB4R	1241	symbol	H. sapiens	1241	H. sapiens	LTB4R	leukotriene B4 receptor	GO:0061737 leukotriene signaling pathway;GO:0007200 phospholipase C-activating G protein-coupled receptor signaling pathway;GO:0007218 neuropeptide signaling pathway		G-protein coupled receptors/{Adenosine and adenine nucleotide receptors,GPCRs excl olfactory receptors};Transporters					0.0	0.0	0.0	0.0	0.0	0.0	0.0	0.0	0.0	0.0	0.0	0.0	0.0	0.0	0.0	0.0	0.0	0.0	0.0	0.0
LTB4R2	56413	symbol	H. sapiens	56413	H. sapiens	LTB4R2	leukotriene B4 receptor 2	GO:0061737 leukotriene signaling pathway;GO:0051546 keratinocyte migration;GO:0007194 negative regulation of adenylate cyclase activity		G-protein coupled receptors/{Adenosine and adenine nucleotide receptors,GPCRs excl olfactory receptors}	Plasma membrane(Supported)Nucleoplasm(Uncertain)				0.0	0.0	0.0	0.0	1.0	0.0	0.0	0.0	0.0	0.0	0.0	0.0	0.0	0.0	0.0	0.0	0.0	0.0	0.0	0.0
LTBP2	4053	symbol	H. sapiens	4053	H. sapiens	LTBP2	latent transforming growth factor beta binding protein 2	GO:0007179 transforming growth factor beta receptor signaling pathway;GO:0071560 cellular response to transforming growth factor beta stimulus;GO:0071559 response to transforming growth factor beta			Nucleus(Approved)		(M3008)NABA ECM GLYCOPROTEINS; (M5884)NABA CORE MATRISOME; (M5889)NABA MATRISOME	(M5896)HALLMARK TGF BETA SIGNALING	0.0	0.0	0.0	1.0	0.0	0.0	0.0	0.0	0.0	0.0	0.0	1.0	0.0	0.0	0.0	0.0	0.0	0.0	0.0	0.0
LTBP3	4054	symbol	H. sapiens	4054	H. sapiens	LTBP3	latent transforming growth factor beta binding protein 3	GO:1902462 positive regulation of mesenchymal stem cell proliferation;GO:2000741 positive regulation of mesenchymal stem cell differentiation;GO:1902460 regulation of mesenchymal stem cell proliferation			Nucleoplasm(Approved)		(M3008)NABA ECM GLYCOPROTEINS; (M5884)NABA CORE MATRISOME; (M5889)NABA MATRISOME		0.0	0.0	0.0	0.0	0.0	0.0	0.0	0.0	0.0	0.0	0.0	1.0	0.0	0.0	0.0	0.0	0.0	0.0	1.0	0.0
LTBR	4055	symbol	H. sapiens	4055	H. sapiens	LTBR	lymphotoxin beta receptor	GO:0043011 myeloid dendritic cell differentiation;GO:2001238 positive regulation of extrinsic apoptotic signaling pathway;GO:0046330 positive regulation of JNK cascade			Golgi apparatus(Supported)			(M5897)HALLMARK IL6 JAK STAT3 SIGNALING	1.0	1.0	1.0	0.0	0.0	0.0	0.0	0.0	0.0	0.0	0.0	0.0	1.0	0.0	0.0	0.0	0.0	0.0	1.0	0.0
LTF	4057	symbol	H. sapiens	4057	H. sapiens	LTF	lactotransferrin	GO:0033214 iron assimilation by chelation and transport;GO:1900159 positive regulation of bone mineralization involved in bone maturation;GO:0034145 positive regulation of toll-like receptor 4 signaling pathway				3h-Indole-5,6-Diol (Serine-type endopeptidase activity);Lauric Acid (Serine-type endopeptidase activity);Nitrilotriacetic Acid (Serine-type endopeptidase activity);Alpha-D-Fucose (Serine-type endopeptidase activity);Nimesulide (Serine-type endopeptidase activity);2-(4-(2-HYDROXY-3-(ISOPROPYLAMINO)PROPOXY)PHENYL)ETHANAMIDE (Serine-type endopeptidase activity);Parecoxib (Serine-type endopeptidase a…		(M5921)HALLMARK COMPLEMENT; (M5907)HALLMARK ESTROGEN RESPONSE LATE	1.0	0.0	1.0	1.0	0.0	0.0	1.0	1.0	1.0	0.0	1.0	0.0	0.0	0.0	0.0	0.0	0.0	0.0	1.0	0.0
LY75	4065	symbol	H. sapiens	4065	H. sapiens	LY75	lymphocyte antigen 75	GO:0006954 inflammatory response;GO:0006897 endocytosis;GO:0098657 import into cell		CD markers	Golgi apparatus(Approved)			(M5950)HALLMARK ALLOGRAFT REJECTION	0.0	0.0	0.0	0.0	0.0	0.0	0.0	0.0	0.0	0.0	0.0	0.0	0.0	0.0	0.0	0.0	0.0	0.0	0.0	0.0
LY9	4063	symbol	H. sapiens	4063	H. sapiens	LY9	lymphocyte antigen 9	GO:0072540 T-helper 17 cell lineage commitment;GO:0002295 T-helper cell lineage commitment;GO:0072539 T-helper 17 cell differentiation		CD markers					1.0	0.0	1.0	1.0	0.0	1.0	0.0	0.0	0.0	1.0	0.0	0.0	0.0	0.0	0.0	0.0	0.0	0.0	0.0	0.0
LY96	23643	symbol	H. sapiens	23643	H. sapiens	LY96	lymphocyte antigen 96	GO:0034128 negative regulation of MyD88-independent toll-like receptor signaling pathway;GO:0034127 regulation of MyD88-independent toll-like receptor signaling pathway;GO:0035666 TRIF-dependent toll-like receptor signaling pathway			Vesicles(Approved)	3-Hydroxy-Myristic Acid (Lipopolysaccharide receptor activity);Lauric Acid (Lipopolysaccharide receptor activity);MYRISTIC ACID (Lipopolysaccharide receptor activity)	(M264)PID TOLL ENDOGENOUS PATHWAY	(M5953)HALLMARK KRAS SIGNALING UP	0.0	0.0	0.0	1.0	0.0	0.0	1.0	1.0	1.0	0.0	1.0	0.0	1.0	1.0	1.0	0.0	0.0	0.0	0.0	0.0
LYL1	4066	symbol	H. sapiens	4066	H. sapiens	LYL1	LYL1 basic helix-loop-helix family member	GO:0001955 blood vessel maturation;GO:0060216 definitive hemopoiesis;GO:0030183 B cell differentiation		Transcription factors/Basic domains	Golgi apparatus(Approved)				0.0	0.0	1.0	0.0	0.0	0.0	0.0	0.0	0.0	0.0	0.0	0.0	0.0	0.0	0.0	0.0	0.0	0.0	0.0	0.0
LYN	4067	symbol	H. sapiens	4067	H. sapiens	LYN	LYN proto-oncogene, Src family tyrosine kinase	GO:0034136 negative regulation of toll-like receptor 2 signaling pathway;GO:0034144 negative regulation of toll-like receptor 4 signaling pathway;GO:0034135 regulation of toll-like receptor 2 signaling pathway	Tyr protein kinase family	Enzymes/{ENZYME proteins/Transferases,Kinases/Tyr protein kinases}	Golgi apparatus;Plasma membrane;Vesicles(Supported)	1-Tert-Butyl-3-(4-Chloro-Phenyl)-1h-Pyrazolo[3,4-D]Pyrimidin-4-Ylamine (Receptor signaling protein tyrosine kinase activity);Bosutinib (Receptor signaling protein tyrosine kinase activity);Ponatinib (Receptor signaling protein tyrosine kinase activity);Nintedanib (Receptor signaling protein tyrosine kinase activity)	(M135)PID IL5 PATHWAY; (M17200)SA B CELL RECEPTOR COMPLEXES; (M33)PID GLYPICAN 1PATHWAY	(M5916)HALLMARK APICAL SURFACE; (M5941)HALLMARK UV RESPONSE UP; (M5932)HALLMARK INFLAMMATORY RESPONSE	1.0	1.0	1.0	1.0	1.0	1.0	1.0	1.0	1.0	0.0	1.0	0.0	1.0	1.0	1.0	0.0	0.0	0.0	1.0	1.0
LYVE1	10894	symbol	H. sapiens	10894	H. sapiens	LYVE1	lymphatic vessel endothelial hyaluronan receptor 1	GO:0030214 hyaluronan catabolic process;GO:0030212 hyaluronan metabolic process;GO:0006027 glycosaminoglycan catabolic process							0.0	0.0	0.0	0.0	0.0	0.0	0.0	0.0	0.0	0.0	0.0	0.0	0.0	0.0	0.0	0.0	0.0	0.0	0.0	1.0
LYZ	4069	symbol	H. sapiens	4069	H. sapiens	LYZ	lysozyme	GO:0043312 neutrophil degranulation;GO:0002283 neutrophil activation involved in immune response;GO:0001895 retina homeostasis		Enzymes/ENZYME proteins/Hydrolases	Golgi apparatus(Supported)Actin filaments;Nucleoplasm(Uncertain)	L-Aspartic Acid (Lysozyme activity);(R)-Propylene glycol (Lysozyme activity);Cu-Bicyclam (Lysozyme activity);4-Methylumbelliferyl Chitobiose (Lysozyme activity);Sucrose (Lysozyme activity);Arsanilic acid (Lysozyme activity);Di(N-Acetyl-D-Glucosamine) (Lysozyme activity);Para-Toluene Sulfonate (Lysozyme activity);1-Proponol (Lysozyme activity);Cu-Cyclam (Lysozyme activity);3-Aminosuccinimide (Lyso…	(M195)PID CMYB PATHWAY		1.0	0.0	0.0	0.0	0.0	0.0	0.0	1.0	0.0	0.0	0.0	0.0	0.0	0.0	0.0	0.0	0.0	0.0	0.0	0.0
LZTS1	11178	symbol	H. sapiens	11178	H. sapiens	LZTS1	leucine zipper tumor suppressor 1	GO:0016242 negative regulation of macroautophagy;GO:0048814 regulation of dendrite morphogenesis;GO:0050773 regulation of dendrite development			Nucleoli;Plasma membrane(Approved)				0.0	0.0	0.0	0.0	0.0	0.0	0.0	0.0	0.0	0.0	0.0	0.0	0.0	0.0	0.0	0.0	0.0	0.0	0.0	0.0
MAATS1	89876	gene_synonym	H. sapiens	89876	H. sapiens	CFAP91	cilia and flagella associated protein 91	GO:0003341 cilium movement;GO:0007018 microtubule-based movement;GO:0007017 microtubule-based process							0.0	0.0	0.0	0.0	0.0	0.0	0.0	0.0	0.0	0.0	0.0	0.0	0.0	0.0	0.0	0.0	0.0	0.0	0.0	0.0
MACC1	346389	symbol	H. sapiens	346389	H. sapiens	MACC1	MET transcriptional regulator MACC1	GO:0051781 positive regulation of cell division;GO:0051302 regulation of cell division;GO:0045944 positive regulation of transcription by RNA polymerase II			Mitochondria(Approved)				0.0	0.0	0.0	0.0	0.0	0.0	0.0	0.0	0.0	0.0	0.0	0.0	0.0	0.0	0.0	0.0	0.0	0.0	0.0	0.0
MAF	4094	symbol	H. sapiens	4094	H. sapiens	MAF	MAF bZIP transcription factor	GO:0070306 lens fiber cell differentiation;GO:0032330 regulation of chondrocyte differentiation;GO:0002088 lens development in camera-type eye		Transcription factors/Basic domains			(M60)PID NFAT TFPATHWAY; (M167)PID AP1 PATHWAY; (M195)PID CMYB PATHWAY	(M5908)HALLMARK ANDROGEN RESPONSE	0.0	0.0	0.0	0.0	0.0	0.0	0.0	0.0	0.0	0.0	0.0	0.0	1.0	0.0	0.0	0.0	0.0	0.0	0.0	0.0
MAFB	9935	symbol	H. sapiens	9935	H. sapiens	MAFB	MAF bZIP transcription factor B	GO:0021599 abducens nerve formation;GO:0021598 abducens nerve morphogenesis;GO:0021572 rhombomere 6 development		Transcription factors/Basic domains	Cytosol;Golgi apparatus;Nucleoli;Nucleus(Approved)			(M5957)HALLMARK PANCREAS BETA CELLS; (M5953)HALLMARK KRAS SIGNALING UP	0.0	0.0	1.0	0.0	0.0	0.0	0.0	0.0	0.0	0.0	1.0	0.0	0.0	0.0	0.0	0.0	0.0	0.0	1.0	0.0
MAFK	7975	symbol	H. sapiens	7975	H. sapiens	MAFK	MAF bZIP transcription factor K	GO:0007596 blood coagulation;GO:0007599 hemostasis;GO:0000122 negative regulation of transcription by RNA polymerase II		Transcription factors/Basic domains	Nucleoplasm(Enhanced)				0.0	0.0	0.0	0.0	0.0	0.0	0.0	0.0	0.0	0.0	0.0	0.0	0.0	0.0	0.0	0.0	0.0	0.0	0.0	1.0
MALT1	10892	symbol	H. sapiens	10892	H. sapiens	MALT1	MALT1 paracaspase	GO:2000321 positive regulation of T-helper 17 cell differentiation;GO:2000319 regulation of T-helper 17 cell differentiation;GO:0045624 positive regulation of T-helper cell differentiation		Enzymes/Peptidases/Cysteine-type peptidases	Cytosol;Nucleoli(Supported)		(M37)PID NFKAPPAB CANONICAL PATHWAY; (M88)PID CD8 TCR PATHWAY; (M10)PID BCR 5PATHWAY		1.0	0.0	1.0	1.0	0.0	1.0	1.0	1.0	1.0	1.0	0.0	0.0	1.0	0.0	1.0	0.0	0.0	0.0	0.0	0.0
MAMDC4	158056	symbol	H. sapiens	158056	H. sapiens	MAMDC4	MAM domain containing 4	GO:0015031 protein transport;GO:0015833 peptide transport;GO:0042886 amide transport			Cytosol;Nucleoplasm(Approved)				0.0	0.0	0.0	0.0	0.0	0.0	0.0	0.0	0.0	0.0	0.0	0.0	0.0	0.0	0.0	0.0	0.0	0.0	0.0	0.0
MAN1A1	4121	symbol	H. sapiens	4121	H. sapiens	MAN1A1	mannosidase alpha class 1A member 1	GO:1904381 Golgi apparatus mannose trimming;GO:0036508 protein alpha-1,2-demannosylation;GO:0036507 protein demannosylation		Enzymes/ENZYME proteins/Hydrolases	Golgi apparatus(Supported)			(M5934)HALLMARK XENOBIOTIC METABOLISM	0.0	0.0	0.0	0.0	0.0	0.0	0.0	0.0	0.0	0.0	0.0	0.0	0.0	0.0	0.0	0.0	0.0	0.0	0.0	0.0
MAN1C1	57134	symbol	H. sapiens	57134	H. sapiens	MAN1C1	mannosidase alpha class 1C member 1	GO:1904381 Golgi apparatus mannose trimming;GO:0036508 protein alpha-1,2-demannosylation;GO:0036507 protein demannosylation		Enzymes/ENZYME proteins/Hydrolases	Nucleus;Vesicles(Uncertain)				0.0	0.0	0.0	0.0	0.0	0.0	0.0	0.0	0.0	0.0	0.0	0.0	0.0	0.0	0.0	0.0	0.0	0.0	0.0	0.0
MAN2A1	4124	symbol	H. sapiens	4124	H. sapiens	MAN2A1	mannosidase alpha class 2A member 1	GO:0006013 mannose metabolic process;GO:0060042 retina morphogenesis in camera-type eye;GO:0048286 lung alveolus development		Enzymes/ENZYME proteins/Hydrolases	Golgi apparatus(Supported)	Swainsonine (Zinc ion binding);2-Deoxy-2-Fluoro-Alpha-D-Mannosyl Fluoride (Zinc ion binding);Ghavamiol (Zinc ion binding);Kifunensine (Zinc ion binding);5-Fluoro-Beta-L-Gulosyl Fluoride (Zinc ion binding);5-Thio-a/B-D-Mannopyranosylamine (Zinc ion binding);1-deoxymannojirimycin (Zinc ion binding);(1R,2R,3R,4S,5R)-4-(BENZYLAMINO)-5-(METHYLTHIO)CYCLOPENTANE-1,2,3-TRIOL (Zinc ion binding);(1S,2S,3R,…			0.0	0.0	0.0	0.0	0.0	0.0	0.0	0.0	0.0	0.0	0.0	0.0	0.0	0.0	0.0	0.0	0.0	0.0	0.0	0.0
MAN2B1	4125	symbol	H. sapiens	4125	H. sapiens	MAN2B1	mannosidase alpha class 2B member 1	GO:0006013 mannose metabolic process;GO:0043312 neutrophil degranulation;GO:0009313 oligosaccharide catabolic process		Enzymes/ENZYME proteins/Hydrolases	Vesicles(Supported)Nucleoplasm(Uncertain)				1.0	0.0	0.0	0.0	0.0	0.0	0.0	0.0	0.0	0.0	0.0	0.0	0.0	0.0	0.0	0.0	0.0	0.0	0.0	0.0
MANBA	4126	symbol	H. sapiens	4126	H. sapiens	MANBA	mannosidase beta	GO:0043312 neutrophil degranulation;GO:0009313 oligosaccharide catabolic process;GO:0006516 glycoprotein catabolic process		Enzymes/ENZYME proteins/Hydrolases	Vesicles(Supported)				1.0	0.0	0.0	0.0	0.0	0.0	0.0	0.0	0.0	0.0	0.0	0.0	0.0	0.0	0.0	0.0	0.0	0.0	0.0	0.0
MAP2K3	5606	symbol	H. sapiens	5606	H. sapiens	MAP2K3	mitogen-activated protein kinase kinase 3	GO:0043536 positive regulation of blood vessel endothelial cell migration;GO:0000187 activation of MAPK activity;GO:0010595 positive regulation of endothelial cell migration	STE Ser/Thr protein kinase family	Enzymes/{ENZYME proteins/Transferases,Kinases/STE Ser/Thr protein kinases}	Cytosol;Nucleoplasm(Supported)		(M209)PID P38 GAMMA DELTA PATHWAY; (M267)PID ANTHRAX PATHWAY; (M20)PID P38 MKK3 6PATHWAY	(M5923)HALLMARK PI3K AKT MTOR SIGNALING; (M5945)HALLMARK HEME METABOLISM; (M5924)HALLMARK MTORC1 SIGNALING	0.0	1.0	0.0	1.0	1.0	0.0	0.0	0.0	0.0	0.0	0.0	0.0	1.0	0.0	0.0	0.0	0.0	1.0	0.0	0.0
MAP3K6	9064	symbol	H. sapiens	9064	H. sapiens	MAP3K6	mitogen-activated protein kinase kinase kinase 6	GO:0007257 activation of JUN kinase activity;GO:0043507 positive regulation of JUN kinase activity;GO:0000186 activation of MAPKK activity	STE Ser/Thr protein kinase family	Enzymes/{ENZYME proteins/Transferases,Kinases/STE Ser/Thr protein kinases}	Actin filaments;Cytosol;Nucleus;Plasma membrane(Approved)		(M20)PID P38 MKK3 6PATHWAY	(M5928)HALLMARK MYC TARGETS V2	0.0	0.0	0.0	0.0	0.0	0.0	0.0	0.0	0.0	0.0	0.0	0.0	0.0	0.0	0.0	0.0	0.0	0.0	0.0	0.0
MAP3K8	1326	symbol	H. sapiens	1326	H. sapiens	MAP3K8	mitogen-activated protein kinase kinase kinase 8	GO:0031295 T cell costimulation;GO:0000186 activation of MAPKK activity;GO:0031294 lymphocyte costimulation	STE Ser/Thr protein kinase family	Enzymes/{ENZYME proteins/Transferases,Kinases/STE Ser/Thr protein kinases}	Cytosol(Supported)		(M190)PID TCR JNK PATHWAY; (M134)PID TCR RAS PATHWAY; (M4910)ST ERK1 ERK2 MAPK PATHWAY	(M5897)HALLMARK IL6 JAK STAT3 SIGNALING; (M5947)HALLMARK IL2 STAT5 SIGNALING; (M5890)HALLMARK TNFA SIGNALING VIA NFKB	0.0	1.0	1.0	0.0	0.0	0.0	0.0	0.0	0.0	0.0	0.0	0.0	0.0	0.0	1.0	0.0	0.0	1.0	0.0	0.0
MAP4K1	11184	symbol	H. sapiens	11184	H. sapiens	MAP4K1	mitogen-activated protein kinase kinase kinase kinase 1	GO:0007257 activation of JUN kinase activity;GO:0000185 activation of MAPKKK activity;GO:1904628 cellular response to phorbol 13-acetate 12-myristate	STE Ser/Thr protein kinase family	Enzymes/{ENZYME proteins/Transferases,Kinases/STE Ser/Thr protein kinases}	Nucleoplasm;Plasma membrane(Uncertain)		(M190)PID TCR JNK PATHWAY; (M1718)SIG IL4RECEPTOR IN B LYPHOCYTES; (M8626)SIG BCR SIGNALING PATHWAY	(M5950)HALLMARK ALLOGRAFT REJECTION; (M5953)HALLMARK KRAS SIGNALING UP	0.0	0.0	0.0	0.0	0.0	0.0	0.0	1.0	0.0	0.0	0.0	0.0	0.0	0.0	0.0	0.0	0.0	0.0	0.0	0.0
MAPK13	5603	symbol	H. sapiens	5603	H. sapiens	MAPK13	mitogen-activated protein kinase 13	GO:0072740 cellular response to anisomycin;GO:1903936 cellular response to sodium arsenite;GO:0072709 cellular response to sorbitol	CMGC Ser/Thr protein kinase family	Enzymes/{ENZYME proteins/Transferases,Kinases/CMGC Ser/Thr protein kinases}	Cytosol;Nucleoli;Nucleus(Approved)	KC706 (Protein serine/threonine kinase activity)	(M209)PID P38 GAMMA DELTA PATHWAY; (M12705)SIG CD40PATHWAYMAP; (M12012)ST P38 MAPK PATHWAY	(M5915)HALLMARK APICAL JUNCTION; (M5907)HALLMARK ESTROGEN RESPONSE LATE	0.0	0.0	0.0	1.0	0.0	0.0	0.0	0.0	1.0	0.0	0.0	0.0	1.0	1.0	0.0	0.0	1.0	1.0	0.0	0.0
MAPKAPK2	9261	symbol	H. sapiens	9261	H. sapiens	MAPKAPK2	MAPK activated protein kinase 2	GO:0070935 3'-UTR-mediated mRNA stabilization;GO:0042535 positive regulation of tumor necrosis factor biosynthetic process;GO:0048255 mRNA stabilization	CAMK Ser/Thr protein kinase family	Enzymes/{ENZYME proteins/Transferases,Kinases/CAMK Ser/Thr protein kinases}	Centrosome;Nucleoplasm(Supported)	Staurosporine (Signal transducer activity);3-{[(1R)-1-phenylethyl]amino}-4-(pyridin-4-ylamino)cyclobut-3-ene-1,2-dione (Signal transducer activity);(4R)-N-[4-({[2-(DIMETHYLAMINO)ETHYL]AMINO}CARBONYL)-1,3-THIAZOL-2-YL]-4-METHYL-1-OXO-2,3,4,9-TETRAHYDRO-1H-BETA-CARBOLINE-6-CARBOXAMIDE (Signal transducer activity);(10R)-10-methyl-3-(6-methylpyridin-3-yl)-9,10,11,12-tetrahydro-8H-[1,4]diazepino[5',6'…	(M199)PID P38 MK2 PATHWAY; (M270)PID MAPK TRK PATHWAY; (M12012)ST P38 MAPK PATHWAY	(M5947)HALLMARK IL2 STAT5 SIGNALING	0.0	1.0	0.0	1.0	0.0	0.0	1.0	1.0	1.0	0.0	0.0	0.0	0.0	0.0	0.0	0.0	0.0	0.0	0.0	0.0
MARCO	8685	symbol	H. sapiens	8685	H. sapiens	MARCO	macrophage receptor with collagenous structure	GO:0043277 apoptotic cell clearance;GO:0070374 positive regulation of ERK1 and ERK2 cascade;GO:0007193 adenylate cyclase-inhibiting G protein-coupled receptor signaling pathway			Golgi apparatus;Vesicles(Approved)			(M5932)HALLMARK INFLAMMATORY RESPONSE	0.0	0.0	0.0	0.0	0.0	0.0	0.0	0.0	0.0	0.0	0.0	0.0	1.0	0.0	0.0	0.0	0.0	0.0	0.0	0.0
MBD4	8930	symbol	H. sapiens	8930	H. sapiens	MBD4	methyl-CpG binding domain 4, DNA glycosylase	GO:0045008 depyrimidination;GO:0009223 pyrimidine deoxyribonucleotide catabolic process;GO:0006244 pyrimidine nucleotide catabolic process			Nuclear speckles(Supported)				0.0	0.0	0.0	0.0	0.0	0.0	0.0	0.0	0.0	0.0	0.0	0.0	0.0	0.0	0.0	0.0	0.0	0.0	0.0	0.0
MC1R	4157	symbol	H. sapiens	4157	H. sapiens	MC1R	melanocortin 1 receptor	GO:0070914 UV-damage excision repair;GO:0090037 positive regulation of protein kinase C signaling;GO:0010739 positive regulation of protein kinase A signaling		G-protein coupled receptors/GPCRs excl olfactory receptors		Afamelanotide (Ubiquitin protein ligase binding);CZEN 002 (Ubiquitin protein ligase binding)			0.0	0.0	0.0	1.0	0.0	0.0	0.0	0.0	0.0	0.0	0.0	0.0	0.0	0.0	0.0	0.0	0.0	0.0	0.0	0.0
MCEMP1	199675	symbol	H. sapiens	199675	H. sapiens	MCEMP1	mast cell expressed membrane protein 1	GO:0043312 neutrophil degranulation;GO:0002283 neutrophil activation involved in immune response;GO:0042119 neutrophil activation							1.0	0.0	0.0	0.0	0.0	0.0	0.0	0.0	0.0	0.0	0.0	0.0	0.0	0.0	0.0	0.0	0.0	0.0	0.0	0.0
MCOLN2	255231	symbol	H. sapiens	255231	H. sapiens	MCOLN2	mucolipin 2	GO:0071642 positive regulation of macrophage inflammatory protein 1 alpha production;GO:0071651 positive regulation of chemokine (C-C motif) ligand 5 production;GO:0035926 chemokine (C-C motif) ligand 2 secretion		Transporters/Transporter channels and pores;Voltage-gated ion channels/Transient Receptor Potential Channels	Intermediate filaments(Supported)				0.0	0.0	0.0	1.0	1.0	1.0	0.0	0.0	0.0	0.0	0.0	0.0	0.0	0.0	0.0	0.0	0.0	0.0	0.0	0.0
MCTP2	55784	symbol	H. sapiens	55784	H. sapiens	MCTP2	multiple C2 and transmembrane domain containing 2	GO:0046928 regulation of neurotransmitter secretion;GO:0007269 neurotransmitter secretion;GO:0099643 signal release from synapse			Cytosol;Nucleoplasm(Enhanced)				0.0	0.0	0.0	1.0	0.0	0.0	0.0	0.0	0.0	0.0	0.0	0.0	0.0	0.0	0.0	0.0	0.0	0.0	0.0	0.0
MEDAG	84935	symbol	H. sapiens	84935	H. sapiens	MEDAG	mesenteric estrogen dependent adipogenesis	GO:0045600 positive regulation of fat cell differentiation;GO:0045598 regulation of fat cell differentiation;GO:0045444 fat cell differentiation							0.0	0.0	0.0	0.0	0.0	0.0	0.0	0.0	0.0	0.0	0.0	0.0	0.0	0.0	0.0	0.0	0.0	0.0	0.0	0.0
MEFV	4210	symbol	H. sapiens	4210	H. sapiens	MEFV	MEFV innate immuity regulator, pyrin	GO:0071641 negative regulation of macrophage inflammatory protein 1 alpha production;GO:1900226 negative regulation of NLRP3 inflammasome complex assembly;GO:0071640 regulation of macrophage inflammatory protein 1 alpha production						(M5956)HALLMARK KRAS SIGNALING DN; (M5932)HALLMARK INFLAMMATORY RESPONSE	0.0	0.0	0.0	1.0	0.0	0.0	0.0	0.0	0.0	0.0	0.0	0.0	0.0	1.0	0.0	0.0	0.0	0.0	0.0	0.0
MET	4233	symbol	H. sapiens	4233	H. sapiens	MET	MET proto-oncogene, receptor tyrosine kinase	GO:1901299 negative regulation of hydrogen peroxide-mediated programmed cell death;GO:0035635 entry of bacterium into host cell;GO:2001028 positive regulation of endothelial cell chemotaxis	Tyr protein kinase family	Enzymes/{ENZYME proteins/Transferases,Kinases/Tyr protein kinases};RAS pathway related proteins	Cytosol;Plasma membrane(Supported)	K-252a (Protein tyrosine kinase activity);XL184 (Protein tyrosine kinase activity);MP470 (Protein tyrosine kinase activity);1-(4-fluorophenyl)-N-[3-fluoro-4-(1H-pyrrolo[2,3-b]pyridin-4-yloxy)phenyl]-2-oxo-1,2-dihydropyridine-3-carboxamide (Protein tyrosine kinase activity);N-({4-[(2-aminopyridin-4-yl)oxy]-3-fluorophenyl}carbamoyl)-2-(4-fluorophenyl)acetamide (Protein tyrosine kinase activity);2-(…	(M86)PID ARF6 PATHWAY; (M232)PID ECADHERIN STABILIZATION PATHWAY; (M91)PID TCPTP PATHWAY	(M5942)HALLMARK UV RESPONSE DN; (M5932)HALLMARK INFLAMMATORY RESPONSE; (M5937)HALLMARK GLYCOLYSIS	0.0	1.0	0.0	0.0	1.0	0.0	0.0	0.0	0.0	0.0	0.0	0.0	0.0	1.0	0.0	0.0	0.0	0.0	0.0	1.0
METRNL	284207	symbol	H. sapiens	284207	H. sapiens	METRNL	meteorin like, glial cell differentiation regulator	GO:0090336 positive regulation of brown fat cell differentiation;GO:0090335 regulation of brown fat cell differentiation;GO:0014850 response to muscle activity							0.0	0.0	0.0	0.0	0.0	0.0	0.0	0.0	0.0	0.0	0.0	0.0	0.0	1.0	0.0	0.0	0.0	0.0	0.0	0.0
MFI2	4241	gene_synonym	H. sapiens	4241	H. sapiens	MELTF	melanotransferrin	GO:0010756 positive regulation of plasminogen activation;GO:0090091 positive regulation of extracellular matrix disassembly;GO:1900025 negative regulation of substrate adhesion-dependent cell spreading		CD markers					0.0	0.0	1.0	0.0	0.0	0.0	0.0	0.0	0.0	0.0	1.0	1.0	0.0	0.0	0.0	0.0	0.0	0.0	1.0	0.0
MFSD1	64747	symbol	H. sapiens	64747	H. sapiens	MFSD1	major facilitator superfamily domain containing 1	GO:0055085 transmembrane transport;GO:0006810 transport;GO:0051234 establishment of localization			Nucleoli;Nucleus(Approved)				0.0	0.0	0.0	0.0	0.0	0.0	0.0	0.0	0.0	0.0	0.0	0.0	0.0	0.0	0.0	0.0	0.0	0.0	0.0	0.0
MFSD6L	162387	symbol	H. sapiens	162387	H. sapiens	MFSD6L	major facilitator superfamily domain containing 6 like			Transporters/Electrochemical Potential-driven transporters					0.0	0.0	0.0	0.0	0.0	0.0	0.0	0.0	0.0	0.0	0.0	0.0	0.0	0.0	0.0	0.0	0.0	0.0	0.0	0.0
MFSD7	84179	gene_synonym	H. sapiens	84179	H. sapiens	SLC49A3	solute carrier family 49 member 3	GO:0051181 cofactor transport;GO:0055085 transmembrane transport;GO:0006810 transport							0.0	0.0	0.0	0.0	0.0	0.0	0.0	0.0	0.0	0.0	0.0	0.0	0.0	0.0	0.0	0.0	0.0	0.0	0.0	0.0
MGAT4A	11320	symbol	H. sapiens	11320	H. sapiens	MGAT4A	alpha-1,3-mannosyl-glycoprotein 4-beta-N-acetylglucosaminyltransferase A	GO:0006491 N-glycan processing;GO:0006487 protein N-linked glycosylation;GO:0043687 post-translational protein modification		Enzymes/ENZYME proteins/Transferases	Golgi apparatus(Approved)				0.0	0.0	0.0	0.0	0.0	0.0	0.0	0.0	0.0	0.0	0.0	0.0	0.0	0.0	0.0	0.0	0.0	0.0	0.0	0.0
MGAT4B	11282	symbol	H. sapiens	11282	H. sapiens	MGAT4B	alpha-1,3-mannosyl-glycoprotein 4-beta-N-acetylglucosaminyltransferase B	GO:0006491 N-glycan processing;GO:0006487 protein N-linked glycosylation;GO:0006486 protein glycosylation		Enzymes/ENZYME proteins/Transferases					0.0	0.0	0.0	0.0	0.0	0.0	0.0	0.0	0.0	0.0	0.0	0.0	0.0	0.0	0.0	0.0	0.0	0.0	0.0	0.0
MICALCL	84953	symbol	H. sapiens	84953	H. sapiens	MICALCL	MICAL C-terminal like	GO:0007283 spermatogenesis;GO:0048232 male gamete generation;GO:0007276 gamete generation		Enzymes/ENZYME proteins/Oxidoreductases	Golgi apparatus(Approved)				0.0	0.0	0.0	0.0	0.0	0.0	0.0	0.0	0.0	0.0	0.0	0.0	0.0	0.0	0.0	0.0	0.0	0.0	0.0	0.0
MICALL2	79778	symbol	H. sapiens	79778	H. sapiens	MICALL2	MICAL like 2	GO:1903955 positive regulation of protein targeting to mitochondrion;GO:1903214 regulation of protein targeting to mitochondrion;GO:1903749 positive regulation of establishment of protein localization to mitochondrion							0.0	0.0	0.0	1.0	0.0	0.0	0.0	0.0	0.0	0.0	0.0	0.0	0.0	0.0	0.0	0.0	0.0	0.0	0.0	0.0
MILR1	284021	symbol	H. sapiens	284021	H. sapiens	MILR1	mast cell immunoglobulin like receptor 1	GO:0033004 negative regulation of mast cell activation;GO:0043303 mast cell degranulation;GO:0002279 mast cell activation involved in immune response							1.0	0.0	1.0	0.0	0.0	0.0	0.0	0.0	0.0	0.0	1.0	0.0	0.0	0.0	0.0	0.0	0.0	0.0	0.0	0.0
MKNK1	8569	symbol	H. sapiens	8569	H. sapiens	MKNK1	MAPK interacting serine/threonine kinase 1	GO:0018105 peptidyl-serine phosphorylation;GO:0046777 protein autophosphorylation;GO:0006417 regulation of translation	CAMK Ser/Thr protein kinase family	Enzymes/{ENZYME proteins/Transferases,Kinases/CAMK Ser/Thr protein kinases}	Nucleoplasm(Supported)		(M4910)ST ERK1 ERK2 MAPK PATHWAY; (M12012)ST P38 MAPK PATHWAY; (M229)PID P38 ALPHA BETA DOWNSTREAM PATHWAY	(M5923)HALLMARK PI3K AKT MTOR SIGNALING	0.0	0.0	0.0	0.0	0.0	0.0	0.0	0.0	0.0	0.0	0.0	0.0	0.0	0.0	0.0	0.0	0.0	0.0	0.0	0.0
MLK4	84451	gene_synonym	H. sapiens	84451	H. sapiens	MAP3K21	mitogen-activated protein kinase kinase kinase 21	GO:0007257 activation of JUN kinase activity;GO:0043507 positive regulation of JUN kinase activity;GO:0000186 activation of MAPKK activity	STE Ser/Thr protein kinase family	Enzymes/{ENZYME proteins/Transferases,Kinases/STE Ser/Thr protein kinases}	Cytosol;Plasma membrane(Approved)				0.0	0.0	0.0	0.0	0.0	0.0	0.0	0.0	0.0	0.0	0.0	0.0	0.0	0.0	0.0	0.0	0.0	0.0	0.0	0.0
MLKL	197259	symbol	H. sapiens	197259	H. sapiens	MLKL	mixed lineage kinase domain like pseudokinase	GO:0070207 protein homotrimerization;GO:0070206 protein trimerization;GO:0070266 necroptotic process	Other	Enzymes/Kinases;Transporters/Transporter channels and pores					0.0	0.0	0.0	0.0	0.0	0.0	0.0	0.0	0.0	0.0	0.0	0.0	0.0	0.0	0.0	0.0	0.0	1.0	0.0	0.0
MLPH	79083	symbol	H. sapiens	79083	H. sapiens	MLPH	melanophilin	GO:0032402 melanosome transport;GO:0051904 pigment granule transport;GO:0032401 establishment of melanosome localization						(M5906)HALLMARK ESTROGEN RESPONSE EARLY	0.0	0.0	0.0	0.0	0.0	0.0	0.0	0.0	0.0	0.0	0.0	0.0	0.0	0.0	0.0	0.0	0.0	0.0	0.0	0.0
MME	4311	symbol	H. sapiens	4311	H. sapiens	MME	membrane metalloendopeptidase	GO:0002003 angiotensin maturation;GO:0002002 regulation of angiotensin levels in blood;GO:0001991 regulation of systemic arterial blood pressure by circulatory renin-angiotensin		CD markers;Enzymes/{ENZYME proteins/Hydrolases,Peptidases/Metallopeptidases}		Candoxatril (Zinc ion binding);Omapatrilat (Zinc ion binding);N-[3-[(1-Aminoethyl)(Hydroxy)Phosphoryl]-2-(1,1'-Biphenyl-4-Ylmethyl)Propanoyl]Alanine (Zinc ion binding);Phosphoramidon (Zinc ion binding);N-(3-Phenyl-2-Sulfanylpropanoyl)Phenylalanylalanine (Zinc ion binding);[2(R,S)-2-Sulfanylheptanoyl]-Phe-Ala (Zinc ion binding);SLV 306 (Zinc ion binding);2-[(1S)-1-BENZYL-2-SULFANYLETHYL]-1H-IMIDAZ…			1.0	0.0	0.0	0.0	0.0	0.0	0.0	0.0	0.0	0.0	0.0	0.0	1.0	0.0	0.0	0.0	0.0	0.0	0.0	0.0
MMP14	4323	symbol	H. sapiens	4323	H. sapiens	MMP14	matrix metallopeptidase 14	GO:0045579 positive regulation of B cell differentiation;GO:0051895 negative regulation of focal adhesion assembly;GO:1905523 positive regulation of macrophage migration		Enzymes/{ENZYME proteins/Hydrolases,Peptidases/Metallopeptidases}	Cytosol;Intermediate filaments(Approved)	Marimastat (Zinc ion binding)	(M44)PID HIF2PATHWAY; (M281)PID FAK PATHWAY; (M3468)NABA ECM REGULATORS	(M5946)HALLMARK COAGULATION; (M5941)HALLMARK UV RESPONSE UP; (M5932)HALLMARK INFLAMMATORY RESPONSE	0.0	0.0	1.0	0.0	1.0	0.0	0.0	0.0	0.0	0.0	1.0	1.0	0.0	0.0	0.0	1.0	0.0	1.0	0.0	0.0
MMP19	4327	symbol	H. sapiens	4327	H. sapiens	MMP19	matrix metallopeptidase 19	GO:0001554 luteolysis;GO:0001542 ovulation from ovarian follicle;GO:0001541 ovarian follicle development		Enzymes/Peptidases/Metallopeptidases	Endoplasmic reticulum;Vesicles(Approved)	Marimastat (Zinc ion binding)	(M3468)NABA ECM REGULATORS; (M5885)NABA MATRISOME ASSOCIATED; (M5889)NABA MATRISOME		0.0	0.0	0.0	0.0	0.0	0.0	0.0	0.0	0.0	0.0	0.0	1.0	0.0	0.0	0.0	1.0	0.0	0.0	0.0	0.0
MMP7	4316	symbol	H. sapiens	4316	H. sapiens	MMP7	matrix metallopeptidase 7	GO:0044849 estrous cycle;GO:0022617 extracellular matrix disassembly;GO:0060135 maternal process involved in female pregnancy		Enzymes/{ENZYME proteins/Hydrolases,Peptidases/Metallopeptidases}	Nucleoplasm;Vesicles(Approved)	Marimastat (Zinc ion binding);(1R)-N,6-DIHYDROXY-7-METHOXY-2-[(4-METHOXYPHENYL)SULFONYL]-1,2,3,4-TETRAHYDROISOQUINOLINE-1-CARBOXAMIDE (Zinc ion binding);N4-HYDROXY-2-ISOBUTYL-N1-(9-OXO-1,8-DIAZA-TRICYCLO[10.6.1.013,18]NONADECA-12(19),13,15,17-TETRAEN-10-YL)-SUCCINAMIDE (Zinc ion binding);5-METHYL-3-(9-OXO-1,8-DIAZA-TRICYCLO[10.6.1.013,18]NONADECA-12(19),13,15,17-TETRAEN-10-YLCARBAMOYL)-HEXANOIC A…	(M198)PID SYNDECAN 1 PATHWAY; (M142)PID AJDISS 2PATHWAY; (M153)PID P75 NTR PATHWAY	(M5946)HALLMARK COAGULATION	0.0	0.0	0.0	0.0	0.0	0.0	0.0	0.0	0.0	0.0	0.0	1.0	0.0	0.0	0.0	1.0	0.0	0.0	0.0	0.0
MNDA	4332	symbol	H. sapiens	4332	H. sapiens	MNDA	myeloid cell nuclear differentiation antigen	GO:0030889 negative regulation of B cell proliferation;GO:0050869 negative regulation of B cell activation;GO:0050853 B cell receptor signaling pathway			Nucleoli;Nucleoplasm(Supported)				1.0	0.0	1.0	1.0	0.0	0.0	1.0	0.0	1.0	0.0	1.0	0.0	0.0	0.0	0.0	0.0	0.0	0.0	0.0	0.0
MOB3C	148932	symbol	H. sapiens	148932	H. sapiens	MOB3C	MOB kinase activator 3C				Cytosol;Intermediate filaments(Uncertain)				0.0	0.0	0.0	0.0	0.0	0.0	0.0	0.0	0.0	0.0	0.0	0.0	0.0	0.0	0.0	0.0	0.0	0.0	0.0	0.0
MPEG1	219972	symbol	H. sapiens	219972	H. sapiens	MPEG1	macrophage expressed 1	GO:0035915 pore formation in membrane of other organism;GO:0051673 membrane disruption in other organism;GO:0050830 defense response to Gram-positive bacterium		Transporters/Transporter channels and pores					0.0	0.0	0.0	0.0	0.0	0.0	0.0	1.0	0.0	0.0	0.0	0.0	0.0	0.0	0.0	0.0	0.0	0.0	0.0	0.0
MPP1	4354	symbol	H. sapiens	4354	H. sapiens	MPP1	membrane palmitoylated protein 1	GO:0046710 GDP metabolic process;GO:0090022 regulation of neutrophil chemotaxis;GO:0046037 GMP metabolic process			Cytosol;Nuclear speckles;Nucleoli(Approved)			(M5945)HALLMARK HEME METABOLISM	0.0	0.0	0.0	0.0	1.0	0.0	0.0	0.0	0.0	0.0	0.0	0.0	0.0	0.0	0.0	0.0	0.0	0.0	0.0	0.0
MPZL3	196264	symbol	H. sapiens	196264	H. sapiens	MPZL3	myelin protein zero like 3	GO:0042633 hair cycle;GO:0042303 molting cycle;GO:0030198 extracellular matrix organization			Golgi apparatus(Approved)				0.0	0.0	0.0	0.0	0.0	0.0	0.0	0.0	0.0	0.0	0.0	1.0	0.0	0.0	0.0	0.0	0.0	0.0	0.0	0.0
MR1	3140	symbol	H. sapiens	3140	H. sapiens	MR1	major histocompatibility complex, class I-related	GO:0002474 antigen processing and presentation of peptide antigen via MHC class I;GO:0032620 interleukin-17 production;GO:0032611 interleukin-1 beta production			Plasma membrane(Supported)	Anti-thymocyte Globulin (Rabbit) (Peptide antigen binding)			0.0	0.0	0.0	0.0	0.0	1.0	0.0	1.0	0.0	0.0	0.0	0.0	1.0	0.0	0.0	0.0	0.0	0.0	0.0	0.0
MRC1	4360	symbol	H. sapiens	4360	H. sapiens	MRC1	mannose receptor C-type 1	GO:0046718 viral entry into host cell;GO:0030260 entry into host cell;GO:0071353 cellular response to interleukin-4		CD markers					0.0	0.0	0.0	0.0	0.0	0.0	0.0	1.0	0.0	0.0	0.0	0.0	1.0	0.0	1.0	0.0	0.0	0.0	0.0	0.0
MRC2	9902	symbol	H. sapiens	9902	H. sapiens	MRC2	mannose receptor C type 2	GO:0030574 collagen catabolic process;GO:0032963 collagen metabolic process;GO:0001649 osteoblast differentiation		CD markers					0.0	0.0	0.0	0.0	0.0	0.0	0.0	0.0	0.0	0.0	0.0	0.0	1.0	0.0	1.0	0.0	0.0	0.0	0.0	0.0
MROH6	642475	symbol	H. sapiens	642475	H. sapiens	MROH6	maestro heat like repeat family member 6				Nucleus(Approved)				0.0	0.0	0.0	0.0	0.0	0.0	0.0	0.0	0.0	0.0	0.0	0.0	0.0	0.0	0.0	0.0	0.0	0.0	0.0	0.0
MROH7	374977	symbol	H. sapiens	374977	H. sapiens	MROH7	maestro heat like repeat family member 7								0.0	0.0	0.0	0.0	0.0	0.0	0.0	0.0	0.0	0.0	0.0	0.0	0.0	0.0	0.0	0.0	0.0	0.0	0.0	0.0
MS4A14	84689	symbol	H. sapiens	84689	H. sapiens	MS4A14	membrane spanning 4-domains A14			Transporters/Transporter channels and pores					0.0	0.0	0.0	0.0	0.0	0.0	0.0	0.0	0.0	0.0	0.0	0.0	0.0	0.0	0.0	0.0	0.0	0.0	0.0	0.0
MS4A4A	51338	symbol	H. sapiens	51338	H. sapiens	MS4A4A	membrane spanning 4-domains A4A								0.0	0.0	0.0	0.0	0.0	0.0	0.0	0.0	0.0	0.0	0.0	0.0	0.0	0.0	0.0	0.0	0.0	0.0	0.0	0.0
MS4A4E	643680	symbol	H. sapiens	643680	H. sapiens	MS4A4E	membrane spanning 4-domains A4E								0.0	0.0	0.0	0.0	0.0	0.0	0.0	0.0	0.0	0.0	0.0	0.0	0.0	0.0	0.0	0.0	0.0	0.0	0.0	0.0
MS4A6A	64231	symbol	H. sapiens	64231	H. sapiens	MS4A6A	membrane spanning 4-domains A6A								0.0	0.0	0.0	0.0	0.0	0.0	0.0	0.0	0.0	0.0	0.0	0.0	0.0	0.0	0.0	0.0	0.0	0.0	0.0	0.0
MS4A7	58475	symbol	H. sapiens	58475	H. sapiens	MS4A7	membrane spanning 4-domains A7								0.0	0.0	0.0	0.0	0.0	0.0	0.0	0.0	0.0	0.0	0.0	0.0	0.0	0.0	0.0	0.0	0.0	0.0	0.0	0.0
MSN	4478	symbol	H. sapiens	4478	H. sapiens	MSN	moesin	GO:0070489 T cell aggregation;GO:1902966 positive regulation of protein localization to early endosome;GO:0071593 lymphocyte aggregation			Plasma membrane(Enhanced)		(M41)PID ER NONGENOMIC PATHWAY; (M12)PID RHOA PATHWAY	(M5915)HALLMARK APICAL JUNCTION	0.0	1.0	1.0	0.0	1.0	0.0	0.0	1.0	0.0	0.0	0.0	0.0	0.0	0.0	0.0	0.0	0.0	0.0	0.0	0.0
MSR1	4481	symbol	H. sapiens	4481	H. sapiens	MSR1	macrophage scavenger receptor 1	GO:0010886 positive regulation of cholesterol storage;GO:0010744 positive regulation of macrophage derived foam cell differentiation;GO:0010885 regulation of cholesterol storage		CD markers				(M5932)HALLMARK INFLAMMATORY RESPONSE	0.0	0.0	0.0	0.0	0.0	0.0	0.0	0.0	0.0	0.0	0.0	0.0	1.0	0.0	0.0	0.0	0.0	0.0	0.0	0.0
MT-ATP6						None	None	None	None	None	None	None	None	None	nan	nan	nan	nan	nan	nan	nan	nan	nan	nan	nan	nan	nan	nan	nan	nan	nan	nan	nan	nan
MT-CO1						None	None	None	None	None	None	None	None	None	nan	nan	nan	nan	nan	nan	nan	nan	nan	nan	nan	nan	nan	nan	nan	nan	nan	nan	nan	nan
MT-CYB						None	None	None	None	None	None	None	None	None	nan	nan	nan	nan	nan	nan	nan	nan	nan	nan	nan	nan	nan	nan	nan	nan	nan	nan	nan	nan
MTL5	9633	gene_synonym	H. sapiens	9633	H. sapiens	TESMIN	testis expressed metallothionein like protein	GO:0007283 spermatogenesis;GO:0006875 cellular metal ion homeostasis;GO:0048232 male gamete generation			Nucleoplasm(Supported)				0.0	0.0	0.0	0.0	0.0	0.0	0.0	0.0	0.0	0.0	0.0	0.0	0.0	0.0	0.0	0.0	0.0	0.0	0.0	0.0
MTMR11	10903	symbol	H. sapiens	10903	H. sapiens	MTMR11	myotubularin related protein 11				Centrosome(Approved)				0.0	0.0	0.0	0.0	0.0	0.0	0.0	0.0	0.0	0.0	0.0	0.0	0.0	0.0	0.0	0.0	0.0	0.0	0.0	0.0
MT-ND4						None	None	None	None	None	None	None	None	None	nan	nan	nan	nan	nan	nan	nan	nan	nan	nan	nan	nan	nan	nan	nan	nan	nan	nan	nan	nan
MT-ND4L						None	None	None	None	None	None	None	None	None	nan	nan	nan	nan	nan	nan	nan	nan	nan	nan	nan	nan	nan	nan	nan	nan	nan	nan	nan	nan
MT-ND5						None	None	None	None	None	None	None	None	None	nan	nan	nan	nan	nan	nan	nan	nan	nan	nan	nan	nan	nan	nan	nan	nan	nan	nan	nan	nan
MT-ND6						None	None	None	None	None	None	None	None	None	nan	nan	nan	nan	nan	nan	nan	nan	nan	nan	nan	nan	nan	nan	nan	nan	nan	nan	nan	nan
MUC1	4582	symbol	H. sapiens	4582	H. sapiens	MUC1	mucin 1, cell surface associated	GO:0006977 DNA damage response, signal transduction by p53 class mediator resulting in cell cycle arrest;GO:0090240 positive regulation of histone H4 acetylation;GO:0072431 signal transduction involved in mitotic G1 DNA damage checkpoint		CD markers			(M5880)NABA ECM AFFILIATED; (M5885)NABA MATRISOME ASSOCIATED; (M5889)NABA MATRISOME	(M5947)HALLMARK IL2 STAT5 SIGNALING; (M5906)HALLMARK ESTROGEN RESPONSE EARLY	0.0	1.0	1.0	0.0	0.0	0.0	1.0	0.0	1.0	0.0	1.0	0.0	0.0	0.0	0.0	1.0	0.0	0.0	0.0	0.0
MUC13	56667	symbol	H. sapiens	56667	H. sapiens	MUC13	mucin 13, cell surface associated	GO:0002223 stimulatory C-type lectin receptor signaling pathway;GO:0002220 innate immune response activating cell surface receptor signaling pathway;GO:0030277 maintenance of gastrointestinal epithelium					(M5880)NABA ECM AFFILIATED; (M5885)NABA MATRISOME ASSOCIATED; (M5889)NABA MATRISOME		0.0	0.0	0.0	0.0	0.0	0.0	1.0	0.0	1.0	0.0	0.0	0.0	0.0	0.0	0.0	1.0	0.0	0.0	0.0	0.0
MUC3A	4584	symbol	H. sapiens	4584	H. sapiens	MUC3A	mucin 3A, cell surface associated	GO:0002223 stimulatory C-type lectin receptor signaling pathway;GO:0002220 innate immune response activating cell surface receptor signaling pathway;GO:0016266 O-glycan processing					(M5880)NABA ECM AFFILIATED; (M5885)NABA MATRISOME ASSOCIATED; (M5889)NABA MATRISOME		0.0	0.0	0.0	0.0	0.0	0.0	1.0	0.0	1.0	0.0	0.0	0.0	0.0	0.0	0.0	1.0	0.0	0.0	0.0	0.0
MUC6	4588	symbol	H. sapiens	4588	H. sapiens	MUC6	mucin 6, oligomeric mucus/gel-forming	GO:0002223 stimulatory C-type lectin receptor signaling pathway;GO:0002220 innate immune response activating cell surface receptor signaling pathway;GO:0030277 maintenance of gastrointestinal epithelium					(M5880)NABA ECM AFFILIATED; (M5885)NABA MATRISOME ASSOCIATED; (M5889)NABA MATRISOME		0.0	0.0	0.0	0.0	0.0	0.0	1.0	0.0	1.0	0.0	0.0	0.0	0.0	0.0	0.0	1.0	0.0	0.0	0.0	0.0
MVP	9961	symbol	H. sapiens	9961	H. sapiens	MVP	major vault protein	GO:0031953 negative regulation of protein autophosphorylation;GO:0061099 negative regulation of protein tyrosine kinase activity;GO:0050732 negative regulation of peptidyl-tyrosine phosphorylation		Transporters/Transporter channels and pores	Cytosol(Enhanced)		(M17761)ST WNT BETA CATENIN PATHWAY	(M5949)HALLMARK PEROXISOME; (M5913)HALLMARK INTERFERON GAMMA RESPONSE	1.0	0.0	0.0	0.0	0.0	0.0	0.0	0.0	0.0	0.0	0.0	0.0	0.0	0.0	0.0	0.0	0.0	0.0	0.0	0.0
MXRA5	25878	symbol	H. sapiens	25878	H. sapiens	MXRA5	matrix remodeling associated 5	GO:0071559 response to transforming growth factor beta;GO:0070848 response to growth factor;GO:0009719 response to endogenous stimulus			Mitochondria(Uncertain)		(M3008)NABA ECM GLYCOPROTEINS; (M5884)NABA CORE MATRISOME; (M5889)NABA MATRISOME	(M5930)HALLMARK EPITHELIAL MESENCHYMAL TRANSITION	0.0	0.0	0.0	0.0	0.0	0.0	0.0	0.0	0.0	0.0	0.0	1.0	0.0	0.0	0.0	0.0	0.0	0.0	0.0	0.0
MXRA8	54587	symbol	H. sapiens	54587	H. sapiens	MXRA8	matrix remodeling associated 8	GO:0060857 establishment of glial blood-brain barrier;GO:0060856 establishment of blood-brain barrier;GO:0021782 glial cell development			Nucleoli(Approved)				0.0	0.0	0.0	0.0	0.0	0.0	0.0	0.0	0.0	0.0	0.0	0.0	0.0	0.0	0.0	0.0	0.0	0.0	0.0	0.0
MYADM	91663	symbol	H. sapiens	91663	H. sapiens	MYADM	myeloid associated differentiation marker	GO:0034115 negative regulation of heterotypic cell-cell adhesion;GO:0090038 negative regulation of protein kinase C signaling;GO:0070587 regulation of cell-cell adhesion involved in gastrulation		Transporters/Transporter channels and pores	Nuclear speckles(Approved)				0.0	0.0	1.0	0.0	1.0	0.0	0.0	0.0	0.0	0.0	1.0	0.0	0.0	0.0	0.0	0.0	0.0	0.0	0.0	0.0
MYBPC3	4607	symbol	H. sapiens	4607	H. sapiens	MYBPC3	myosin binding protein C3	GO:0032971 regulation of muscle filament sliding;GO:0030049 muscle filament sliding;GO:0055010 ventricular cardiac muscle tissue morphogenesis						(M5909)HALLMARK MYOGENESIS	0.0	0.0	0.0	0.0	0.0	0.0	0.0	0.0	0.0	0.0	0.0	0.0	0.0	0.0	0.0	0.0	0.0	0.0	0.0	0.0
MYBPH	4608	symbol	H. sapiens	4608	H. sapiens	MYBPH	myosin binding protein H	GO:0006942 regulation of striated muscle contraction;GO:0006937 regulation of muscle contraction;GO:0006941 striated muscle contraction			Mitochondria;Nucleoli;Nucleus(Approved)			(M5909)HALLMARK MYOGENESIS	0.0	0.0	0.0	0.0	0.0	0.0	0.0	0.0	0.0	0.0	0.0	0.0	0.0	0.0	0.0	0.0	0.0	0.0	0.0	0.0
MYCBPAP	84073	symbol	H. sapiens	84073	H. sapiens	MYCBPAP	MYCBP associated protein	GO:0007283 spermatogenesis;GO:0048232 male gamete generation;GO:0007268 chemical synaptic transmission			Vesicles(Supported)				0.0	0.0	0.0	0.0	0.0	0.0	0.0	0.0	0.0	0.0	0.0	0.0	0.0	0.0	0.0	0.0	0.0	0.0	0.0	0.0
MYD88	4615	symbol	H. sapiens	4615	H. sapiens	MYD88	MYD88 innate immune signal transduction adaptor	GO:0034162 toll-like receptor 9 signaling pathway;GO:0002755 MyD88-dependent toll-like receptor signaling pathway;GO:0070935 3'-UTR-mediated mRNA stabilization			Cytosol(Supported)Mitochondria;Vesicles(Approved)		(M264)PID TOLL ENDOGENOUS PATHWAY; (M110)PID IL1 PATHWAY; (M153)PID P75 NTR PATHWAY	(M5897)HALLMARK IL6 JAK STAT3 SIGNALING; (M5923)HALLMARK PI3K AKT MTOR SIGNALING; (M5913)HALLMARK INTERFERON GAMMA RESPONSE	0.0	1.0	0.0	1.0	0.0	0.0	1.0	1.0	1.0	0.0	0.0	0.0	1.0	1.0	1.0	0.0	0.0	0.0	0.0	0.0
MYH9	4627	symbol	H. sapiens	4627	H. sapiens	MYH9	myosin heavy chain 9	GO:1903923 positive regulation of protein processing in phagocytic vesicle;GO:1903919 negative regulation of actin filament severing;GO:1903921 regulation of protein processing in phagocytic vesicle			Actin filaments;Cytosol;Plasma membrane(Supported)			(M5919)HALLMARK HEDGEHOG SIGNALING; (M5893)HALLMARK MITOTIC SPINDLE; (M5891)HALLMARK HYPOXIA	1.0	0.0	1.0	0.0	1.0	0.0	0.0	0.0	0.0	0.0	0.0	0.0	0.0	0.0	0.0	0.0	0.0	0.0	1.0	1.0
MYO1A	4640	symbol	H. sapiens	4640	H. sapiens	MYO1A	myosin IA	GO:0030050 vesicle transport along actin filament;GO:0030033 microvillus assembly;GO:0099515 actin filament-based transport							0.0	0.0	0.0	0.0	0.0	0.0	0.0	0.0	0.0	0.0	0.0	0.0	0.0	0.0	0.0	0.0	0.0	0.0	0.0	0.0
MYO1C	4641	symbol	H. sapiens	4641	H. sapiens	MYO1C	myosin IC	GO:1900748 positive regulation of vascular endothelial growth factor signaling pathway;GO:0038089 positive regulation of cell migration by vascular endothelial growth factor signaling pathway;GO:0090314 positive regulation of protein targeting to membrane		Transporters/Transporter channels and pores	Plasma membrane(Enhanced)Nuclear bodies(Supported)			(M5947)HALLMARK IL2 STAT5 SIGNALING; (M5909)HALLMARK MYOGENESIS	0.0	0.0	0.0	1.0	1.0	0.0	1.0	0.0	0.0	0.0	0.0	0.0	0.0	0.0	0.0	0.0	0.0	0.0	0.0	0.0
MYO1F	4542	symbol	H. sapiens	4542	H. sapiens	MYO1F	myosin IF	GO:0030050 vesicle transport along actin filament;GO:0099515 actin filament-based transport;GO:0099518 vesicle cytoskeletal trafficking							0.0	0.0	0.0	0.0	0.0	0.0	0.0	0.0	0.0	0.0	0.0	0.0	0.0	0.0	0.0	0.0	0.0	0.0	0.0	0.0
MYO1G	64005	symbol	H. sapiens	64005	H. sapiens	MYO1G	myosin IG	GO:0120117 T cell meandering migration;GO:0071976 cell gliding;GO:0038096 Fc-gamma receptor signaling pathway involved in phagocytosis							0.0	0.0	0.0	0.0	1.0	1.0	1.0	0.0	0.0	0.0	0.0	0.0	0.0	0.0	0.0	0.0	0.0	0.0	0.0	0.0
MYO7A	4647	symbol	H. sapiens	4647	H. sapiens	MYO7A	myosin VIIA	GO:0060088 auditory receptor cell stereocilium organization;GO:0002093 auditory receptor cell morphogenesis;GO:0060117 auditory receptor cell development			Cytosol(Approved)				0.0	0.0	0.0	0.0	0.0	0.0	0.0	0.0	0.0	0.0	0.0	0.0	0.0	0.0	0.0	0.0	0.0	0.0	0.0	0.0
MYOF	26509	symbol	H. sapiens	26509	H. sapiens	MYOF	myoferlin	GO:0033292 T-tubule organization;GO:0001778 plasma membrane repair;GO:0006071 glycerol metabolic process			Plasma membrane;Vesicles(Supported)		(M237)PID VEGFR1 2 PATHWAY	(M5906)HALLMARK ESTROGEN RESPONSE EARLY; (M5907)HALLMARK ESTROGEN RESPONSE LATE	0.0	0.0	0.0	0.0	0.0	0.0	0.0	0.0	0.0	0.0	0.0	0.0	0.0	0.0	0.0	0.0	0.0	0.0	0.0	1.0
MZB1	51237	symbol	H. sapiens	51237	H. sapiens	MZB1	marginal zone B and B1 cell specific protein	GO:0002642 positive regulation of immunoglobulin biosynthetic process;GO:0002640 regulation of immunoglobulin biosynthetic process;GO:0002378 immunoglobulin biosynthetic process							0.0	0.0	1.0	0.0	0.0	1.0	0.0	0.0	0.0	0.0	0.0	0.0	0.0	0.0	0.0	0.0	0.0	0.0	0.0	0.0
MZF1	7593	symbol	H. sapiens	7593	H. sapiens	MZF1	myeloid zinc finger 1	GO:0000122 negative regulation of transcription by RNA polymerase II;GO:0045944 positive regulation of transcription by RNA polymerase II;GO:0045892 negative regulation of transcription, DNA-templated		Transcription factors/Zinc-coordinating DNA-binding domains	Nucleus(Supported)				0.0	0.0	0.0	0.0	0.0	0.0	0.0	0.0	0.0	0.0	0.0	0.0	0.0	0.0	0.0	0.0	0.0	0.0	0.0	0.0
NAAA	27163	symbol	H. sapiens	27163	H. sapiens	NAAA	N-acylethanolamine acid amidase	GO:0070291 N-acylethanolamine metabolic process;GO:0042439 ethanolamine-containing compound metabolic process;GO:0006576 cellular biogenic amine metabolic process							0.0	0.0	0.0	0.0	0.0	0.0	0.0	0.0	0.0	0.0	0.0	0.0	0.0	0.0	0.0	0.0	0.0	0.0	0.0	0.0
NABP1	64859	symbol	H. sapiens	64859	H. sapiens	NABP1	nucleic acid binding protein 1	GO:0042795 snRNA transcription by RNA polymerase II;GO:0009301 snRNA transcription;GO:0098781 ncRNA transcription			Nucleoplasm(Supported)Cytosol(Approved)			(M5922)HALLMARK UNFOLDED PROTEIN RESPONSE; (M5905)HALLMARK ADIPOGENESIS	0.0	0.0	0.0	0.0	0.0	0.0	0.0	0.0	0.0	0.0	0.0	0.0	0.0	0.0	0.0	0.0	0.0	0.0	0.0	0.0
NADSYN1	55191	symbol	H. sapiens	55191	H. sapiens	NADSYN1	NAD synthetase 1	GO:0009435 NAD biosynthetic process;GO:0019674 NAD metabolic process;GO:0019359 nicotinamide nucleotide biosynthetic process		Enzymes/ENZYME proteins/Ligase	Cytosol(Enhanced)	L-Glutamic Acid (Nad+ synthase (glutamine-hydrolyzing) activity)		(M5906)HALLMARK ESTROGEN RESPONSE EARLY	0.0	0.0	0.0	0.0	0.0	0.0	0.0	0.0	0.0	0.0	0.0	0.0	0.0	0.0	0.0	0.0	0.0	0.0	0.0	0.0
NAGA	4668	symbol	H. sapiens	4668	H. sapiens	NAGA	alpha-N-acetylgalactosaminidase	GO:0046477 glycosylceramide catabolic process;GO:0046479 glycosphingolipid catabolic process;GO:0046514 ceramide catabolic process		Enzymes/ENZYME proteins/Hydrolases		Glycerol (Protein homodimerization activity)			0.0	0.0	0.0	0.0	0.0	0.0	0.0	0.0	0.0	0.0	0.0	0.0	0.0	0.0	0.0	0.0	0.0	0.0	0.0	0.0
NAGPA	51172	symbol	H. sapiens	51172	H. sapiens	NAGPA	N-acetylglucosamine-1-phosphodiester alpha-N-acetylglucosaminidase	GO:0006622 protein targeting to lysosome;GO:0033299 secretion of lysosomal enzymes;GO:0061462 protein localization to lysosome		Enzymes/ENZYME proteins/Hydrolases		N-Acetyl-D-glucosamine (N-acetylglucosamine-1-phosphodiester alpha-n-acetylglucosaminidase activity)			0.0	0.0	0.0	1.0	0.0	0.0	0.0	0.0	0.0	0.0	0.0	0.0	0.0	0.0	0.0	0.0	0.0	0.0	0.0	0.0
NAIP	4671	symbol	H. sapiens	4671	H. sapiens	NAIP	NLR family apoptosis inhibitory protein	GO:0043154 negative regulation of cysteine-type endopeptidase activity involved in apoptotic process;GO:2000117 negative regulation of cysteine-type endopeptidase activity;GO:0043281 regulation of cysteine-type endopeptidase activity involved in apoptotic process							0.0	0.0	0.0	0.0	0.0	0.0	0.0	0.0	0.0	0.0	0.0	0.0	0.0	0.0	0.0	0.0	0.0	0.0	0.0	0.0
NAMPT	10135	symbol	H. sapiens	10135	H. sapiens	NAMPT	nicotinamide phosphoribosyltransferase	GO:1905377 response to D-galactose;GO:0034356 NAD biosynthesis via nicotinamide riboside salvage pathway;GO:0014916 regulation of lung blood pressure		Enzymes/ENZYME proteins/Transferases	Cell Junctions;Nuclear speckles(Approved)	GMX1777 (Nicotinate-nucleotide diphosphorylase (carboxylating) activity);N-[4-(1-BENZOYLPIPERIDIN-4-YL)BUTYL]-3-PYRIDIN-3-YLPROPANAMIDE (Nicotinate-nucleotide diphosphorylase (carboxylating) activity)		(M5932)HALLMARK INFLAMMATORY RESPONSE; (M5913)HALLMARK INTERFERON GAMMA RESPONSE; (M5924)HALLMARK MTORC1 SIGNALING	1.0	0.0	0.0	0.0	0.0	0.0	0.0	0.0	0.0	0.0	0.0	0.0	0.0	0.0	0.0	0.0	0.0	0.0	0.0	0.0
NBEAL2	23218	symbol	H. sapiens	23218	H. sapiens	NBEAL2	neurobeachin like 2	GO:0030220 platelet formation;GO:0036344 platelet morphogenesis;GO:0043312 neutrophil degranulation							1.0	0.0	0.0	0.0	0.0	0.0	0.0	0.0	0.0	0.0	0.0	0.0	0.0	0.0	0.0	0.0	0.0	0.0	1.0	0.0
NCF1	653361	symbol	H. sapiens	653361	H. sapiens	NCF1	neutrophil cytosolic factor 1	GO:0045741 positive regulation of epidermal growth factor-activated receptor activity;GO:1900745 positive regulation of p38MAPK cascade;GO:0007176 regulation of epidermal growth factor-activated receptor activity					(M278)PID RAC1 PATHWAY		0.0	0.0	0.0	0.0	0.0	0.0	0.0	0.0	0.0	0.0	0.0	0.0	1.0	0.0	1.0	0.0	1.0	0.0	0.0	0.0
NCF2	4688	symbol	H. sapiens	4688	H. sapiens	NCF2	neutrophil cytosolic factor 2	GO:0002479 antigen processing and presentation of exogenous peptide antigen via MHC class I, TAP-dependent;GO:0042590 antigen processing and presentation of exogenous peptide antigen via MHC class I;GO:0042554 superoxide anion generation			Cytosol(Enhanced)Nucleoli(Supported)		(M278)PID RAC1 PATHWAY		0.0	0.0	0.0	0.0	0.0	0.0	0.0	0.0	0.0	0.0	0.0	0.0	1.0	0.0	1.0	0.0	1.0	0.0	0.0	0.0
NCF4	4689	symbol	H. sapiens	4689	H. sapiens	NCF4	neutrophil cytosolic factor 4	GO:0002479 antigen processing and presentation of exogenous peptide antigen via MHC class I, TAP-dependent;GO:0042590 antigen processing and presentation of exogenous peptide antigen via MHC class I;GO:0002474 antigen processing and presentation of peptide antigen via MHC class I			Cytosol(Supported)			(M5950)HALLMARK ALLOGRAFT REJECTION	0.0	0.0	0.0	0.0	0.0	0.0	0.0	0.0	0.0	0.0	0.0	0.0	1.0	0.0	1.0	0.0	1.0	0.0	0.0	0.0
NCKAP1L	3071	symbol	H. sapiens	3071	H. sapiens	NCKAP1L	NCK associated protein 1 like	GO:0043378 positive regulation of CD8-positive, alpha-beta T cell differentiation;GO:0045588 positive regulation of gamma-delta T cell differentiation;GO:0043376 regulation of CD8-positive, alpha-beta T cell differentiation			Cytosol;Plasma membrane(Uncertain)				1.0	0.0	1.0	1.0	1.0	0.0	1.0	0.0	0.0	1.0	0.0	0.0	0.0	1.0	0.0	0.0	0.0	0.0	1.0	0.0
NDST2	8509	symbol	H. sapiens	8509	H. sapiens	NDST2	N-deacetylase and N-sulfotransferase 2	GO:0030210 heparin biosynthetic process;GO:0015014 heparan sulfate proteoglycan biosynthetic process, polysaccharide chain biosynthetic process;GO:0030202 heparin metabolic process		Enzymes/ENZYME proteins/Transferases	Cytosol(Approved)			(M5891)HALLMARK HYPOXIA	0.0	0.0	0.0	0.0	0.0	0.0	0.0	0.0	0.0	0.0	0.0	0.0	0.0	0.0	0.0	0.0	0.0	0.0	0.0	0.0
NEK10	152110	symbol	H. sapiens	152110	H. sapiens	NEK10	NIMA related kinase 10	GO:0031954 positive regulation of protein autophosphorylation;GO:0043406 positive regulation of MAP kinase activity;GO:0031952 regulation of protein autophosphorylation	NEK Ser/Thr protein kinase family	Enzymes/{ENZYME proteins/Transferases,Kinases/NEK Ser/Thr protein kinases}	Nucleoplasm;Vesicles(Approved)				0.0	0.0	0.0	0.0	0.0	0.0	0.0	0.0	0.0	0.0	0.0	0.0	0.0	0.0	0.0	0.0	0.0	0.0	0.0	0.0
NEURL2	140825	symbol	H. sapiens	140825	H. sapiens	NEURL2	neuralized E3 ubiquitin protein ligase 2	GO:0043687 post-translational protein modification;GO:0016567 protein ubiquitination;GO:0032446 protein modification by small protein conjugation			Vesicles(Approved)				0.0	0.0	0.0	0.0	0.0	0.0	0.0	0.0	0.0	0.0	0.0	0.0	0.0	0.0	0.0	0.0	0.0	0.0	0.0	0.0
NFAM1	150372	symbol	H. sapiens	150372	H. sapiens	NFAM1	NFAT activating protein with ITAM motif 1	GO:0050861 positive regulation of B cell receptor signaling pathway;GO:0050855 regulation of B cell receptor signaling pathway;GO:0050857 positive regulation of antigen receptor-mediated signaling pathway							1.0	0.0	1.0	1.0	0.0	0.0	1.0	0.0	0.0	0.0	0.0	0.0	0.0	0.0	0.0	0.0	0.0	0.0	0.0	0.0
NFATC2	4773	symbol	H. sapiens	4773	H. sapiens	NFATC2	nuclear factor of activated T cells 2	GO:1905064 negative regulation of vascular smooth muscle cell differentiation;GO:1901741 positive regulation of myoblast fusion;GO:0045589 regulation of regulatory T cell differentiation		Transcription factors/Immunoglobulin fold	Cytosol;Nucleoplasm(Supported)		(M235)PID TCR CALCIUM PATHWAY; (M23)PID WNT NONCANONICAL PATHWAY; (M65)PID FRA PATHWAY		0.0	0.0	1.0	0.0	0.0	0.0	1.0	0.0	0.0	0.0	0.0	0.0	1.0	0.0	1.0	0.0	1.0	0.0	1.0	0.0
NFATC4	4776	symbol	H. sapiens	4776	H. sapiens	NFATC4	nuclear factor of activated T cells 4	GO:0050774 negative regulation of dendrite morphogenesis;GO:2000297 negative regulation of synapse maturation;GO:1904637 cellular response to ionomycin		Transcription factors/Immunoglobulin fold	Cytosol;Nuclear speckles(Supported)		(M175)PID ERBB2 ERBB3 PATHWAY		0.0	0.0	0.0	1.0	0.0	0.0	0.0	1.0	0.0	0.0	0.0	0.0	1.0	0.0	0.0	0.0	0.0	0.0	1.0	0.0
NFE2	4778	symbol	H. sapiens	4778	H. sapiens	NFE2	nuclear factor, erythroid 2	GO:0006337 nucleosome disassembly;GO:0045652 regulation of megakaryocyte differentiation;GO:0031498 chromatin disassembly		Transcription factors/Basic domains	Actin filaments;Nucleoplasm(Approved)			(M5945)HALLMARK HEME METABOLISM	0.0	0.0	1.0	0.0	0.0	0.0	0.0	0.0	0.0	0.0	0.0	0.0	0.0	0.0	0.0	0.0	0.0	0.0	1.0	1.0
NFE2L3	9603	symbol	H. sapiens	9603	H. sapiens	NFE2L3	nuclear factor, erythroid 2 like 3	GO:0000122 negative regulation of transcription by RNA polymerase II;GO:0045892 negative regulation of transcription, DNA-templated;GO:1903507 negative regulation of nucleic acid-templated transcription		Transcription factors/Basic domains	Nucleoplasm;Vesicles(Approved)				0.0	0.0	0.0	0.0	0.0	0.0	0.0	0.0	0.0	0.0	0.0	0.0	0.0	0.0	0.0	0.0	0.0	0.0	0.0	0.0
NFKB1	4790	symbol	H. sapiens	4790	H. sapiens	NFKB1	nuclear factor kappa B subunit 1	GO:0010956 negative regulation of calcidiol 1-monooxygenase activity;GO:1900127 positive regulation of hyaluronan biosynthetic process;GO:0045083 negative regulation of interleukin-12 biosynthetic process		RAS pathway related proteins;Transcription factors/Immunoglobulin fold	Cytosol;Nucleoplasm(Supported)	Thalidomide (Transcriptional repressor activity, rna polymerase ii transcription regulatory region sequence-specific binding);Pranlukast (Transcriptional repressor activity, rna polymerase ii transcription regulatory region sequence-specific binding);HE3286 (Transcriptional repressor activity, rna polymerase ii transcription regulatory region sequence-specific binding);P54 (Transcriptional repres…	(M26)PID NFKAPPAB ATYPICAL PATHWAY; (M37)PID NFKAPPAB CANONICAL PATHWAY; (M7416)ST GAQ PATHWAY	(M5942)HALLMARK UV RESPONSE DN; (M5932)HALLMARK INFLAMMATORY RESPONSE; (M5913)HALLMARK INTERFERON GAMMA RESPONSE	1.0	1.0	0.0	1.0	0.0	0.0	1.0	1.0	1.0	0.0	0.0	0.0	1.0	1.0	1.0	0.0	1.0	1.0	0.0	0.0
NFKB2	4791	symbol	H. sapiens	4791	H. sapiens	NFKB2	nuclear factor kappa B subunit 2	GO:0002268 follicular dendritic cell differentiation;GO:0002266 follicular dendritic cell activation;GO:0002467 germinal center formation		Transcription factors/Immunoglobulin fold	Cytosol;Nucleoplasm(Approved)	Acetylsalicylic acid (Transcriptional activator activity, rna polymerase ii core promoter proximal region sequence-specific binding);Glucosamine (Transcriptional activator activity, rna polymerase ii core promoter proximal region sequence-specific binding);HE3286 (Transcriptional activator activity, rna polymerase ii core promoter proximal region sequence-specific binding);P54 (Transcriptional ac…	(M7416)ST GAQ PATHWAY; (M18030)ST TUMOR NECROSIS FACTOR PATHWAY; (M12705)SIG CD40PATHWAYMAP	(M5890)HALLMARK TNFA SIGNALING VIA NFKB	0.0	1.0	0.0	1.0	0.0	1.0	0.0	1.0	0.0	0.0	0.0	1.0	1.0	0.0	0.0	0.0	1.0	0.0	0.0	0.0
NFKBID	84807	symbol	H. sapiens	84807	H. sapiens	NFKBID	NFKB inhibitor delta	GO:2000321 positive regulation of T-helper 17 cell differentiation;GO:2000319 regulation of T-helper 17 cell differentiation;GO:0045624 positive regulation of T-helper cell differentiation		Transcription factors/Immunoglobulin fold	Mitochondria(Approved)				1.0	0.0	1.0	0.0	0.0	1.0	1.0	0.0	0.0	1.0	1.0	0.0	0.0	0.0	0.0	0.0	0.0	0.0	1.0	0.0
NFKBIZ	64332	symbol	H. sapiens	64332	H. sapiens	NFKBIZ	NFKB inhibitor zeta	GO:2000321 positive regulation of T-helper 17 cell differentiation;GO:2000319 regulation of T-helper 17 cell differentiation;GO:0045624 positive regulation of T-helper cell differentiation		Transcription factors/Immunoglobulin fold	Nuclear speckles(Supported)Cytoplasmic bodies(Approved)			(M5947)HALLMARK IL2 STAT5 SIGNALING	1.0	0.0	1.0	0.0	0.0	1.0	1.0	0.0	1.0	1.0	0.0	0.0	0.0	1.0	0.0	0.0	0.0	0.0	0.0	0.0
NHLRC3	387921	symbol	H. sapiens	387921	H. sapiens	NHLRC3	NHL repeat containing 3	GO:0043312 neutrophil degranulation;GO:0002283 neutrophil activation involved in immune response;GO:0042119 neutrophil activation							1.0	0.0	0.0	0.0	0.0	0.0	0.0	0.0	0.0	0.0	0.0	0.0	0.0	0.0	0.0	0.0	0.0	0.0	0.0	0.0
NIPAL2	79815	symbol	H. sapiens	79815	H. sapiens	NIPAL2	NIPA like domain containing 2	GO:1903830 magnesium ion transmembrane transport;GO:0015693 magnesium ion transport;GO:0070838 divalent metal ion transport							0.0	0.0	0.0	0.0	0.0	0.0	0.0	0.0	0.0	0.0	0.0	0.0	0.0	0.0	0.0	0.0	0.0	0.0	0.0	0.0
NKG7	4818	symbol	H. sapiens	4818	H. sapiens	NKG7	natural killer cell granule protein 7				Vesicles(Approved)				0.0	0.0	0.0	0.0	0.0	0.0	0.0	0.0	0.0	0.0	0.0	0.0	0.0	0.0	0.0	0.0	0.0	0.0	0.0	0.0
NLRC4	58484	symbol	H. sapiens	58484	H. sapiens	NLRC4	NLR family CARD domain containing 4	GO:0050713 negative regulation of interleukin-1 beta secretion;GO:0050711 negative regulation of interleukin-1 secretion;GO:0097202 activation of cysteine-type endopeptidase activity					(M145)PID P53 DOWNSTREAM PATHWAY		0.0	0.0	0.0	1.0	0.0	0.0	1.0	1.0	1.0	0.0	0.0	0.0	0.0	0.0	0.0	0.0	0.0	0.0	0.0	0.0
NLRC5	84166	symbol	H. sapiens	84166	H. sapiens	NLRC5	NLR family CARD domain containing 5	GO:0060335 positive regulation of interferon-gamma-mediated signaling pathway;GO:0060340 positive regulation of type I interferon-mediated signaling pathway;GO:0060339 negative regulation of type I interferon-mediated signaling pathway			Centrosome(Supported)			(M5913)HALLMARK INTERFERON GAMMA RESPONSE	0.0	1.0	0.0	1.0	0.0	0.0	0.0	1.0	1.0	0.0	1.0	0.0	0.0	0.0	0.0	0.0	0.0	0.0	0.0	0.0
NLRP12	91662	symbol	H. sapiens	91662	H. sapiens	NLRP12	NLR family pyrin domain containing 12	GO:0045381 regulation of interleukin-18 biosynthetic process;GO:0042241 interleukin-18 biosynthetic process;GO:0050718 positive regulation of interleukin-1 beta secretion							0.0	0.0	0.0	1.0	1.0	0.0	0.0	0.0	1.0	0.0	0.0	0.0	0.0	1.0	0.0	0.0	0.0	0.0	0.0	0.0
NLRP3	114548	symbol	H. sapiens	114548	H. sapiens	NLRP3	NLR family pyrin domain containing 3	GO:0045630 positive regulation of T-helper 2 cell differentiation;GO:2000321 positive regulation of T-helper 17 cell differentiation;GO:0045628 regulation of T-helper 2 cell differentiation						(M5932)HALLMARK INFLAMMATORY RESPONSE; (M5950)HALLMARK ALLOGRAFT REJECTION	1.0	0.0	1.0	1.0	0.0	1.0	0.0	1.0	0.0	1.0	0.0	0.0	1.0	1.0	0.0	0.0	0.0	0.0	0.0	0.0
NLRP6	171389	symbol	H. sapiens	171389	H. sapiens	NLRP6	NLR family pyrin domain containing 6	GO:0034122 negative regulation of toll-like receptor signaling pathway;GO:0034121 regulation of toll-like receptor signaling pathway;GO:0070255 regulation of mucus secretion							0.0	0.0	0.0	0.0	0.0	0.0	1.0	1.0	1.0	0.0	1.0	0.0	0.0	1.0	0.0	0.0	0.0	0.0	0.0	1.0
NME8	51314	symbol	H. sapiens	51314	H. sapiens	NME8	NME/NM23 family member 8	GO:0030317 flagellated sperm motility;GO:0097722 sperm motility;GO:0034614 cellular response to reactive oxygen species							0.0	0.0	0.0	0.0	0.0	0.0	0.0	0.0	0.0	0.0	0.0	0.0	0.0	0.0	0.0	0.0	0.0	0.0	0.0	0.0
NMUR1	10316	symbol	H. sapiens	10316	H. sapiens	NMUR1	neuromedin U receptor 1	GO:0007202 activation of phospholipase C activity;GO:0010863 positive regulation of phospholipase C activity;GO:1900274 regulation of phospholipase C activity		G-protein coupled receptors/GPCRs excl olfactory receptors;Transporters				(M5932)HALLMARK INFLAMMATORY RESPONSE	0.0	0.0	0.0	0.0	0.0	0.0	0.0	0.0	0.0	0.0	0.0	0.0	0.0	0.0	0.0	0.0	0.0	0.0	0.0	0.0
NNMT	4837	symbol	H. sapiens	4837	H. sapiens	NNMT	nicotinamide N-methyltransferase	GO:0034356 NAD biosynthesis via nicotinamide riboside salvage pathway;GO:0009435 NAD biosynthetic process;GO:0019674 NAD metabolic process		Enzymes/ENZYME proteins/Transferases	Cytosol(Supported)Golgi apparatus;Nucleoplasm(Approved)	Niacin (Nicotinamide n-methyltransferase activity)		(M5930)HALLMARK EPITHELIAL MESENCHYMAL TRANSITION	0.0	0.0	0.0	0.0	0.0	0.0	0.0	0.0	0.0	0.0	0.0	0.0	0.0	0.0	0.0	0.0	0.0	0.0	0.0	0.0
NOD1	10392	symbol	H. sapiens	10392	H. sapiens	NOD1	nucleotide binding oligomerization domain containing 1	GO:1904417 positive regulation of xenophagy;GO:0070423 nucleotide-binding oligomerization domain containing signaling pathway;GO:1904415 regulation of xenophagy			Mitochondria(Approved)			(M5923)HALLMARK PI3K AKT MTOR SIGNALING; (M5913)HALLMARK INTERFERON GAMMA RESPONSE	0.0	1.0	0.0	1.0	0.0	0.0	1.0	1.0	1.0	0.0	0.0	0.0	1.0	1.0	0.0	0.0	0.0	0.0	0.0	0.0
NOD2	64127	symbol	H. sapiens	64127	H. sapiens	NOD2	nucleotide binding oligomerization domain containing 2	GO:0032498 detection of muramyl dipeptide;GO:0070431 nucleotide-binding oligomerization domain containing 2 signaling pathway;GO:1902523 positive regulation of protein K63-linked ubiquitination			Cytosol(Approved)Golgi apparatus(Uncertain)		(M37)PID NFKAPPAB CANONICAL PATHWAY	(M5932)HALLMARK INFLAMMATORY RESPONSE	0.0	1.0	1.0	1.0	0.0	1.0	1.0	1.0	1.0	0.0	0.0	0.0	1.0	1.0	0.0	0.0	0.0	1.0	0.0	0.0
NPAS2	4862	symbol	H. sapiens	4862	H. sapiens	NPAS2	neuronal PAS domain protein 2	GO:2000987 positive regulation of behavioral fear response;GO:1903367 positive regulation of fear response;GO:2000822 regulation of behavioral fear response		Transcription factors/Basic domains	Nucleoplasm(Approved)		(M95)PID CIRCADIAN PATHWAY		0.0	0.0	0.0	0.0	0.0	0.0	0.0	0.0	1.0	0.0	0.0	0.0	0.0	0.0	0.0	0.0	0.0	0.0	0.0	0.0
NPC2	10577	symbol	H. sapiens	10577	H. sapiens	NPC2	NPC intracellular cholesterol transporter 2	GO:0032367 intracellular cholesterol transport;GO:0046836 glycolipid transport;GO:0033344 cholesterol efflux		Transporters/Electrochemical Potential-driven transporters					1.0	0.0	0.0	0.0	0.0	0.0	0.0	0.0	0.0	0.0	0.0	0.0	0.0	0.0	0.0	0.0	0.0	0.0	0.0	0.0
NPEPL1	79716	symbol	H. sapiens	79716	H. sapiens	NPEPL1	aminopeptidase like 1	GO:0006508 proteolysis;GO:0019538 protein metabolic process;GO:1901564 organonitrogen compound metabolic process		Enzymes/Peptidases/Metallopeptidases	Nucleoplasm(Approved)				0.0	0.0	0.0	0.0	0.0	0.0	0.0	0.0	0.0	0.0	0.0	0.0	0.0	0.0	0.0	0.0	0.0	0.0	0.0	0.0
NR1I2	8856	symbol	H. sapiens	8856	H. sapiens	NR1I2	nuclear receptor subfamily 1 group I member 2	GO:0042908 xenobiotic transport;GO:0042632 cholesterol homeostasis;GO:0042738 exogenous drug catabolic process		Nuclear receptors;Transcription factors/Zinc-coordinating DNA-binding domains	Nucleoplasm(Enhanced)	Vitamin E (Zinc ion binding);Erlotinib (Zinc ion binding);Estradiol (Zinc ion binding);Ethinyl Estradiol (Zinc ion binding);Rifampicin (Zinc ion binding);Rifaximin (Zinc ion binding);Paclitaxel (Zinc ion binding);Docetaxel (Zinc ion binding);Prasterone (Zinc ion binding);Hyperforin (Zinc ion binding);SR12813 (Zinc ion binding);N-(2,2,2-TRIFLUOROETHYL)-N-{4-[2,2,2-TRIFLUORO-1-HYDROXY-1-(TRIFLUOROM…		(M5949)HALLMARK PEROXISOME; (M5948)HALLMARK BILE ACID METABOLISM	0.0	0.0	0.0	0.0	0.0	0.0	0.0	1.0	0.0	0.0	0.0	0.0	0.0	0.0	0.0	0.0	0.0	0.0	0.0	0.0
NRP1	8829	symbol	H. sapiens	8829	H. sapiens	NRP1	neuropilin 1	GO:0021828 gonadotrophin-releasing hormone neuronal migration to the hypothalamus;GO:0021824 cerebral cortex tangential migration using cell-axon interactions;GO:1902336 positive regulation of retinal ganglion cell axon guidance		CD markers	Mitochondria(Uncertain)	Palifermin (Vascular endothelial growth factor-activated receptor activity);Pegaptanib (Vascular endothelial growth factor-activated receptor activity)	(M137)PID VEGF VEGFR PATHWAY; (M226)PID VEGFR1 PATHWAY	(M5944)HALLMARK ANGIOGENESIS; (M5919)HALLMARK HEDGEHOG SIGNALING; (M5942)HALLMARK UV RESPONSE DN	0.0	0.0	1.0	0.0	1.0	0.0	0.0	0.0	0.0	0.0	0.0	0.0	1.0	1.0	0.0	0.0	0.0	0.0	1.0	1.0
NRP2	8828	symbol	H. sapiens	8828	H. sapiens	NRP2	neuropilin 2	GO:0021828 gonadotrophin-releasing hormone neuronal migration to the hypothalamus;GO:0021824 cerebral cortex tangential migration using cell-axon interactions;GO:0021888 hypothalamus gonadotrophin-releasing hormone neuron development			Plasma membrane;Vesicles(Supported)		(M137)PID VEGF VEGFR PATHWAY; (M226)PID VEGFR1 PATHWAY	(M5919)HALLMARK HEDGEHOG SIGNALING	0.0	0.0	0.0	0.0	1.0	0.0	0.0	0.0	0.0	0.0	0.0	0.0	0.0	0.0	0.0	0.0	0.0	0.0	0.0	0.0
NRROS	375387	symbol	H. sapiens	375387	H. sapiens	NRROS	negative regulator of reactive oxygen species	GO:0014005 microglia development;GO:0035583 sequestering of TGFbeta in extracellular matrix;GO:0036364 transforming growth factor beta1 activation							0.0	0.0	1.0	0.0	0.0	0.0	0.0	0.0	0.0	0.0	0.0	0.0	0.0	0.0	0.0	0.0	0.0	0.0	1.0	0.0
NUAK2	81788	symbol	H. sapiens	81788	H. sapiens	NUAK2	NUAK family kinase 2	GO:0042149 cellular response to glucose starvation;GO:0009267 cellular response to starvation;GO:0031669 cellular response to nutrient levels	CAMK Ser/Thr protein kinase family	Enzymes/{ENZYME proteins/Transferases,Kinases/CAMK Ser/Thr protein kinases}	Cytosol;Nucleoli fibrillar center;Nucleus(Approved)				0.0	0.0	0.0	0.0	0.0	0.0	0.0	0.0	0.0	0.0	0.0	0.0	0.0	0.0	0.0	0.0	0.0	0.0	0.0	0.0
NUPR1	26471	symbol	H. sapiens	26471	H. sapiens	NUPR1	nuclear protein 1, transcriptional regulator	GO:0045820 negative regulation of glycolytic process;GO:1903862 positive regulation of oxidative phosphorylation;GO:1904691 negative regulation of type B pancreatic cell proliferation			Cytosol;Nucleus(Approved)			(M5939)HALLMARK P53 PATHWAY; (M5924)HALLMARK MTORC1 SIGNALING	0.0	0.0	0.0	0.0	0.0	0.0	0.0	0.0	1.0	0.0	1.0	0.0	0.0	1.0	0.0	0.0	0.0	0.0	0.0	0.0
NXF3	56000	symbol	H. sapiens	56000	H. sapiens	NXF3	nuclear RNA export factor 3	GO:0016973 poly(A)+ mRNA export from nucleus;GO:0006406 mRNA export from nucleus;GO:0071427 mRNA-containing ribonucleoprotein complex export from nucleus			Nucleoplasm(Supported)				0.0	0.0	0.0	0.0	0.0	0.0	0.0	0.0	0.0	0.0	0.0	0.0	1.0	0.0	0.0	0.0	0.0	0.0	0.0	0.0
OAF	220323	symbol	H. sapiens	220323	H. sapiens	OAF	out at first homolog				Nucleus(Approved)				0.0	0.0	0.0	0.0	0.0	0.0	0.0	0.0	0.0	0.0	0.0	0.0	0.0	0.0	0.0	0.0	0.0	0.0	0.0	0.0
OCIAD2	132299	symbol	H. sapiens	132299	H. sapiens	OCIAD2	OCIA domain containing 2	GO:0009617 response to bacterium;GO:0051707 response to other organism;GO:0043207 response to external biotic stimulus			Mitochondria(Enhanced)				0.0	0.0	0.0	0.0	0.0	0.0	0.0	1.0	0.0	0.0	0.0	0.0	0.0	0.0	0.0	0.0	0.0	0.0	0.0	0.0
ODF3B	440836	symbol	H. sapiens	440836	H. sapiens	ODF3B	outer dense fiber of sperm tails 3B								0.0	0.0	0.0	0.0	0.0	0.0	0.0	0.0	0.0	0.0	0.0	0.0	0.0	0.0	0.0	0.0	0.0	0.0	0.0	0.0
OLFML2B	25903	symbol	H. sapiens	25903	H. sapiens	OLFML2B	olfactomedin like 2B				Cytosol(Approved)				0.0	0.0	0.0	0.0	0.0	0.0	0.0	0.0	0.0	0.0	0.0	0.0	0.0	0.0	0.0	0.0	0.0	0.0	0.0	0.0
OSBPL3	26031	symbol	H. sapiens	26031	H. sapiens	OSBPL3	oxysterol binding protein like 3	GO:0006699 bile acid biosynthetic process;GO:0008206 bile acid metabolic process;GO:0015918 sterol transport			Cytosol;Nucleoli(Supported)				0.0	0.0	0.0	0.0	0.0	0.0	0.0	0.0	0.0	0.0	0.0	0.0	0.0	0.0	0.0	0.0	0.0	0.0	0.0	0.0
OSCAR	126014	symbol	H. sapiens	126014	H. sapiens	OSCAR	osteoclast associated Ig-like receptor	GO:0043312 neutrophil degranulation;GO:0030316 osteoclast differentiation;GO:0038065 collagen-activated signaling pathway							1.0	0.0	1.0	0.0	0.0	0.0	0.0	0.0	0.0	0.0	0.0	0.0	0.0	0.0	1.0	0.0	1.0	0.0	1.0	0.0
[truncated: 478 more rows]

## Sheet: Enrichment
GroupID	Category	Term	Description	LogP	Log(q-value)	InTerm_InList	Genes	Symbols
[truncated: 300 more rows]
